# Supplementary material for: Design and development of intramolecular doubly vinylogous Michael addition to access 3-aryl substituted 2-alkenyl-benzofurans and -indoles
Source: Royal Society of Chemistry journal article supplement (doi:10.1039/d3ob00861d), 2023-01-01
Supplement: d3ob00861d1.pdf [file d3ob00861d1.pdf]

# **Design and Development of Intramolecular Doubly Vinylogous Michael Addition to Access 3-Aryl Substituted 2-Alkenyl-Benzofurans and -Indoles**

***Manyam Subbi Reddy,<sup>a,b</sup> Jagadeesh Babu Nanubolu<sup>c</sup> and Suriseti Suresh<sup>\*a,b</sup>***

*<sup>a</sup>Organic Synthesis and Process Chemistry, CSIR-Indian Institute of Chemical Technology (CSIR-IICT), Hyderabad 500 007, India*

*<sup>b</sup>Academy of Scientific and Innovative Research (AcSIR), Ghaziabad 201002, India*

*<sup>c</sup> Laboratory of X-Ray Crystallography, Department of Analytical Chemistry, CSIR-Indian Institute of Chemical Technology (CSIR-IICT),  
Hyderabad 500 007, India*

## Table of Contents:

|                                                                                                           |     |
|-----------------------------------------------------------------------------------------------------------|-----|
| 1. Synthesis of the starting materials.....                                                               | 3   |
| 2. Step-wise and one-pot reactions of <i>p</i> -QM <b>1a</b> and ethyl 4-bromocrotonoate <b>2a</b> .....  | 10  |
| 3. General experimental procedure for the optimization study .....                                        | 14  |
| 4. Optimization survey .....                                                                              | 15  |
| 5. Experimental procedure for the gram-scale syntheses of <b>5a</b> and <b>5i</b> .....                   | 20  |
| 6. Control experiments and mechanistic studies .....                                                      | 21  |
| 7. Copies of <sup>1</sup> H-NMR, <sup>13</sup> C{ <sup>1</sup> H}NMR and <sup>19</sup> F-NMR spectra..... | 26  |
| 8. Crystallographic data for compounds <b>5i</b> and <b>7m</b> .....                                      | 113 |
| 9. References .....                                                                                       | 117 |

## 1. Synthesis of the starting materials

### 1.1. General procedure for synthesis of substrates 1a-1g:<sup>1</sup>

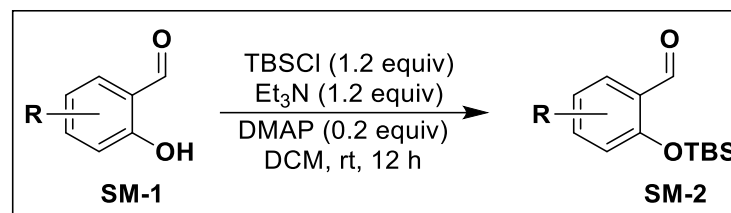

2-Hydroxybenzaldehyde derivatives **SM-1** (1 equiv, 10 mmol), TBSCl (1.2 equiv, 12 mmol, 1.3 g) and DMAP (0.2 equiv, 2 mmol, 0.24 g) were placed into a 50 mL reaction vial, and DCM (20 mL) was added, then Et<sub>3</sub>N (1.2 equiv, 12 mmol, 1.7 mL) was added dropwise at 0 °C and the mixture was stirred overnight at room temperature. To the reaction mixture were added water (5 mL) and DCM (5 mL). The resultant mixture was extracted with DCM (2 x 20 mL). The combined organic phase was dried over anhydrous Na<sub>2</sub>SO<sub>4</sub>, resulting in a white viscous liquid, which was used directly in the next step without further purification.

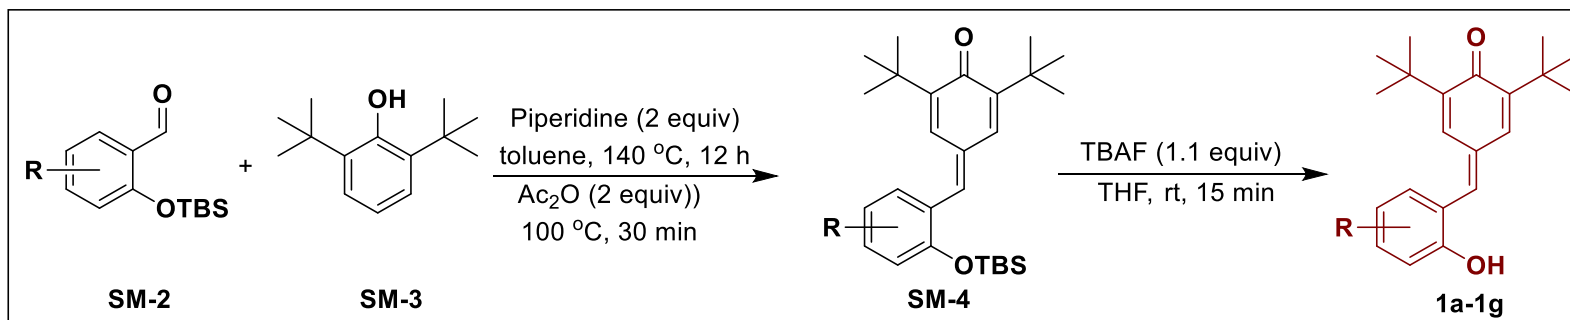

A solution of 2,6-di-*tert*-butylphenol **SM-3** (1.1 equiv, 11 mmol, 2.3 g) and benzaldehyde derivatives **SM-2** (1.0 equiv, 10 mmol) in toluene (40 mL) was placed in a Dean-Stark apparatus which was heated to reflux. Piperidine (2.0 equiv, 100 mmol, 9.9 mL) was added dropwise slowly. Then, the temperature was raised to 140 °C and stirred for 12 h. After that, the reaction mixture was cooled to 120 °C and acetic anhydride (2.0 equiv, 100 mmol, 9.4 mL) was added dropwise. The stirring was continued for 30 min and the solution was poured in icewater and extracted with EtOAc (3 x 100 mL). The organic phases were washed with brine and dried over anhydrous Na<sub>2</sub>SO<sub>4</sub>. Then the solvent was evaporated under reduced pressure to obtain the corresponding products **SM-4** after flash column chromatography (Hexane/EtOAc = 99/1).

To a solution of **SM-4** (1.0 equiv, 5 mmol) in THF (10 mL/mmol) at 0 °C was added TBAF (1.1 equiv, 1M in THF). The reaction mixture was stirred for 15 min at room temperature. Then saturated NH<sub>4</sub>Cl solution was added dropwise to the reaction. The resulting solution was extracted with EtOAc (2 x 20 mL). Then the combined organic phase was washed with brine and dried over anhydrous Na<sub>2</sub>SO<sub>4</sub>. The solvent was removed to give the crude product which was purified by flash column chromatography (Hexane/EtOAc = 90/10) to afford the desired *ortho*-hydroxy *para*-quinone methide (*p*-QM) derivatives **1a-1g**.<sup>1</sup>

2,6-di-*tert*-butyl-4-(2-hydroxybenzylidene)cyclohexa-2,5-dien-1-one derivatives

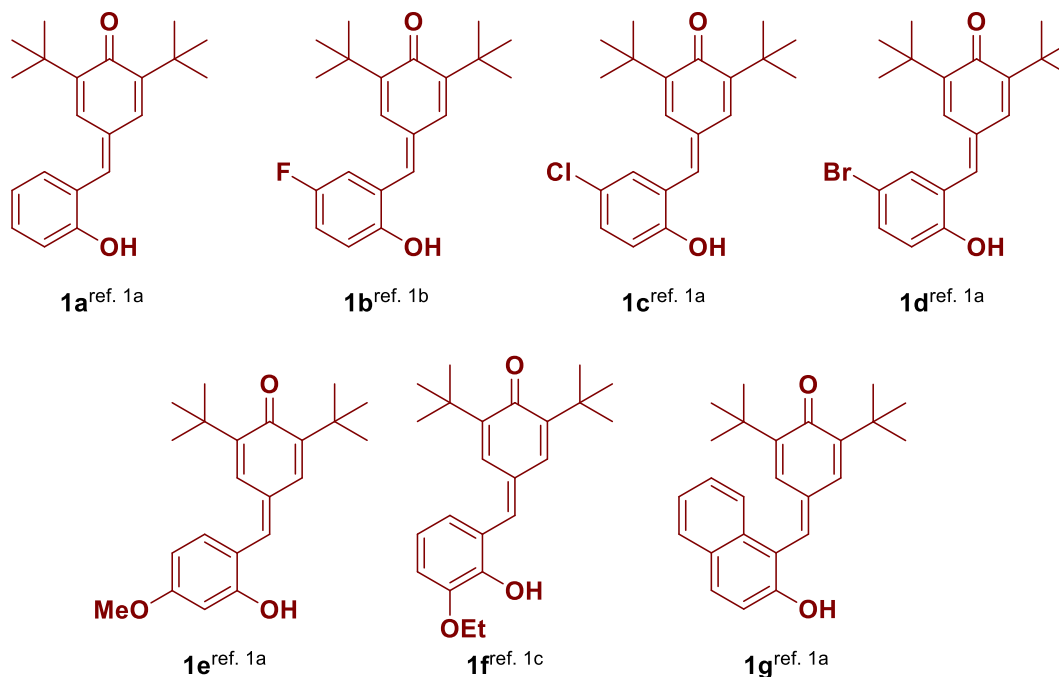

## 1.2. Synthesis of halo substituted allyl derivatives 2:

### 1.2.1. Synthesis of $\gamma$ -bromocrotonoate derivatives [2a, 2c, 2f and 2j]:<sup>2</sup>

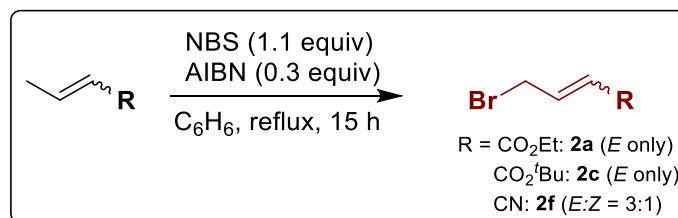

To a solution of crotonate/crotononitrile (1 equiv, 10 mmol), AIBN (0.3 equiv, 3 mmol, 492 mg) and *N*-bromosuccinimide (1.1 equiv, 11 mmol, 1.96 g) in benzene (50 mL) was stirred at reflux for 15 h under a nitrogen atmosphere. The mixture was allowed to cool to room temperature. The resulting mixture was filtered. The filtrate was washed with water (2 x 50 mL) and brine (50 mL), and dried over anhydrous Na<sub>2</sub>SO<sub>4</sub>. The filtrate was concentrated under reduced pressure. The residue was purified by silica gel column chromatography, using Hexane/EtOAc (90:10) as eluent to afford  $\gamma$ -bromo crotonate/ $\gamma$ -bromo crotononitrile derivatives **2a**, **2c**, **2f** and **2j**.<sup>2</sup>

### 1.2.2. Phenyl/benzyl (*E*)-4-bromobut-2-enoate **2d-2e**:<sup>3a</sup>

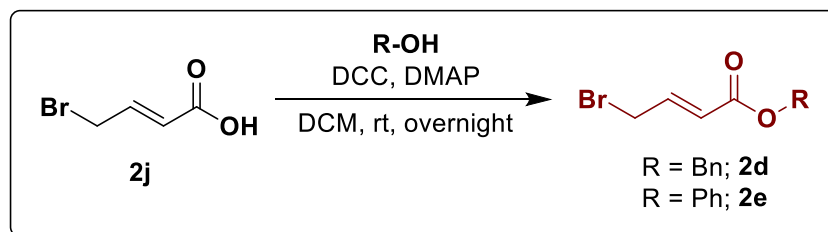

To a solution of 4-bromocrotonic acid **2j** (1.0 equiv, 10 mmol, 1.64 g) in DCM (40 mL) was added phenol/benzyl alcohol (1.1 equiv, 11 mmol) and DMAP (0.1 equiv, 1 mmol, 122 mg). The solution was cooled to 0 °C, then DCC (1.05 equiv, 10.5 mmol, 2.16 g) was added portion wise. The reaction mixture was allowed to warm to rt and stirred overnight. The reaction mixture was filtered through a short celite-pad and the residue was washed with DCM (2 x 20 mL). The combined organic extract was dried over Na<sub>2</sub>SO<sub>4</sub> and concentrated under reduced pressure. The residue was purified by flash column chromatography (Hexane: EtOAc = 20:80) to give the corresponding crotonates **2d-2e**.

### 1.2.3. Synthesis of (*E*)-4-bromo-1-morpholinobut-2-en-1-one **2g**:<sup>3b</sup>

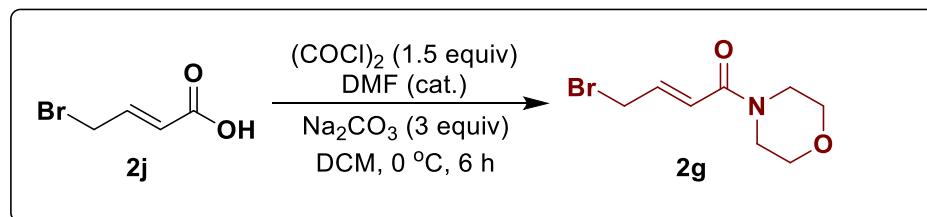

To a solution of (*E*)-4-bromobut-2-enoic acid **2d** (1 equiv, 3 mmol, 500 mg) in DCM (10 mL) under N<sub>2</sub> atmosphere at 0 °C. Then oxalyl chloride (1.5 equiv, 4.5 mmol, 571 mg) and DMF (0.1 mL) were added. The solution was stirred at 0 °C under N<sub>2</sub> atmosphere for 2 h, followed by the addition of Na<sub>2</sub>CO<sub>3</sub> (3 equiv, 9 mmol, 954 mg) and morpholine (1.5 equiv, 4.5 mmol, 10.4 mL). The resulting reaction mixture1 was stirred at 0 °C for 6 h. To the reaction mixture were added water (10 mL) and DCM (10 mL). The resultant mixture was extracted with DCM (2 x 30 mL). The combined organic phase was dried over anhydrous Na<sub>2</sub>SO<sub>4</sub>, purified by column chromatography (Hexane/Ethyl acetate = 70:30) to obtain the title compound **2g** as a white solid (358 mg, 67% yield).<sup>3b</sup>

#### 1.2.4. Synthesis of (*E*)-((3-bromoprop-1-en-1-yl)sulfonyl)benzene derivatives **2h-2i**:<sup>3c</sup>

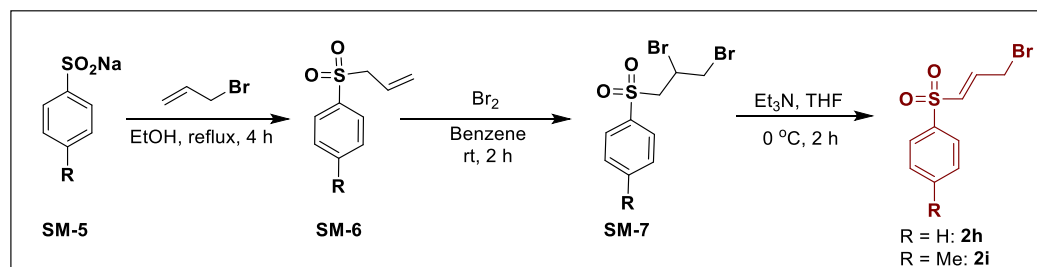

To a solution of substituted sodium benzenesulfinate **SM-5** (1 equiv, 10 mmol) in ethanol (40 mL) was added 3-bromoprop-1-ene (1.2 equiv, 12 mmol, 1.04 mL) under argon atmosphere. The reaction mixture was refluxed for 4 h and then the solvent was removed. The residue was added to water (30 mL) and then extracted with CH<sub>2</sub>Cl<sub>2</sub> (3x10 mL). The combined organic phase were washed with brine, dried over anhydrous Na<sub>2</sub>SO<sub>4</sub>, and concentrated. The crude residue **SM-6** was used in the next step directly without further purification.

To a solution of **SM-6** (1 equiv, 10 mmol) in benzene (15 mL) was added a solution of Br<sub>2</sub> (1. equiv, 11 mmol, 0.57 mL) in benzene (5 mL) dropwise. The reaction mixture was stirred at room temperature for 2 h. After the completion of the reaction, the reaction mixture was quenched with saturated aqueous NaHSO<sub>3</sub> solution and then extracted with CH<sub>2</sub>Cl<sub>2</sub> (3 x 30 mL). The combined organic phase was washed with brine, dried over anhydrous Na<sub>2</sub>SO<sub>4</sub> and concentrated. The crude product **SM-7** was used in the next step without further purification.

Et<sub>3</sub>N (1.1 equiv, 5.5 mmol) was added dropwise to a stirred solution of **SM-7** (1 equiv, 5 mmol) in dry THF (30 mL) at 0 °C. The reaction mixture was stirred at the same temperature for 2 h. After completion of the reaction, the solvent was removed. The residue was added to water (25 mL) and then extracted with CH<sub>2</sub>Cl<sub>2</sub> (3 x 30 mL). The combined organic phase was washed with brine, dried over anhydrous Na<sub>2</sub>SO<sub>4</sub>, and concentrated. The crude product was purified by flash chromatography (Hexane/Ethyl acetate = 30:1) to give the desired compounds **2h-2i**.<sup>3c</sup>

### 1.3. General procedure for the synthesis of **6a-6i**:<sup>4</sup>

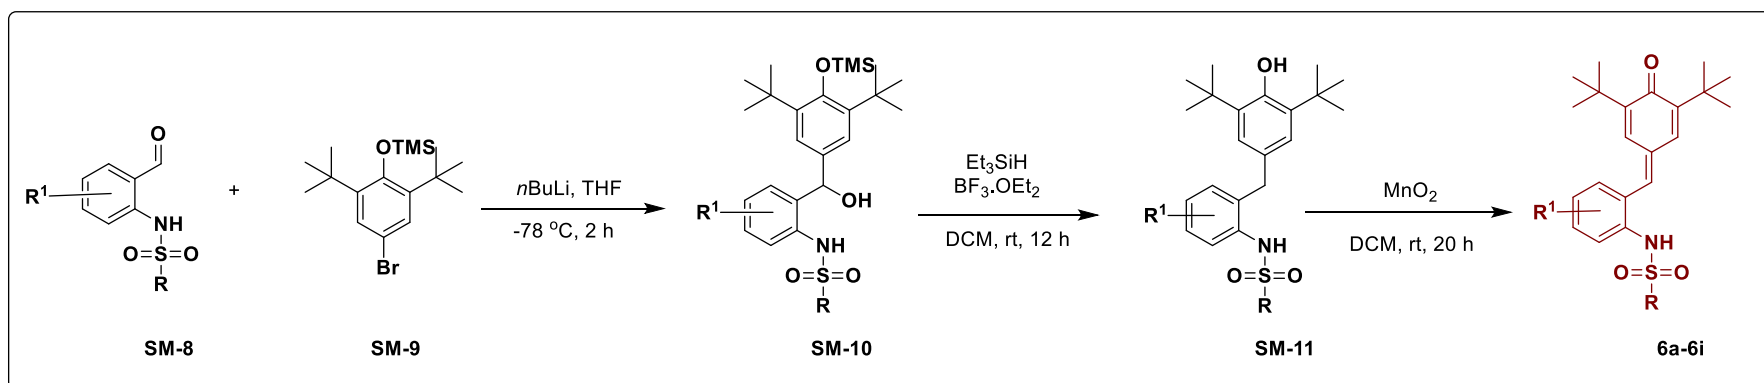

To a solution of (4-bromo-2,6-di-*tert*-butylphenoxy)trimethylsilane **SM-9** (1 equiv, 5 mmol, 1.78 g) in anhydrous THF (25 mL) at -78 °C was added *n*-butyllithium 2.5 M (1.2 equiv, 6 mmol, 2.4 mL) slowly in a dropwise manner. After finishing the addition, the reaction mixture was stirred at the same temperature for 30 min. Then, a solution of aldehyde **SM-8** (1.2 equiv, 6 mmol) in anhydrous THF (5 mL) was dropwise added. The reaction mixture was stirred at -78 °C for 2 h and saturated NH<sub>4</sub>Cl solution was added to quench the reaction. Then the resulting solution was extracted with Et<sub>2</sub>O (3 x 30 mL). The combined organic phase was dried over anhydrous Na<sub>2</sub>SO<sub>4</sub> and the solvent was removed under reduced pressure to obtain the crude **SM-10**, which was directly used in the next step without further purification.

To a solution of substrate **SM-10** (1 equiv, 5 mmol) and triethylsilane (1.5 equiv, 7.5 mmol, 1.2 mL) in CH<sub>2</sub>Cl<sub>2</sub> (25 mL) at 0 °C under nitrogen atmosphere was slowly added boron trifluoride etherate (1.5 equiv, 7.5 mmol, 0.89 mL). The reaction mixture was stirred at room temperature overnight, and then the reaction was quenched with saturated aqueous NaHCO<sub>3</sub> and stirred for 30 minutes. The resulting solution was extracted

with EtOAc (3 x 30 mL). Then the combined organic phase was washed with brine and dried over anhydrous  $\text{Na}_2\text{SO}_4$ . The solvent was removed to give the crude product which was purified by silica gel flash chromatography (Hexane:EtOAc = 90:10) to give compounds **SM-11**.

A 25 mL glass tube equipped with a stirring bar was charged with the precursors **SM-11** (1equiv, 1 mmol),  $\text{MnO}_2$  (5 equiv, 5 mmol, 435 mg), and  $\text{CH}_2\text{Cl}_2$  (5 mL). The resulting solution was stirred at room temperature for 20 h. Then the solvent was evaporated under reduced pressure to give a residue, which was directly purified by flash column chromatography (Hexane:EtOAc = 85:15) to provide *p*-QMs **6a-6i** as a yellow solids.<sup>4</sup>

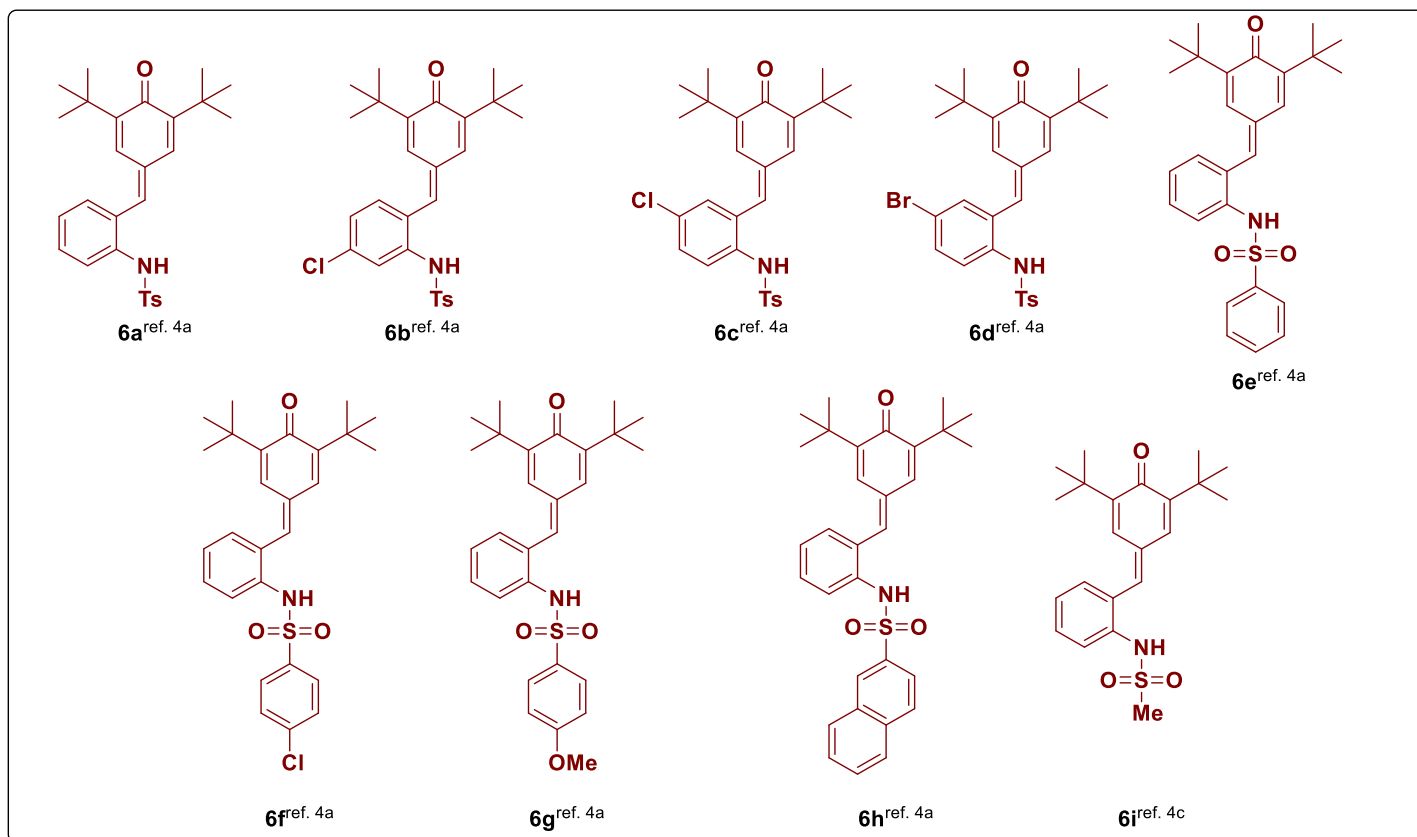

## 2. Step-wise and one-pot reactions of *p*-QM **1a** and ethyl 4-bromocrotonoate **2a**

### 2.1. Sequential reaction of **1a** and **2a**:

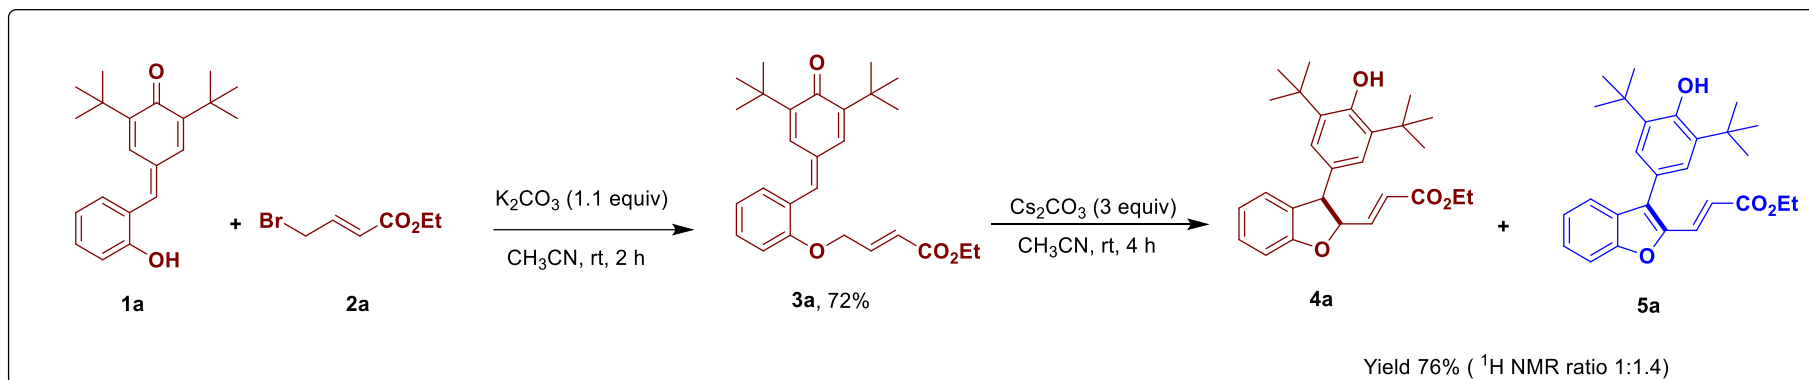

To a 15 mL clean and dry screw cap vial, a mixture of *p*-QM **1a** (1 equiv, 1 mmol, 310 mg) and anhydrous  $K_2CO_3$  (1.1 equiv, 1.1 mmol, 152 mg) and  $CH_3CN$  (10 mL) were added and the reaction mixture was stirred at 0 °C for 15 min. To this reaction mixture was added a solution of ethyl 4-bromobut-2-enoate **2a** (1.3 equiv, 1.3 mmol, 0.18 mL) in  $CH_3CN$  (5 mL) dropwise over 10 min, the temperature of the reaction mixture was maintained at 0 °C during addition. After complete addition, the reaction mixture was allowed to stir at 0 °C for 2 h. After the of the reaction, the reaction mixture was concentrated under reduced pressure. The resulting residue was extracted with EtOAc (2 x 20 mL) the combined organic phase was washed with water (20 mL) and dried over anhydrous  $Na_2SO_4$  and filtered. The organic phase was concentrated under reduced pressure. The crude residue was purified by column chromatography on silica gel to afford the desired product **3a** in 72% yield.

To a 15 mL clean and dry screw cap vial,  $Cs_2CO_3$  (3 equiv, 1.5 mmol, 489 mg) was added followed by a solution of *para*-quinone methide-allyl derivative **3a** (1 equiv, 0.5 mmol, 211 mg) in  $CH_3CN$  (5 mL). The reaction vial was closed and the reaction mixture was allowed to stir at room

temperature for 4 h. The reaction mixture was quenched with water (10 mL), diluted with EtOAc (20 mL), and washed with water (10 mL) and brine (10 mL). Then the organic extract was dried over anhydrous Na<sub>2</sub>SO<sub>4</sub>, filtered, and concentrated under reduced pressure. The resulting residue was purified by column chromatography on silica gel to afford a mixture of compounds **4a** and **5a** in a 1:1.4 ratio.

## 2.2. One pot reaction of **1a** and **2a** followed by oxidation to access 2-alkenyl benzofuran **5a**:

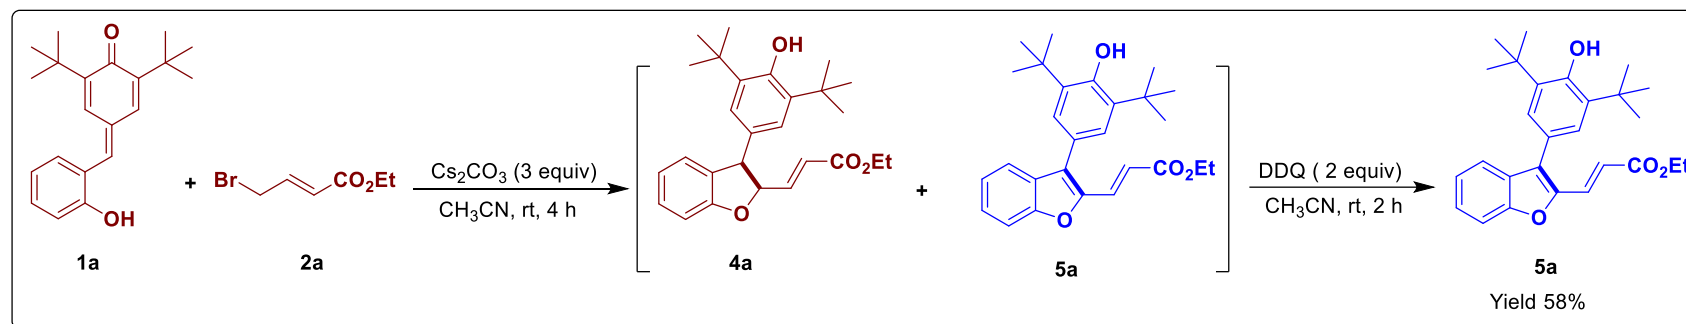

To a solution of *p*-QM **1a** (1 equiv, 0.5 mmol, 155 mg) in dry CH<sub>3</sub>CN (4 mL) was added anhydrous Cs<sub>2</sub>CO<sub>3</sub> (3 equiv, 1.5 mmol, 489 mg) followed by 4-bromobut-2-enoate **2a** (1.3 equiv, 0.65 mmol, 125 mg) in CH<sub>3</sub>CN (5 mL) was added. Then, the reaction mixture was allowed stir at rt for 4 h. Followed by DDQ (2 equiv, 1 mmol, 227 mg) was added. This reaction mixture stirred for 2 h. The reaction mixture was quenched with water (10 mL), diluted with EtOAc (20 mL) the resulting mixture was washed with water (10 mL) and brine (10 mL). Then the organic extract was dried over anhydrous Na<sub>2</sub>SO<sub>4</sub>, filtered, and concentrated under reduced pressure. The resulting residue was purified by column chromatography on silica gel to afford benzofuran **5a** in 58% yield.

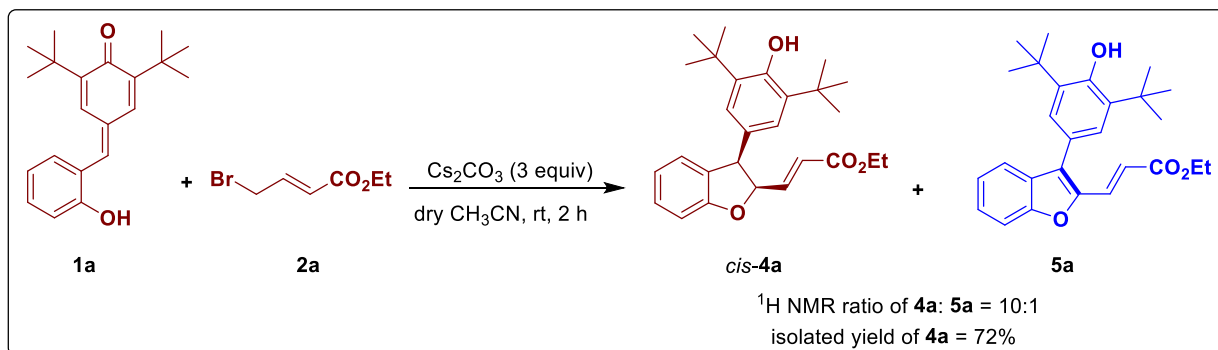

To a solution of *p*-QM **1a** (1 equiv, 0.5 mmol, 155 mg) in dry  $\text{CH}_3\text{CN}$  (5 mL) were added anhydrous  $\text{Cs}_2\text{CO}_3$  (3 equiv, 1.5 mmol, 489 mg) and 4-bromobut-2-enoate **2a** (1.3 equiv, 0.65 mmol, 125 mg) in dry acetonitrile (5 mL) under argon atmosphere. After the addition, the reaction mixture was allowed to stir at rt for 2 h. After this time, the reaction mixture was concentrated under reduced pressure. The resulting residue was extracted with EtOAc (2 x 20 mL) the combined organic phase was washed with water (20 mL) and dried over anhydrous  $\text{Na}_2\text{SO}_4$ , filtered, and concentrated under reduced pressure. The crude residue was purified by column chromatography on silica gel to afford the desired dihydrobenzofuran **4a** in 72% yield. The relative configuration of *cis*-dihydrobenzofuran **4a** was confirmed by NOE.

### 2.3. Conversion of **4a** to **5a** by using the oxidant DDQ:

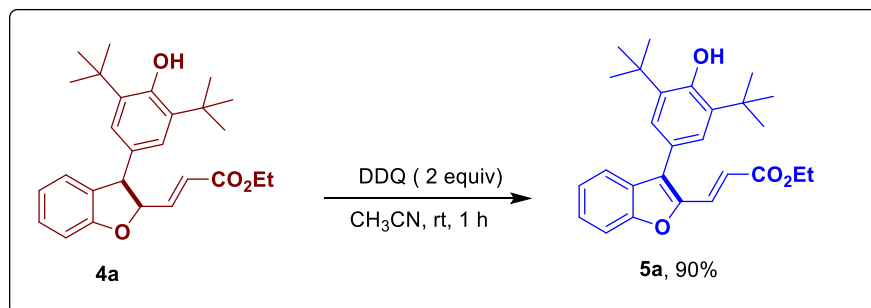

To a 15 mL clean and dry screw cap vial, a solution of ethyl (*E*)-3-(3-(3,5-di-*tert*-butyl-4-hydroxyphenyl)-2,3-dihydrobenzofuran-2-yl)acrylate **4a** (1 equiv, 0.25 mmol, 106 mg) in acetonitrile (3 mL) followed by DDQ (2 equiv, 0.5 mmol, 113 mg) was added. The reaction mixture was stirred at room temperature for 2 h. To this reaction mixture were added water (5 mL), and EtOAc (5 mL). The resulting mixture was extracted with EtOAc (2 x 10 mL). Then the combined organic phase was washed with water (5 mL) and brine (5 mL). The organic extract was dried over anhydrous Na<sub>2</sub>SO<sub>4</sub>, filtered and concentrated under reduced pressure. The resulting residue was purified by column chromatography on silica gel to afford 2-alkenyl benzofuran **5a** in 90% yield.

### 3. General experimental procedure for the optimization study

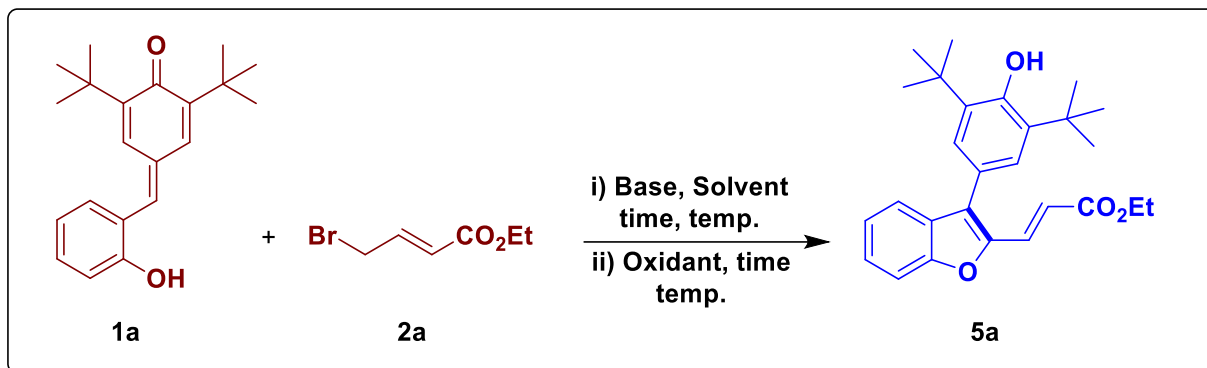

To a 15 mL clean and dry screw cap vial, *p*-QMs **1** (0.5 equiv, 0.5 mmol),  $\gamma$ -halo substituted activated allyl derivative **2** (1.3 equiv, 0.65 mmol) and solvent (5 mL) were added followed by base (3 equiv). The reaction mixture was allowed to stir at the indicated time and temperature. Upon completion of the starting material, the oxidant (2 equiv, 1 mmol) was added and the reaction contents were allowed to stir at the indicated time and temperature. To the cooled reaction mixture were added water (5 mL) and EtOAc (5 mL). The resulting mixture was extracted with EtOAc (2 x 10 mL). Then the combined organic phase was washed with water (5 mL) and brine (5 mL). The organic extract was dried over anhydrous Na<sub>2</sub>SO<sub>4</sub>, filtered and concentrated under reduced pressure to give a crude residue. The resulting residue was purified by column chromatography using ethyl acetate in hexane as eluent to isolate the products **5a** and **3a**.

**Note:** please see tables T1-T5, for a screening of various bases, solvents, leaving group and their ratios/quantities, time and temperature reaction conditions

## 4. Optimization survey

Table T1: Screening of various bases

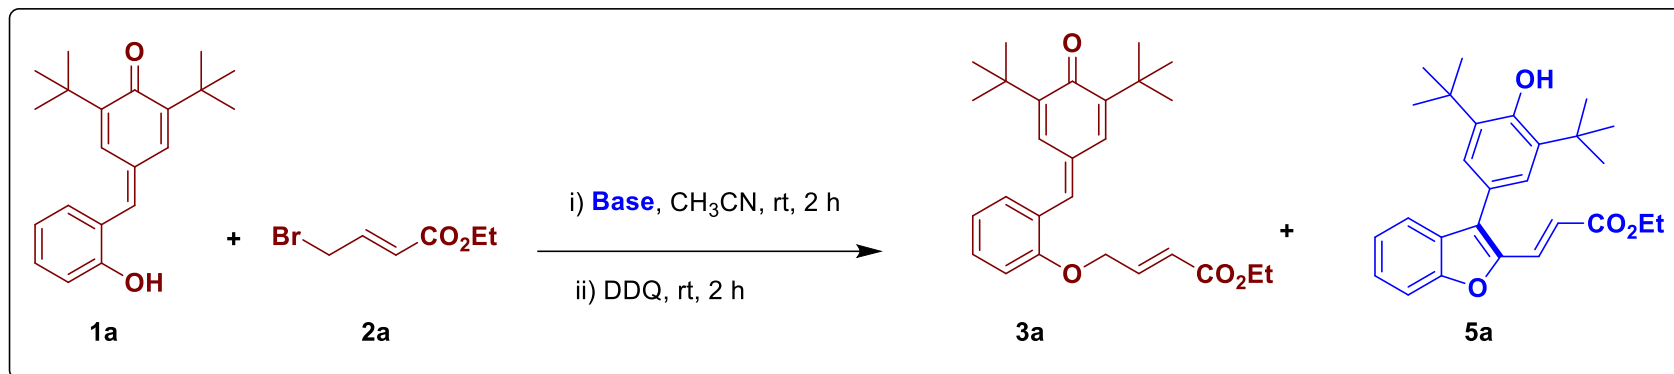

| Entry | Base (3 equiv)                            | % Yield of 3a | % Yield of 5a |
|-------|-------------------------------------------|---------------|---------------|
| 1     | K <sub>2</sub> CO <sub>3</sub>            | 76            | -             |
| 2     | K <sub>3</sub> PO <sub>4</sub>            | 56            | -             |
| 3     | Cs <sub>2</sub> CO <sub>3</sub>           | -             | <b>76</b>     |
| 4     | 1,4-Diazabicyclo[2.2.2]octane (DABCO)     | 75            | -             |
| 5     | 1,5,7-Triazabicyclo[4.4.0]dec-5-ene (TBD) | trace         | 14            |
| 6     | NaH                                       | trace         | -             |
| 7     | 1,8-Diazabicyclo[5.4.0]undec-7-ene (DBU)  | -             | 32            |
| 8     | KO <sup>t</sup> Bu                        | -             | 29            |
| 9     | NaOH                                      | 65            | Trace         |
| 10    | Et <sub>3</sub> N                         | -             | -             |
| 11    | -                                         | -             | -             |

**Table S2: Screening of various Solvents and leaving group (X)**

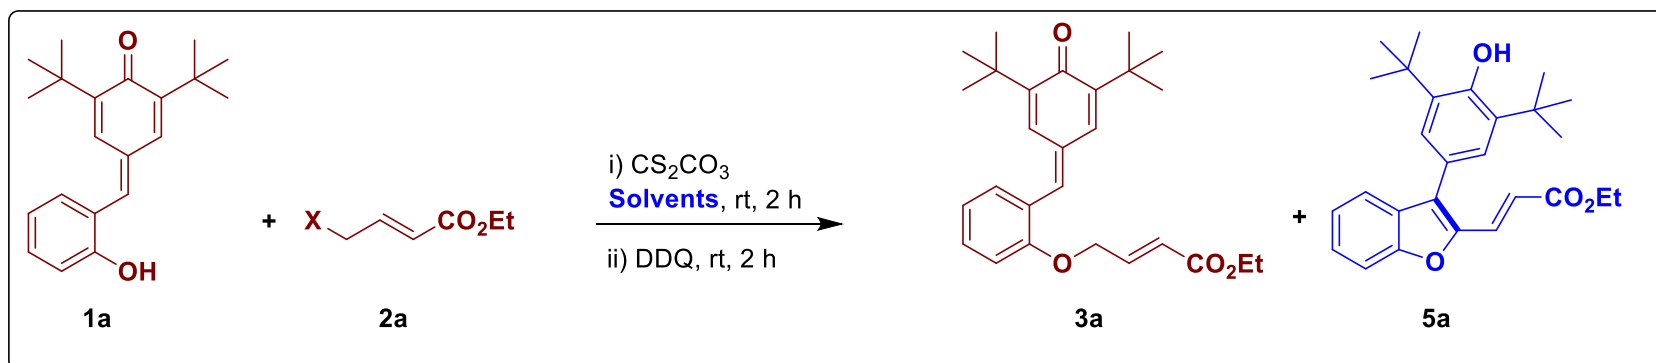

| Entry | Solvents (5 mL)           | Leaving Group (X) | % Yield of 3a | % Yield of 5a |
|-------|---------------------------|-------------------|---------------|---------------|
| 1.    | CH <sub>3</sub> CN        | Br                | -             | 76            |
| 2.    | Dimethyl sulfoxide (DMSO) | Br                | 29            | 20            |
| 3.    | Toluene                   | Br                | 24            | -             |
| 4.    | EtOH                      | Br                | -             | 25            |
| 5.    | 1,4-Dioxane               | Br                | trace         | -             |
| 6.    | Tetrahydrofuran (THF)     | Br                | -             | 32            |
| 7.    | Dimethylformamide (DMF)   | Br                | -             | 48            |
| 8.    | Water                     | Br                | NR            | NR            |
| 9.    | CH <sub>3</sub> CN        | Cl                | -             | 42            |
| 10.   | CH <sub>3</sub> CN        | I                 | -             | 58            |
| 11.   | CH <sub>3</sub> CN        | OBoc              | -             | 34            |

In DCM and DCE solvents the starting materials were found to be decomposed

Table T3: Optimization of oxidant

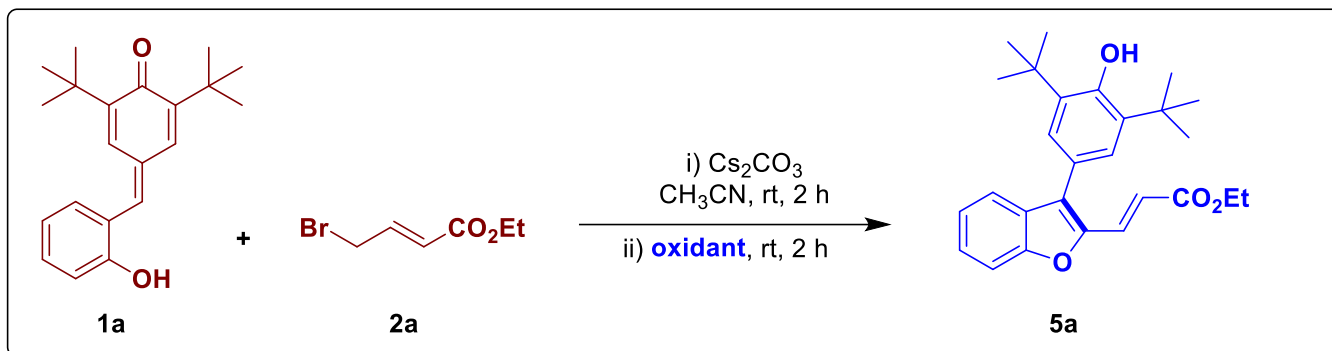

| Entry | Oxidant (2 equiv)                                                                   | % Yeld of 5a |
|-------|-------------------------------------------------------------------------------------|--------------|
| 1     | (Diacetoxyiodo)benzene                                                              | 20%          |
| 2     | 3,3',5,5'-Tetra-tert-butyl-[1,1'-bi(cyclohexylidene)]-2,2',5,5'-tetraene-4,4'-dione | Trace        |
| 3     | $\text{MnO}_2$                                                                      | 28%          |
| 4     | DDQ                                                                                 | 76%          |

Table T4: Optimization of amount of base and oxidant

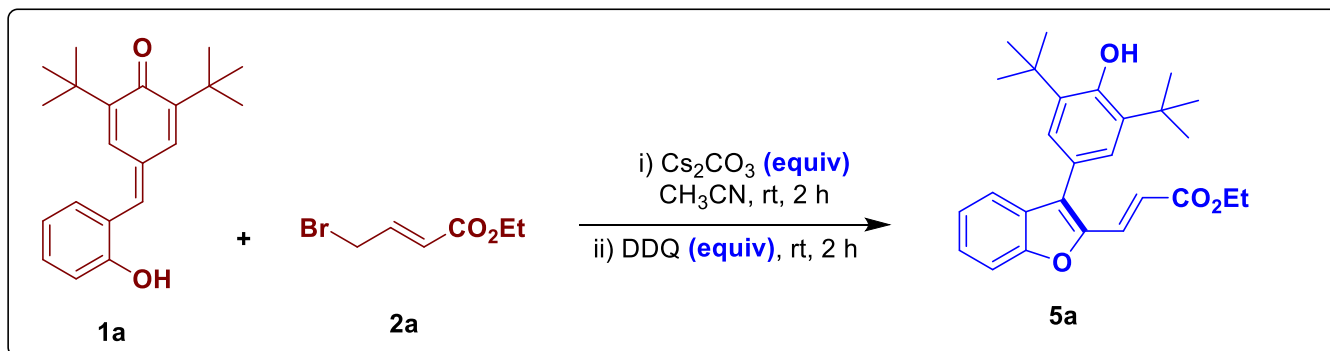

| Entry. | $\text{Cs}_2\text{CO}_3$ (equiv) | DDQ (equiv) | % Yield of <b>5a</b> |
|--------|----------------------------------|-------------|----------------------|
| 1      | 5                                | 2           | 68                   |
| 2      | <b>3</b>                         | <b>2</b>    | <b>76</b>            |
| 3      | 1                                | 2           | NR                   |
| 4      | 3                                | 1           | 68                   |

Table T5: Optimization of Time and Temp.

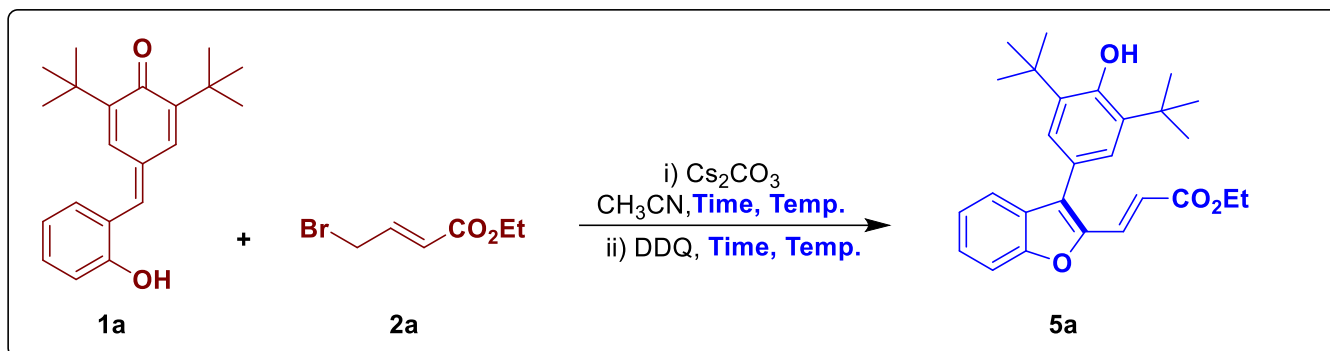

| Entry. | Temp  | Time (h) | % Yield of 5a |
|--------|-------|----------|---------------|
| 1      | rt    | 1+2      | 48            |
| 2      | rt    | 2+2      | 76            |
| 3      | rt    | 2+1      | 80            |
| 4      | 50 °C | 2+1      | 62            |

## 5. Experimental procedure for the gram-scale syntheses of **5a** and **5i**

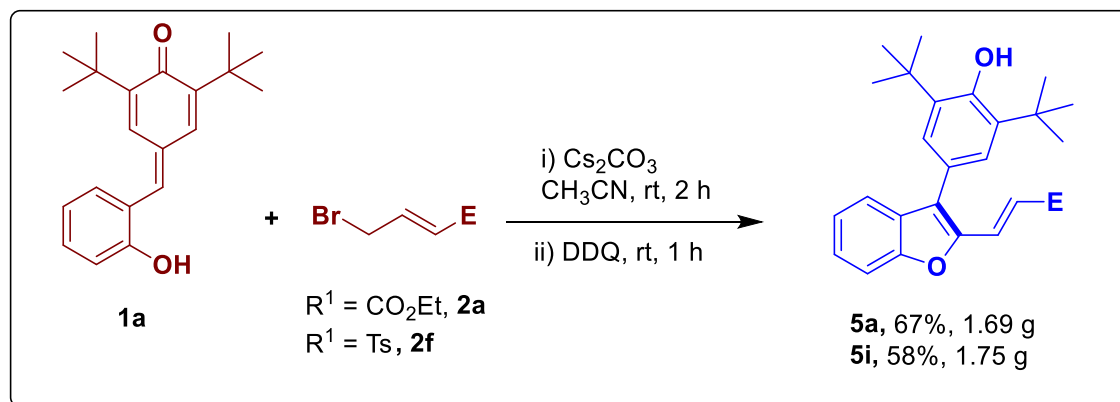

To a clean and oven-dried 100 mL round bottom flask were added *p*-QM **1a** (1 equiv, 6 mmol, 1.86 g) and ethyl (*E*)-4-bromobut-2-enoate **2a** (1.3 equiv, 7.8 mmol, 1.07 mL) (or) (*E*)-1-((3-bromoprop-1-en-1-yl)sulfonyl)-4-methylbenzene **2f** (1.3 equiv, 7.8 mmol, 2.14 g), CH<sub>3</sub>CN (30 mL) and Cs<sub>2</sub>CO<sub>3</sub> (3 equiv, 18 mmol, 5.89 g). The reaction was stirred at room temperature for 2 h. Subsequently, DDQ (2 equiv, 12 mmol, 2.72 g) was added to the reaction mixture was allowed to stir at the same temperature for 1 h. To this reaction mixture were added water (30 mL) and EtOAc (30 mL). The resulting mixture was extracted with EtOAc (2 x 50 mL). Then the combined organic phase was washed with water (30 mL) and brine (30 mL). The organic extract was dried over anhydrous Na<sub>2</sub>SO<sub>4</sub>, filtered and concentrated under reduced pressure to give a crude residue. The resulting residue was purified by column chromatography on silica gel to afford substituted benzofuran derivative **5a** (or) **5i** in 67% (or) 58% yield, respectively.

## 6. Control experiments and mechanistic studies

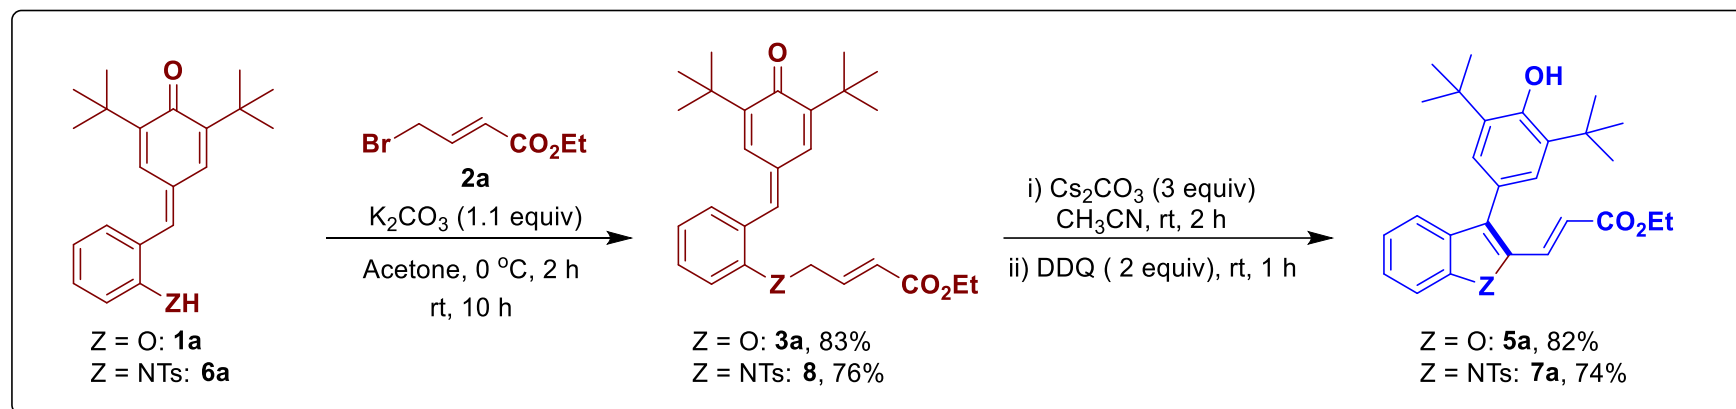

To a clean and oven dried round bottom flask (10 mL) were added *p*-QM **1a** (or) **6a** (1 equiv, 1 mmol), anhydrous  $K_2CO_3$  (1.1 equiv, 1.1 mmol, 152 mg) and dry acetone (10 mL). The reaction mixture was stirred at 0 °C for 15 min. To this reaction mixture was added a solution of ethyl 4-bromobut-2-enoate **2a** (1.3 equiv, 1.3 mmol, 0.18 mL) in acetone (3 mL) dropwise over 10 min the temperature of the reaction mixture was maintained at 0 °C during the addition. After the addition, the reaction mixture was allowed to stir at 0 °C for 2 h, then at room temperature for another period of 10 h. After this time, the reaction mixture was concentrated under reduced pressure. The resulting residue was extracted with EtOAc (2 x 20 mL). The combined organic phase was washed with water (20 mL), 2 N NaOH solution (10 mL), brine (5 mL), dried over anhydrous  $Na_2SO_4$ , filtered and concentrated under reduced pressure. The crude residue was purified by column chromatography on silica gel to afford the desired products **3a** (or) **8** in 83% (or) 76% yield, respectively.

To a 15 mL clean and dry screw cap vial,  $Cs_2CO_3$  (3 equiv, 1.5 mmol, 489 mg) was added followed by the addition of a solution of *para*-quinone methide-allylcinnamate derivative **3a** (or) **8** (0.5 equiv, 0.5 mmol) in  $CH_3CN$  (5 mL). The reaction vial was closed and allowed to stir, at room temperature for 2 h. Subsequently, DDQ (2 equiv, 1 mmol, 227 mg) was added to the reaction mixture at the same temperature for and allowed

the reaction mixture to stir for 1 h. To this reaction mixture were added water (5 mL) and EtOAc (5 mL). The resulting mixture was extracted with EtOAc (2 x 10 mL). Then the combined organic phase was washed with water (5 mL) and brine (5 mL). The organic extract was dried over anhydrous Na<sub>2</sub>SO<sub>4</sub>, filtered and concentrated under reduced pressure. The resulting residue was purified by column chromatography on silica gel to afford 2-alkenyl benzofuran **5a** (or) 2-alkenylindole **7a** in 82% (or) 74% yield, respectively.

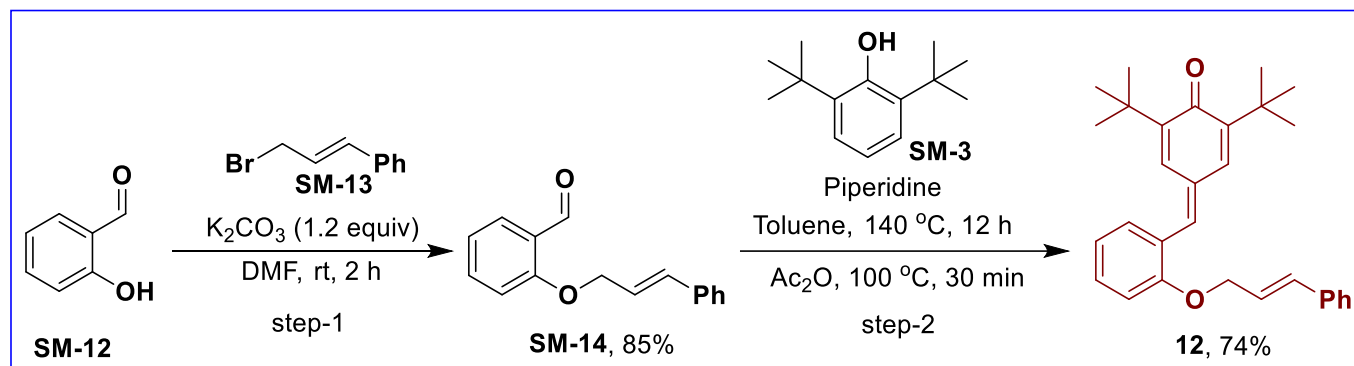

**Step-1:** In a reaction vial, to a solution of salicylaldehyde **SM-12** (1 equiv, 5 mmol, 0.52 mL) with cinnamyl bromide **SM-13** (1.2 equiv, 6 mmol, 0.89 mL) in DMF (10 mL) was added a suspension of  $K_2CO_3$  (1.2 equiv, 6 mmol, 828 mg) in DMF (20 mL) at room temperature and the reaction mixture was stirred for 2 h. To the reaction mixture were added water (20 mL) and EtOAc (20 mL). The resulting mixture was extracted with EtOAc (2 x 30 mL). Then the combined organic phase was washed with water (20 mL) and brine (20 mL). The organic extract was dried over anhydrous Na<sub>2</sub>SO<sub>4</sub>, filtered and concentrated under reduced pressure. The resulting residue was purified by column chromatography on silica gel to afford the O-allylated derivative **SM-14** in 85% yield.<sup>5</sup>

**Step-2:** A solution of phenol **SM-3** (1.1 equiv, 4.4 mmol) and aldehyde **SM-14** (1 equiv, 4 mmol) in toluene (16 mL) was placed in a Dean-Stark apparatus which was heated to reflux. Piperidine (2 equiv, 8 mmol) was added slowly in a dropwise manner. Then, the temperature was raised to 140 °C and stirred for 12 h. After that, the reaction mixture was cooled to 120 °C and acetic anhydride (2.0 equiv, 8 mmol) was dropwise added.

The stirring was continued for 30 min and the solution was poured in ice-water and extracted with EtOAc (3 x 20 mL). The organic phases were combined, washed with brine and dried over anhydrous Na<sub>2</sub>SO<sub>4</sub>. Then the solvent was evaporated under reduced pressure to afford the corresponding *p*-QM **12** after flash column chromatography (Hexane/EtOAc = 95/5).

Spectral data for compound **12**: Yellow solid, 315 mg (0.74 mmol), 74%, *R*<sub>f</sub> = 0.4 (EtOAc/Hex, 10:90); **MP** 193-195 °C; **IR** (CHCl<sub>3</sub>) 2999, 2956, 2863, 1639, 1615, 1487, 1457, 1364 cm<sup>-1</sup>; **<sup>1</sup>H-NMR** (400 MHz, CDCl<sub>3</sub>) δ 7.50 – 7.45 (m, 2H), 7.44 – 7.38 (m, 3H), 7.37 – 7.32 (m, 2H), 7.28 (dt, *J* = 4.9, 1.9 Hz, 1H), 7.10 (d, *J* = 2.3 Hz, 1H), 7.04 (dd, *J* = 17.1, 7.9 Hz, 2H), 6.74 (d, *J* = 16.0 Hz, 1H), 6.44 (dt, *J* = 16.0, 5.8 Hz, 1H), 4.79 (dd, *J* = 5.8, 1.3 Hz, 2H), 1.35 (s, 9H), 1.29 (s, 9H); **<sup>13</sup>C{<sup>1</sup>H}NMR** (101 MHz, CDCl<sub>3</sub>) δ 186.7, 157.4, 149.0, 147.4, 138.9, 136.2, 135.4, 133.4, 132.0, 131.7, 130.8, 128.7, 128.4, 128.1, 126.6, 126.0, 125.4, 124.1, 120.8, 112.3, 69.3, 35.4, 35.1, 29.6; **MS** (ESI, *m/z*): [M+Na]<sup>+</sup> 449.

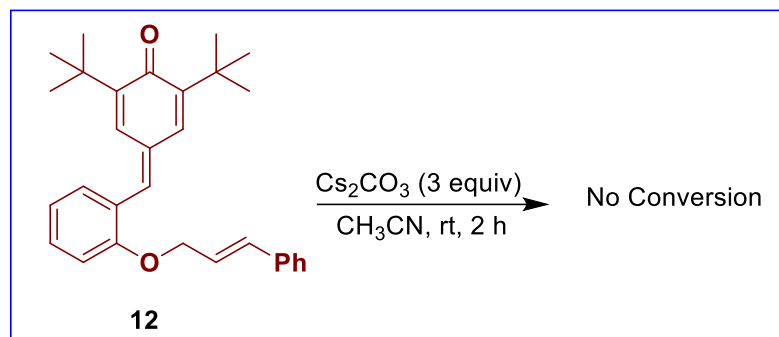

To a 15 mL clean screw cap vial, Cs<sub>2</sub>CO<sub>3</sub> (3 equiv, 1.5 mmol, 489 mg) was added followed by a solution of *p*-QM **10** (0.5 equiv, 0.5 mmol, 213 mg) in a CH<sub>3</sub>CN (5 mL). The reaction vial was closed and the reaction mixture was allowed to stir at room temperature for 2 h. The reaction was monitoring by TLC and found that starting material remained unreacted.

### Cross-over experiments:

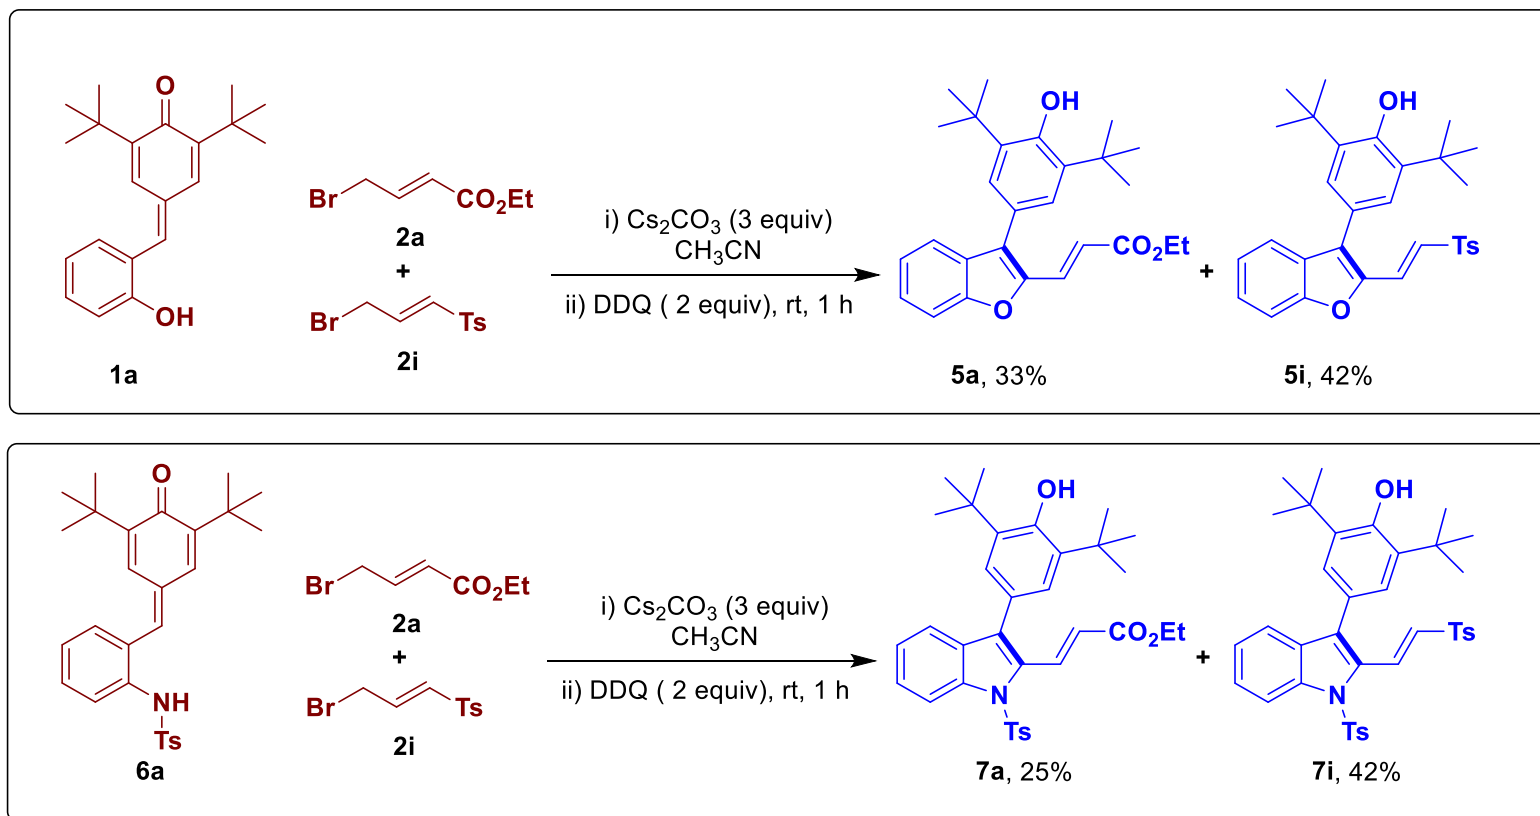

In a 15 mL clean and dry screw cap vial, *p*-QM **1a** (or) **6a** (1 equiv, 0.5 mmol), ethyl (*E*)-4-bromobut-2-enoate **2a** (1 equiv, 0.5 mmol, 96 mg) and (*E*)-1-((3-bromoprop-1-en-1-yl)sulfonyl)-4-methylbenzene **2f** (1 equiv, 0.5 mmol, 137 mg) in CH<sub>3</sub>CN (5 mL) were taken followed by the addition of Cs<sub>2</sub>CO<sub>3</sub> (3 equiv, 1.5 mmol, 489 mg). The reaction mixture was stirred at room temperature for 2 h. Subsequently, DDQ (2 equiv, 1 mmol, 227 mg) was added to the reaction mixture at the same temperature and the reaction mixture was allowed to stir for 1 h. To the reaction mixture were added water (10 mL) and EtOAc (10 mL). The resulting mixture was extracted with EtOAc (2 x 10 mL). Then the combined organic phase was washed with water (10 mL) and brine (5 mL). The organic extract was dried over anhydrous Na<sub>2</sub>SO<sub>4</sub>, filtered and concentrated under reduced pressure to give a

crude residue. The resulting residue was purified by column chromatography on silica gel to afford the substituted benzofuran derivatives **5a** and **5i** in 33% and 45% yield, respectively (or) indole derivatives **7a** and **7i** in 25% and 42% yield, respectively.

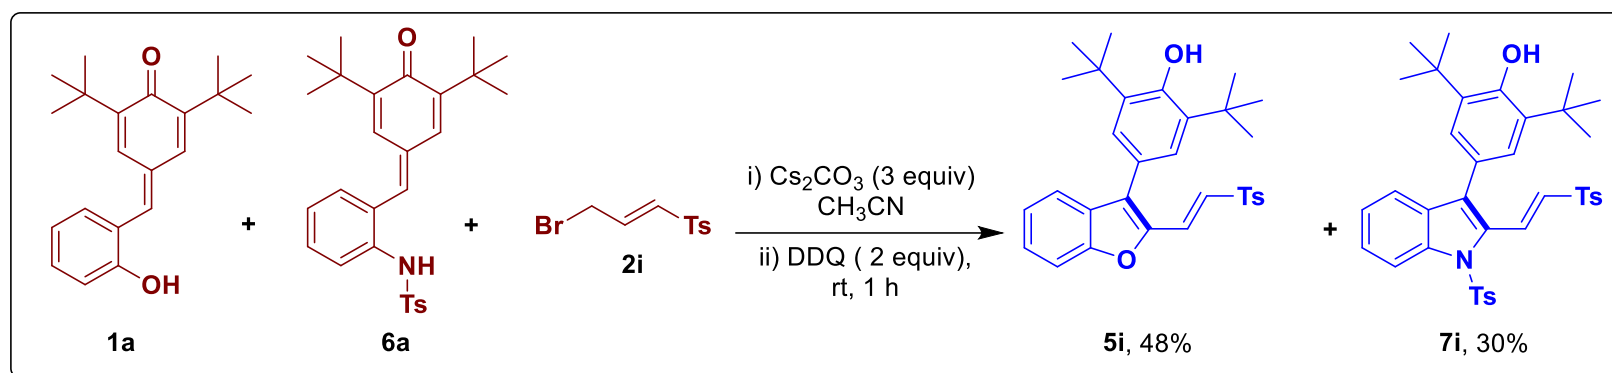

In a 15 mL clean and dry screw cap vial, *p*-QMs **1a** (or) **6a** (1 equiv, 0.5 mmol) and ethyl (*E*)-1-((3-bromoprop-1-en-1-yl)sulfonyl)-4-methylbenzene **2f** (1 equiv, 0.5 mmol, 137 mg) in  $\text{CH}_3\text{CN}$  (5 mL) were taken followed by the addition of  $\text{Cs}_2\text{CO}_3$  (3 equiv, 1.5 mmol, 489 mg). The reaction mixture was stirred at room temperature for 2 h. Subsequently, DDQ (2 equiv, 1 mmol, 227 mg) was added to the reaction mixture at the same temperature and allowed the reaction mixture to stir for 1 h. To the reaction mixture were added water (10 mL) and EtOAc (10 mL). The resulting mixture was extracted with EtOAc (2 x 10 mL). Then the combined organic phase was washed with water (10 mL) and brine (5 mL). The organic extract was dried over anhydrous  $\text{Na}_2\text{SO}_4$ , filtered and concentrated under reduced pressure to give a crude residue. The resulting residue was purified by column chromatography on silica gel to afford the products **5i** and **7i** in 48%, 30% yield, respectively.

## 7. Copies of $^1\text{H}$ -NMR, $^{13}\text{C}\{^1\text{H}\}$ NMR and $^{19}\text{F}$ -NMR spectra

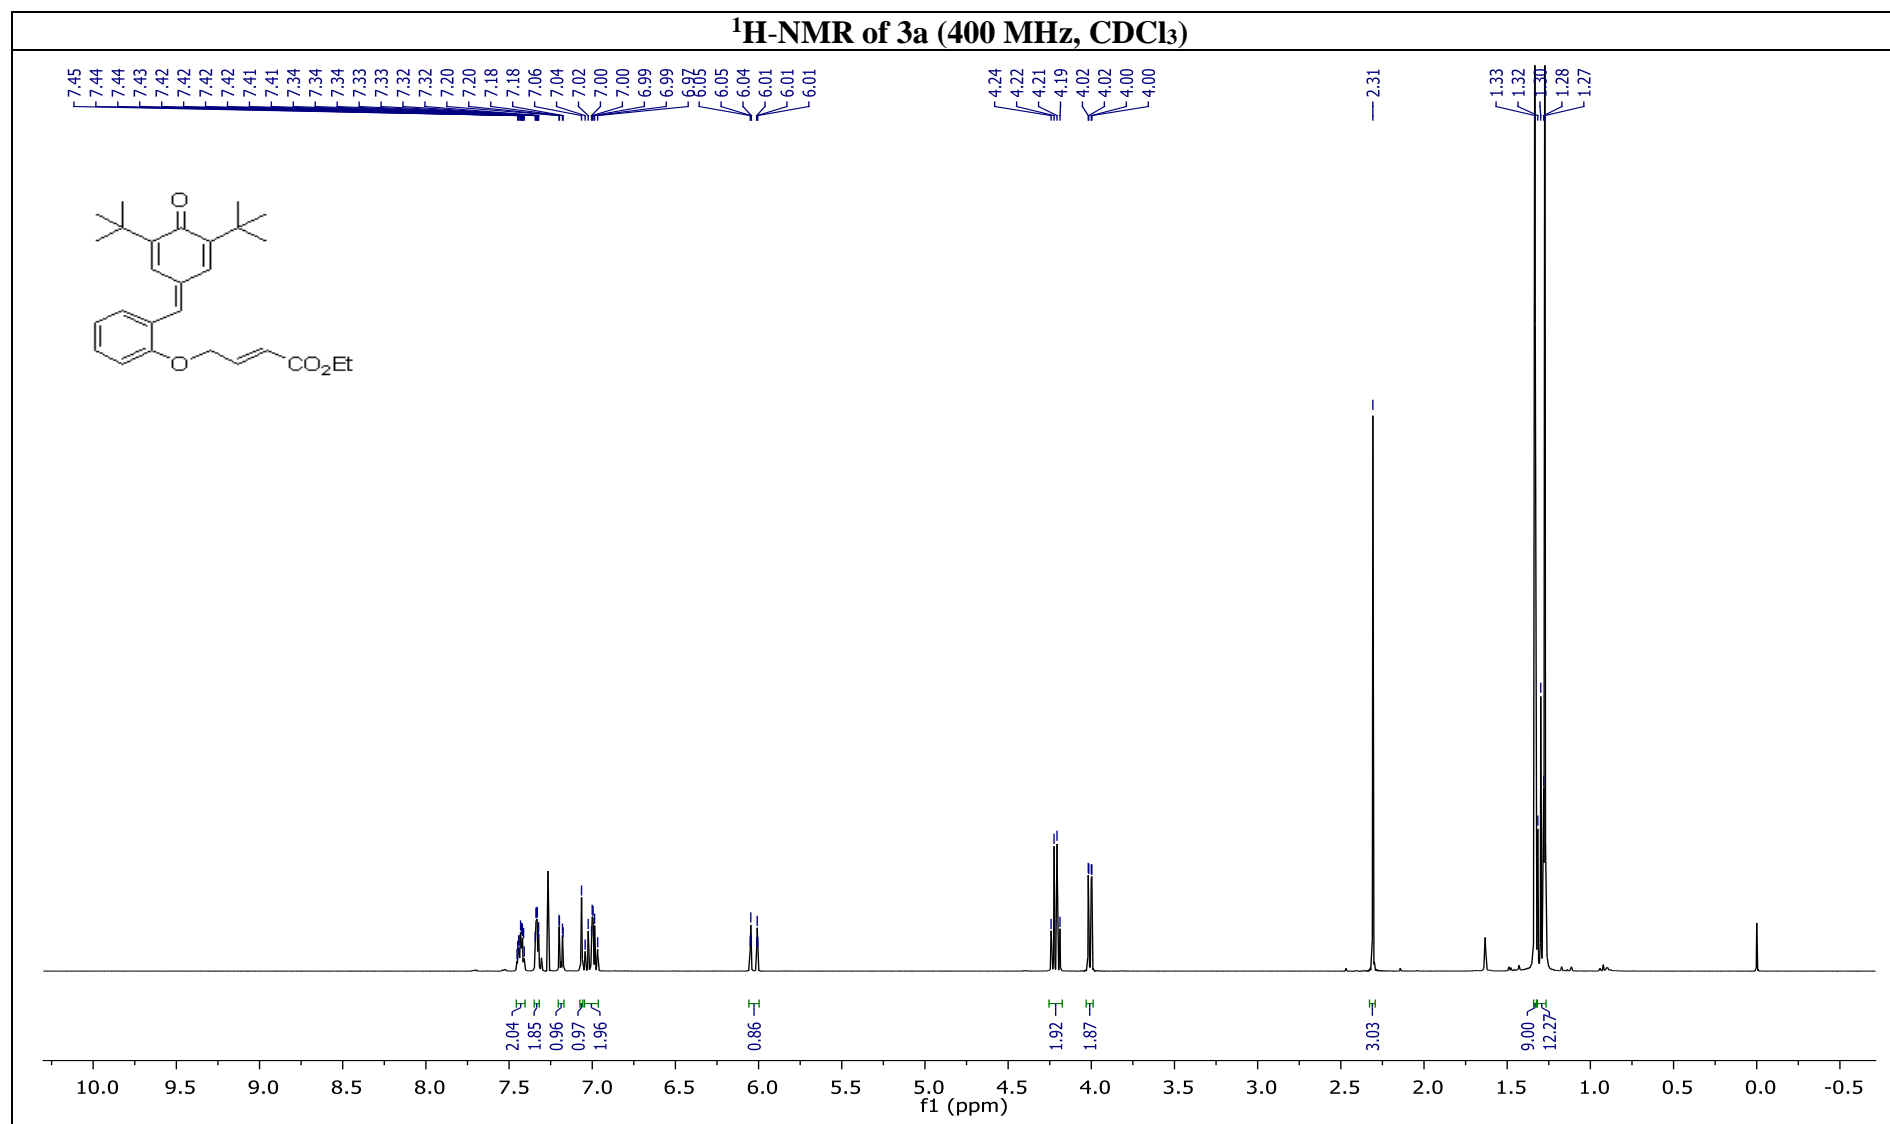

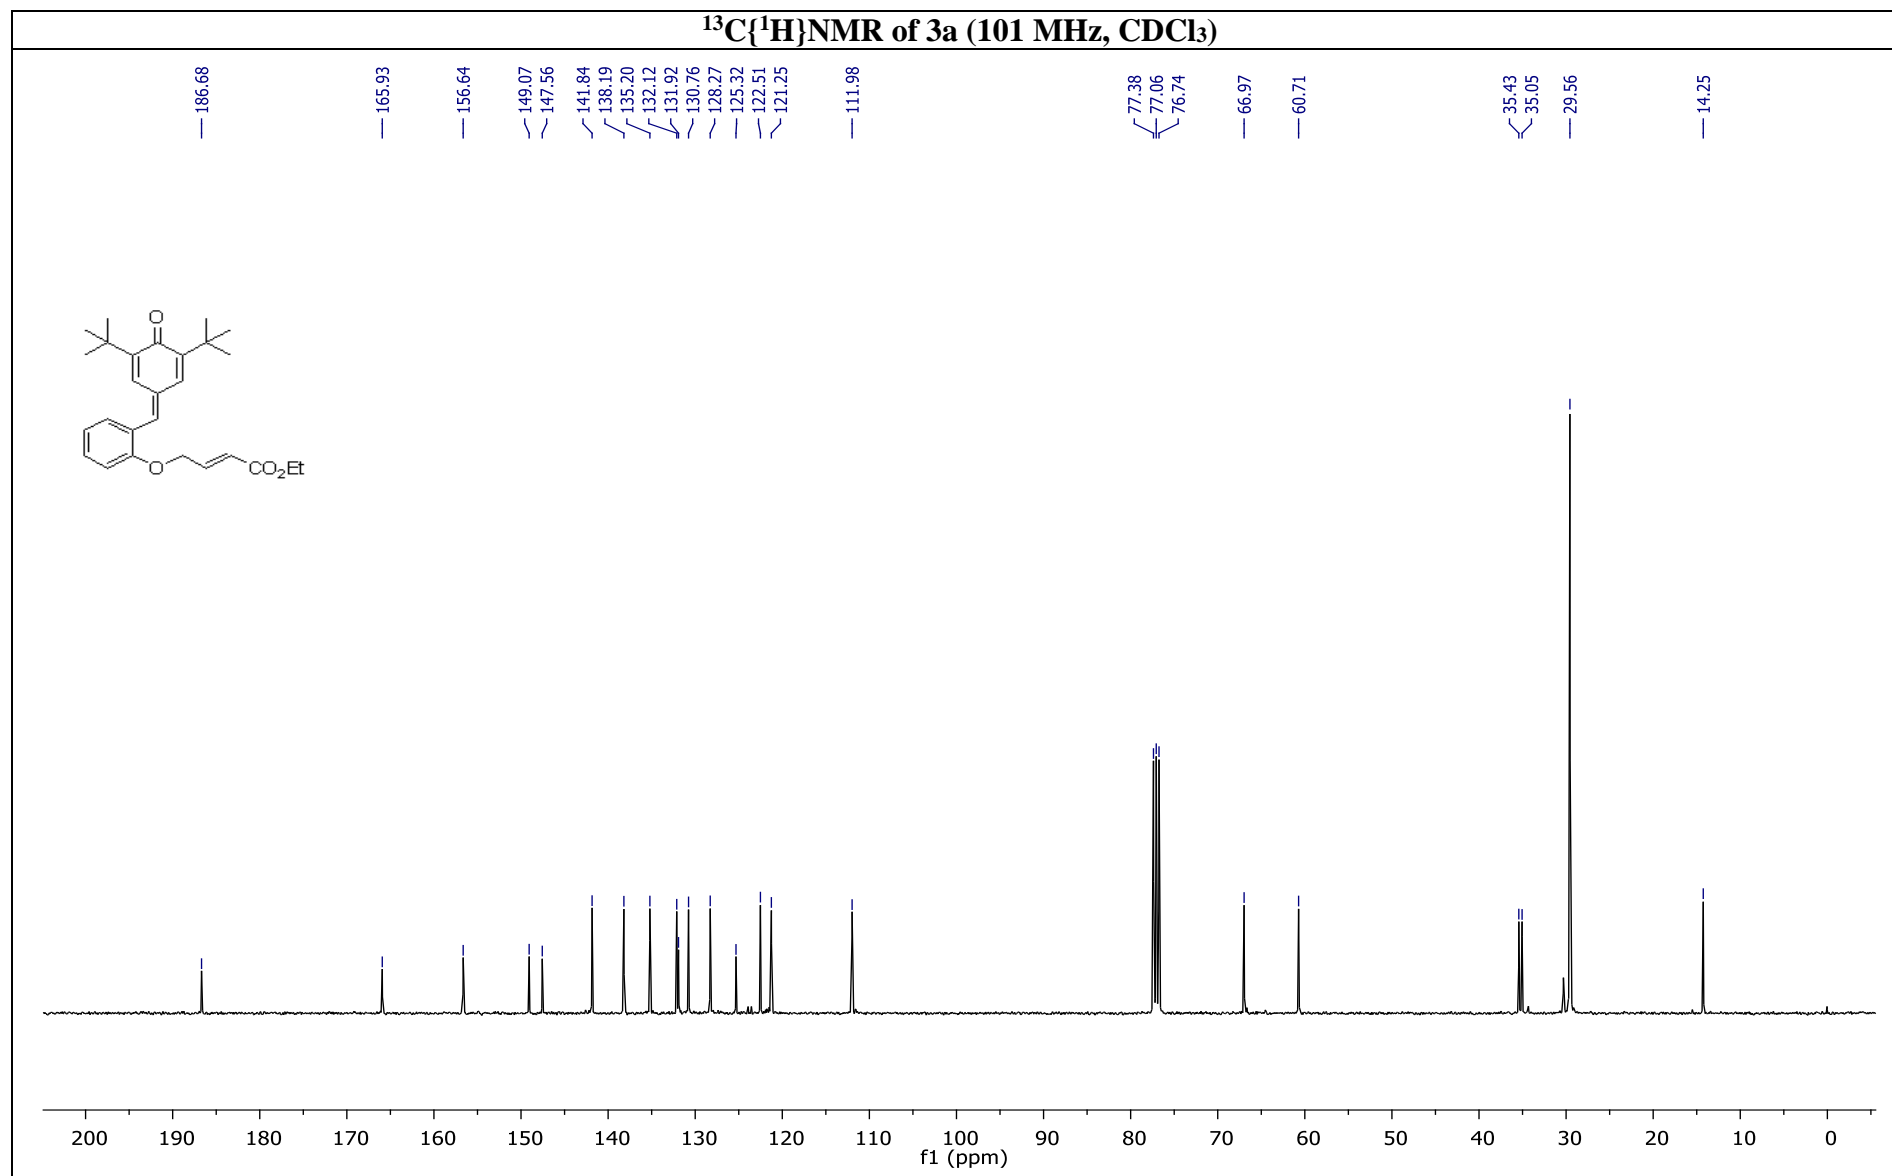

DEPT-NMR of 3a (135 MHz, CDCl<sub>3</sub>)

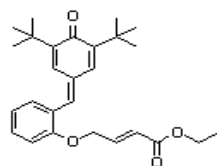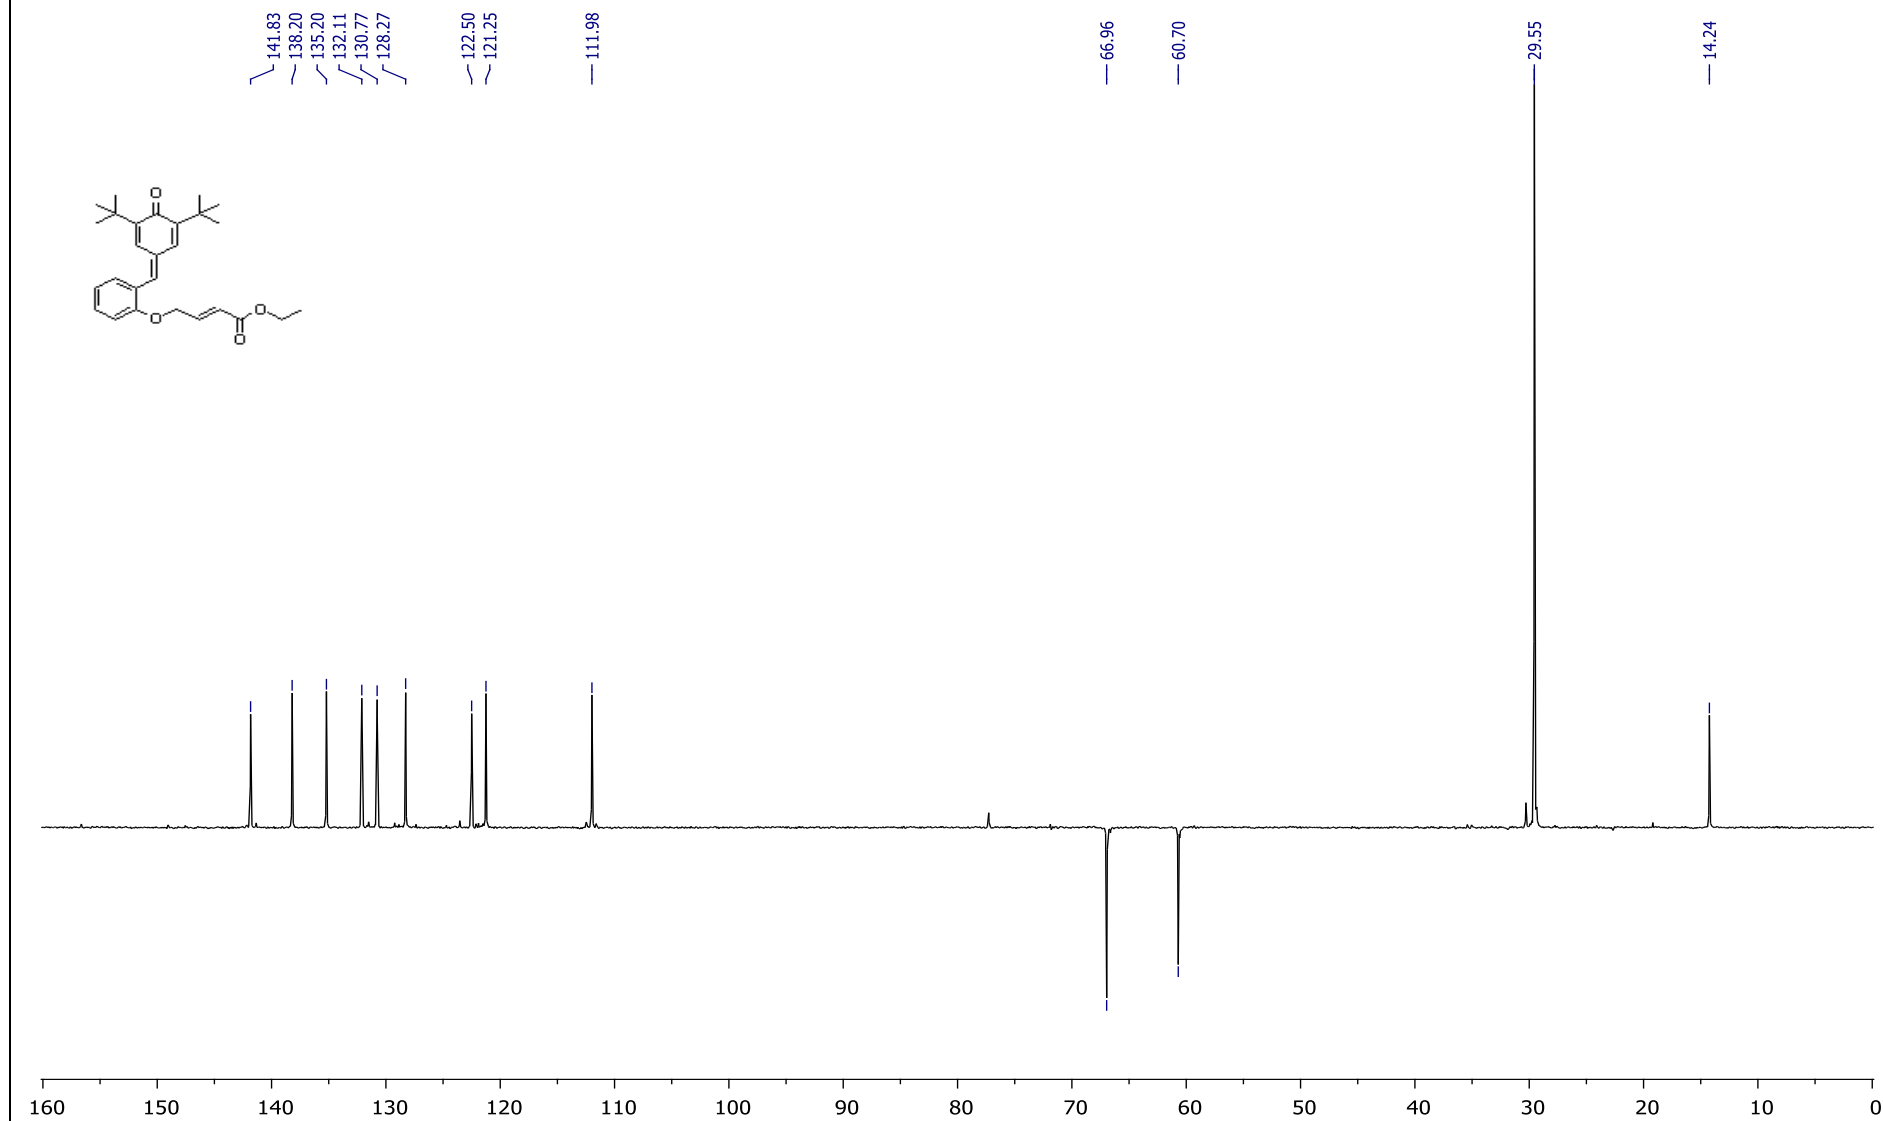

# Crude <sup>1</sup>H-NMR of 4a and 5a (1:1.4 ratio)

7.78 7.74 7.70 7.68 7.53 7.51 7.43 7.43 7.41 7.38 7.30 7.30 7.28 7.27 7.26 7.22 7.20 7.18 7.14 7.13 7.10 7.09 7.04 7.02 6.98 6.92 6.92 6.90 6.89 6.65 6.61 6.15 6.11 6.11 5.41 5.18 5.12 5.12 5.12 5.11 5.10 4.34 4.28 4.27 4.25 4.23 4.21 4.19

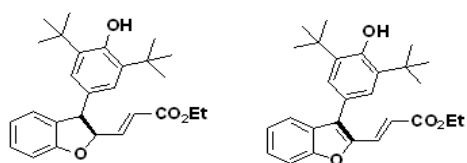

Crude <sup>1</sup>H NMR ratio 1:1.4

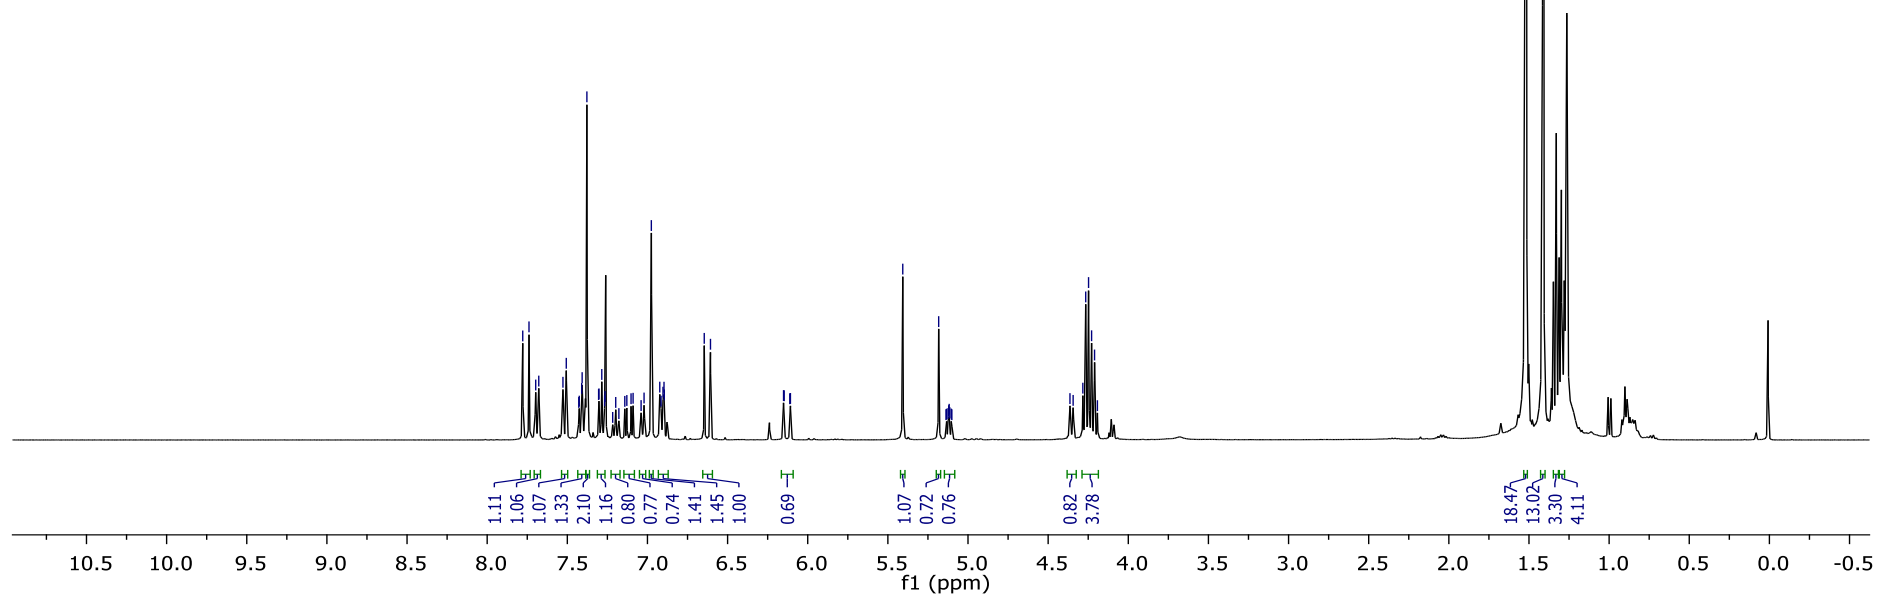

# Crude <sup>1</sup>H-NMR of 4a and 5a (10:1 ratio)

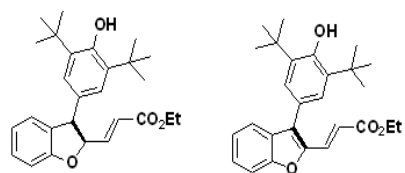

Crude <sup>1</sup>H NMR ratio 10:1

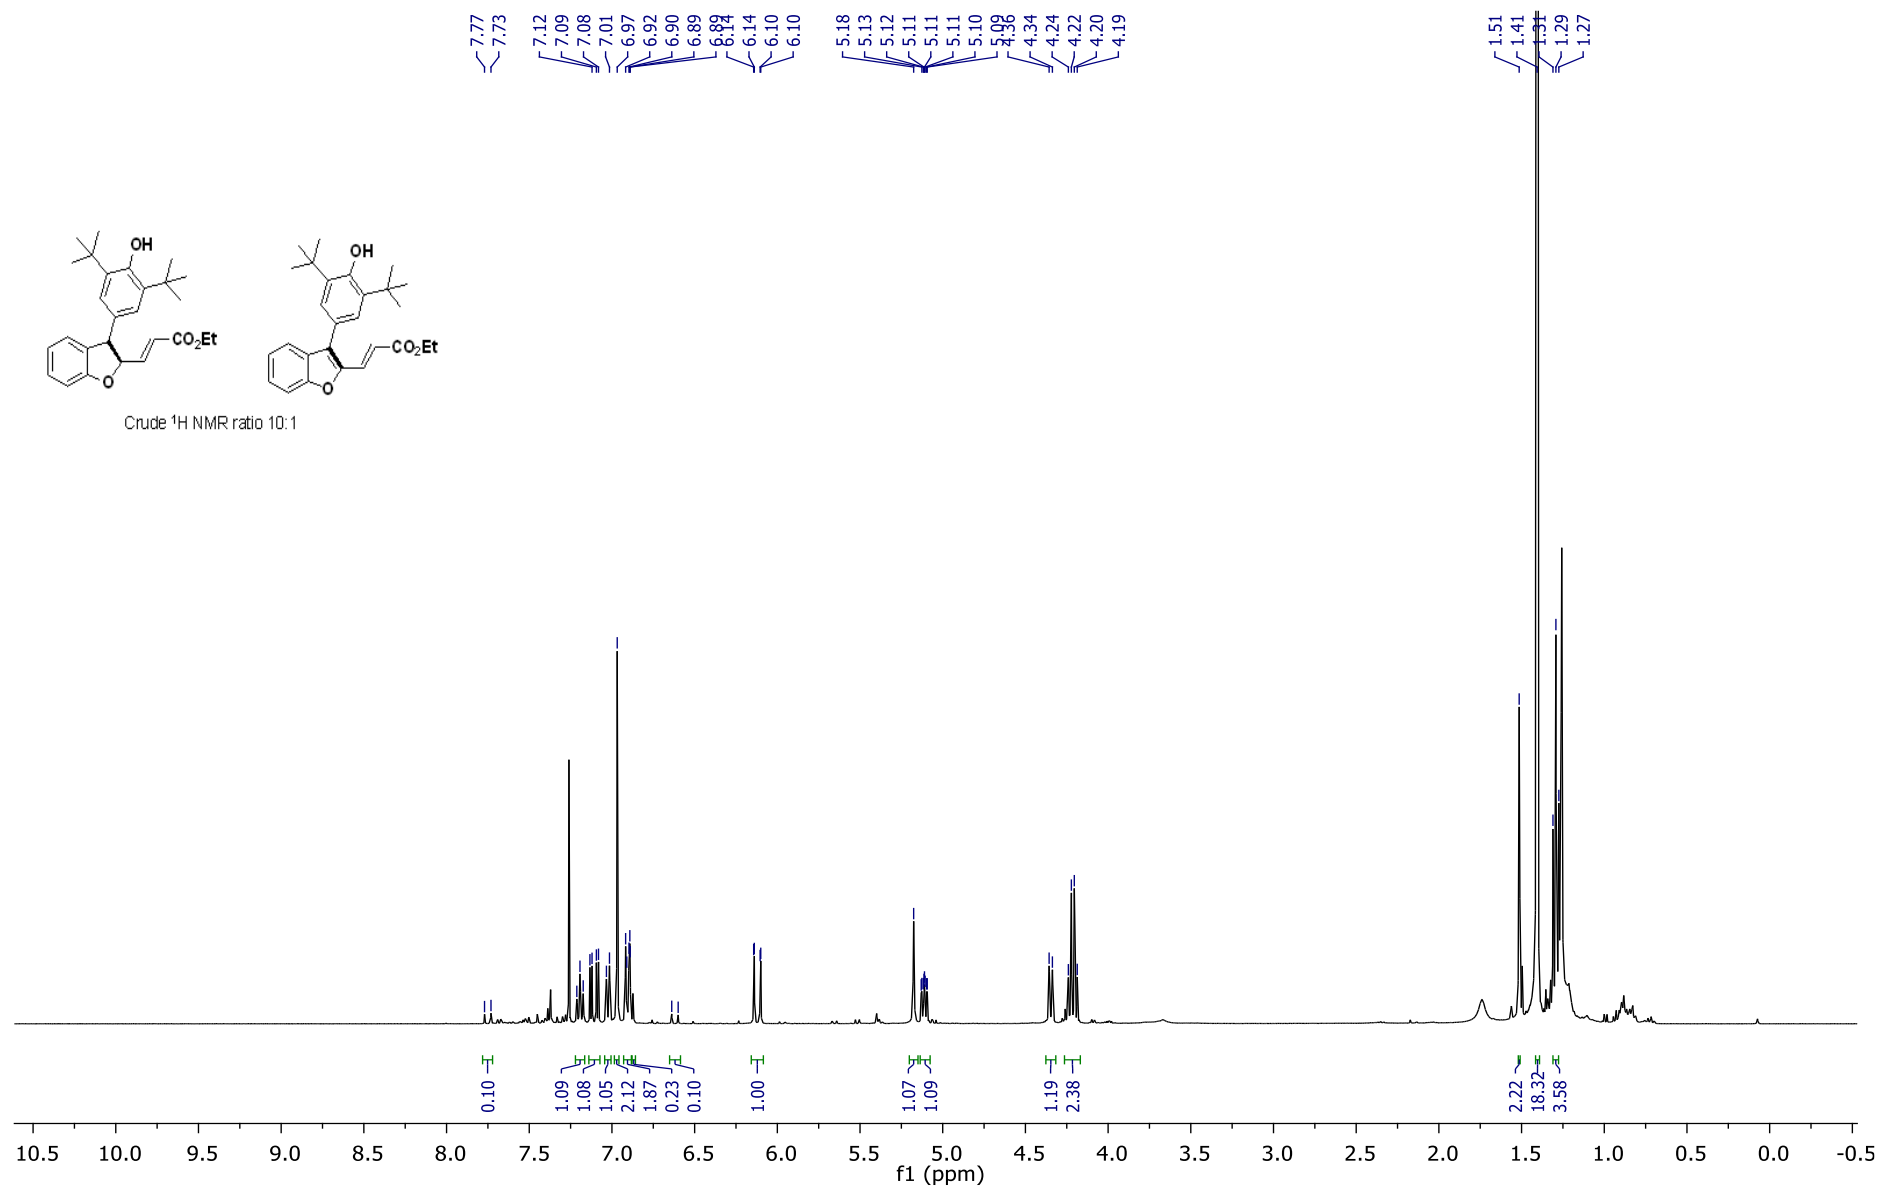

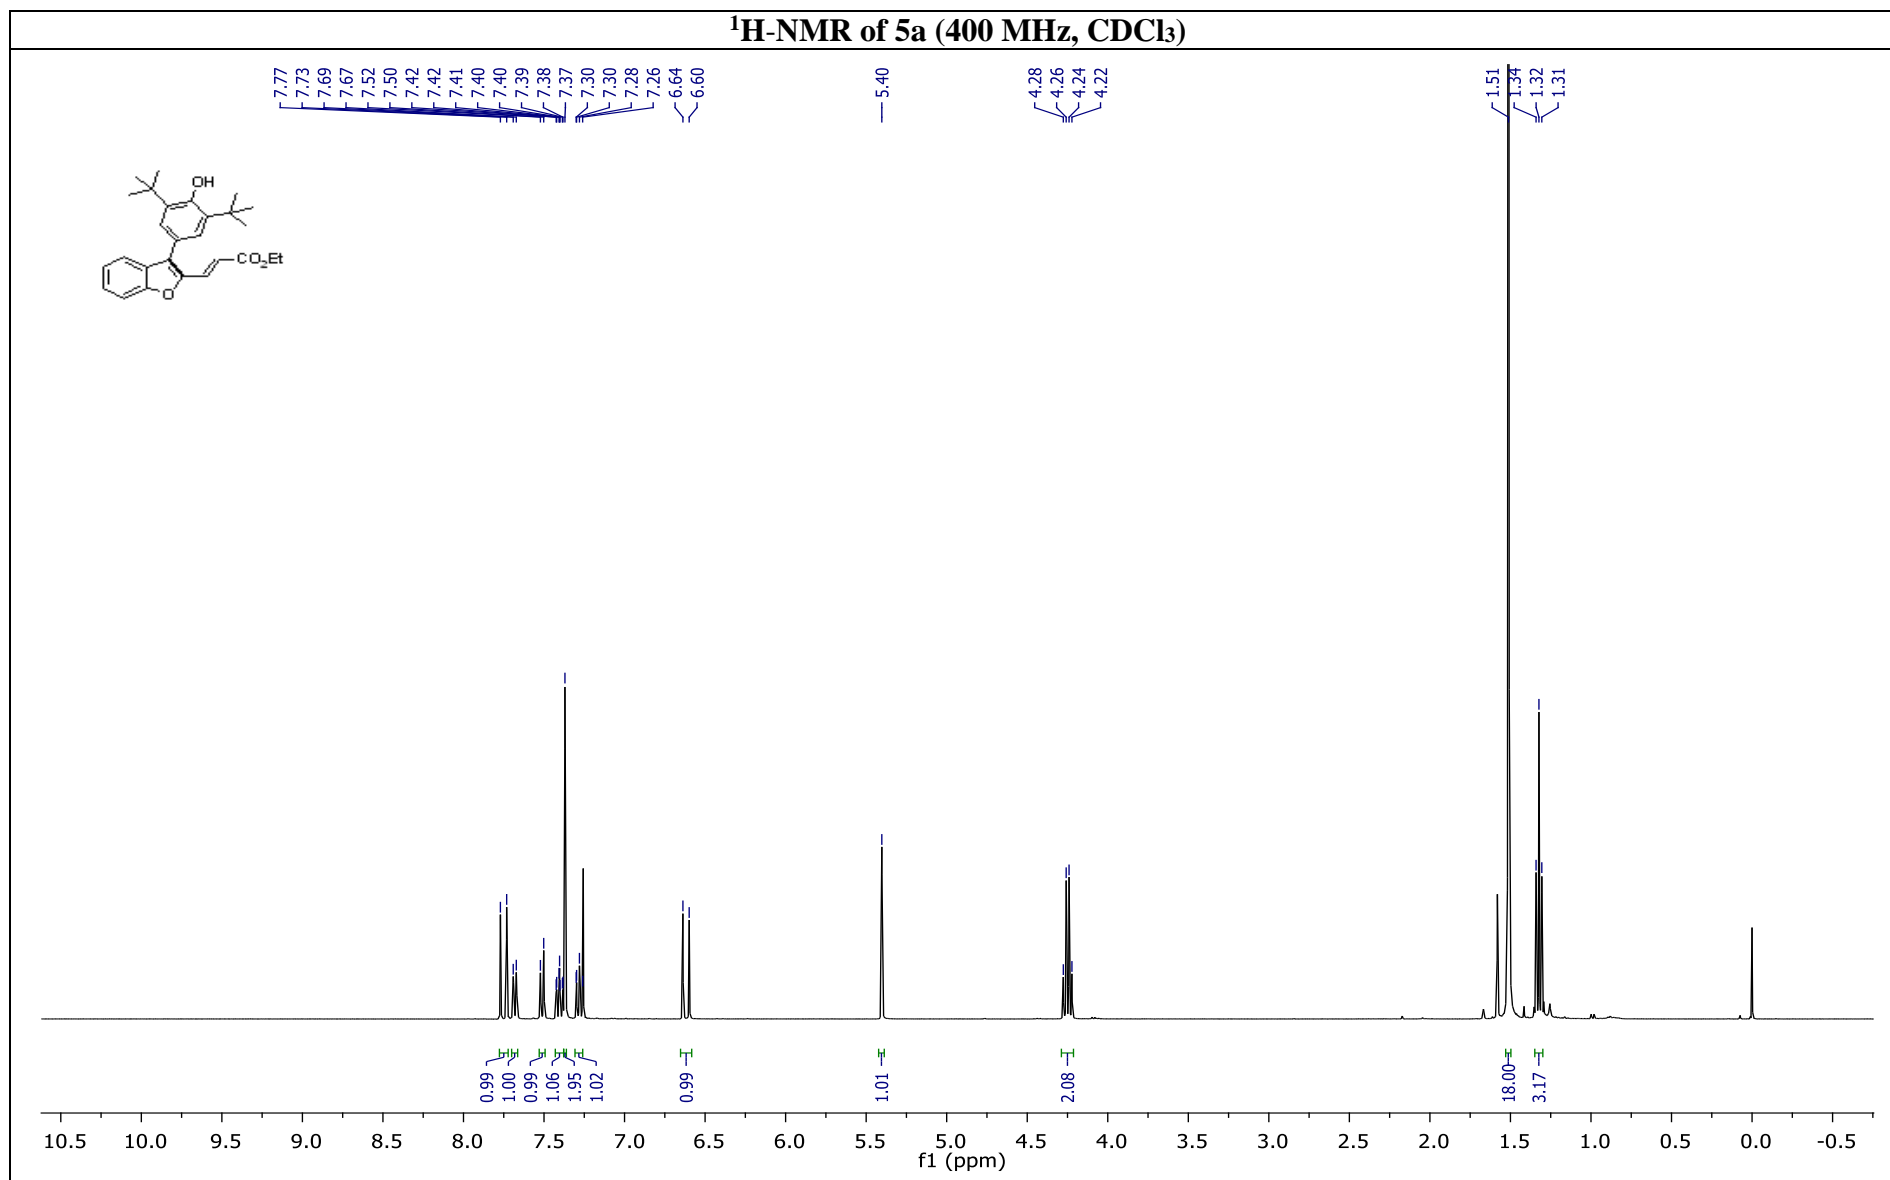

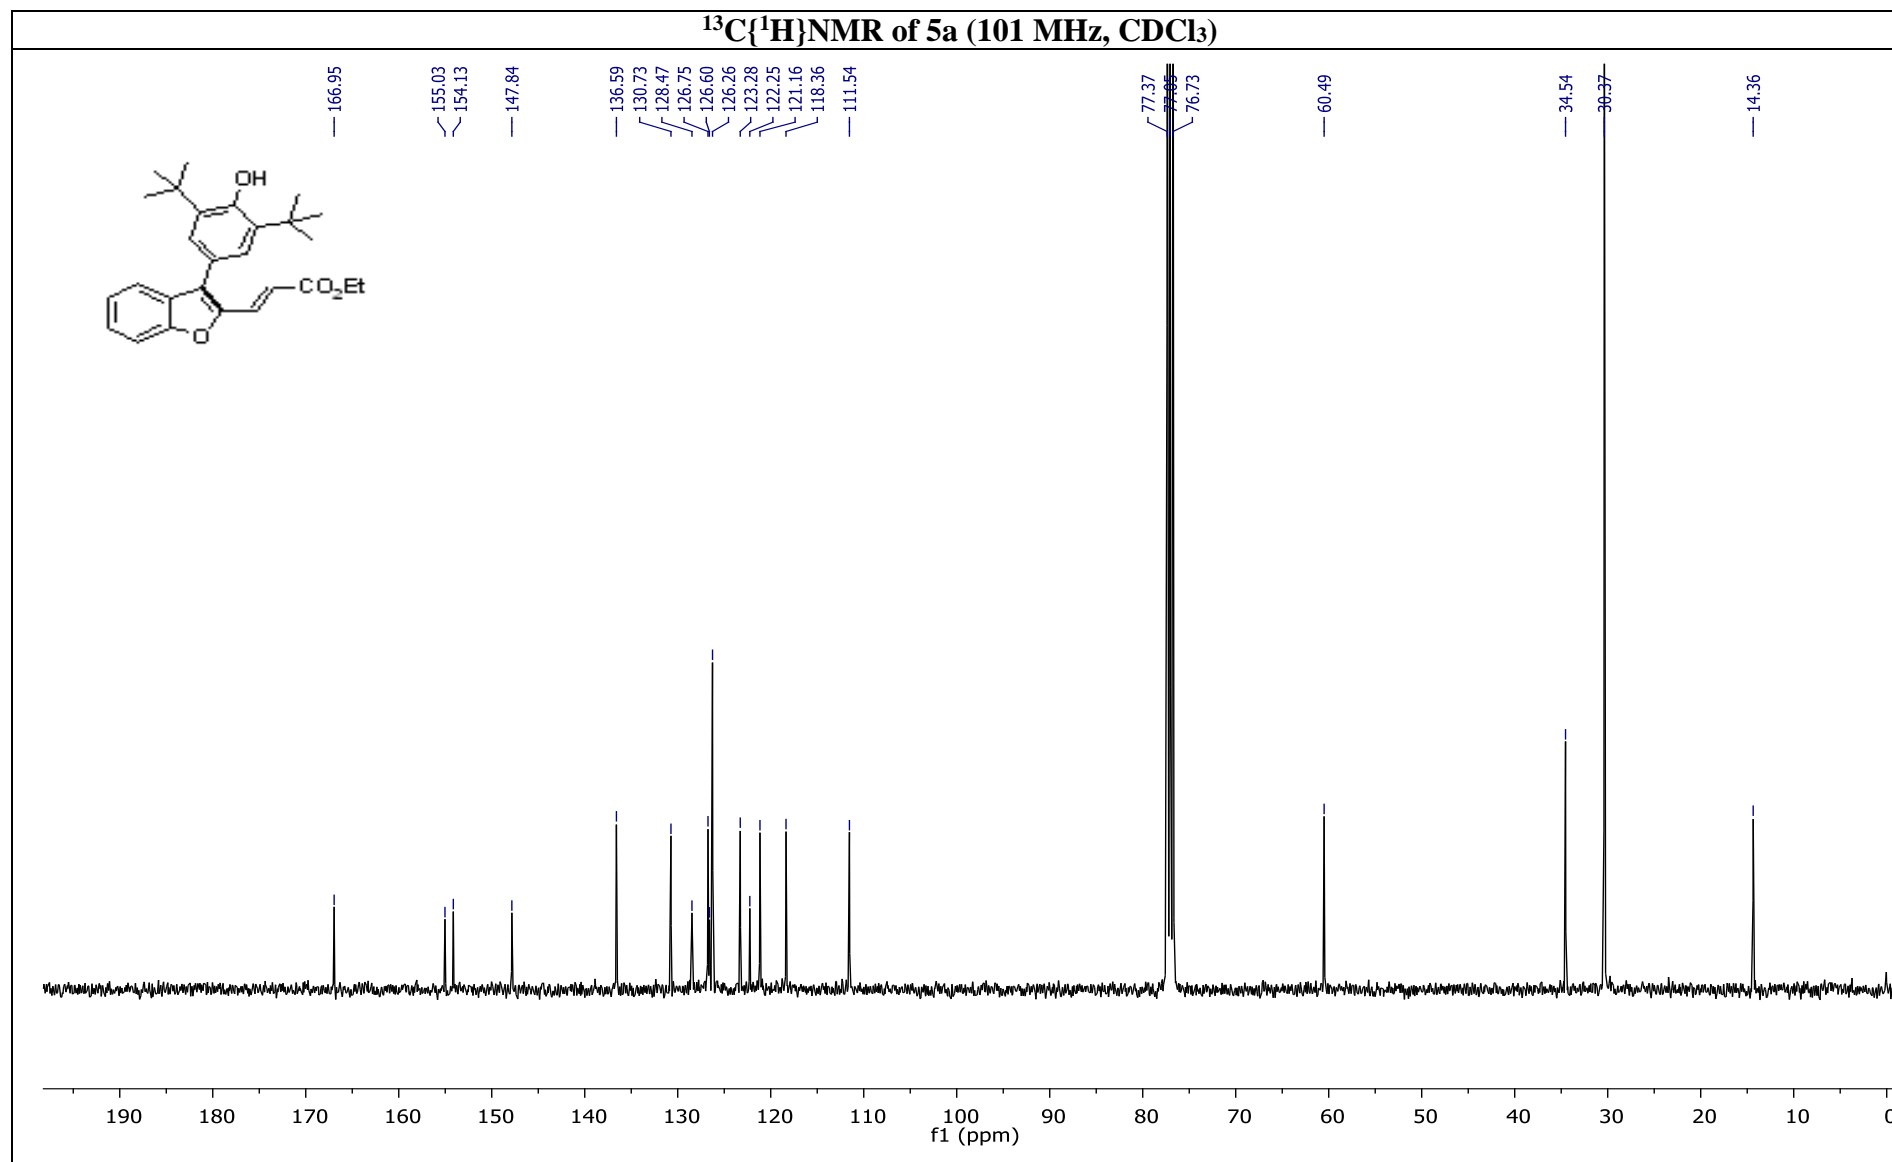

**<sup>1</sup>H-NMR of 5b (400 MHz, CDCl<sub>3</sub>)**

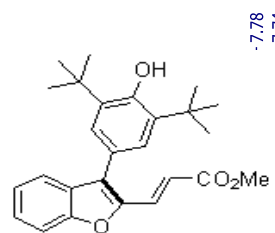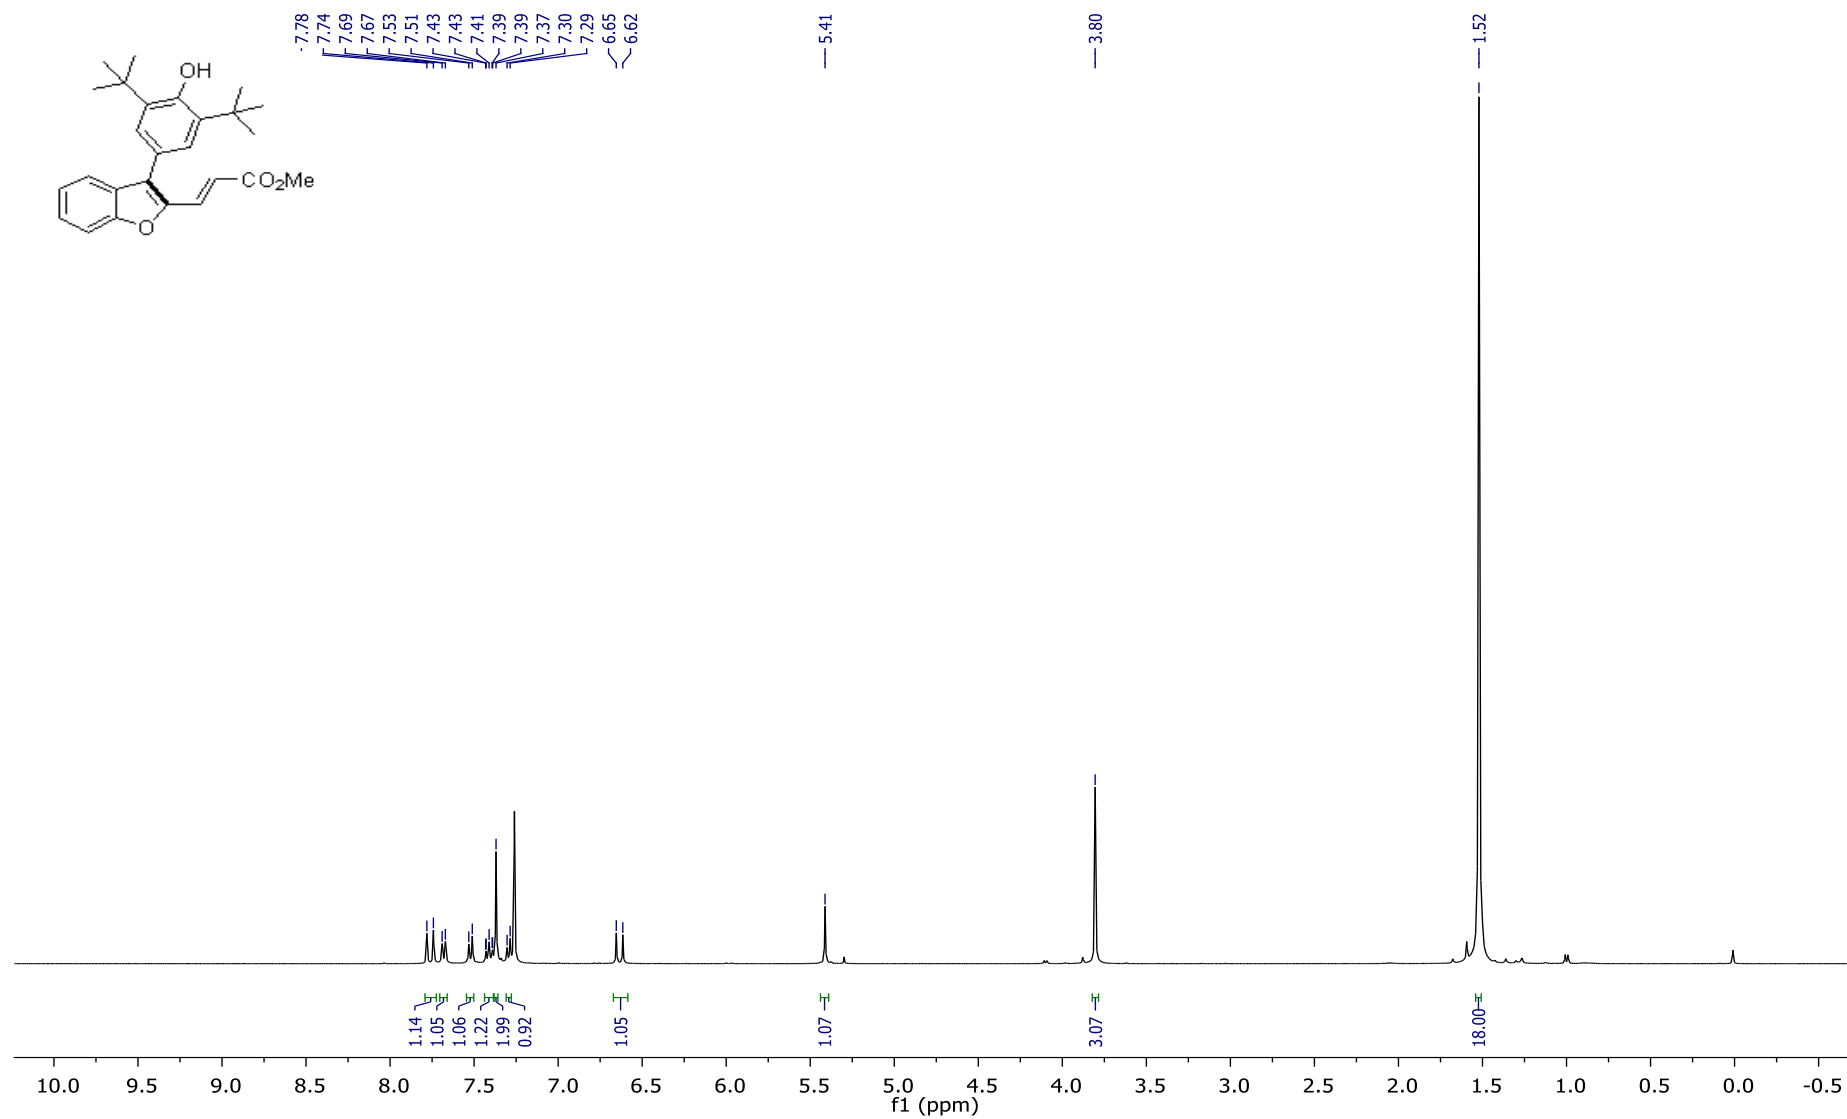

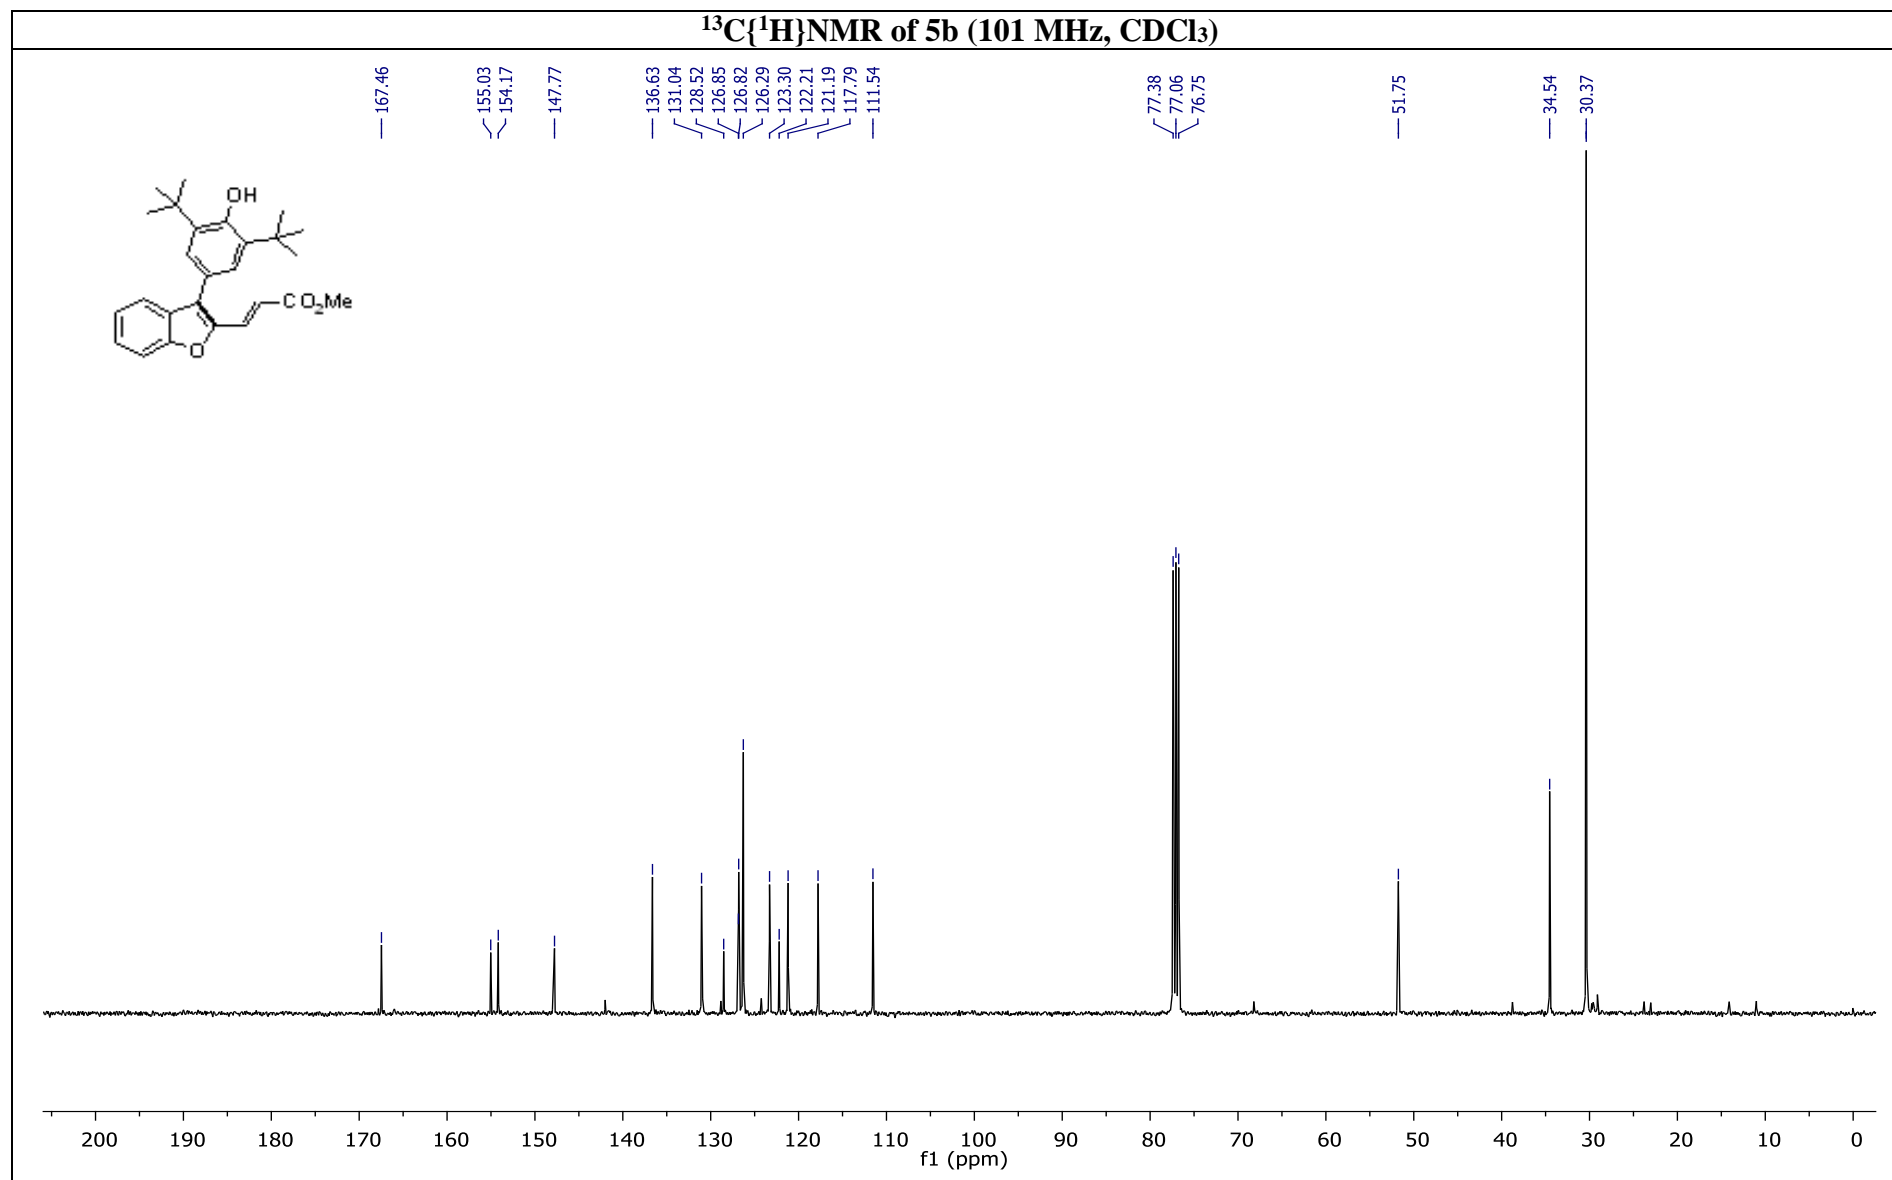

**<sup>1</sup>H-NMR of 5c (500 MHz, CDCl<sub>3</sub>)**

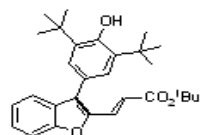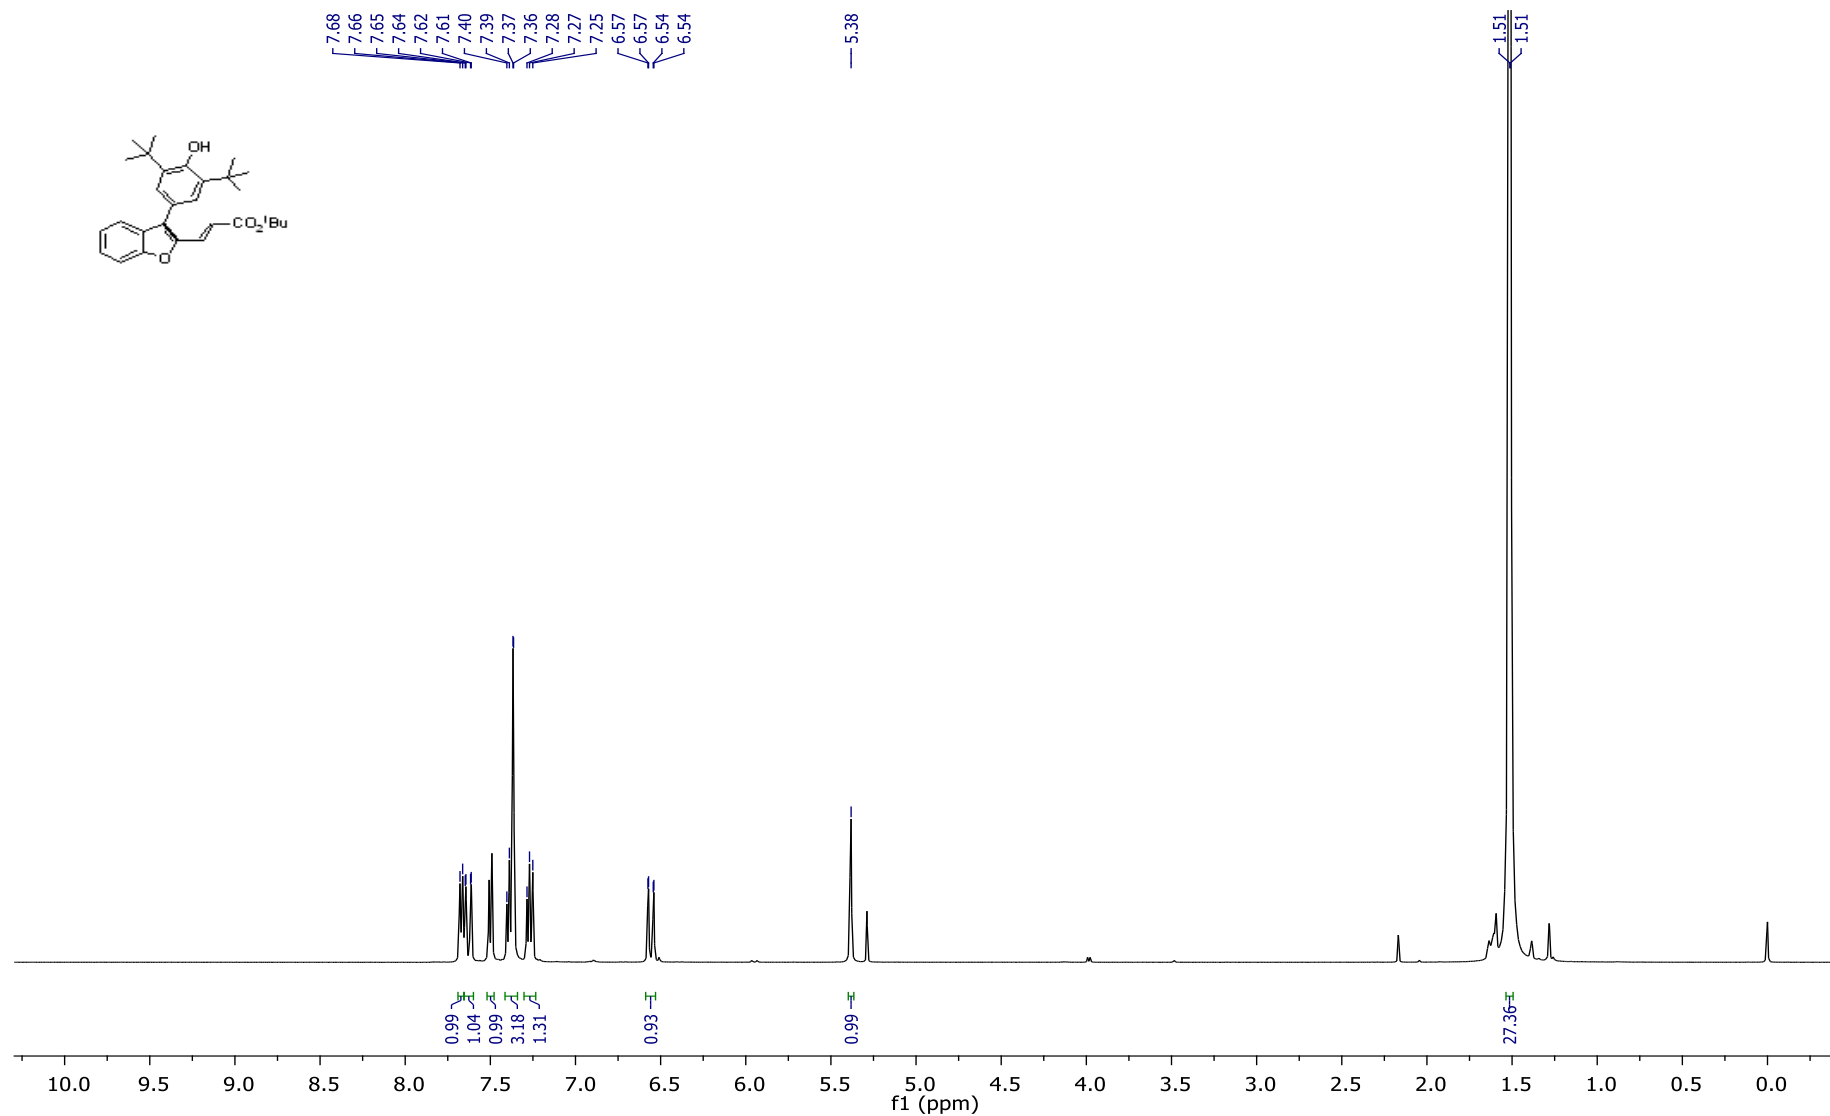

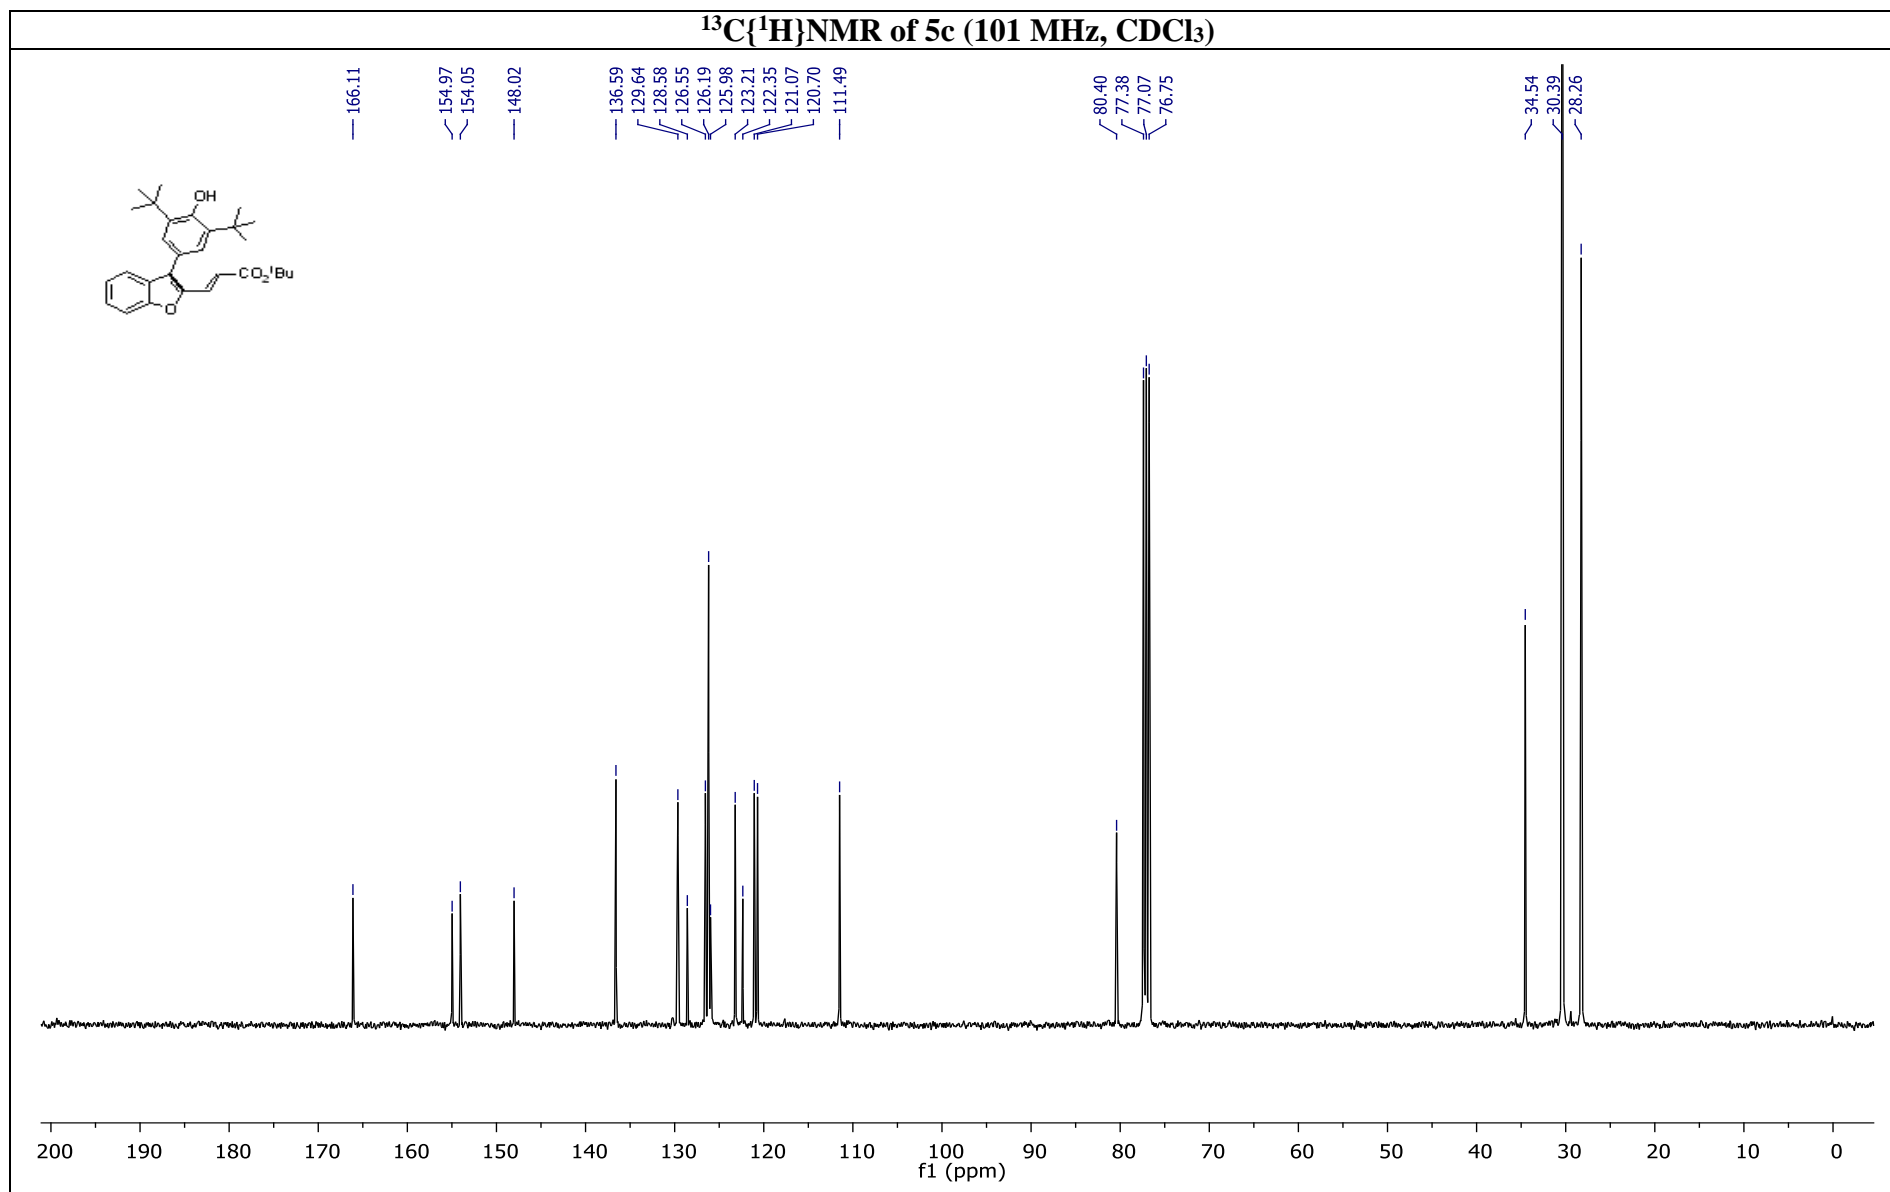

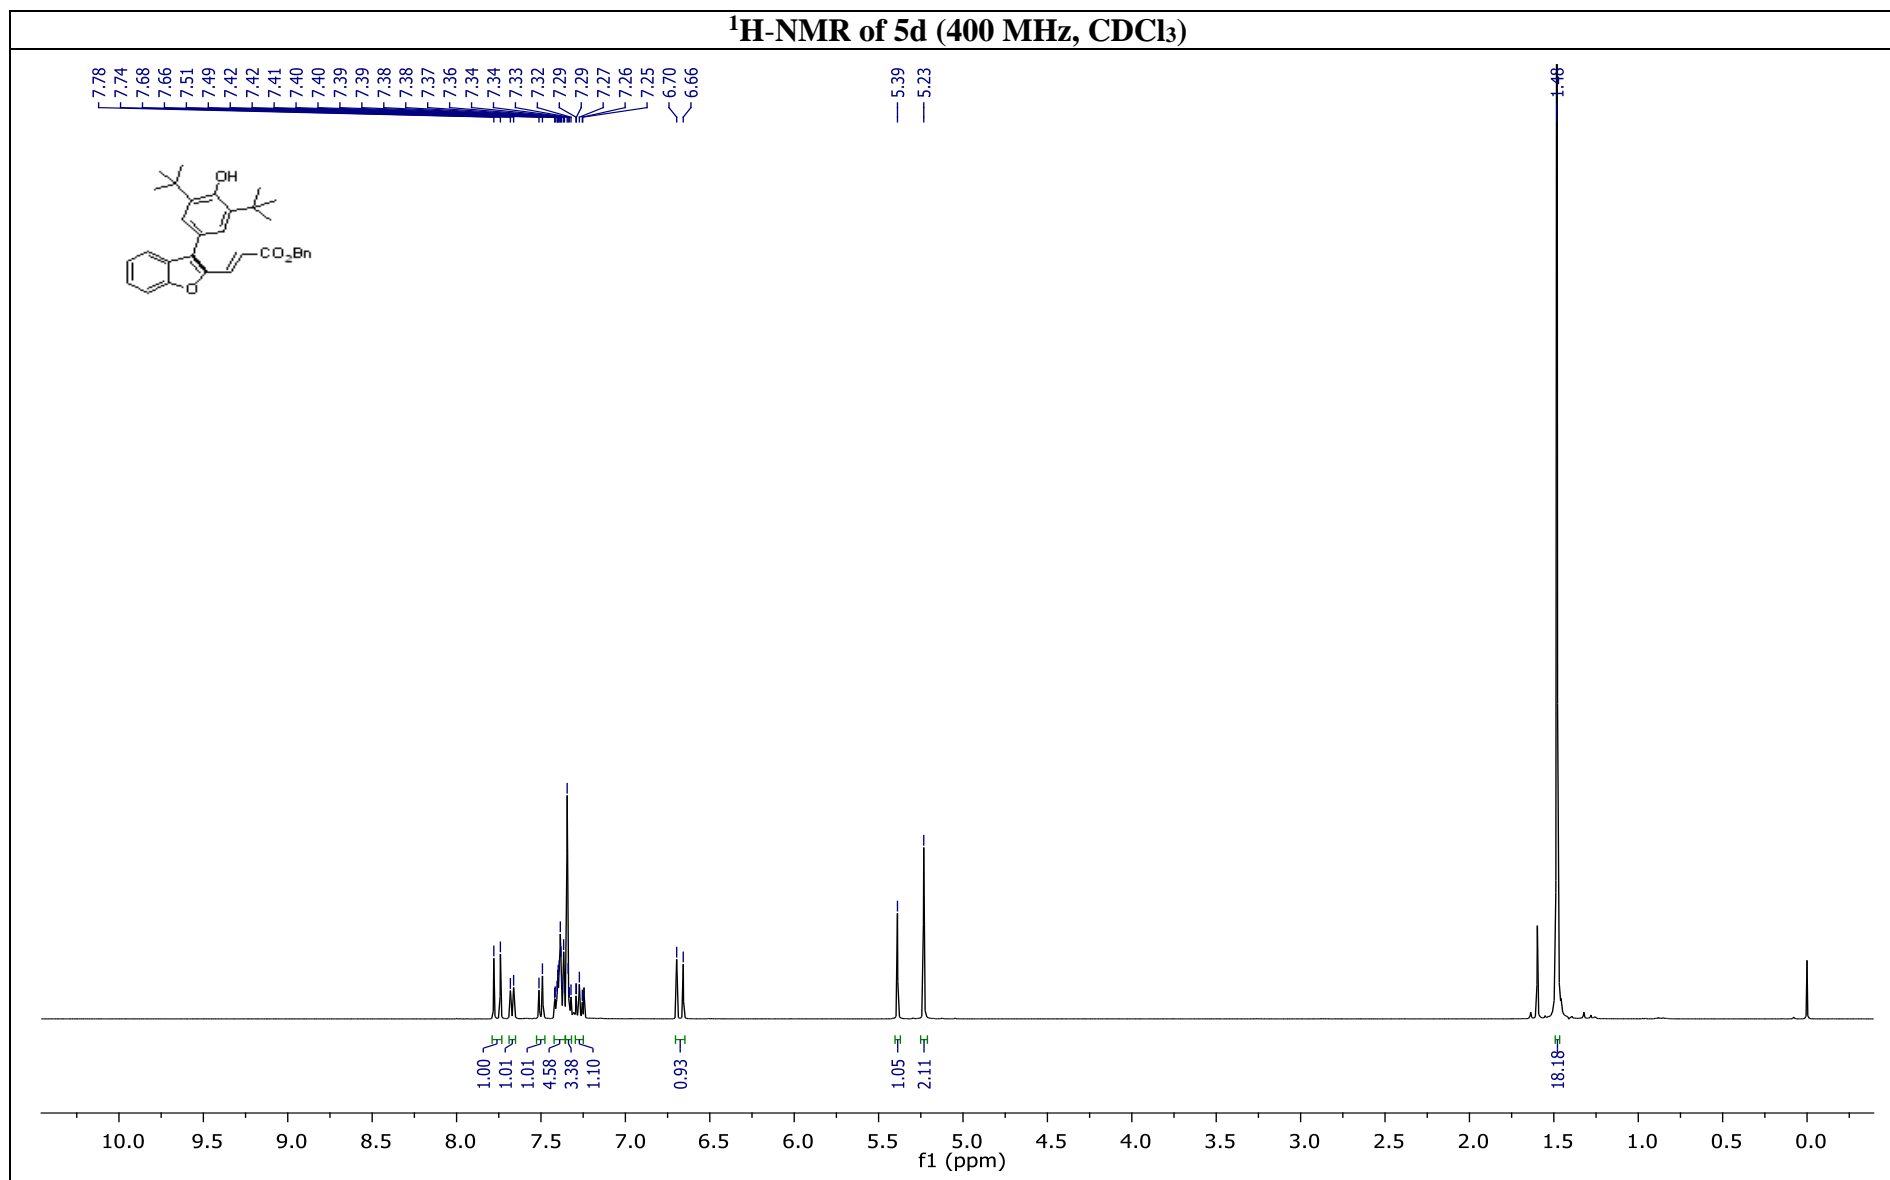

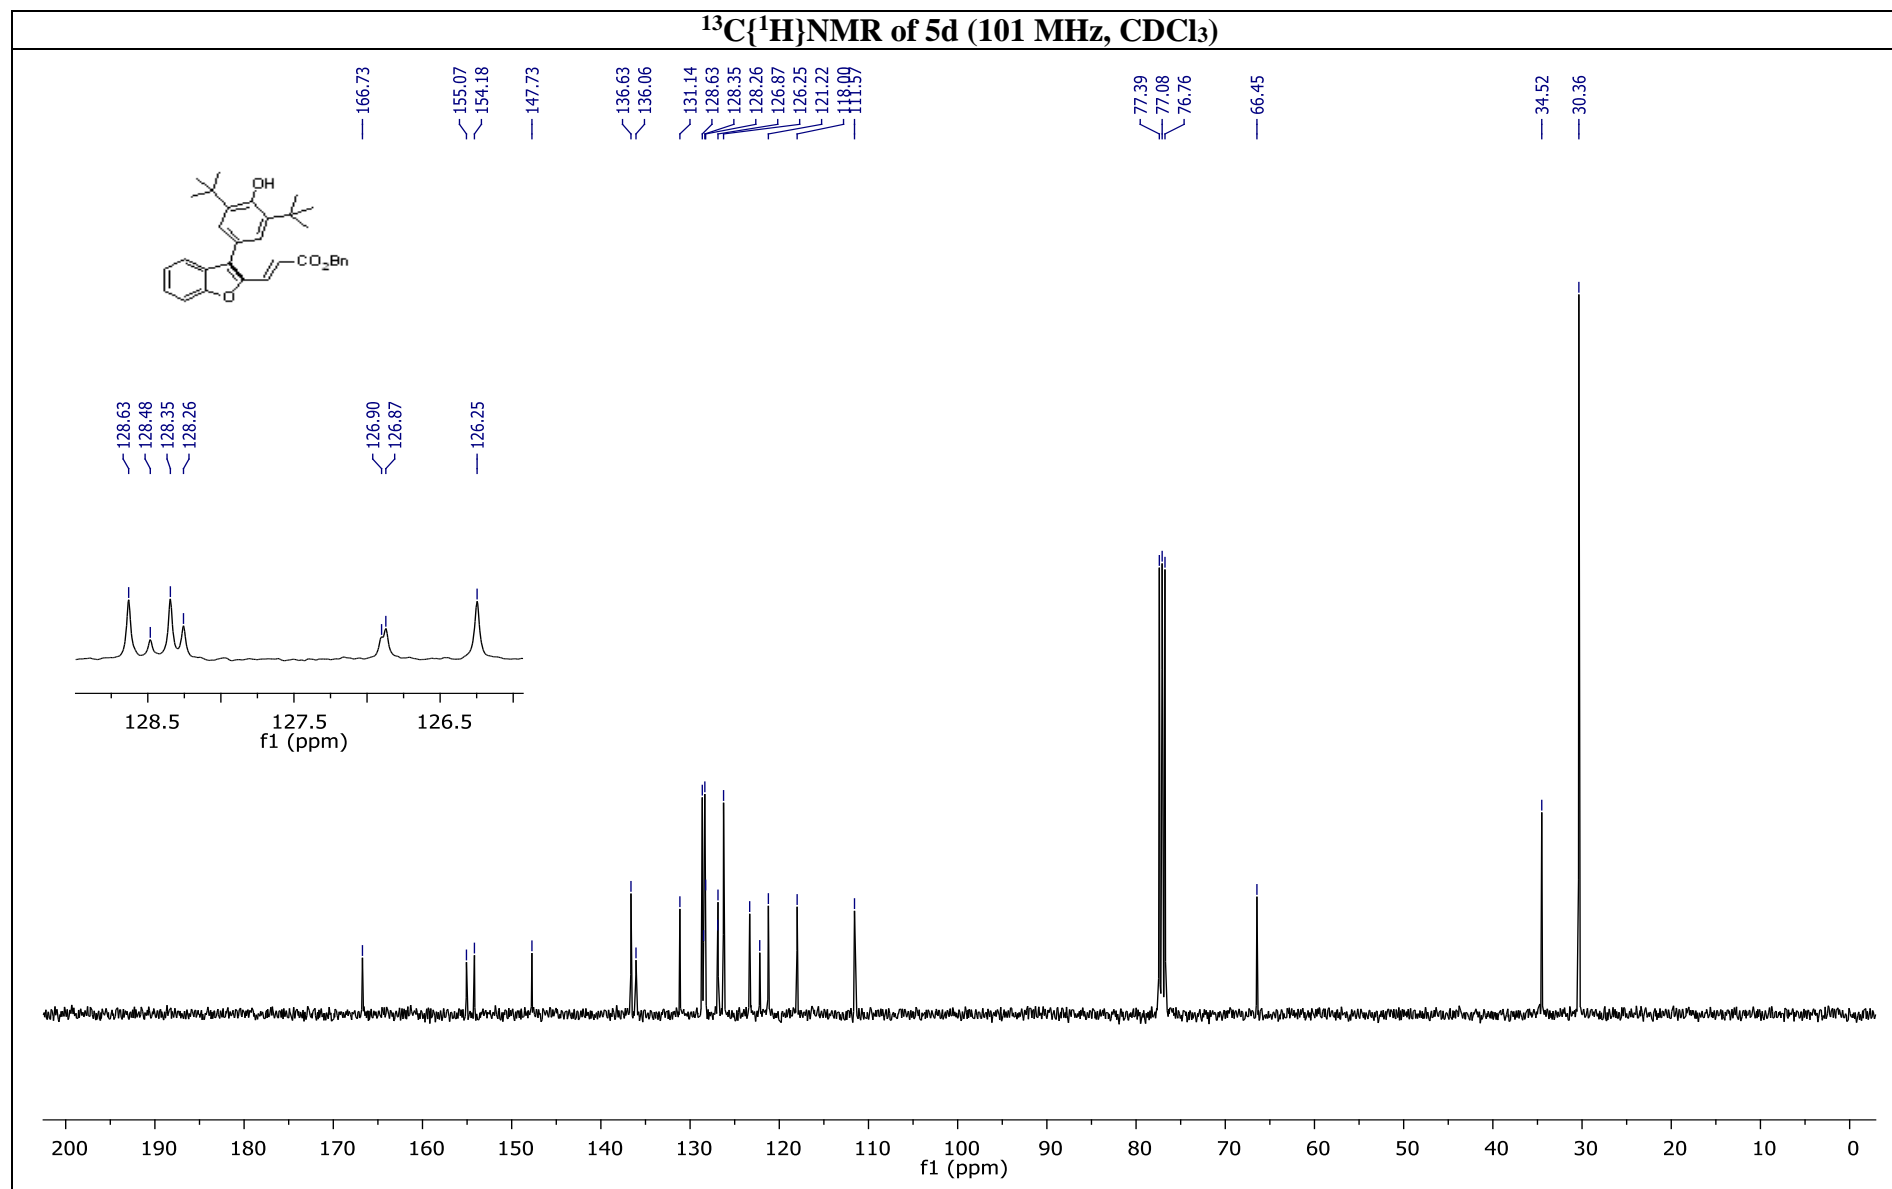

**<sup>1</sup>H-NMR of 5e (400 MHz, CDCl<sub>3</sub>)**

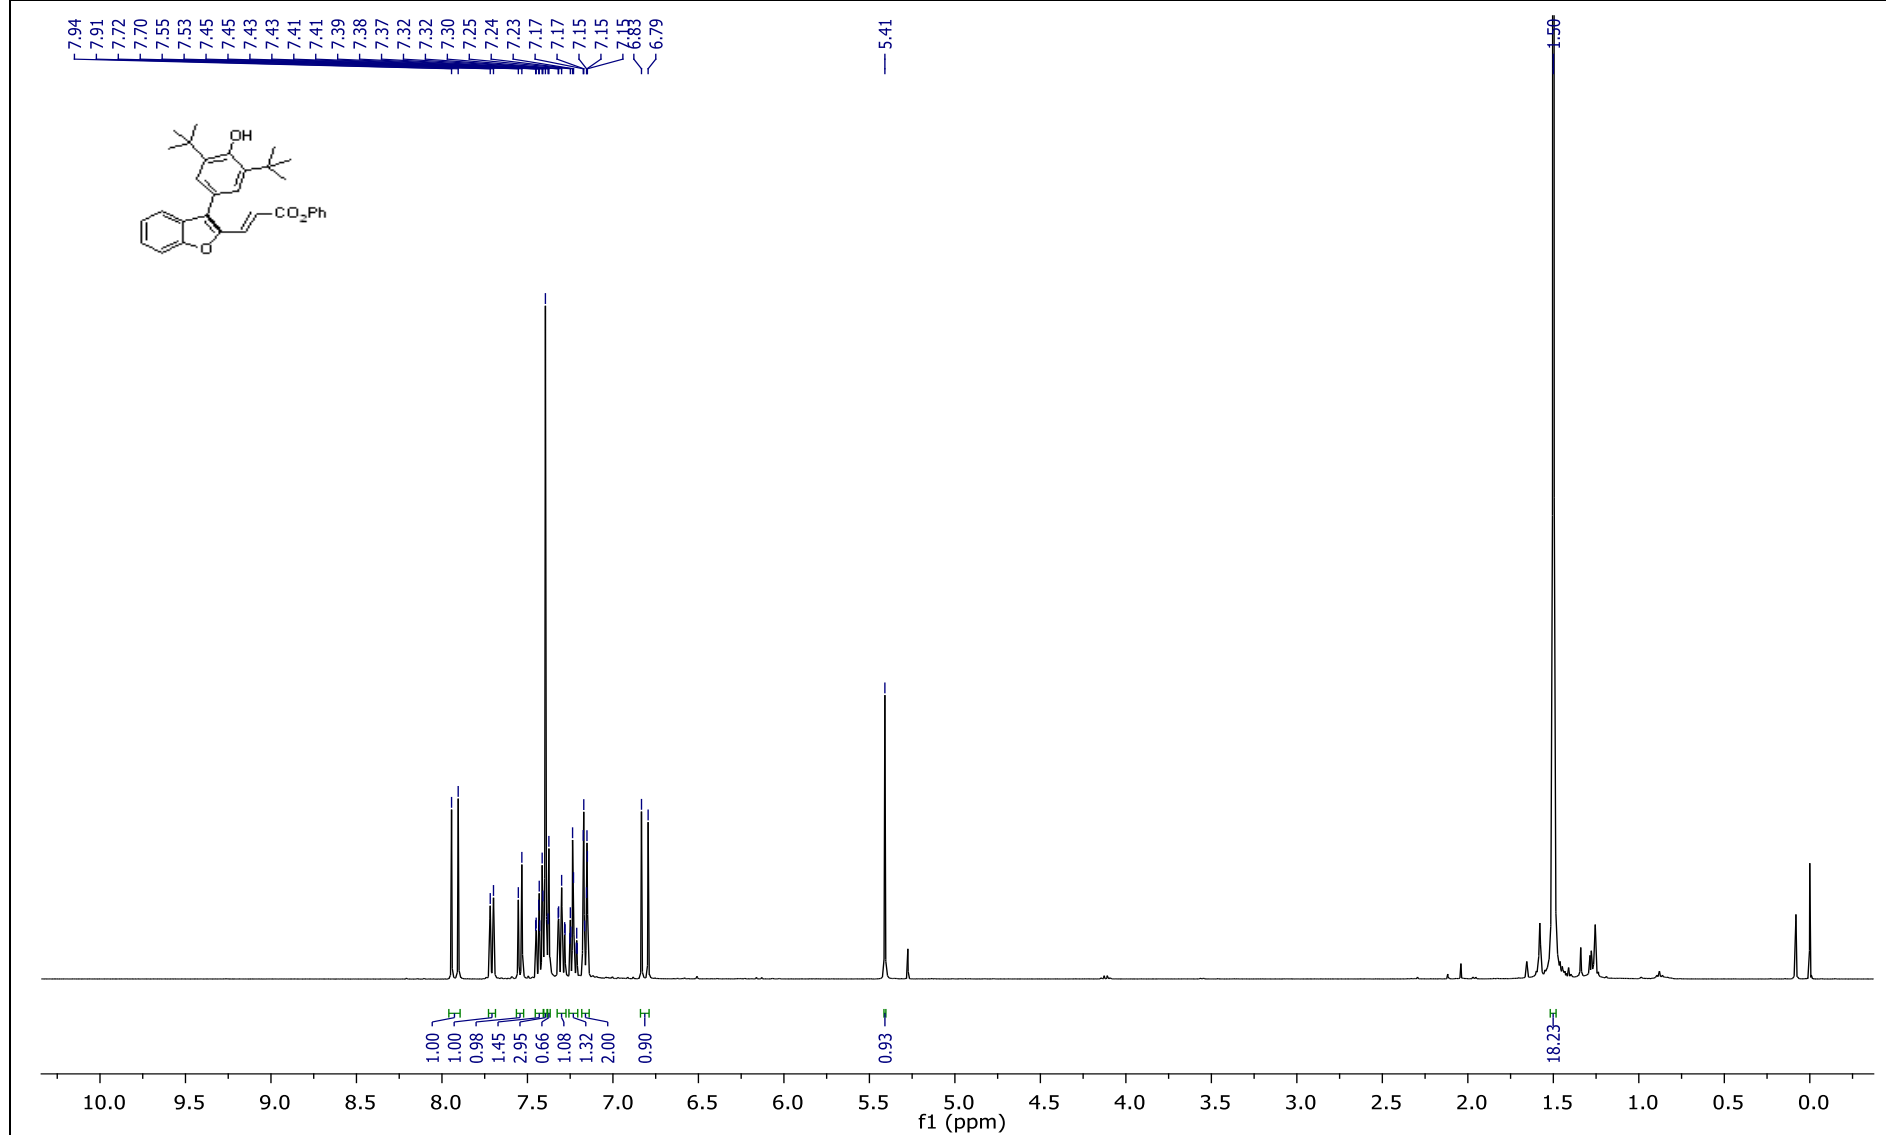

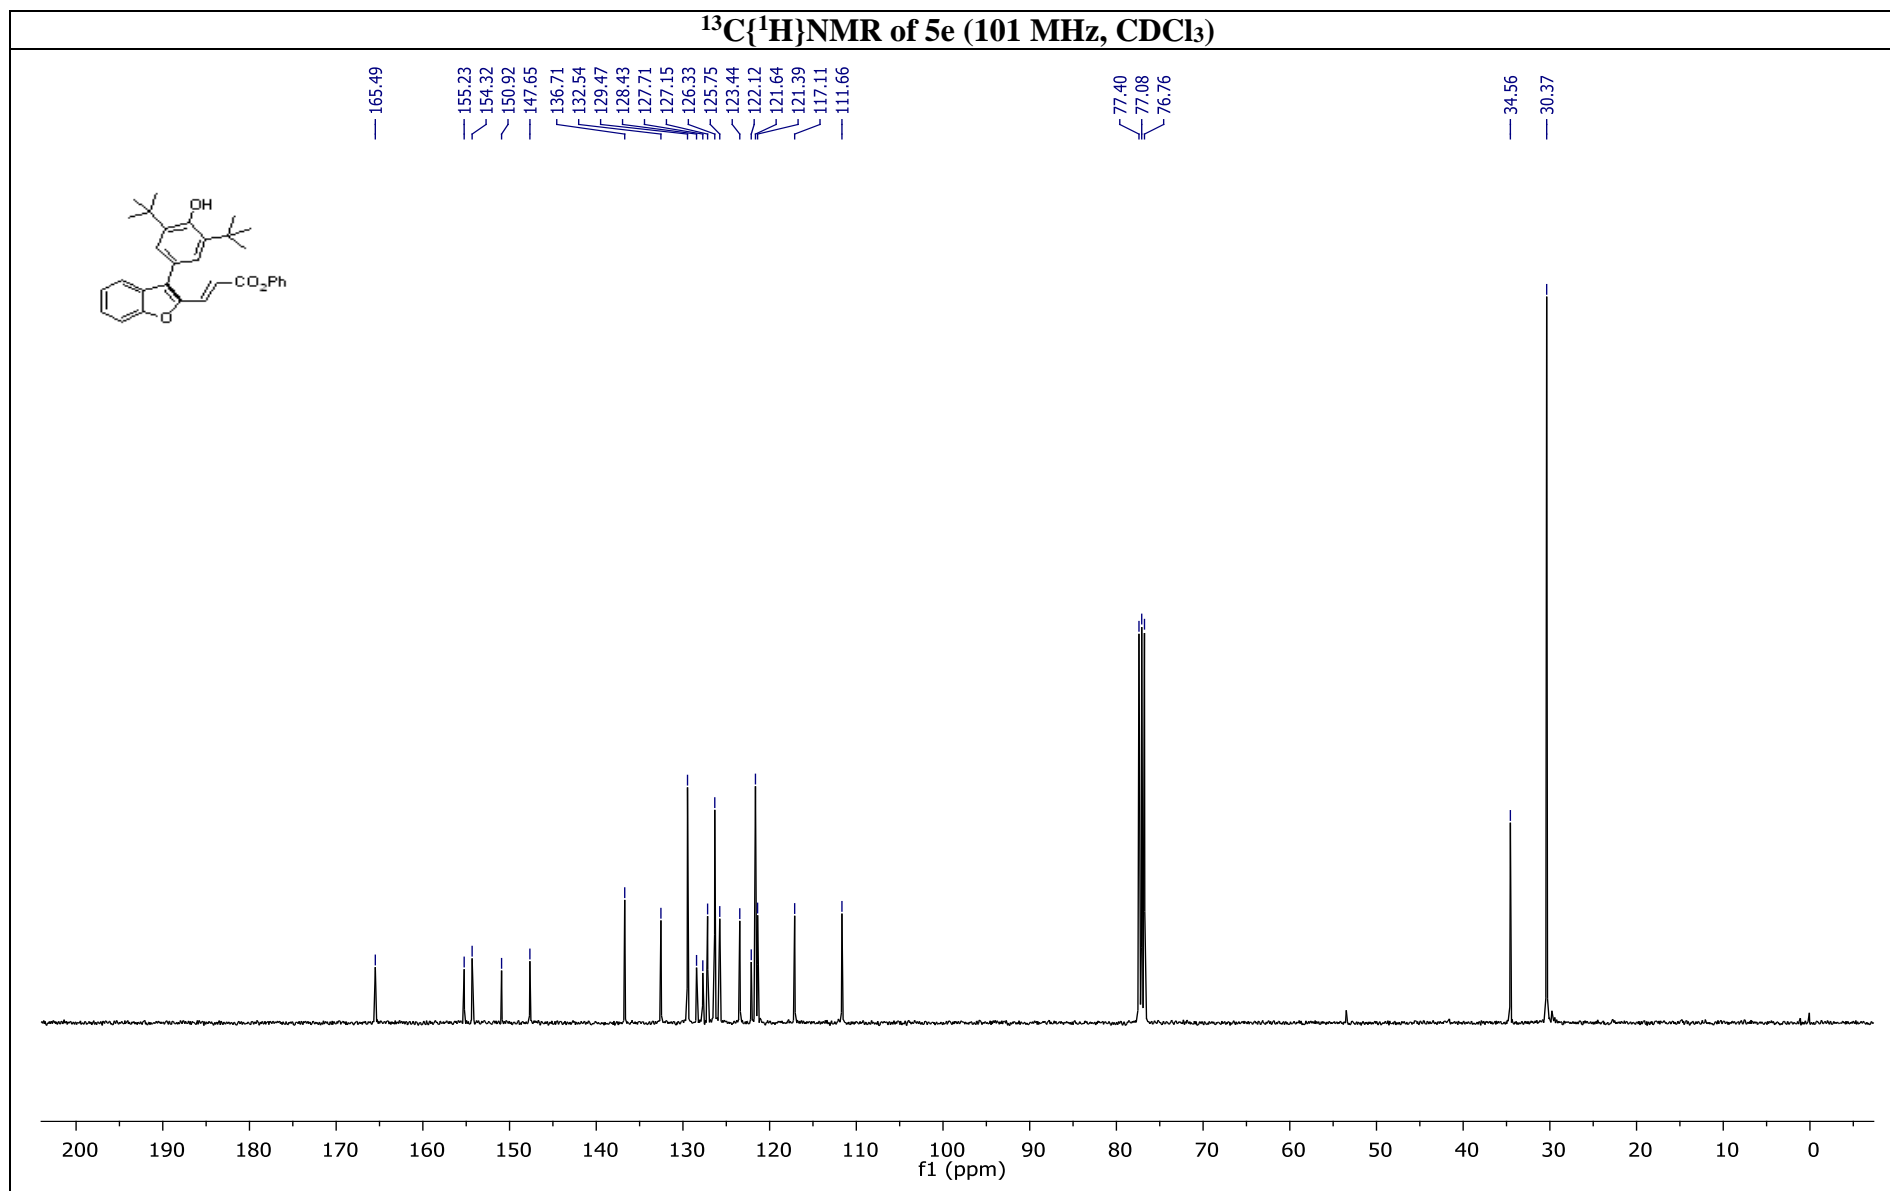

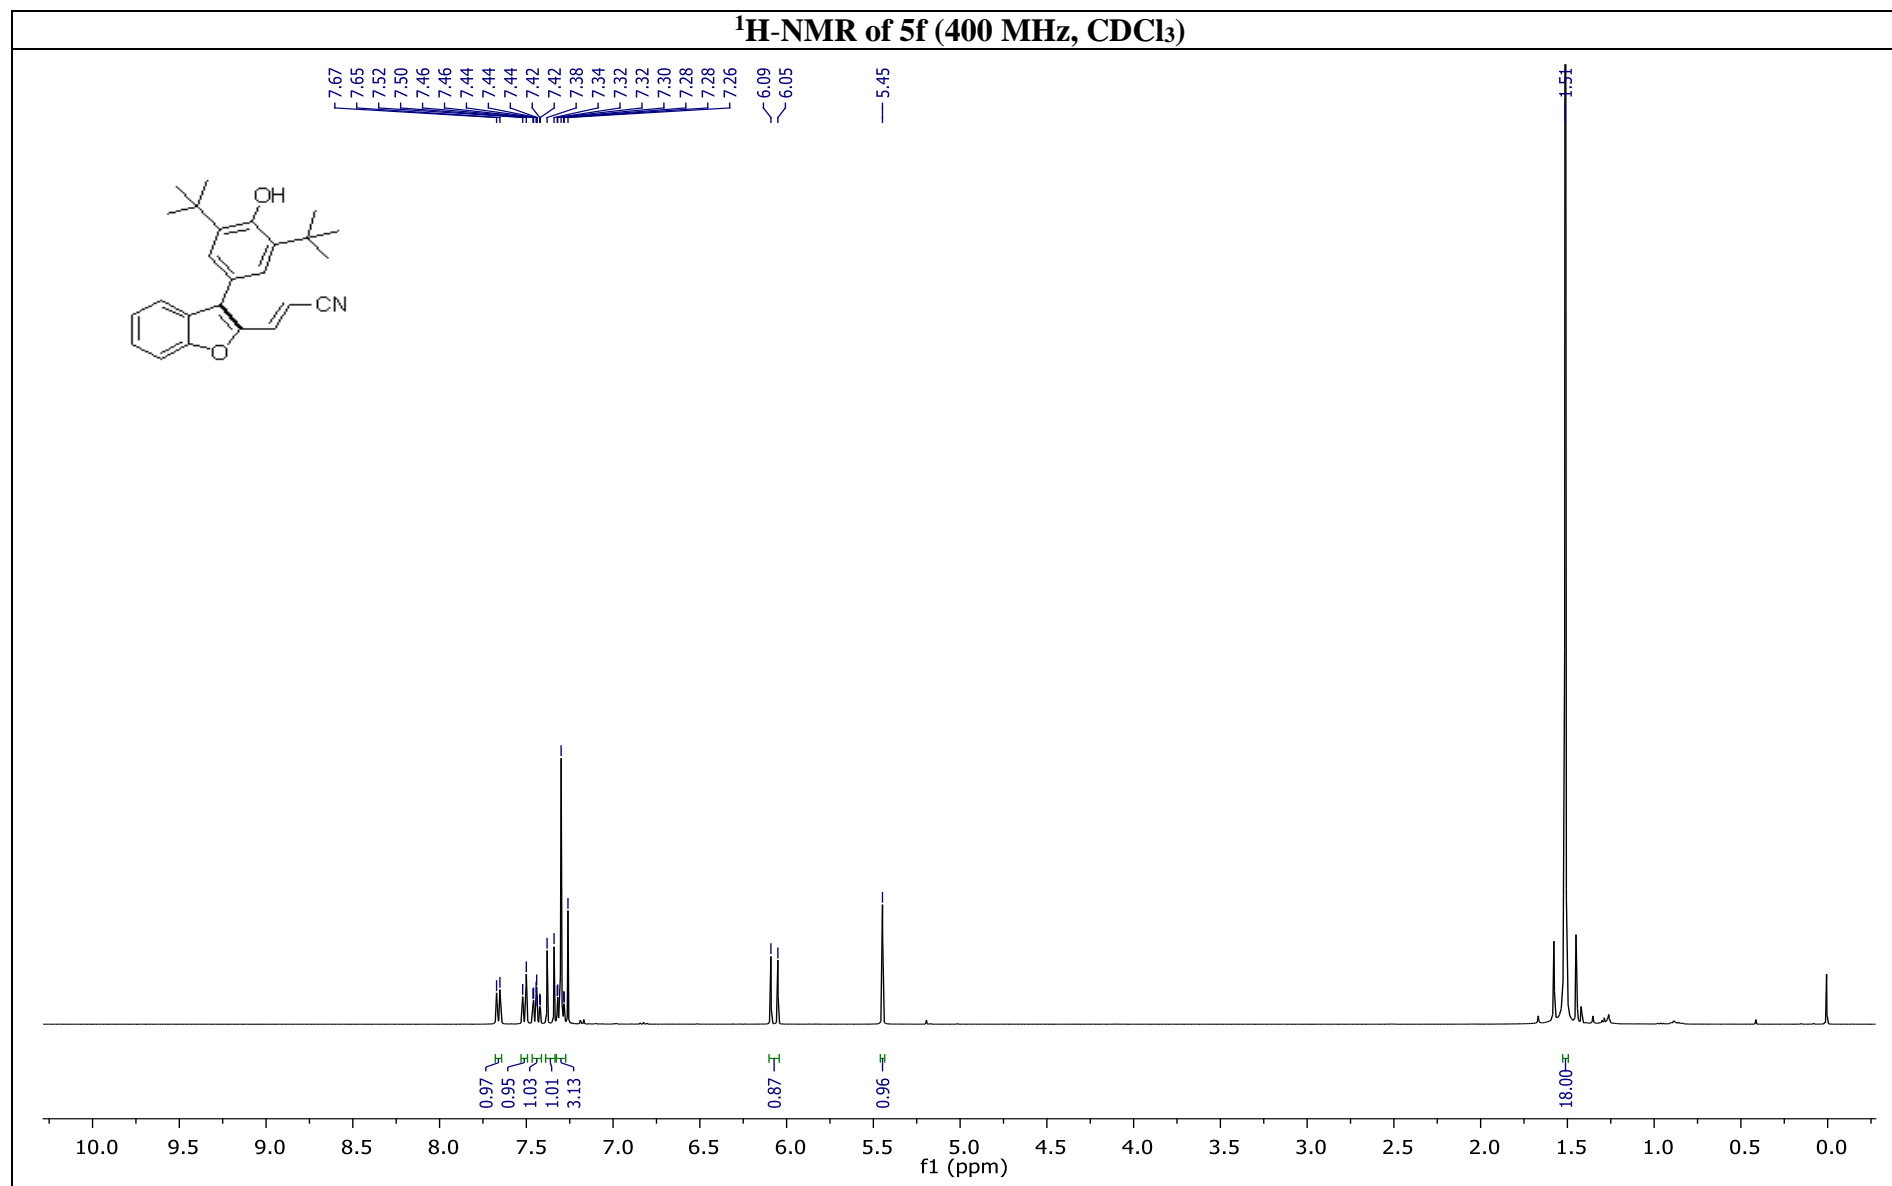

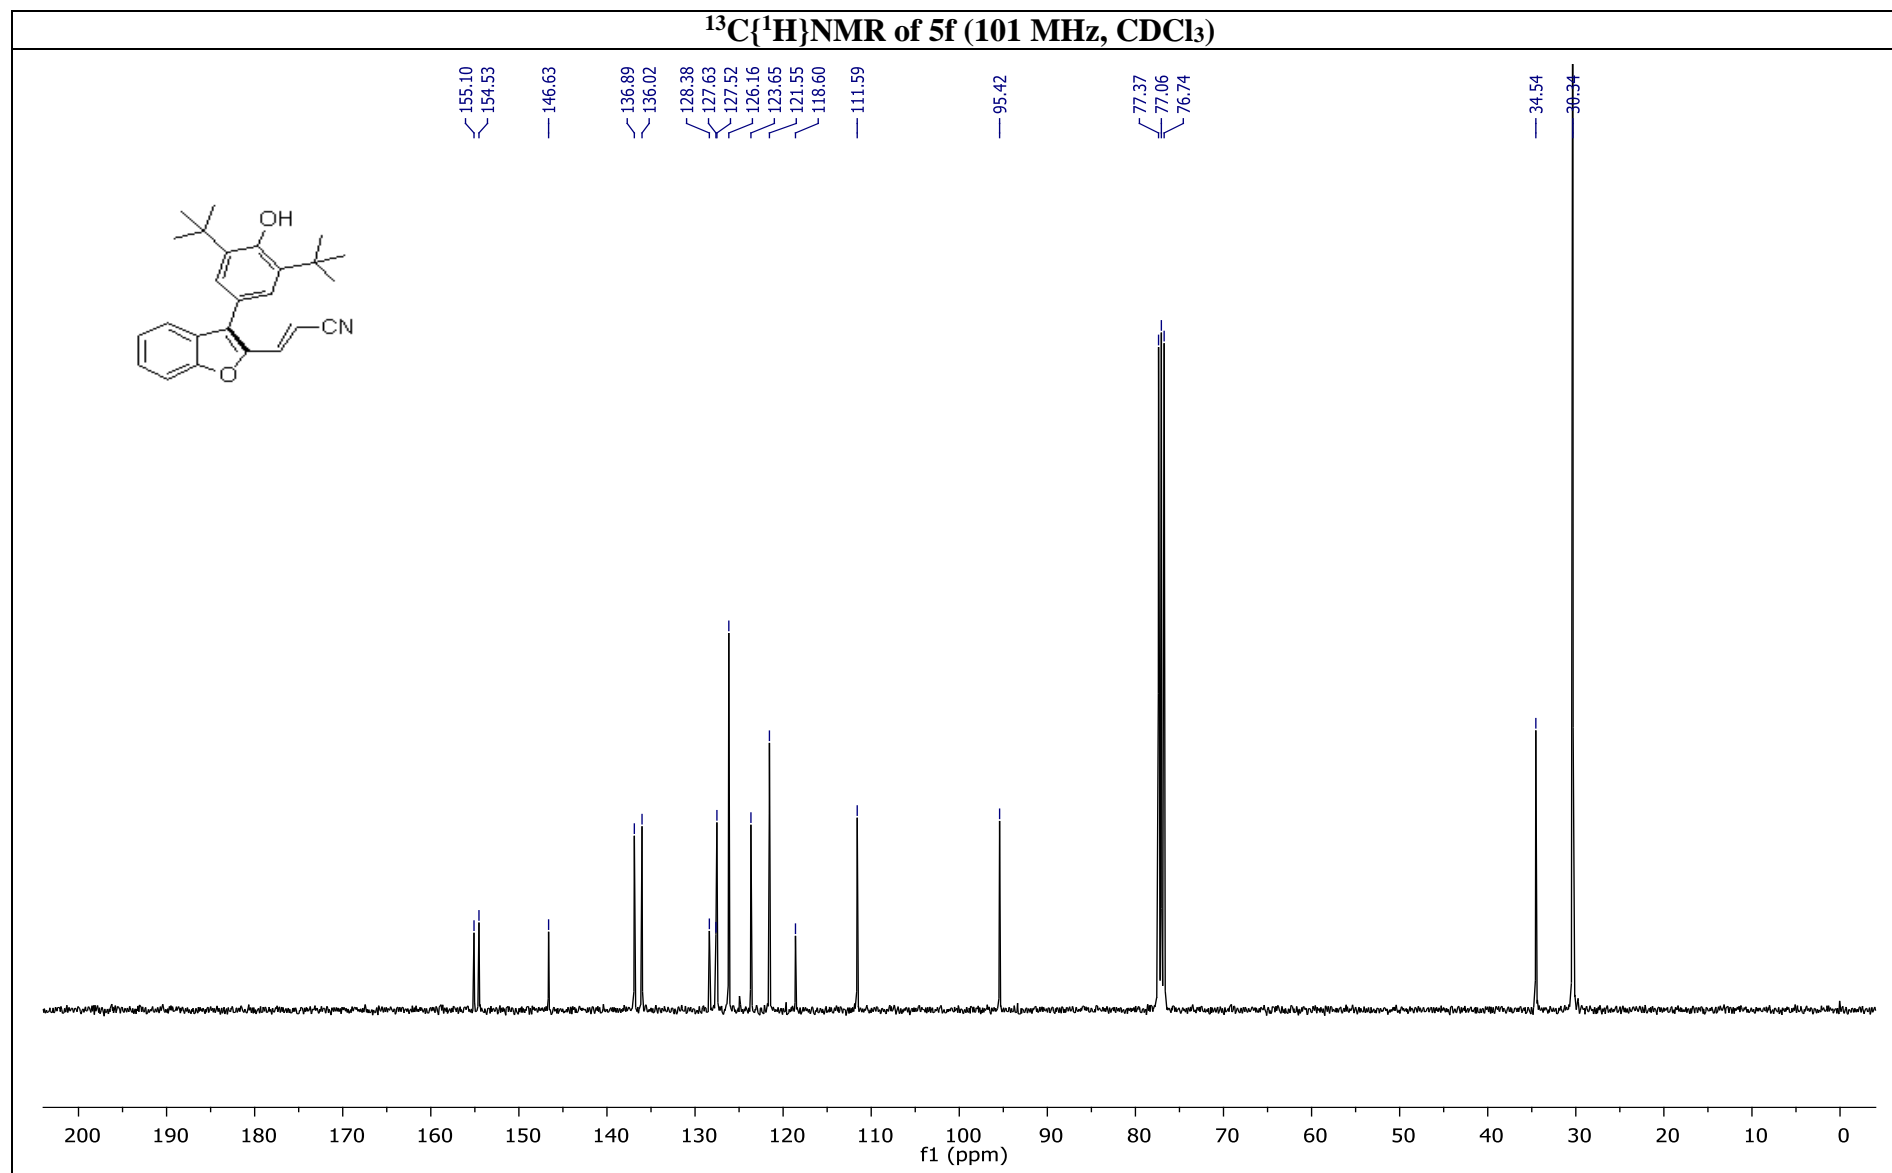

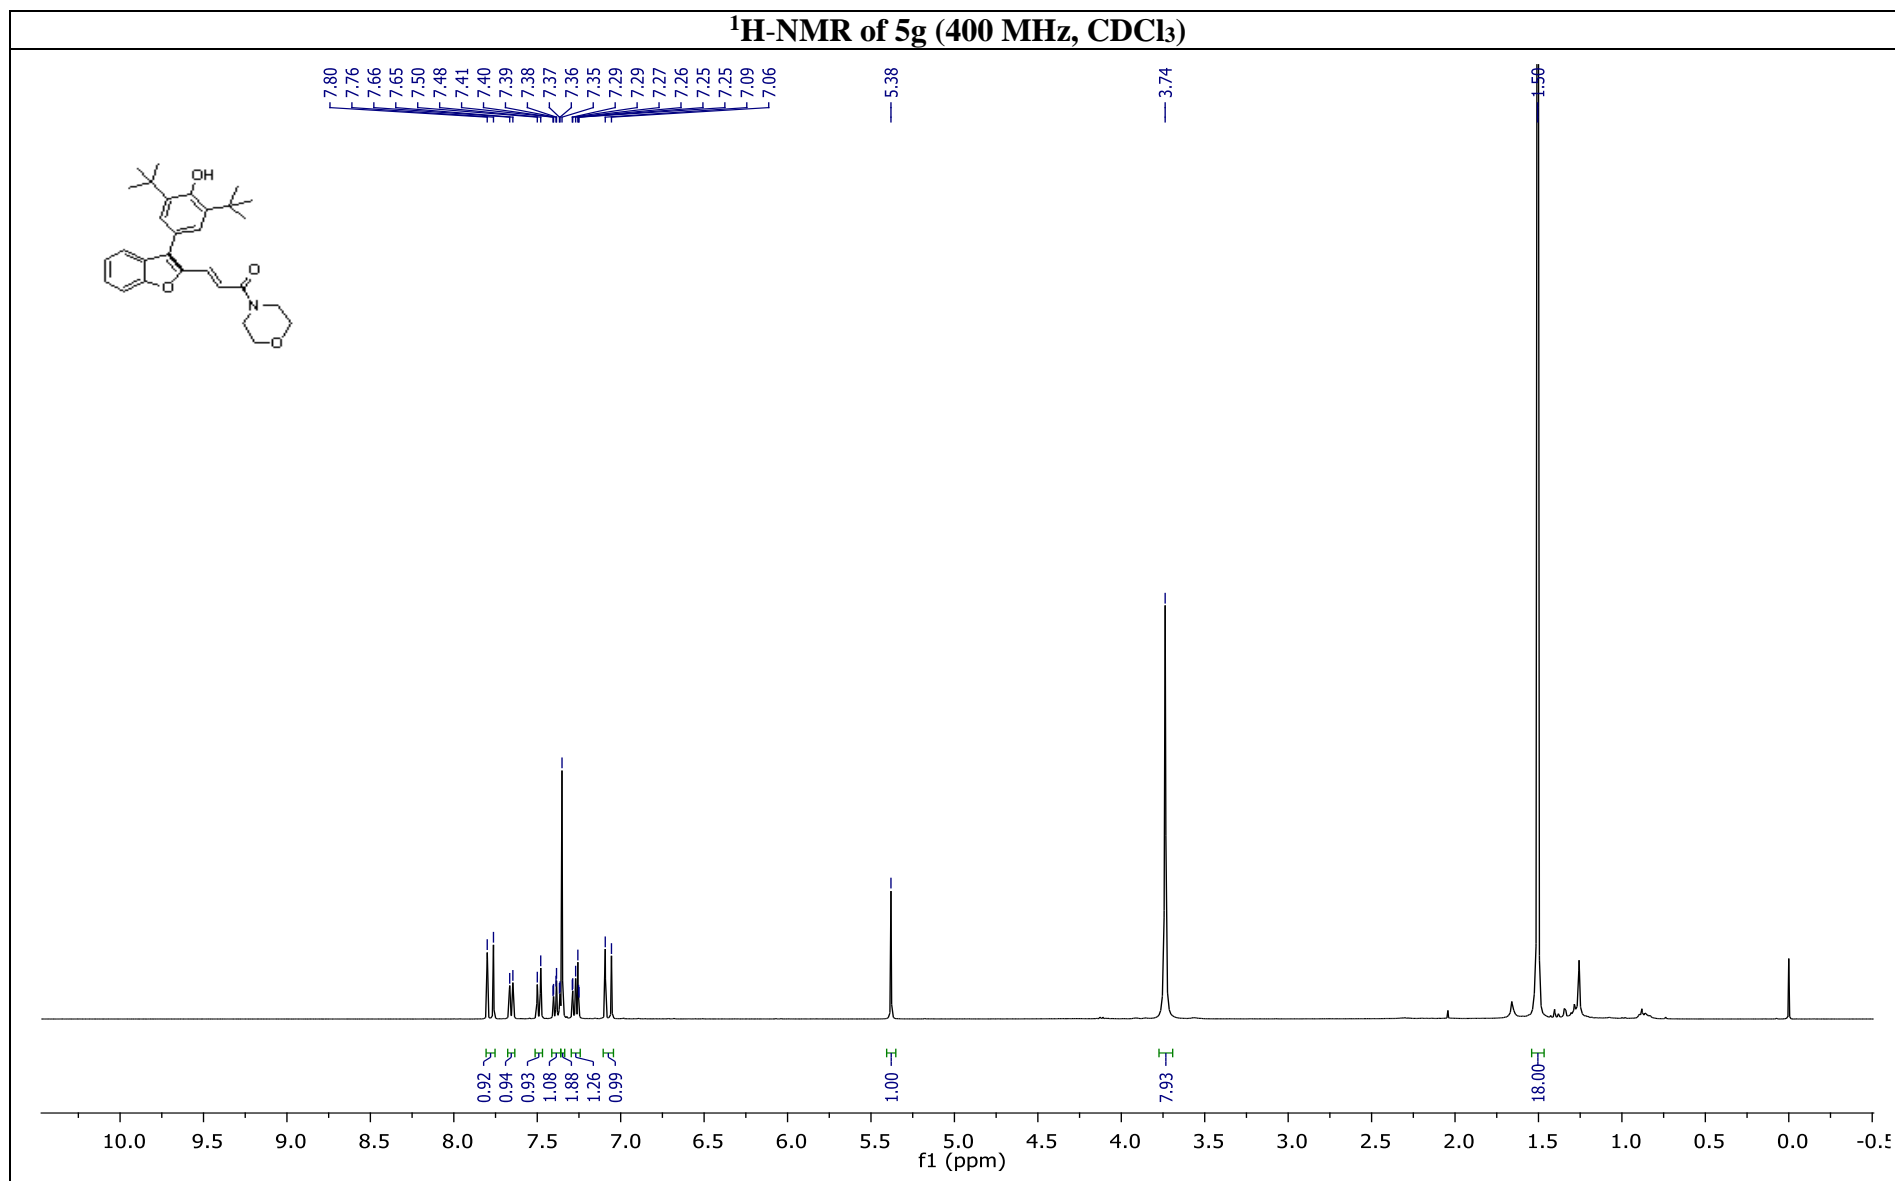

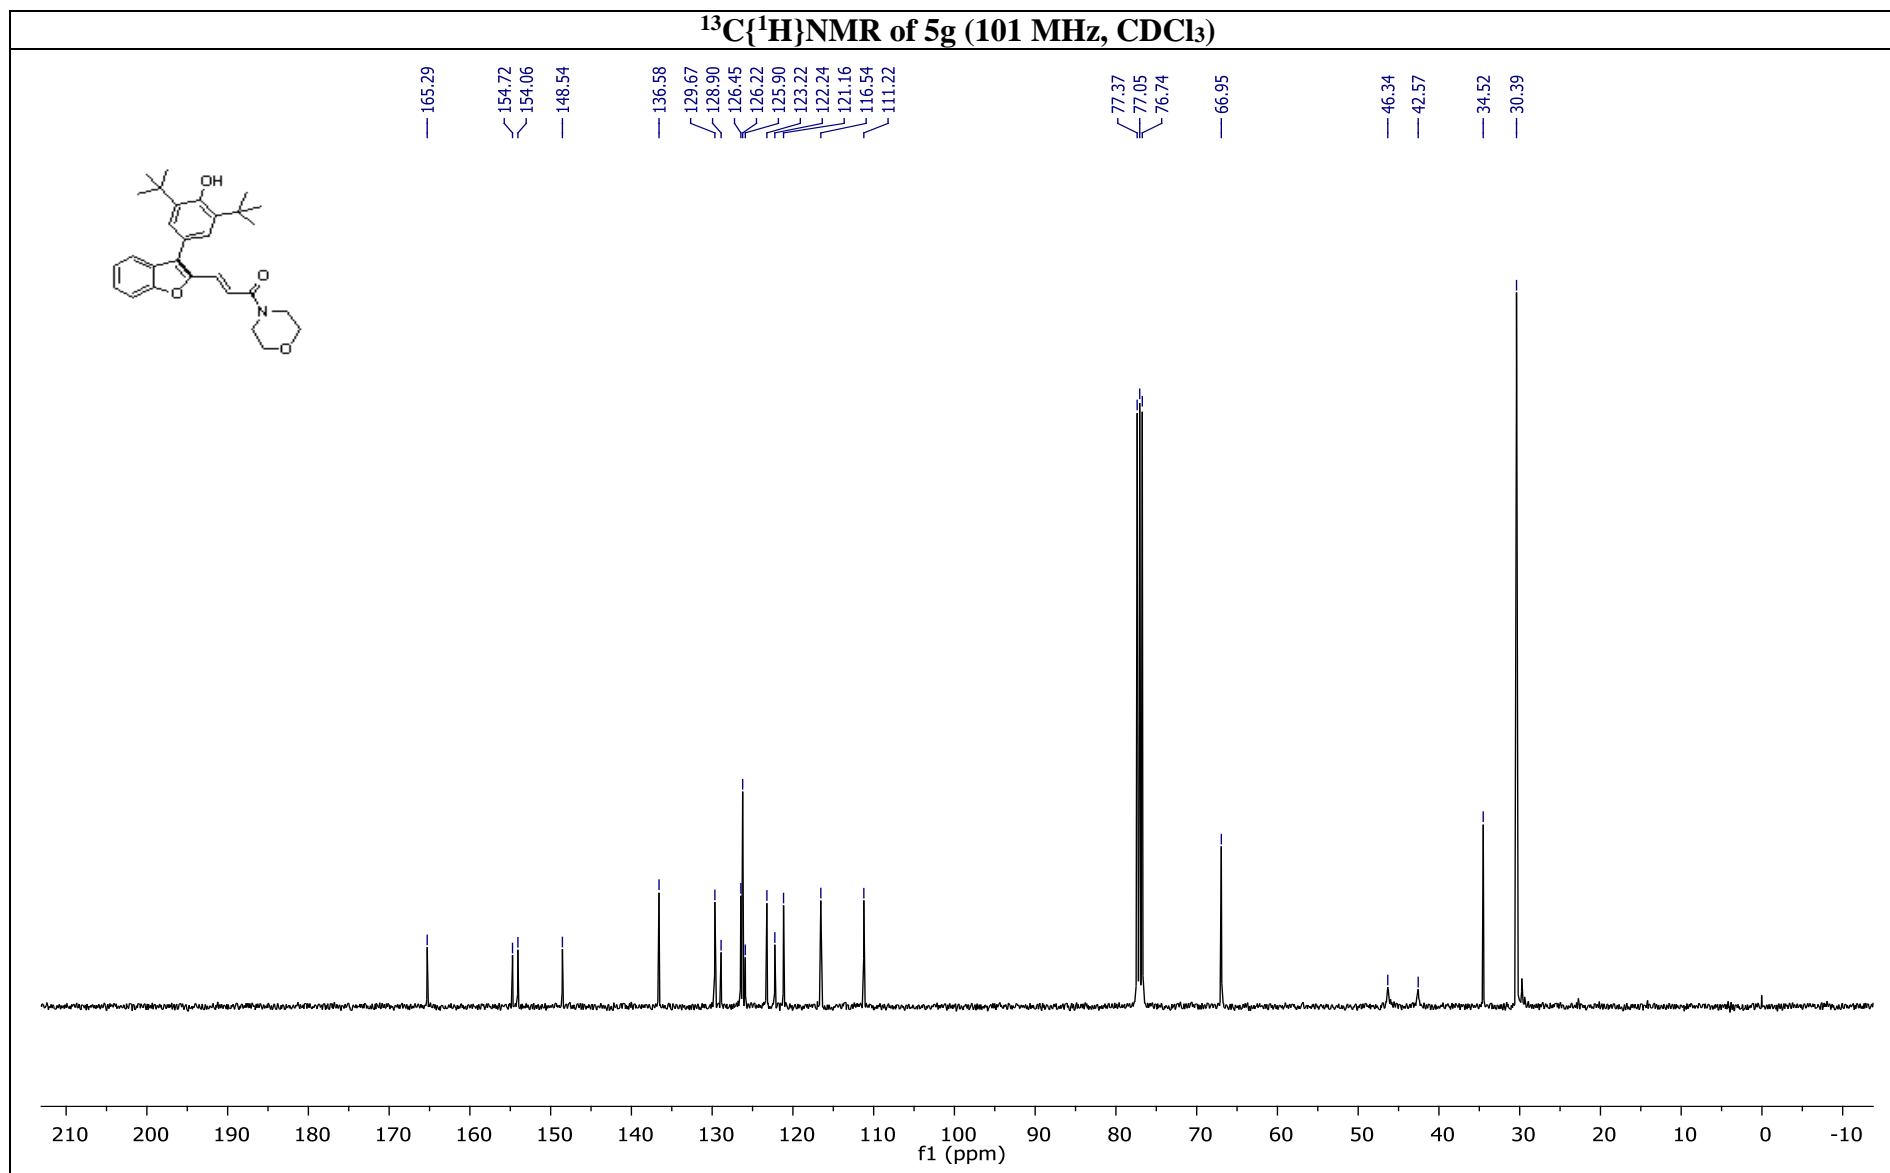

DEPT-NMR of 5g (135 MHz, CDCl<sub>3</sub>)

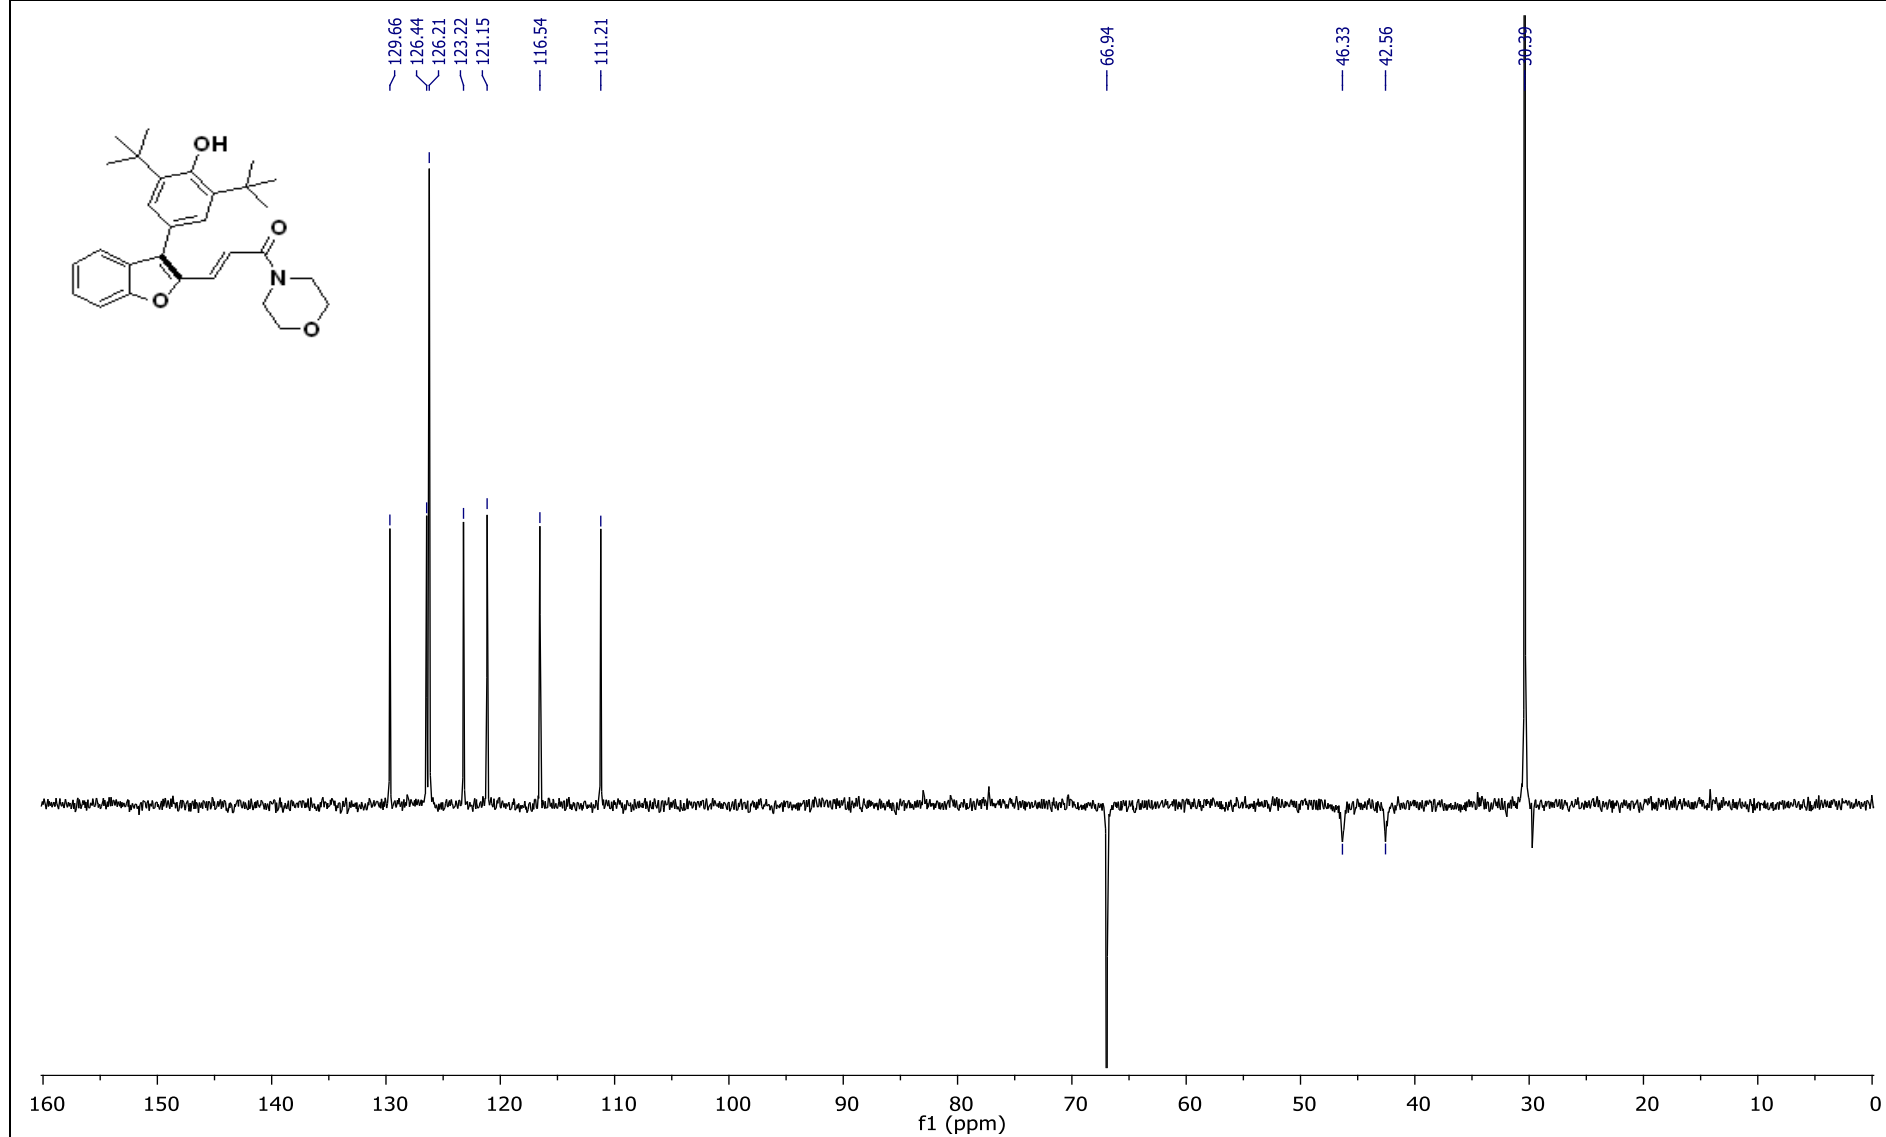

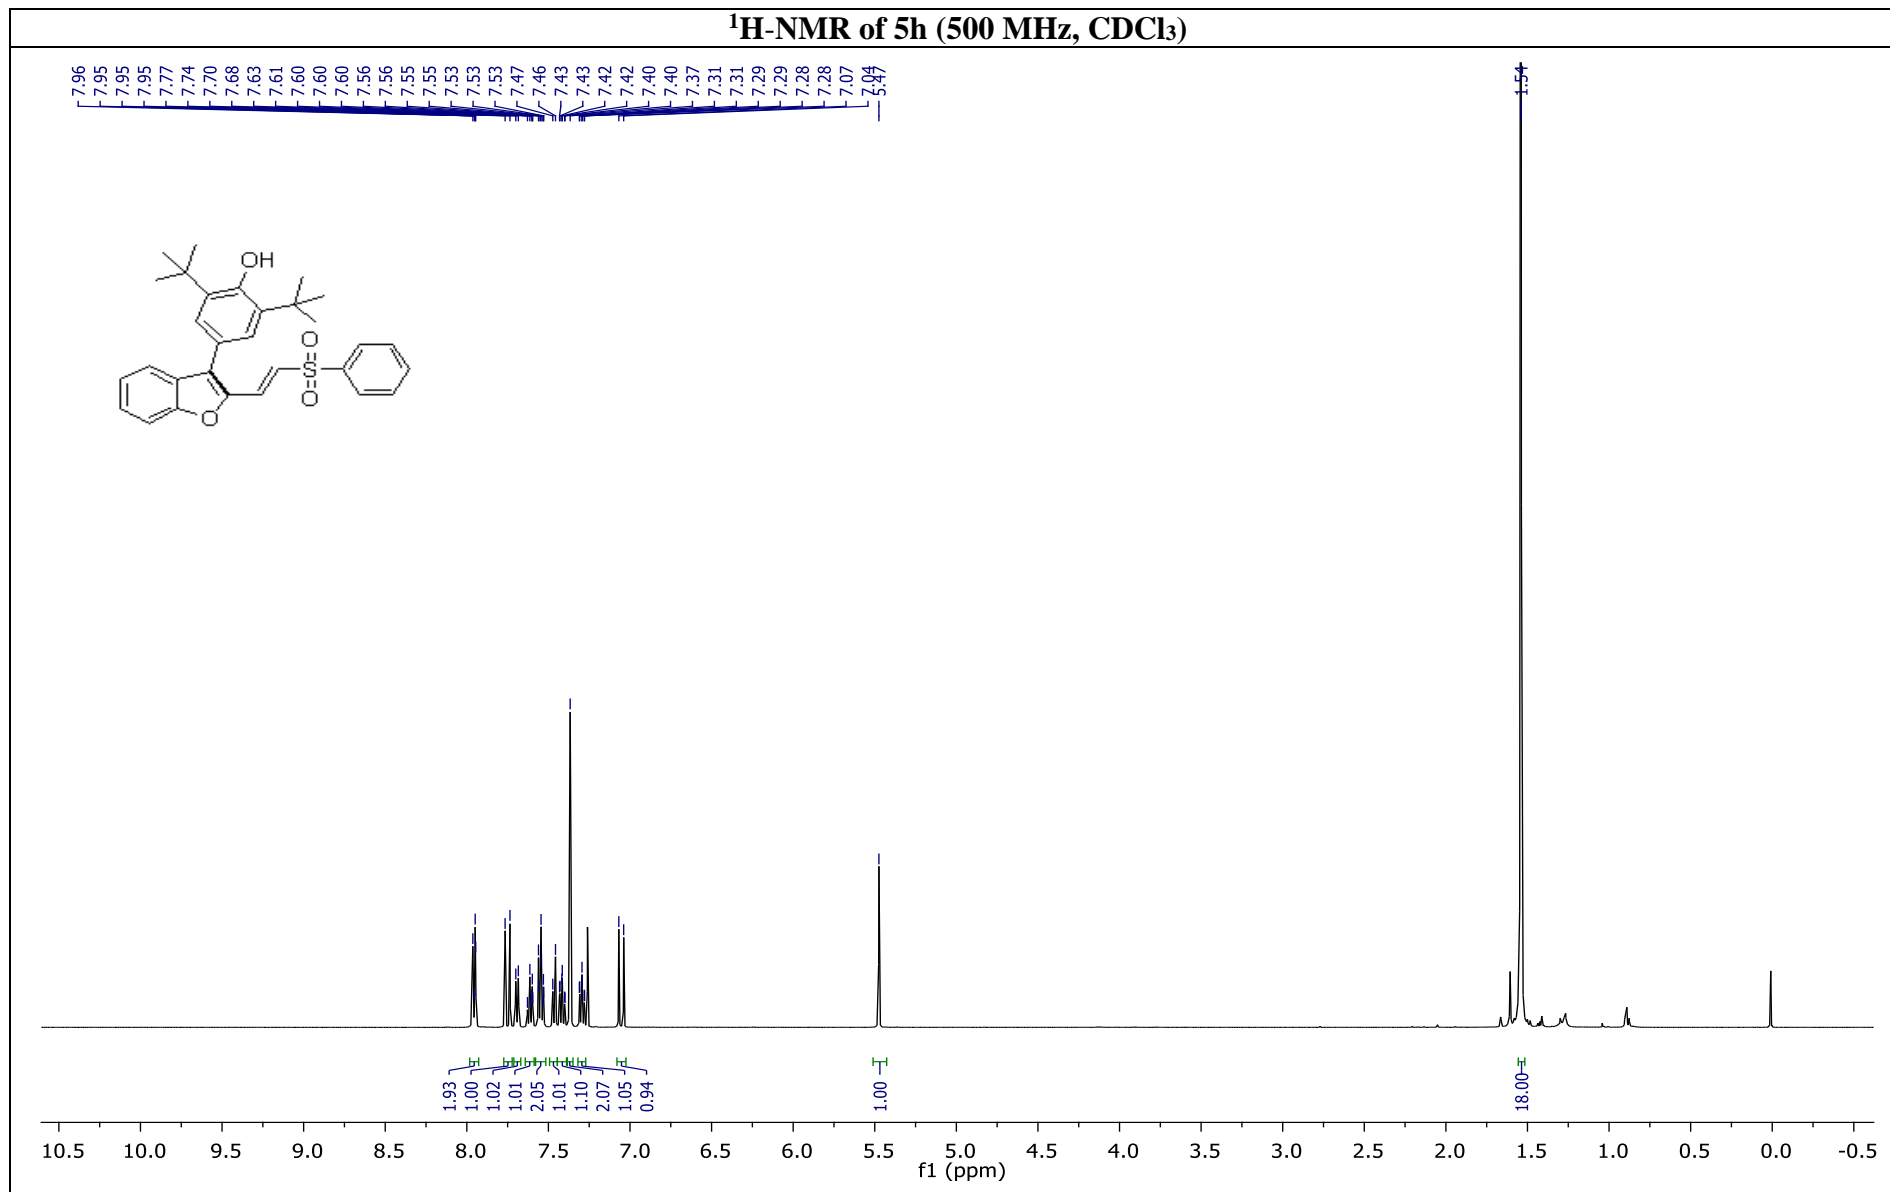

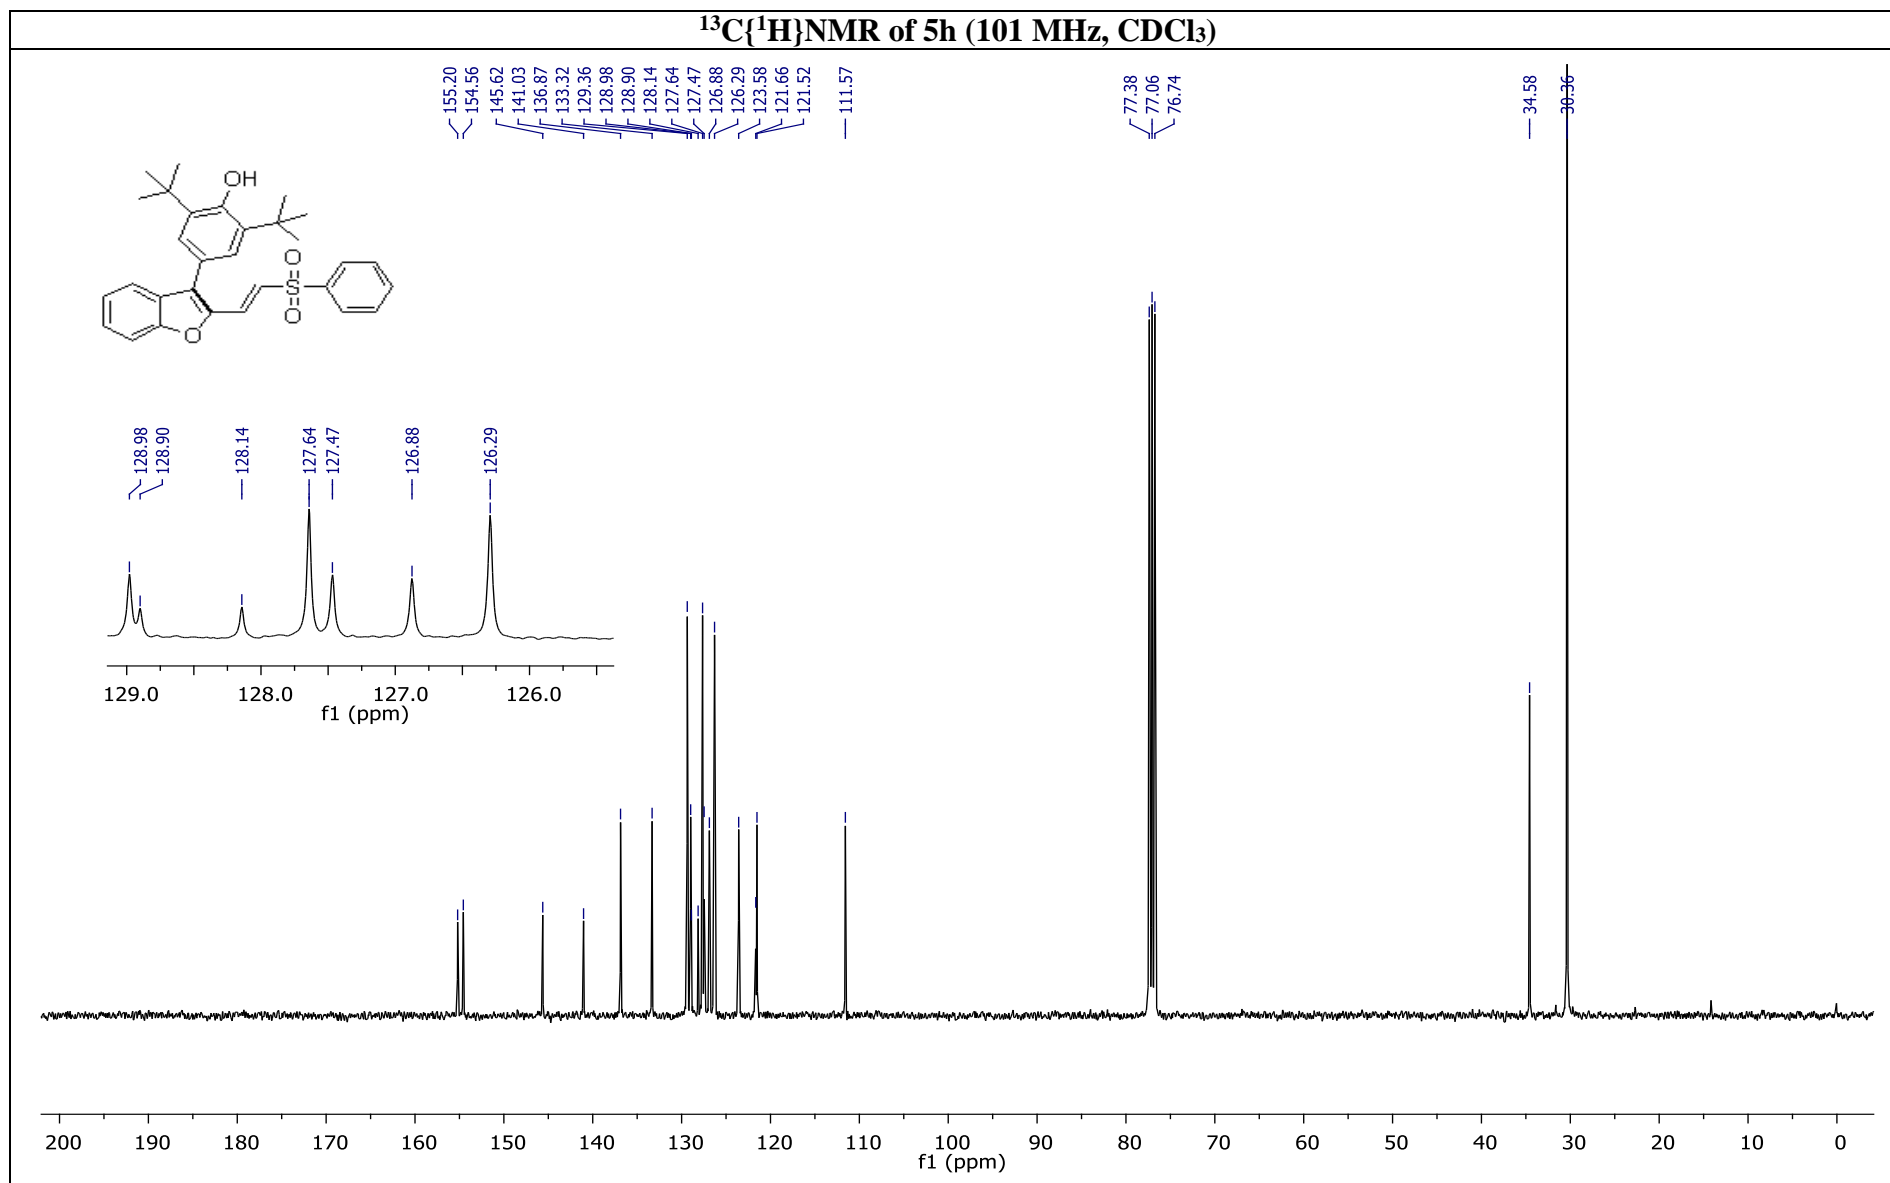

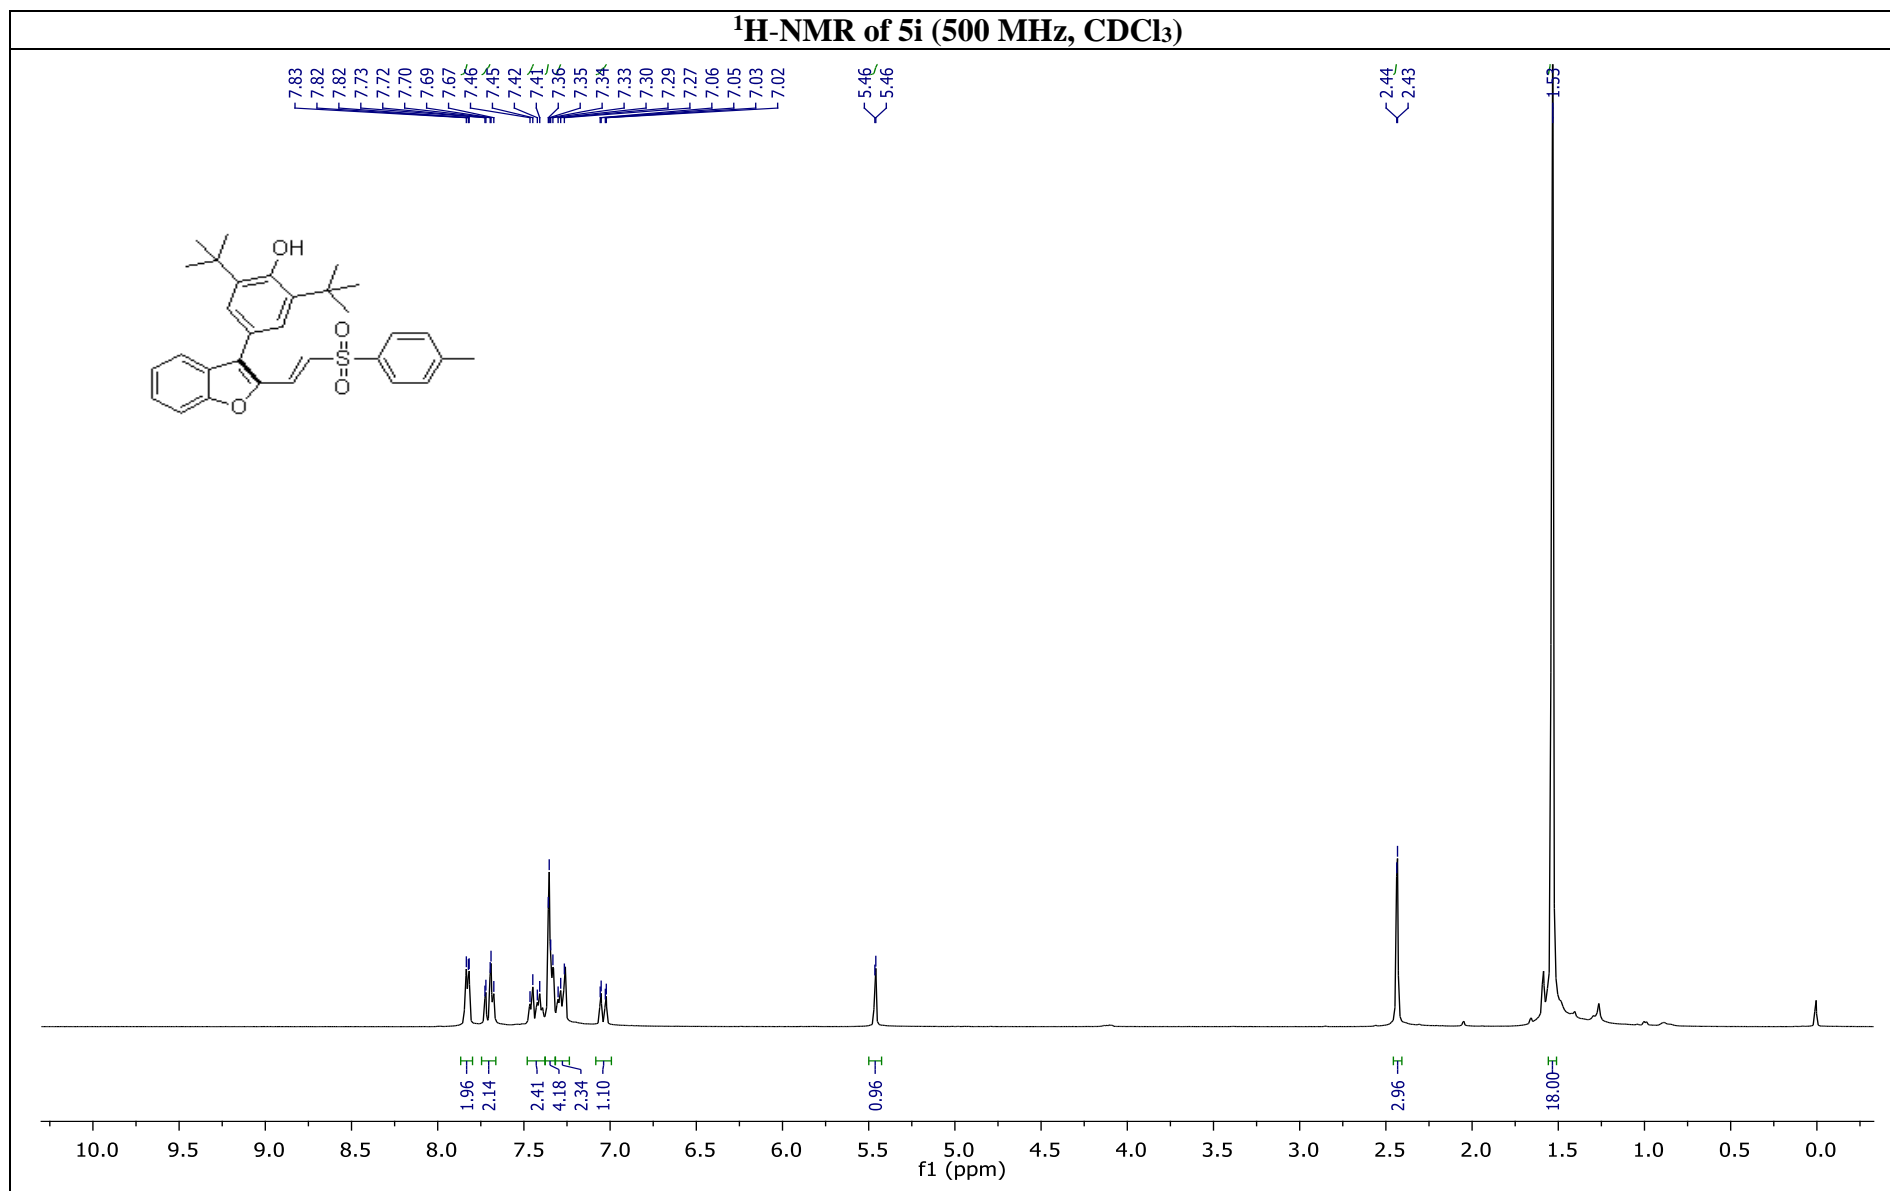

**$^{13}\text{C}\{^1\text{H}\}$ NMR of 5i (101 MHz,  $\text{CDCl}_3$ )**

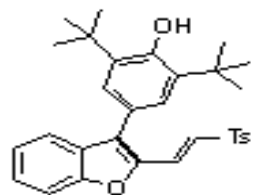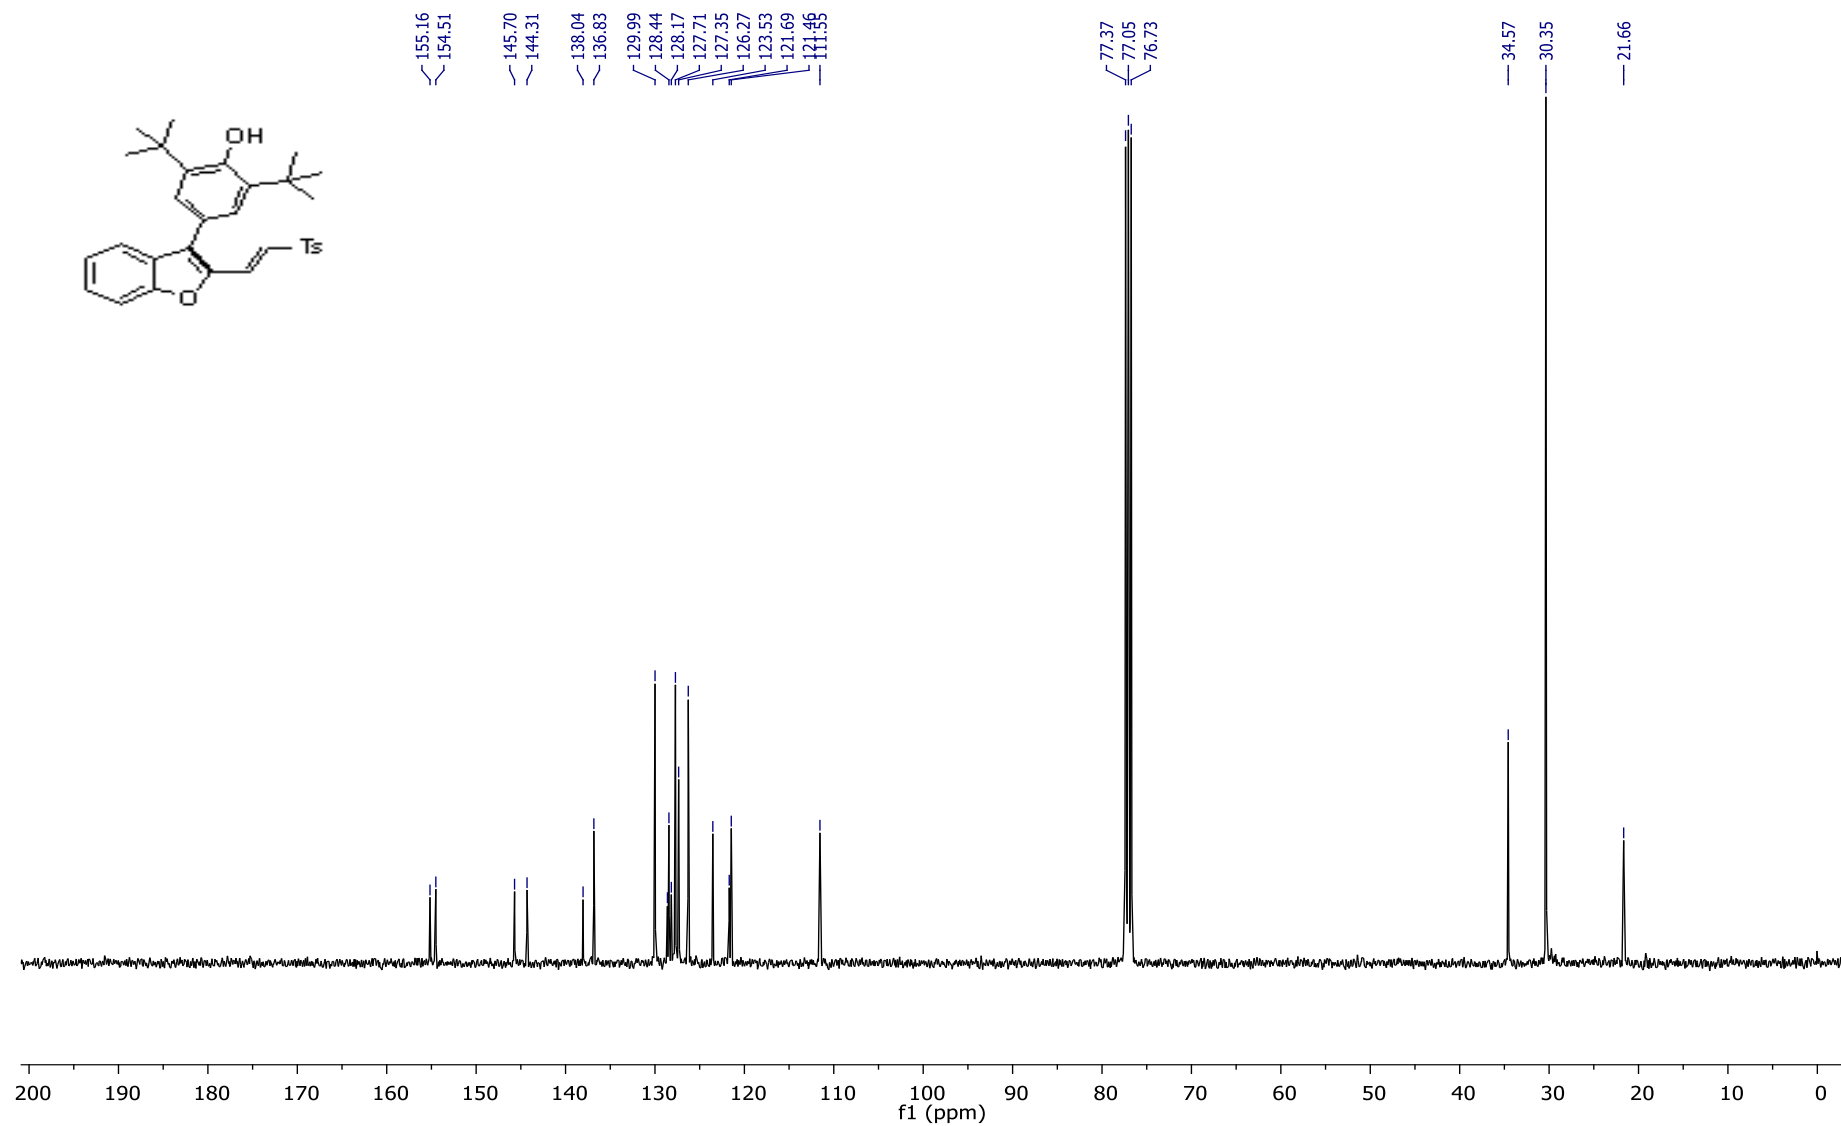

DEPT-NMR of 5i (135 MHz, CDCl<sub>3</sub>)

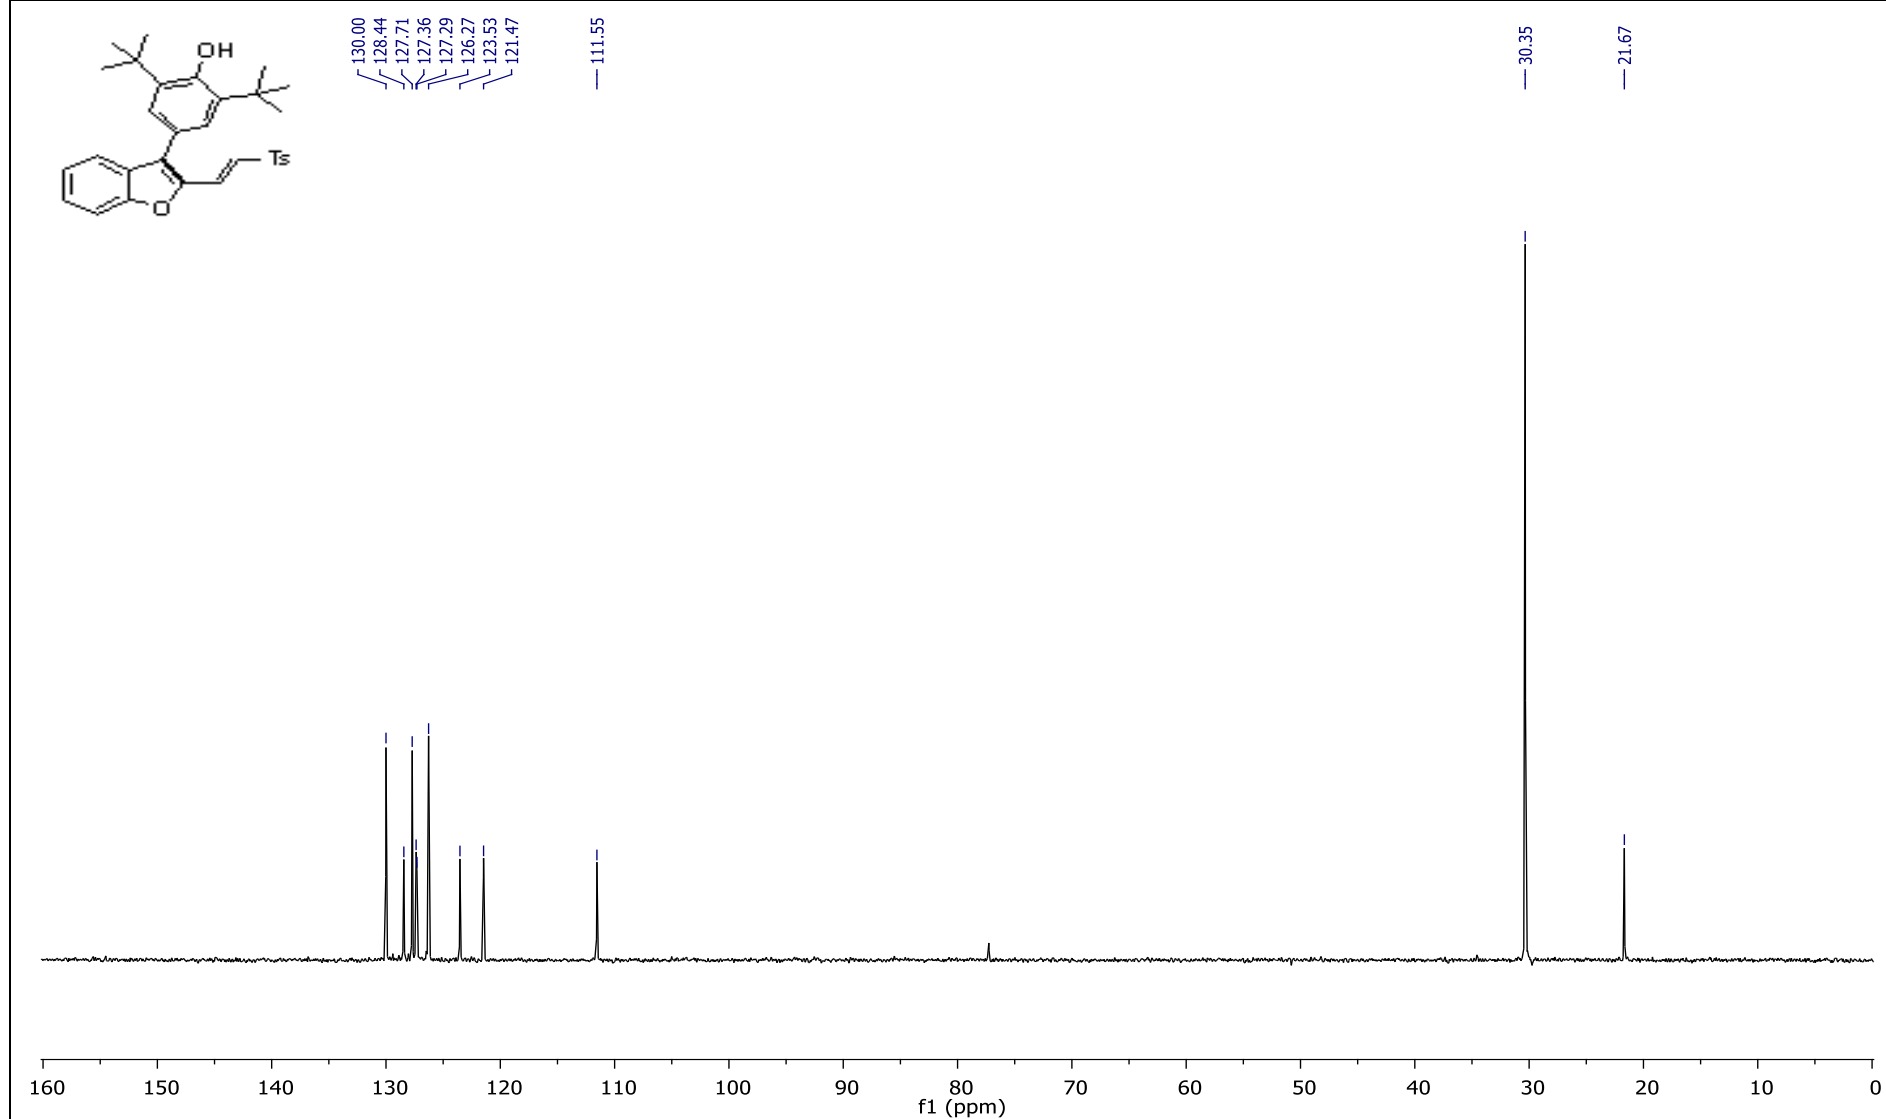

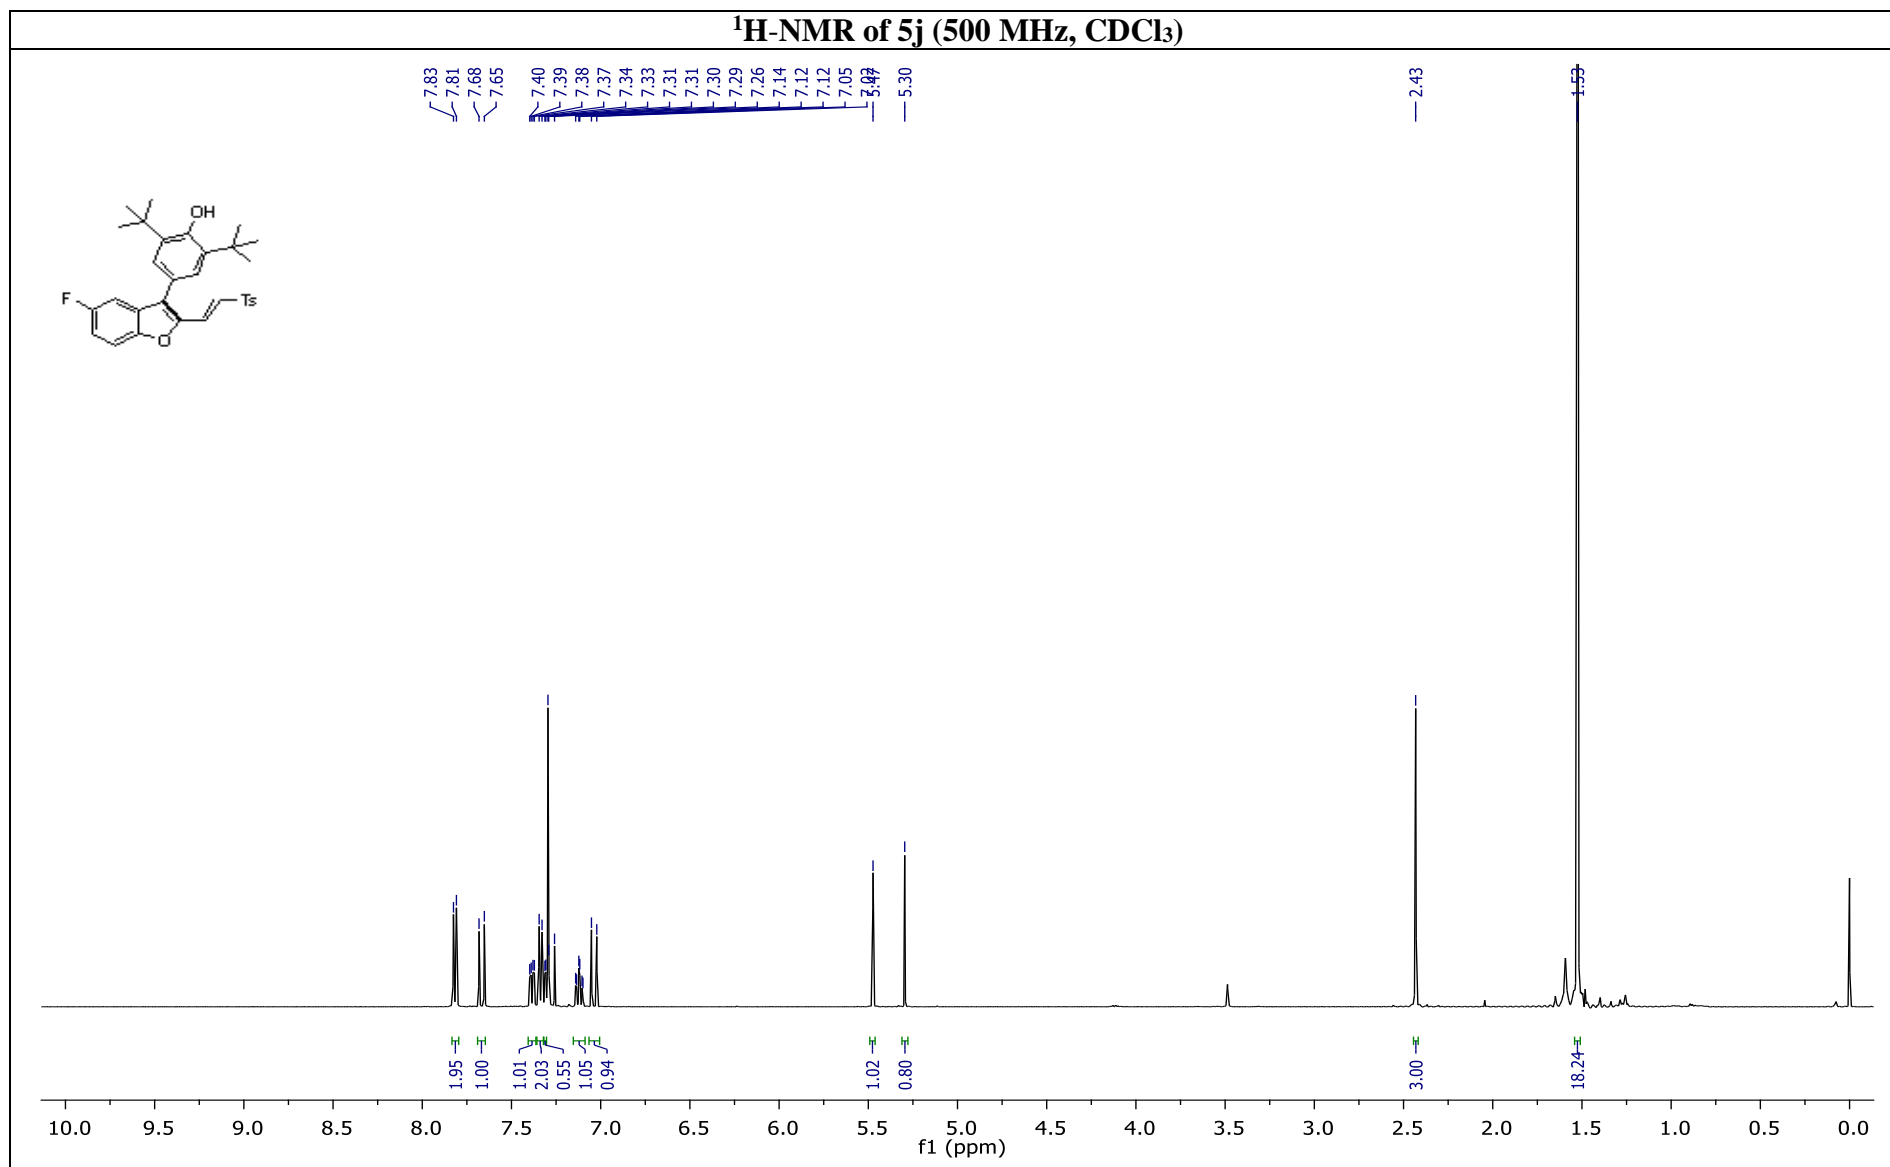

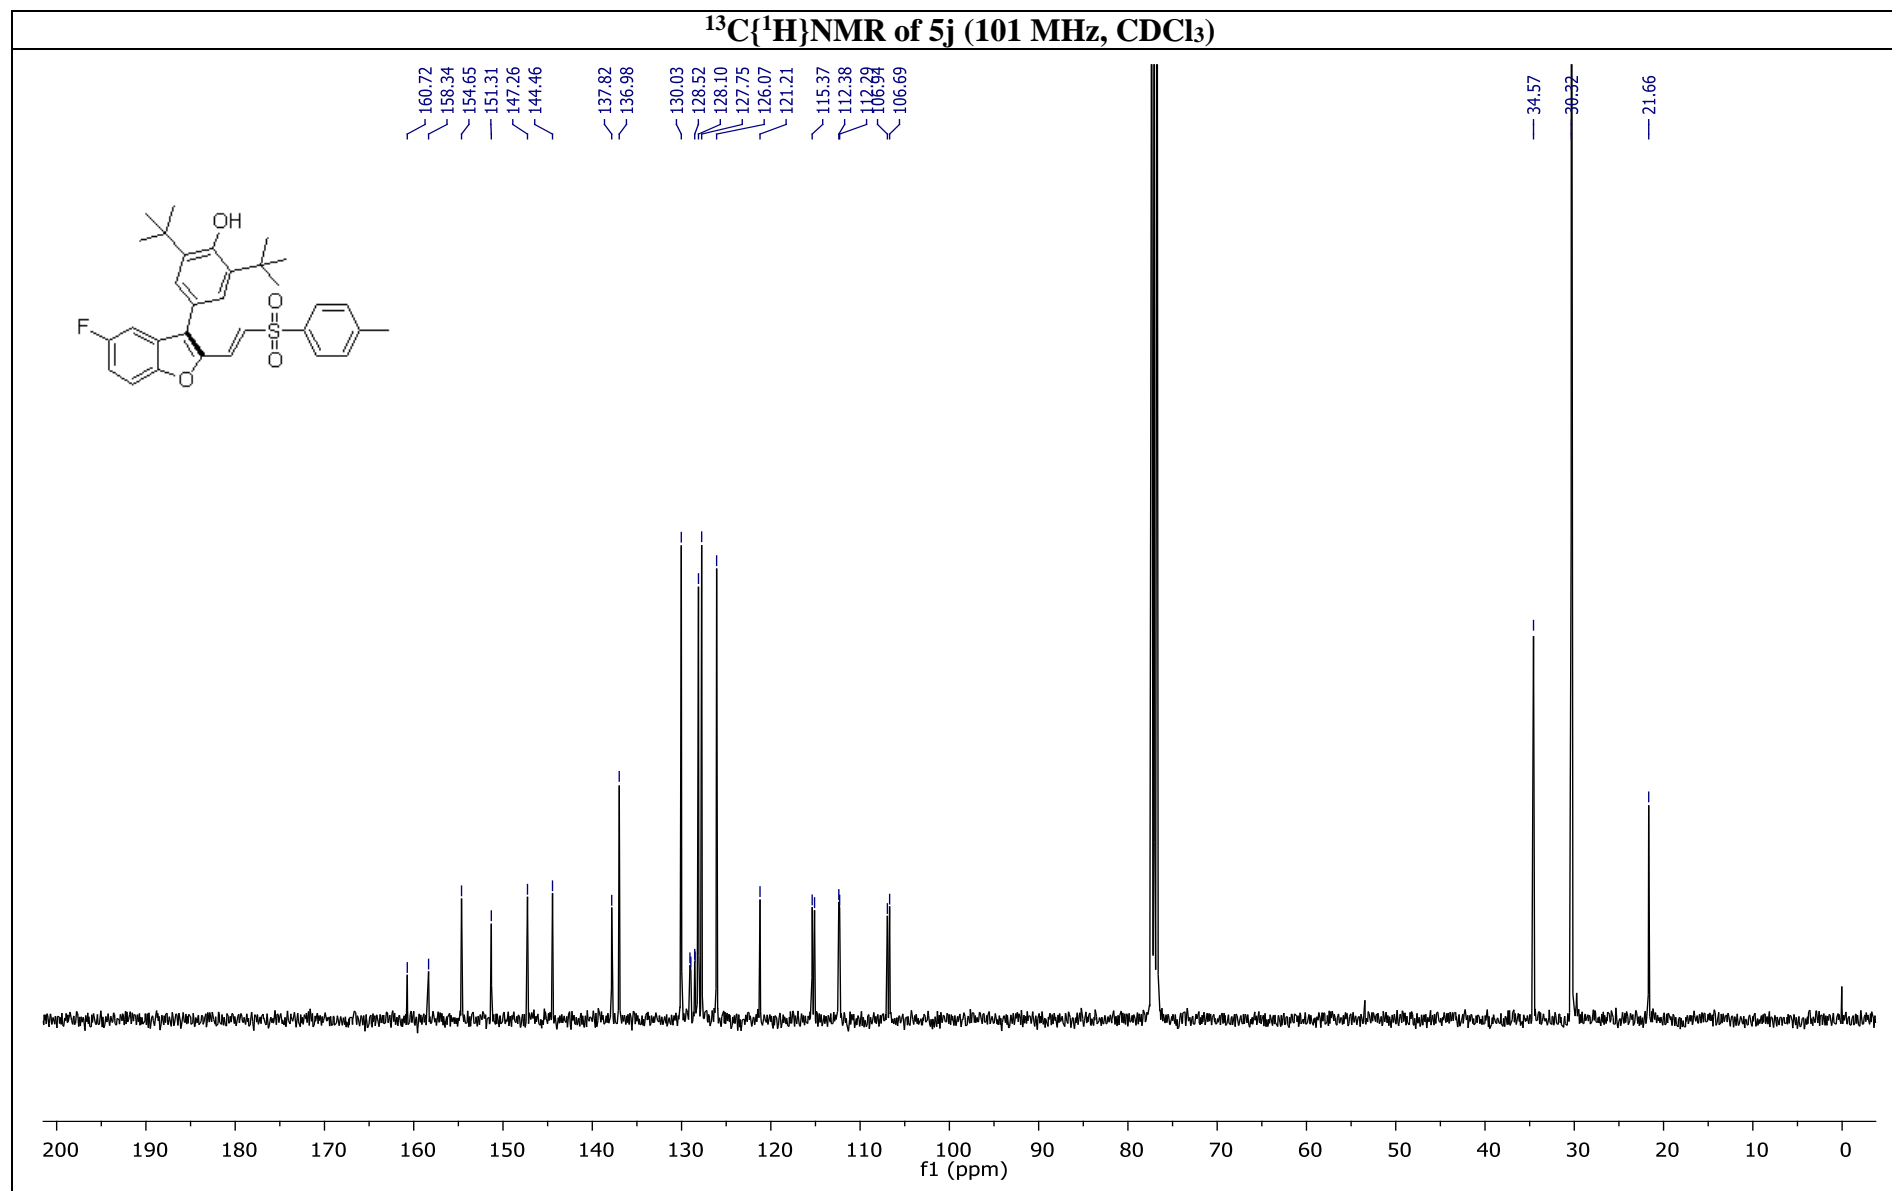

DEPT-NMR of 5j (135 MHz, CDCl<sub>3</sub>)

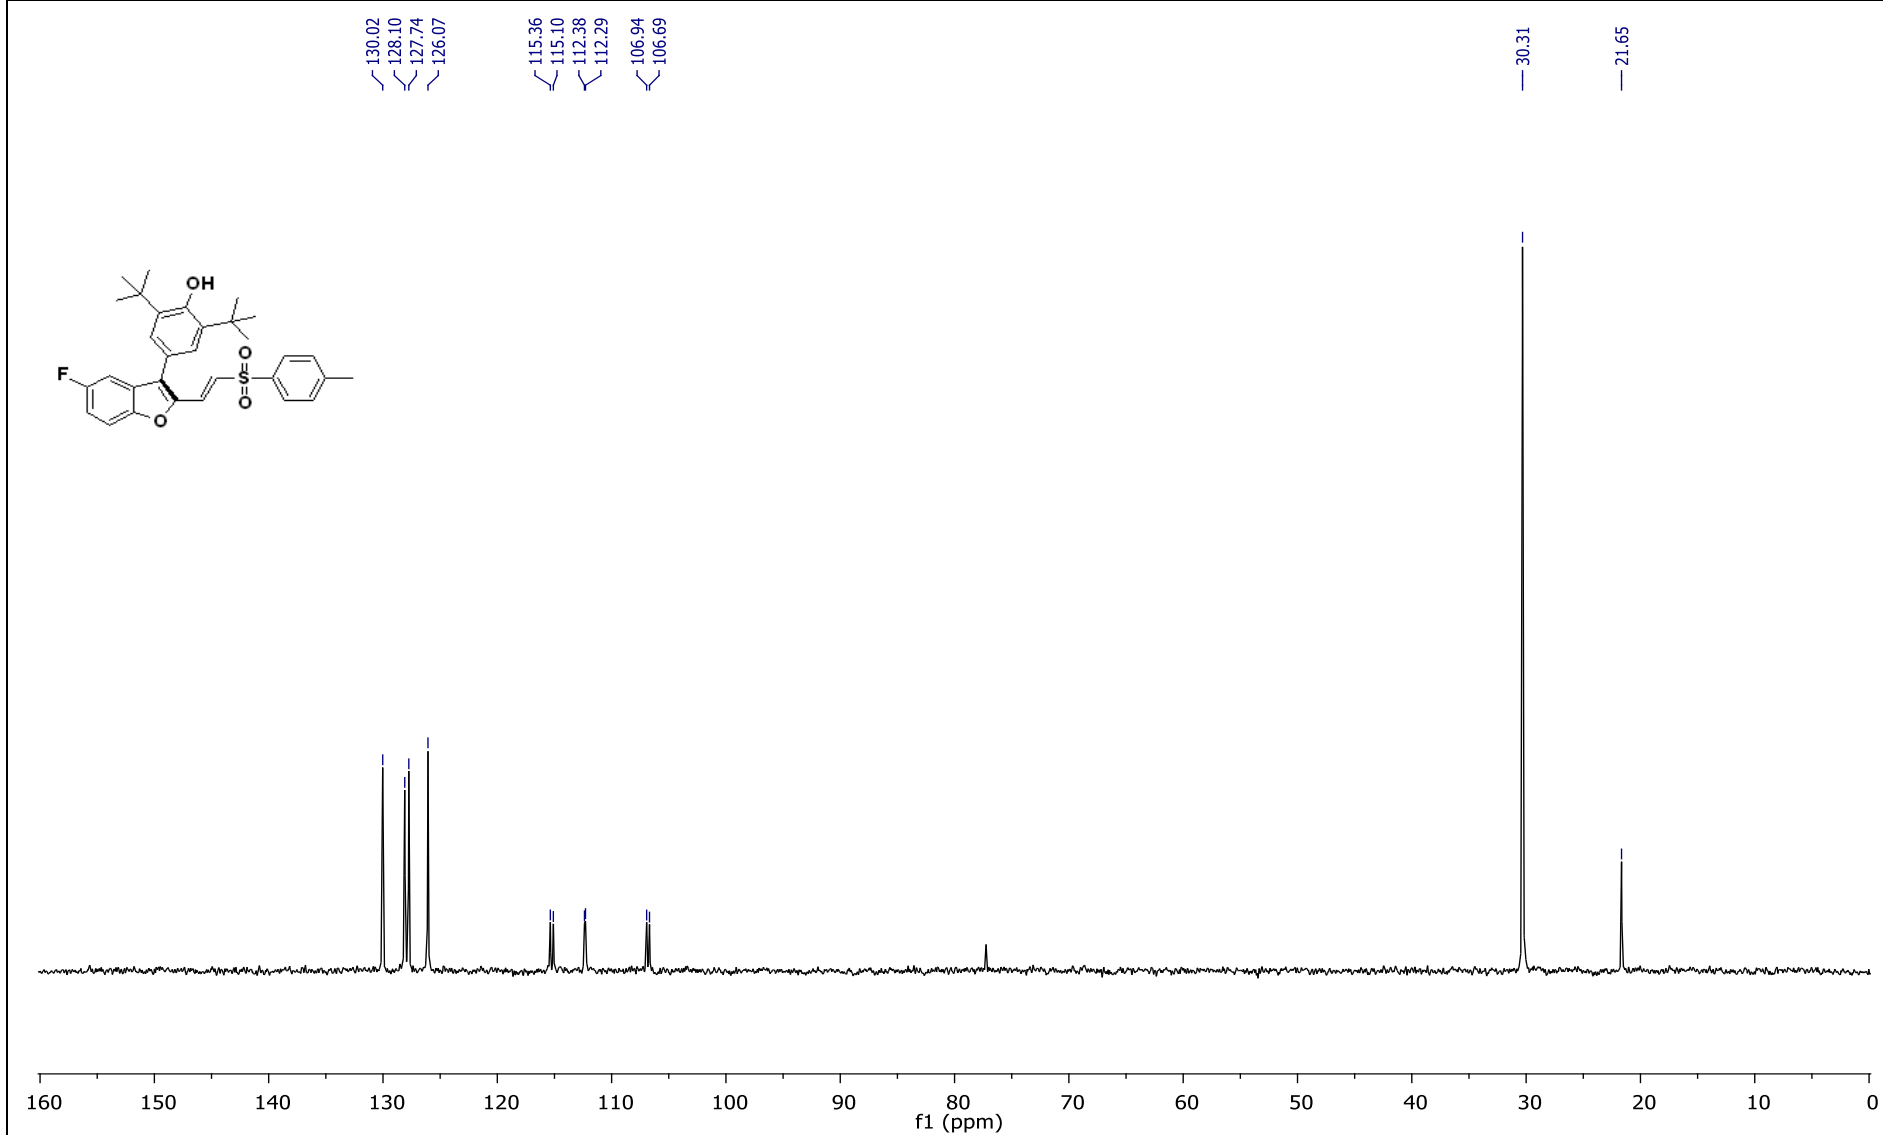

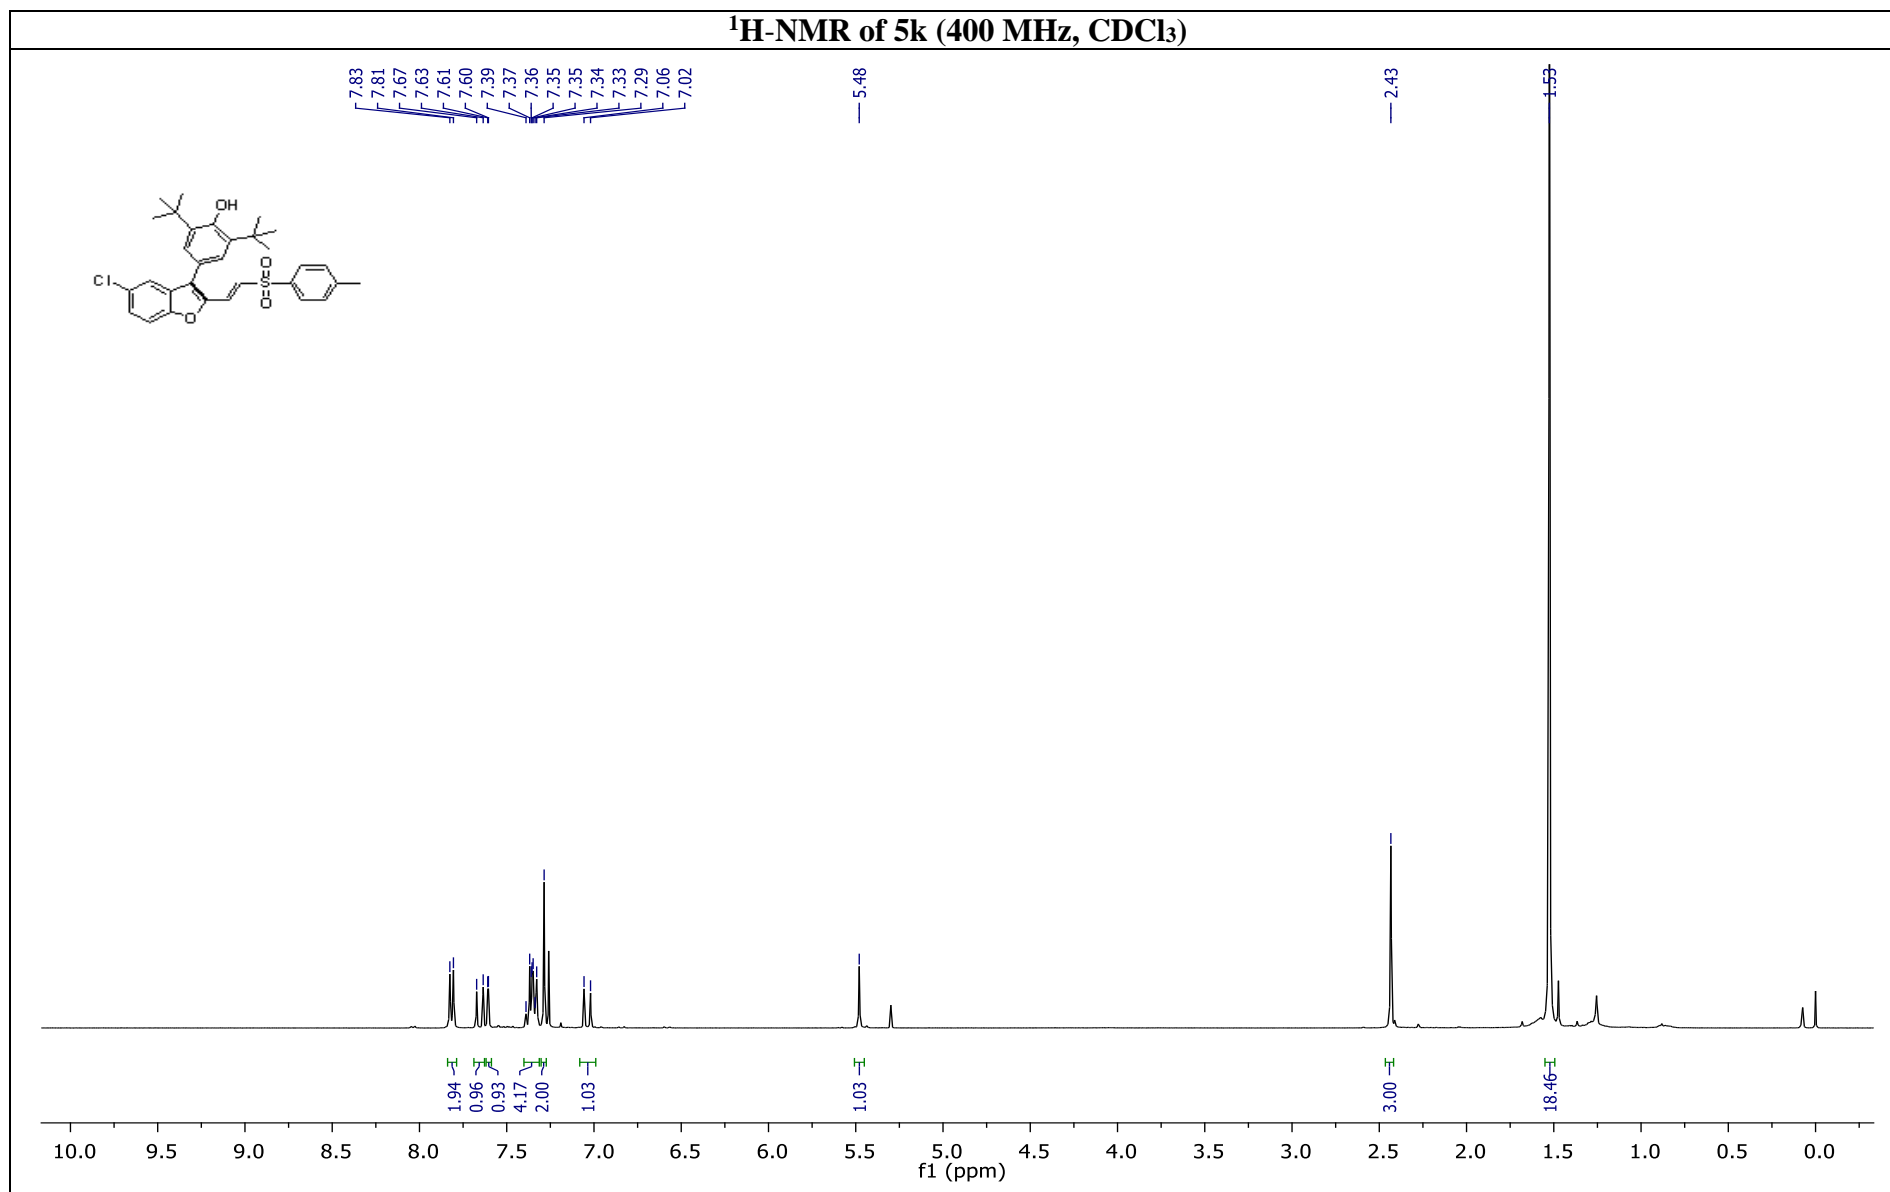

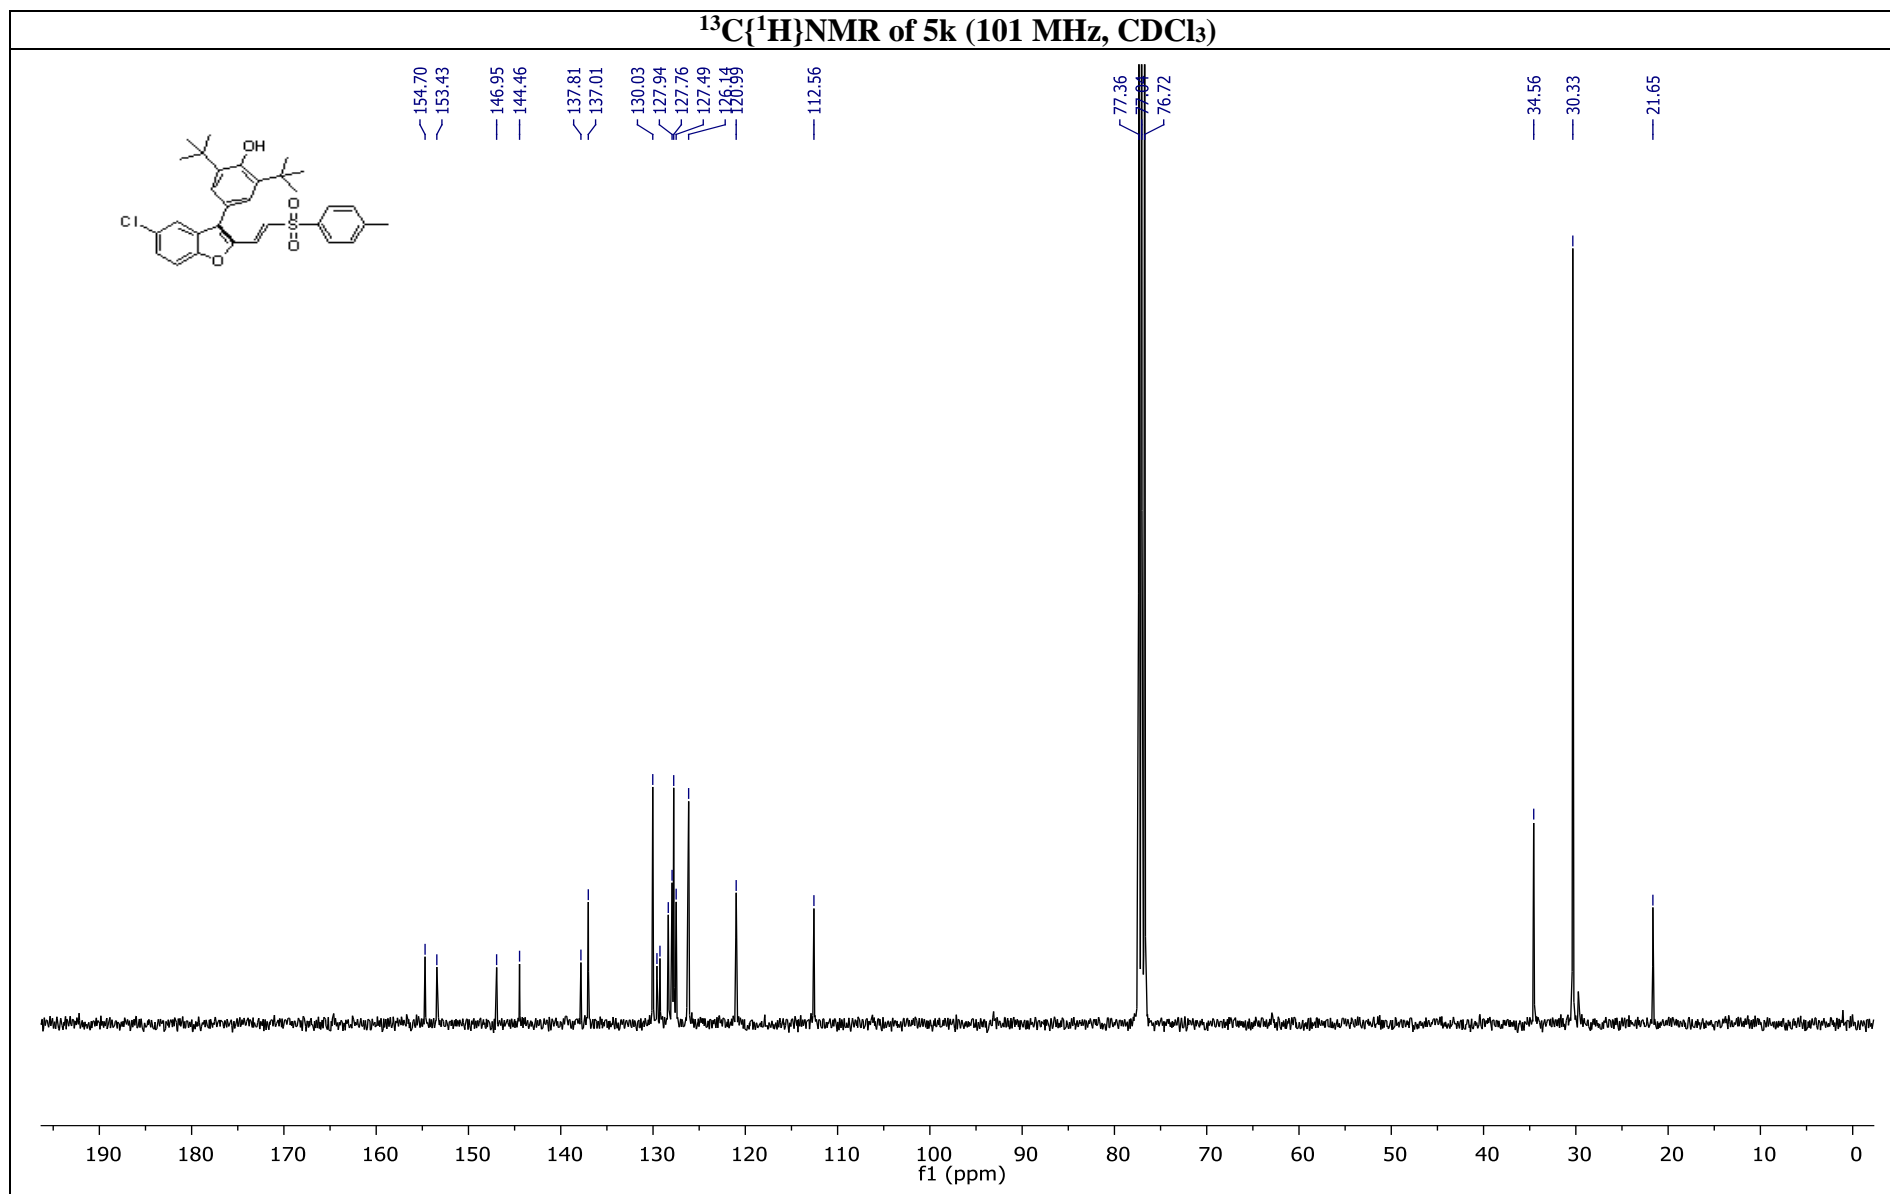

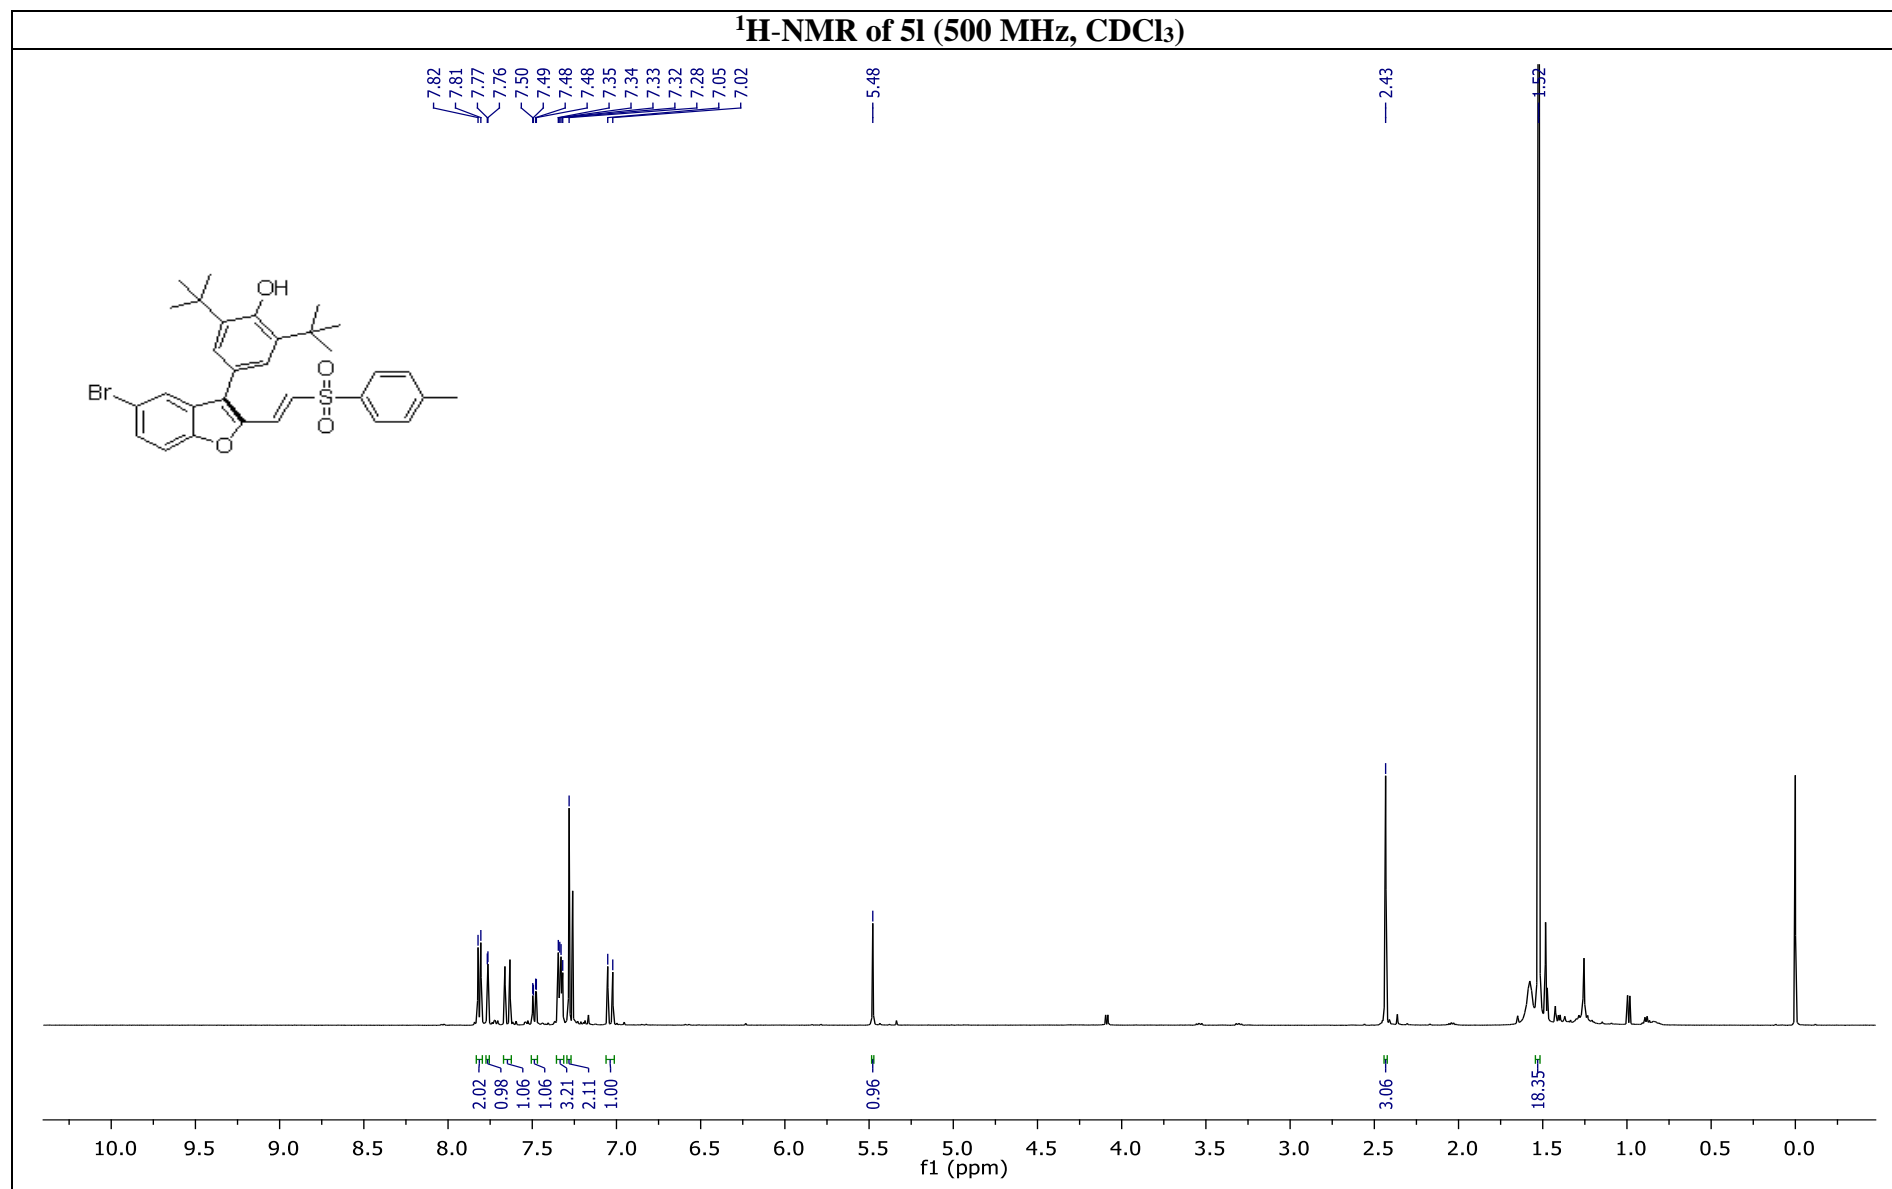

**$^{13}\text{C}\{^1\text{H}\}$ NMR of 5l (101 MHz,  $\text{CDCl}_3$ )**

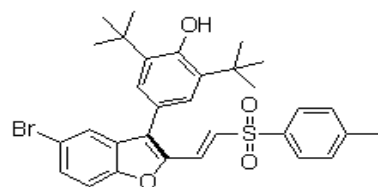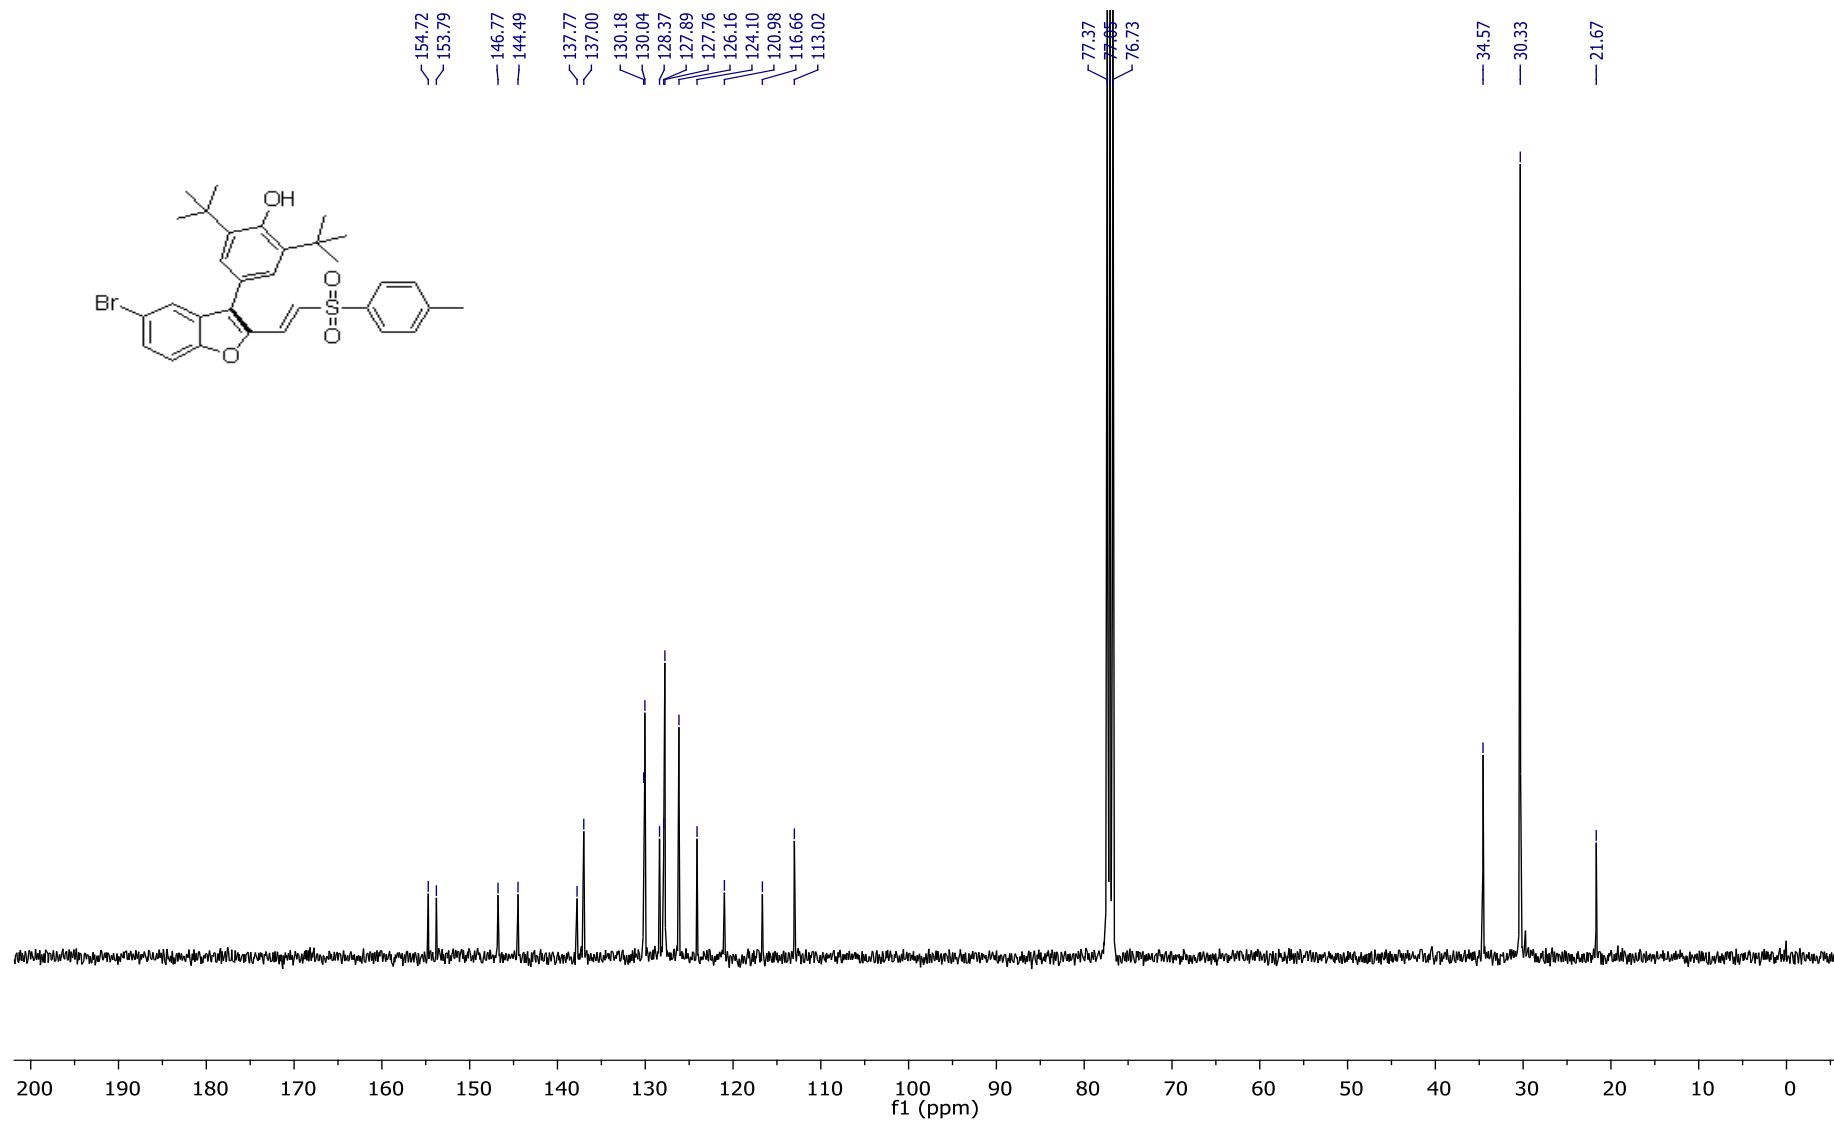

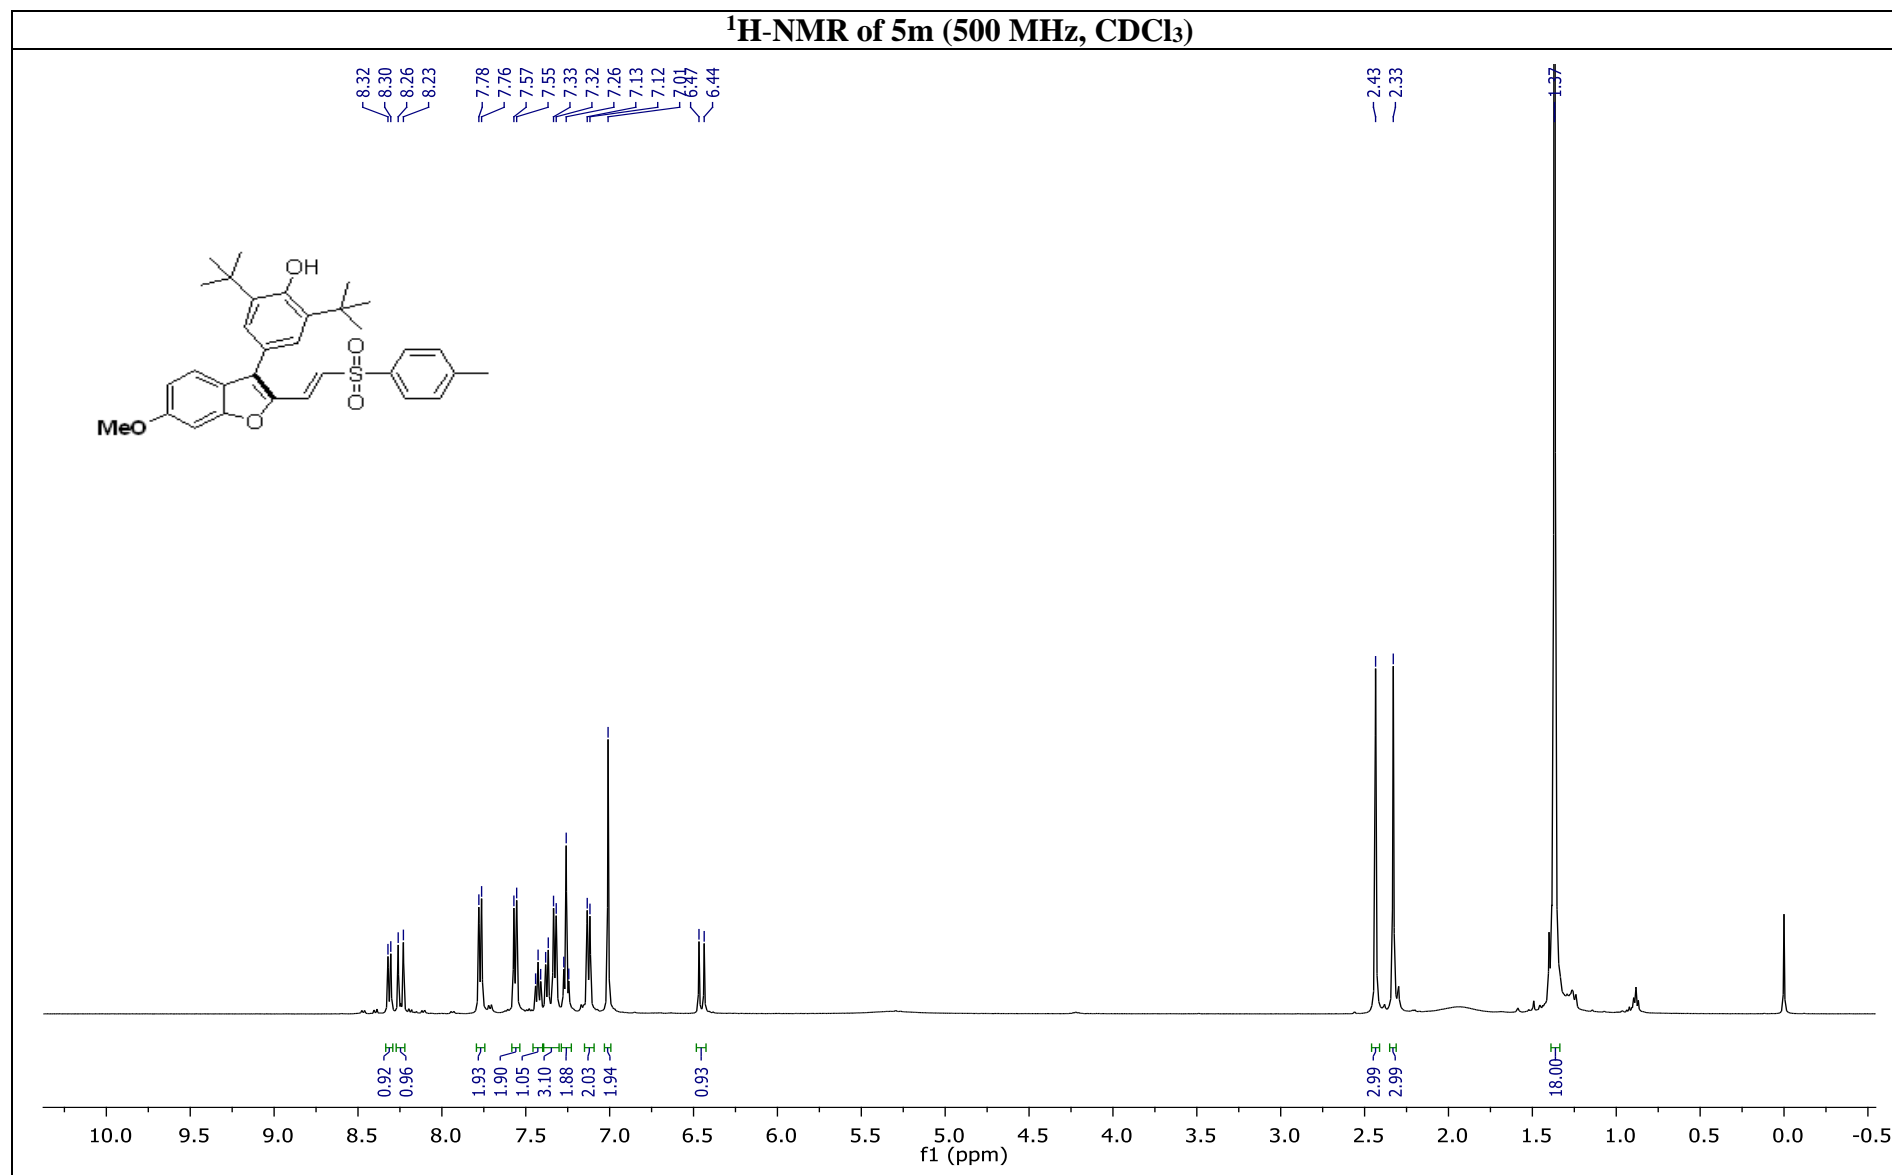

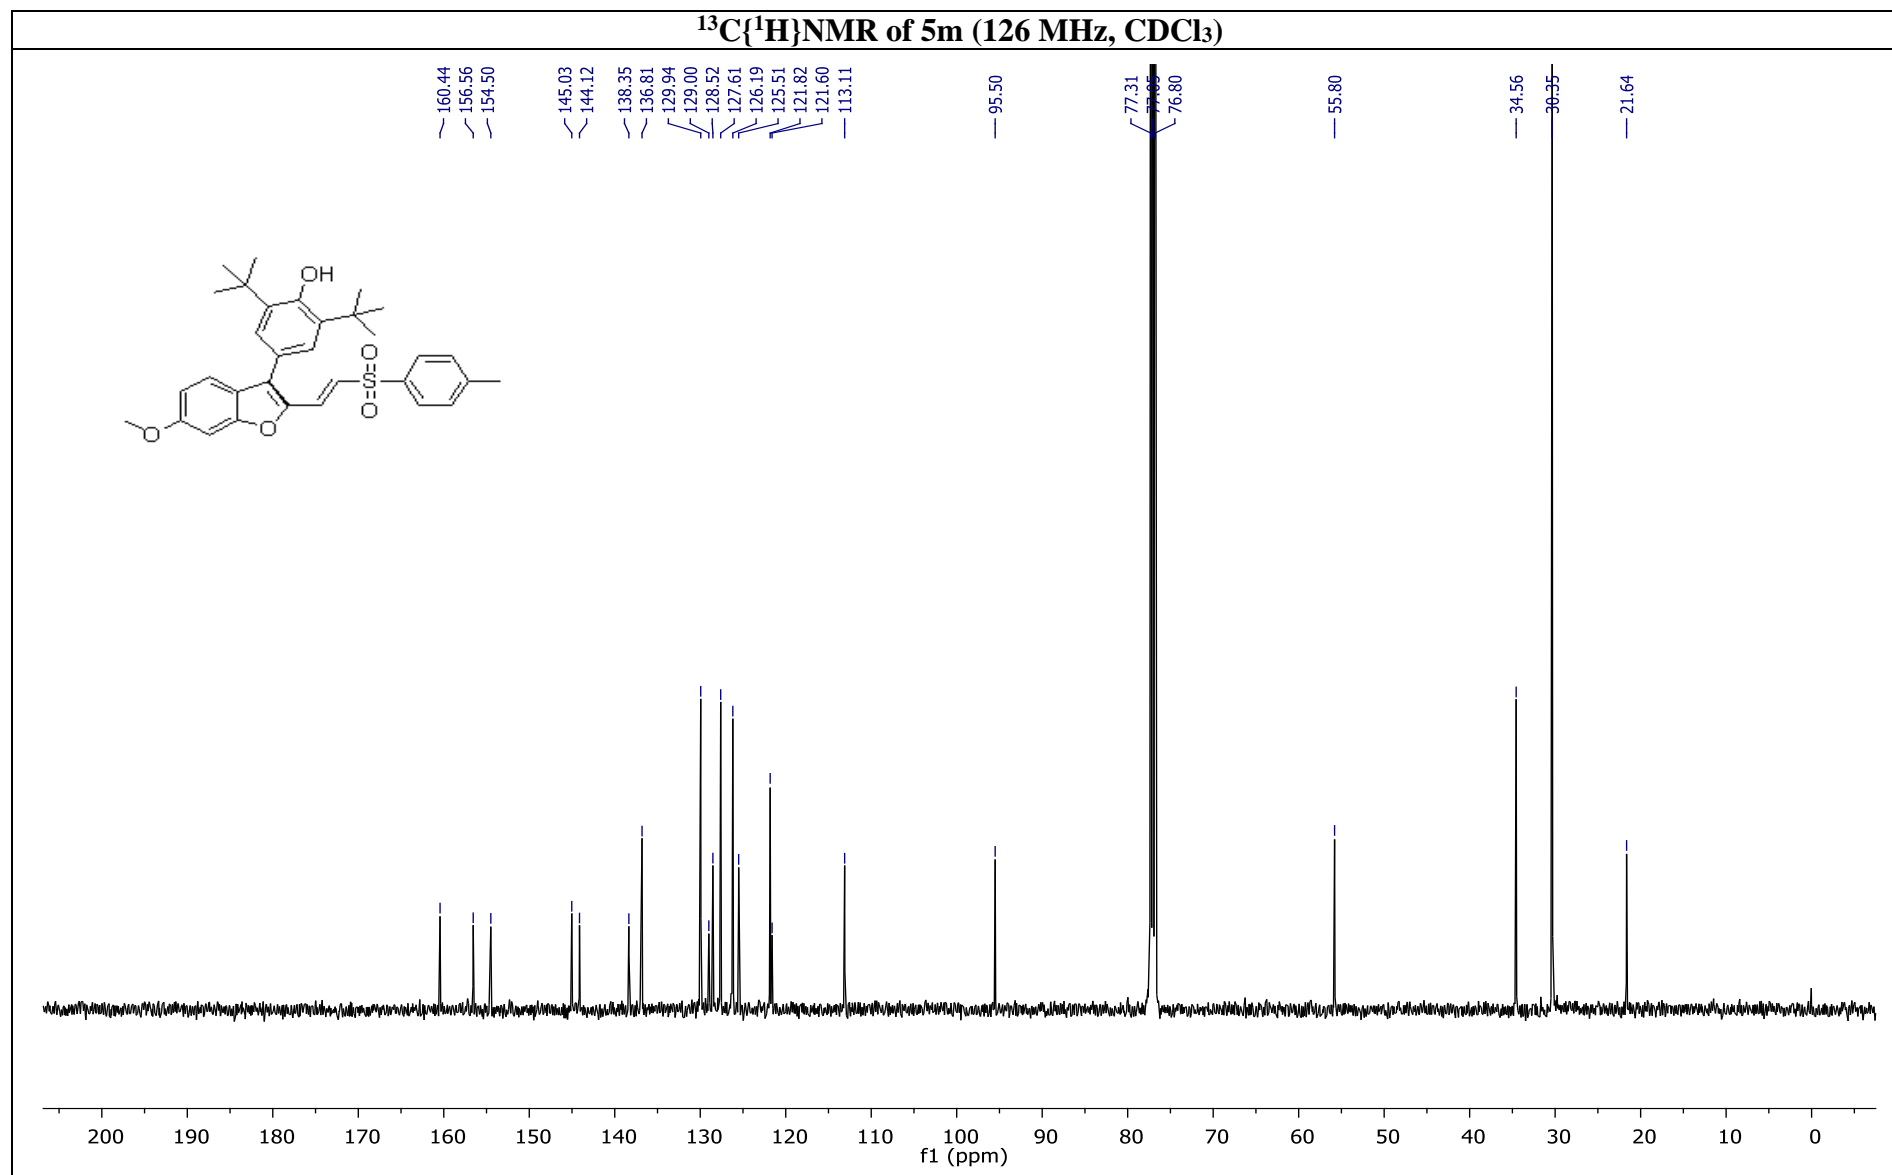

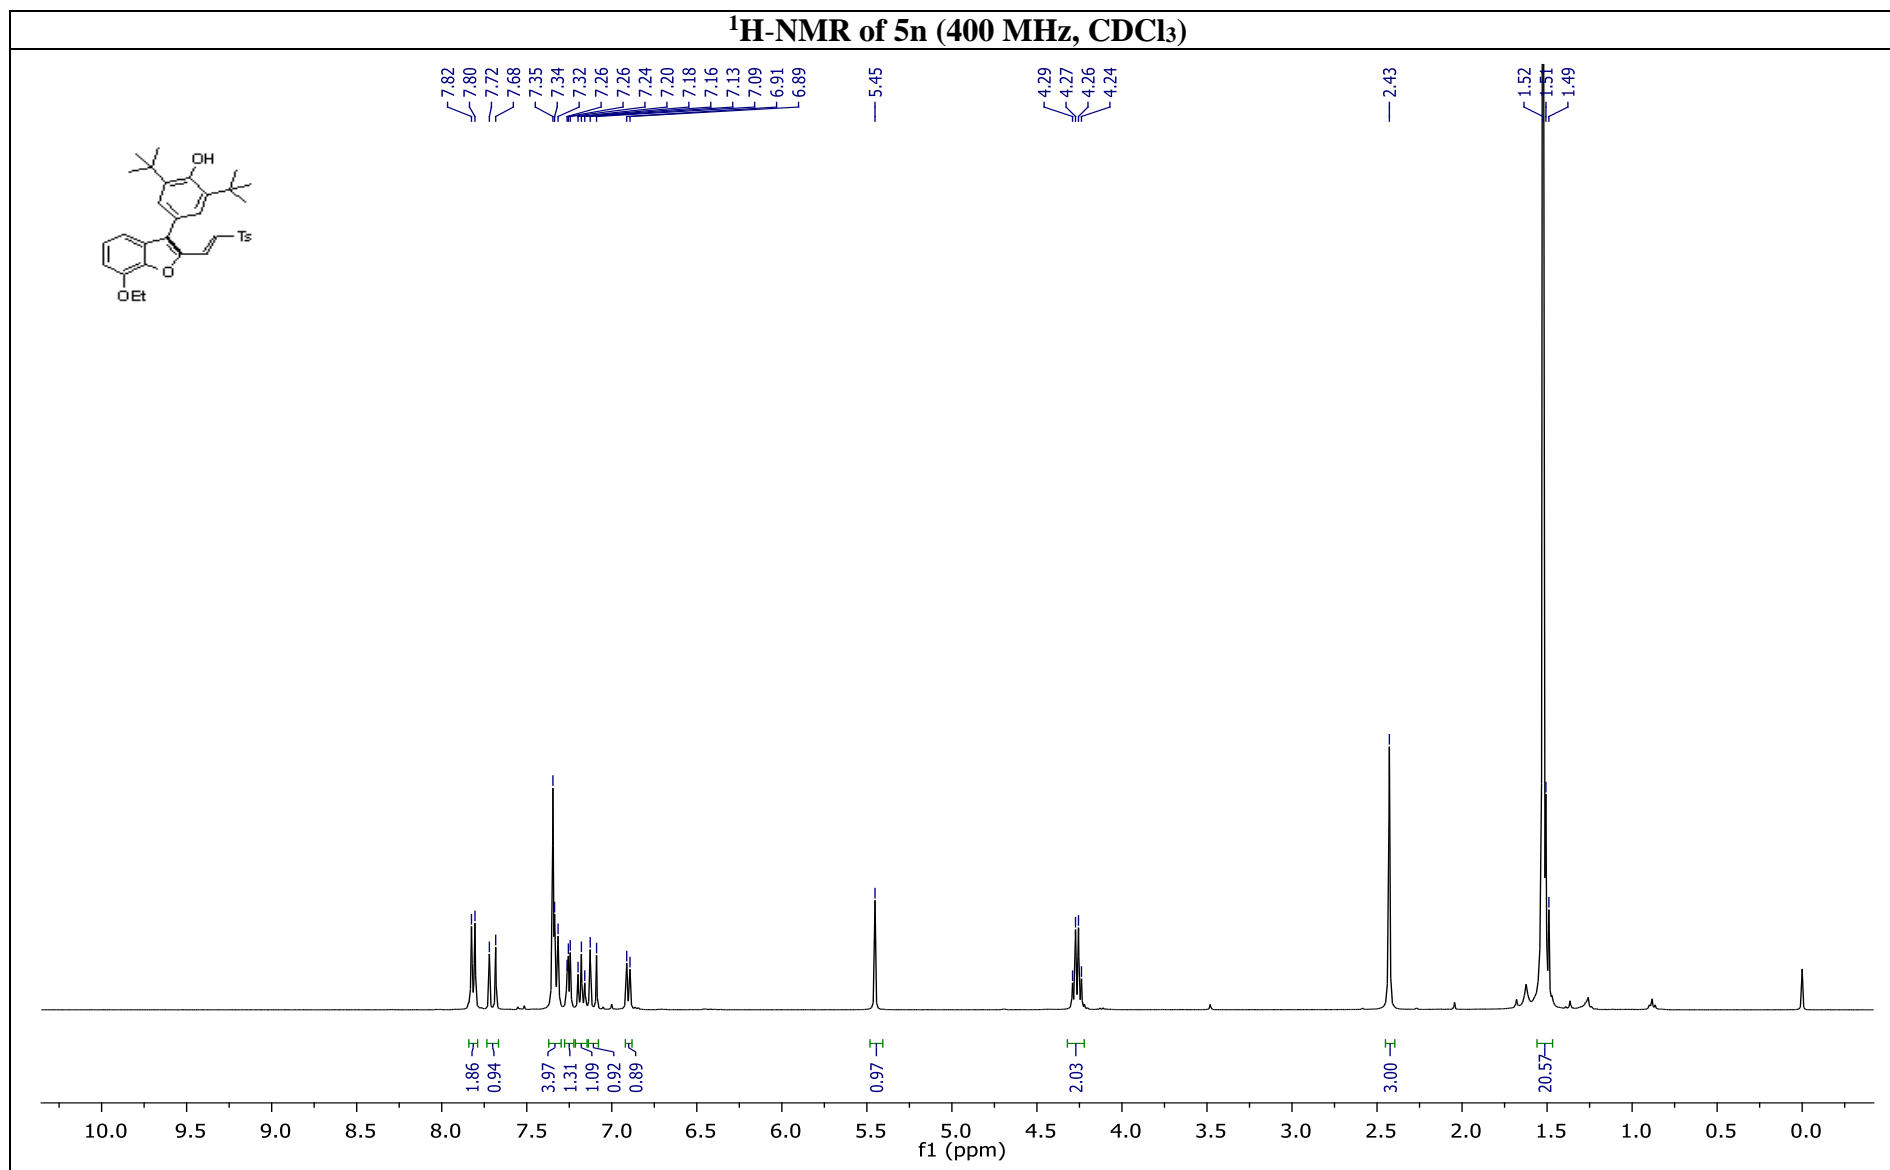

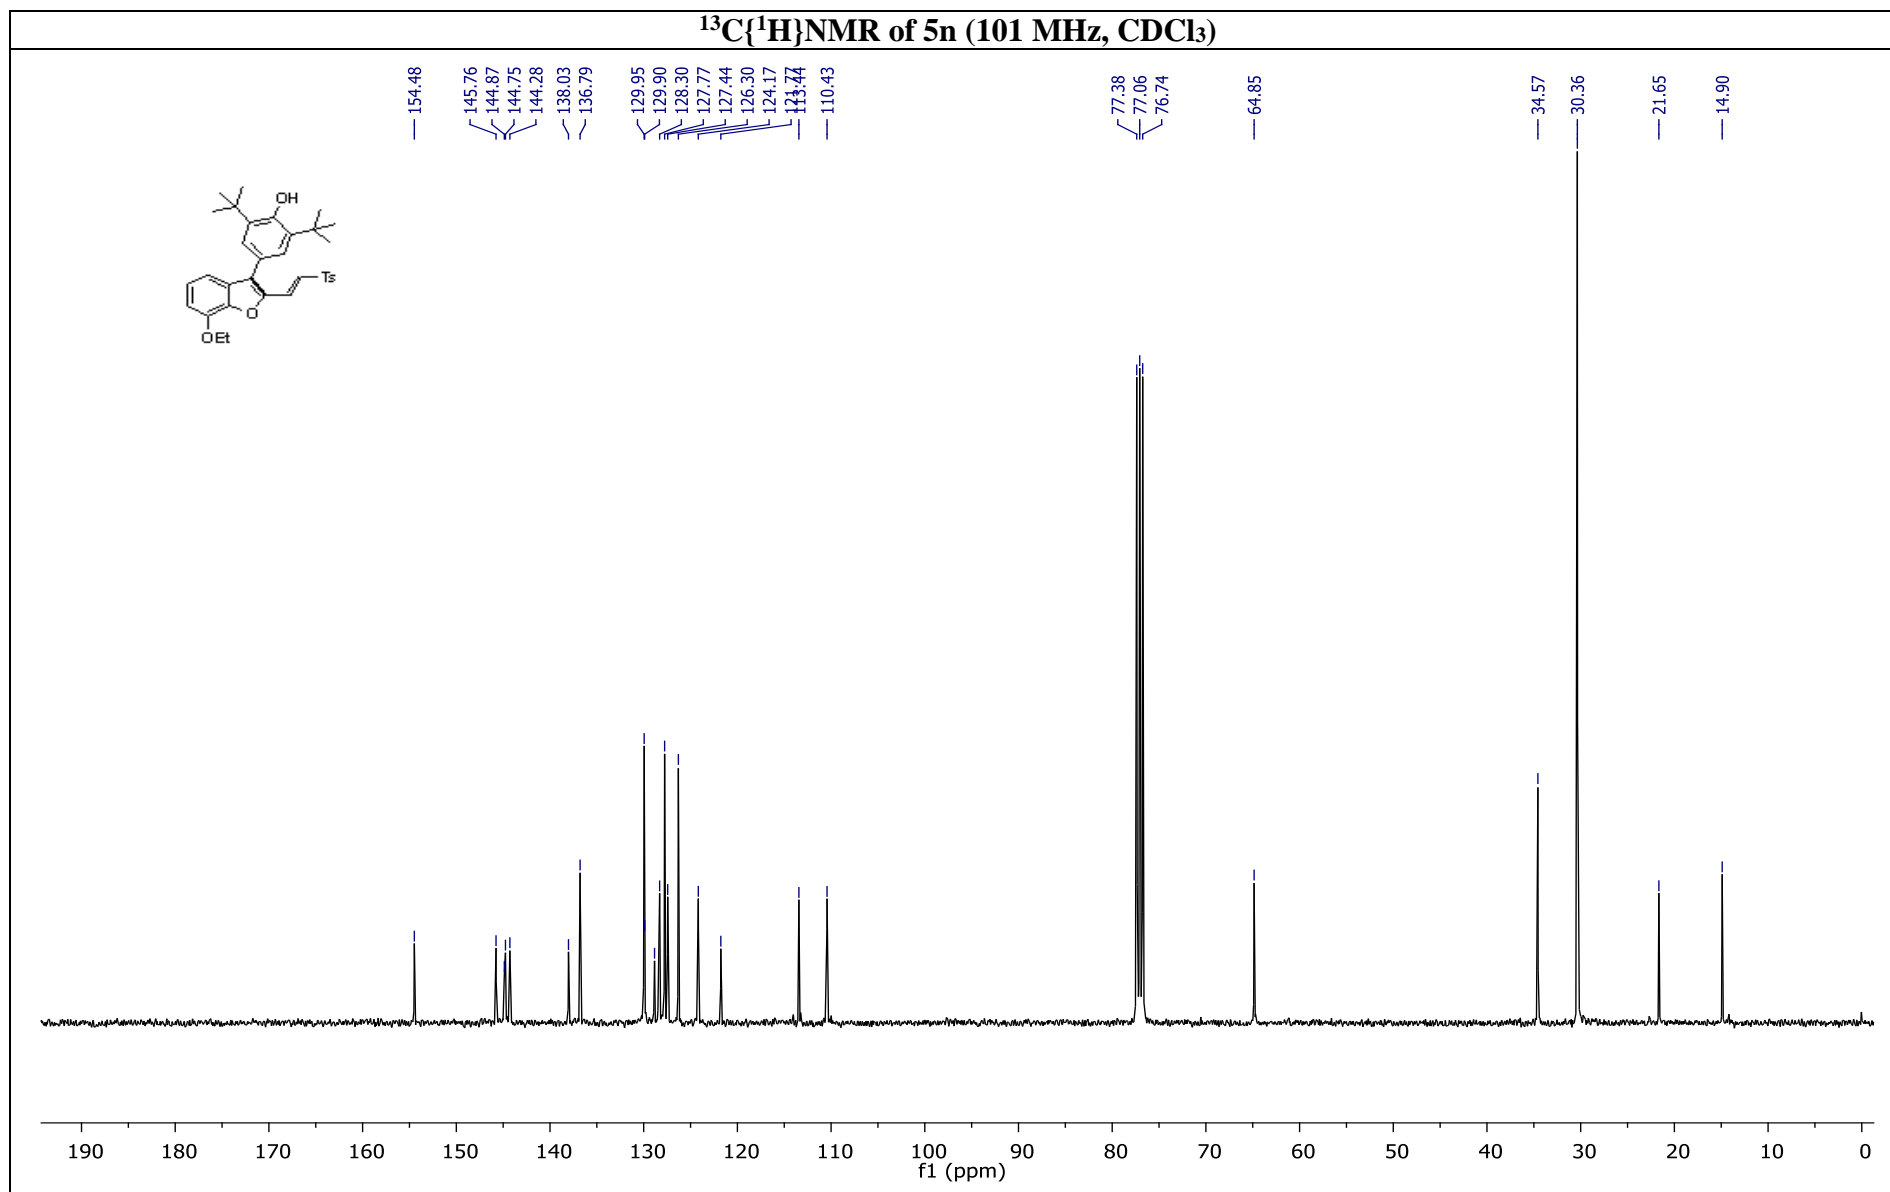

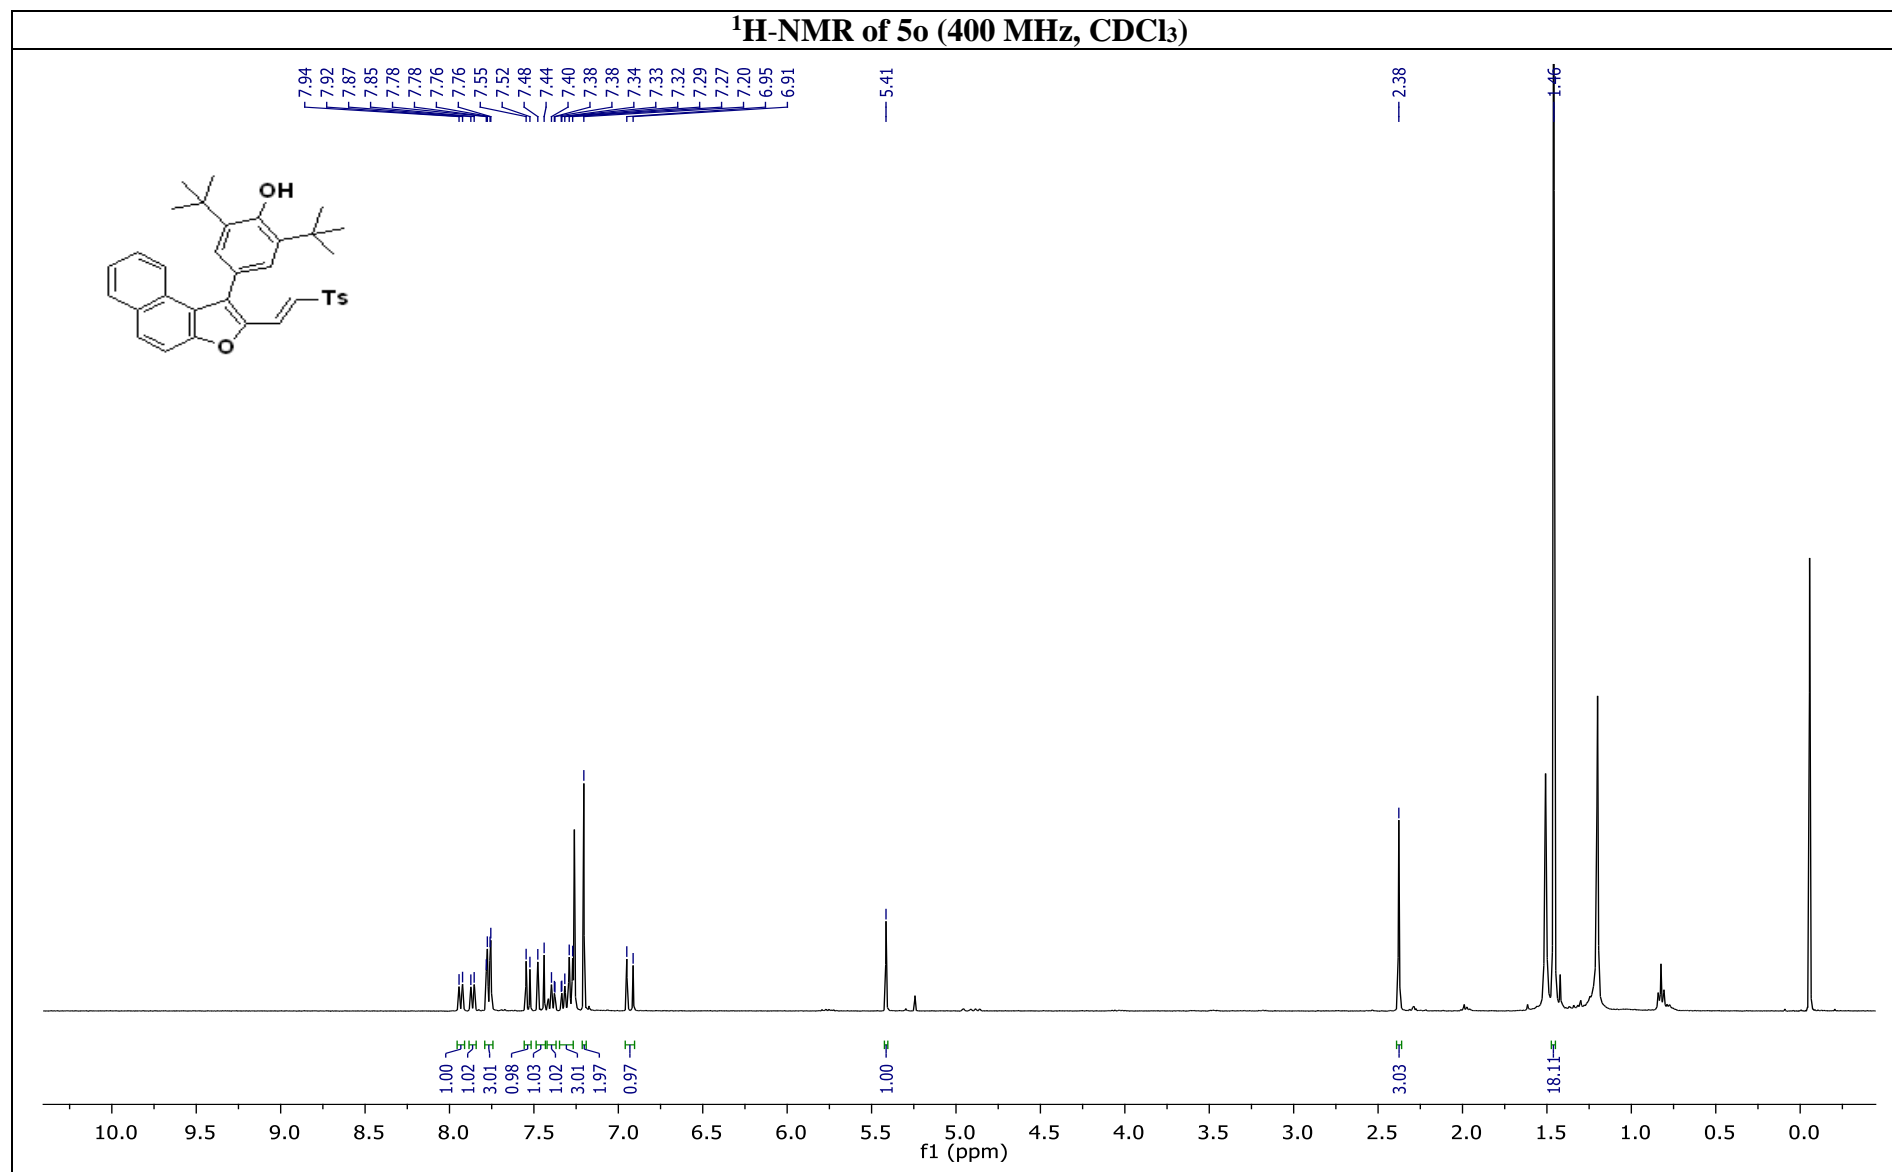

**$^{13}\text{C}\{^1\text{H}\}$ NMR of 5o (101 MHz,  $\text{CDCl}_3$ )**

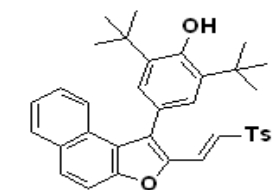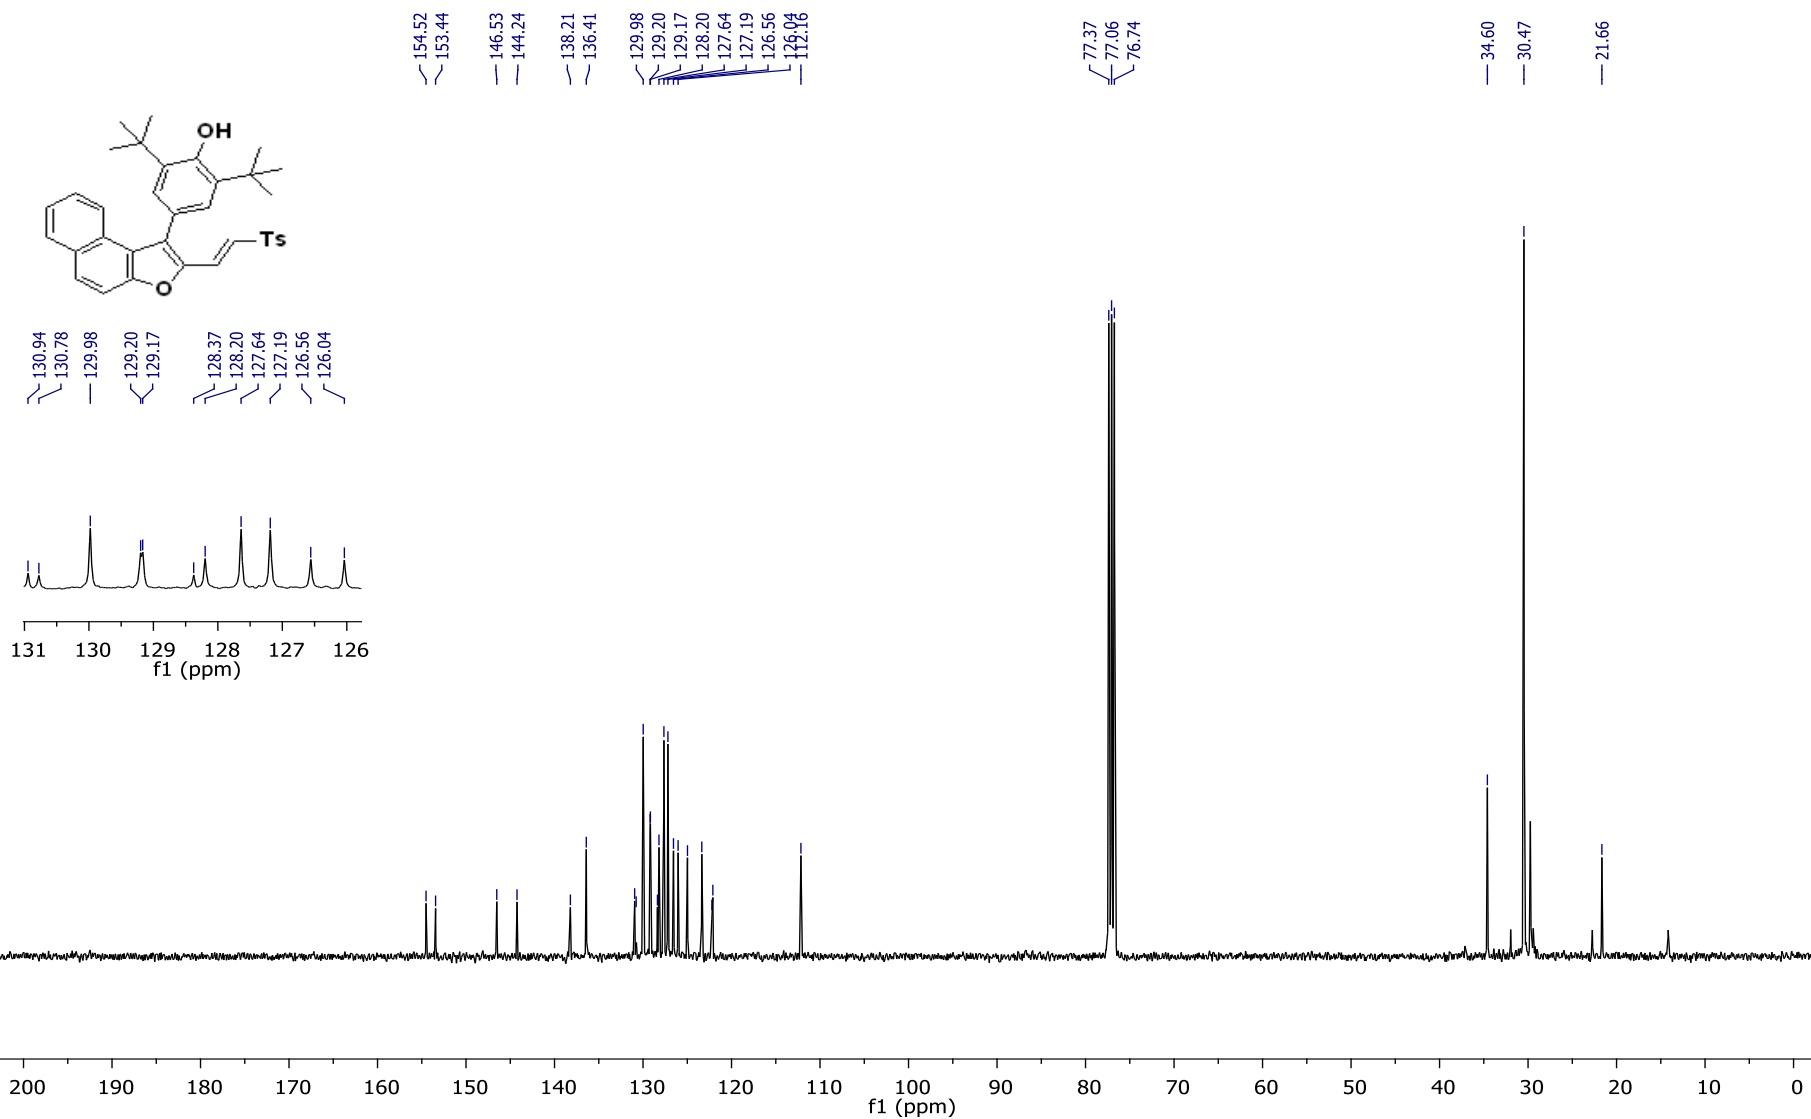

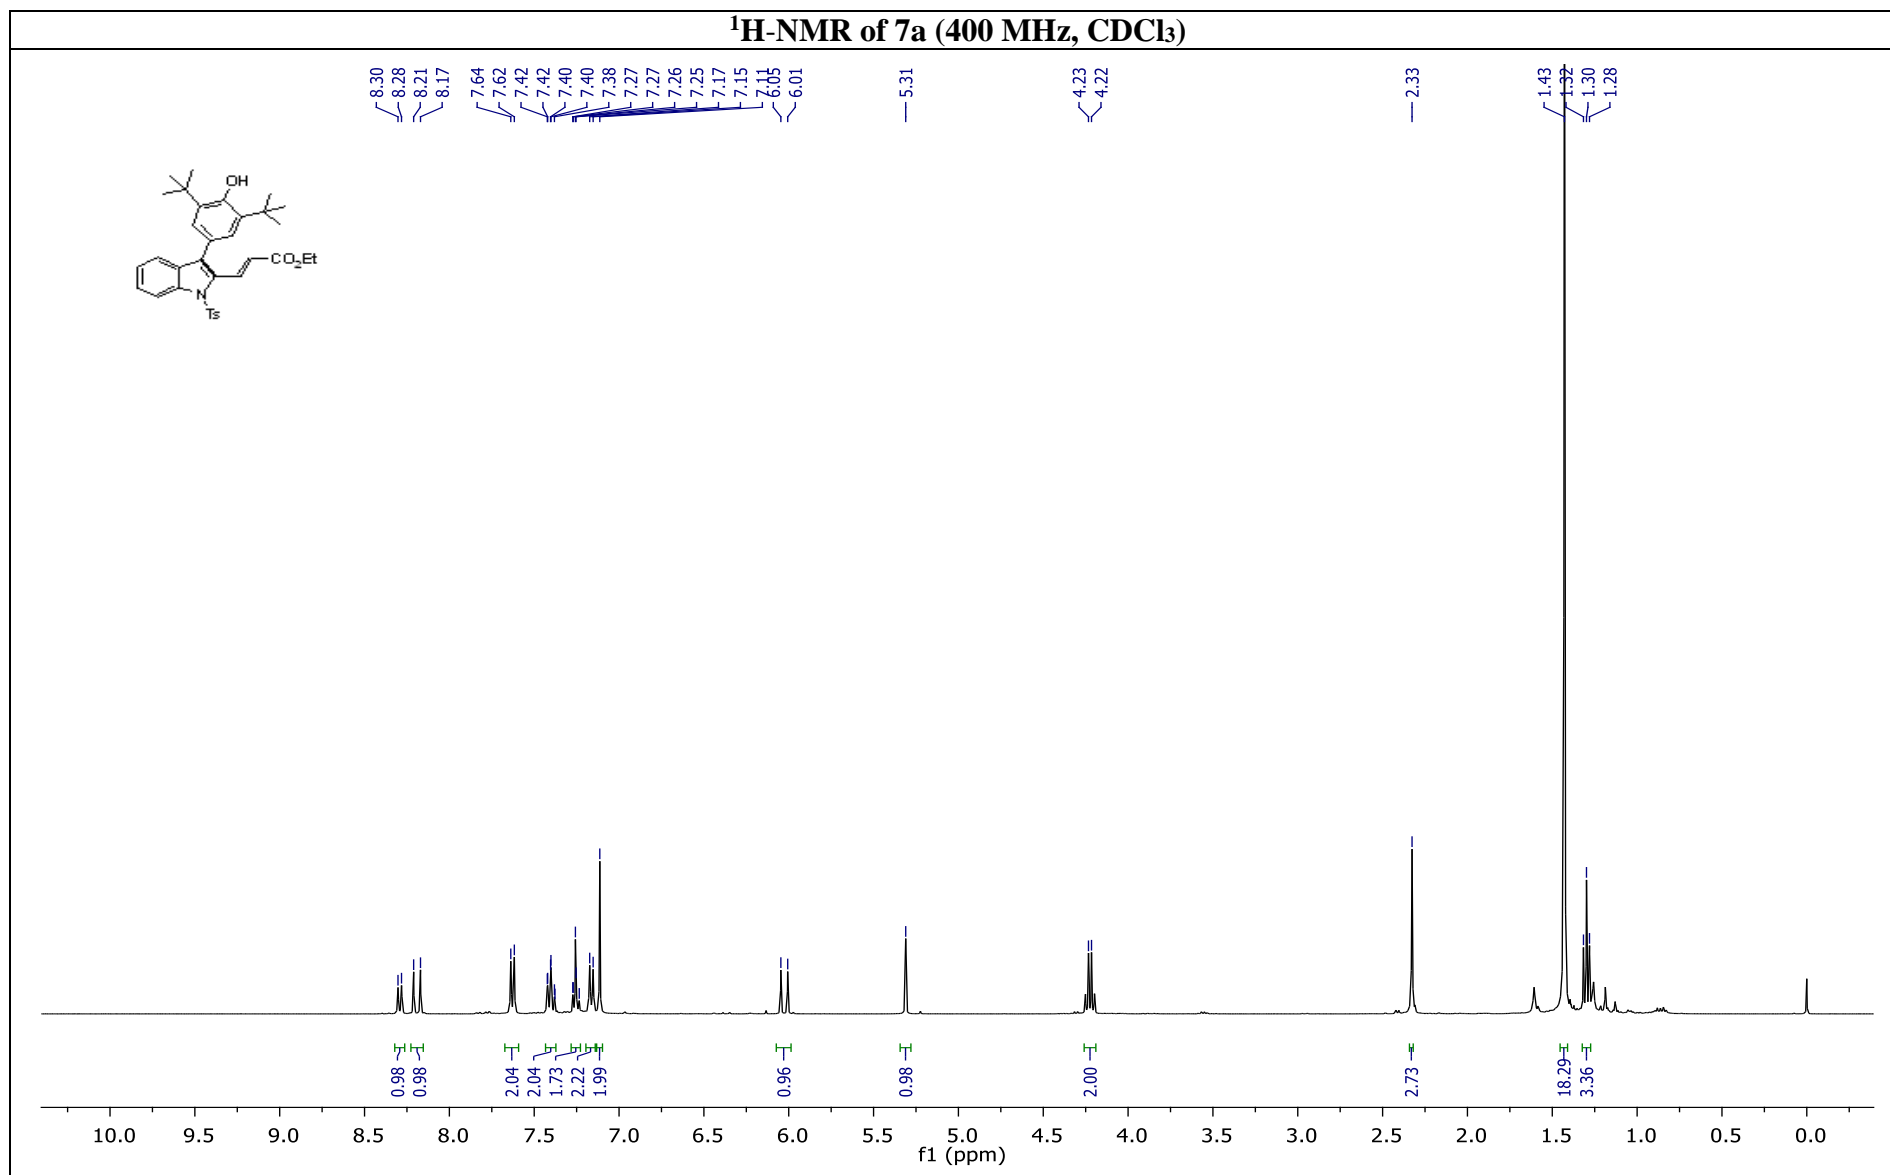

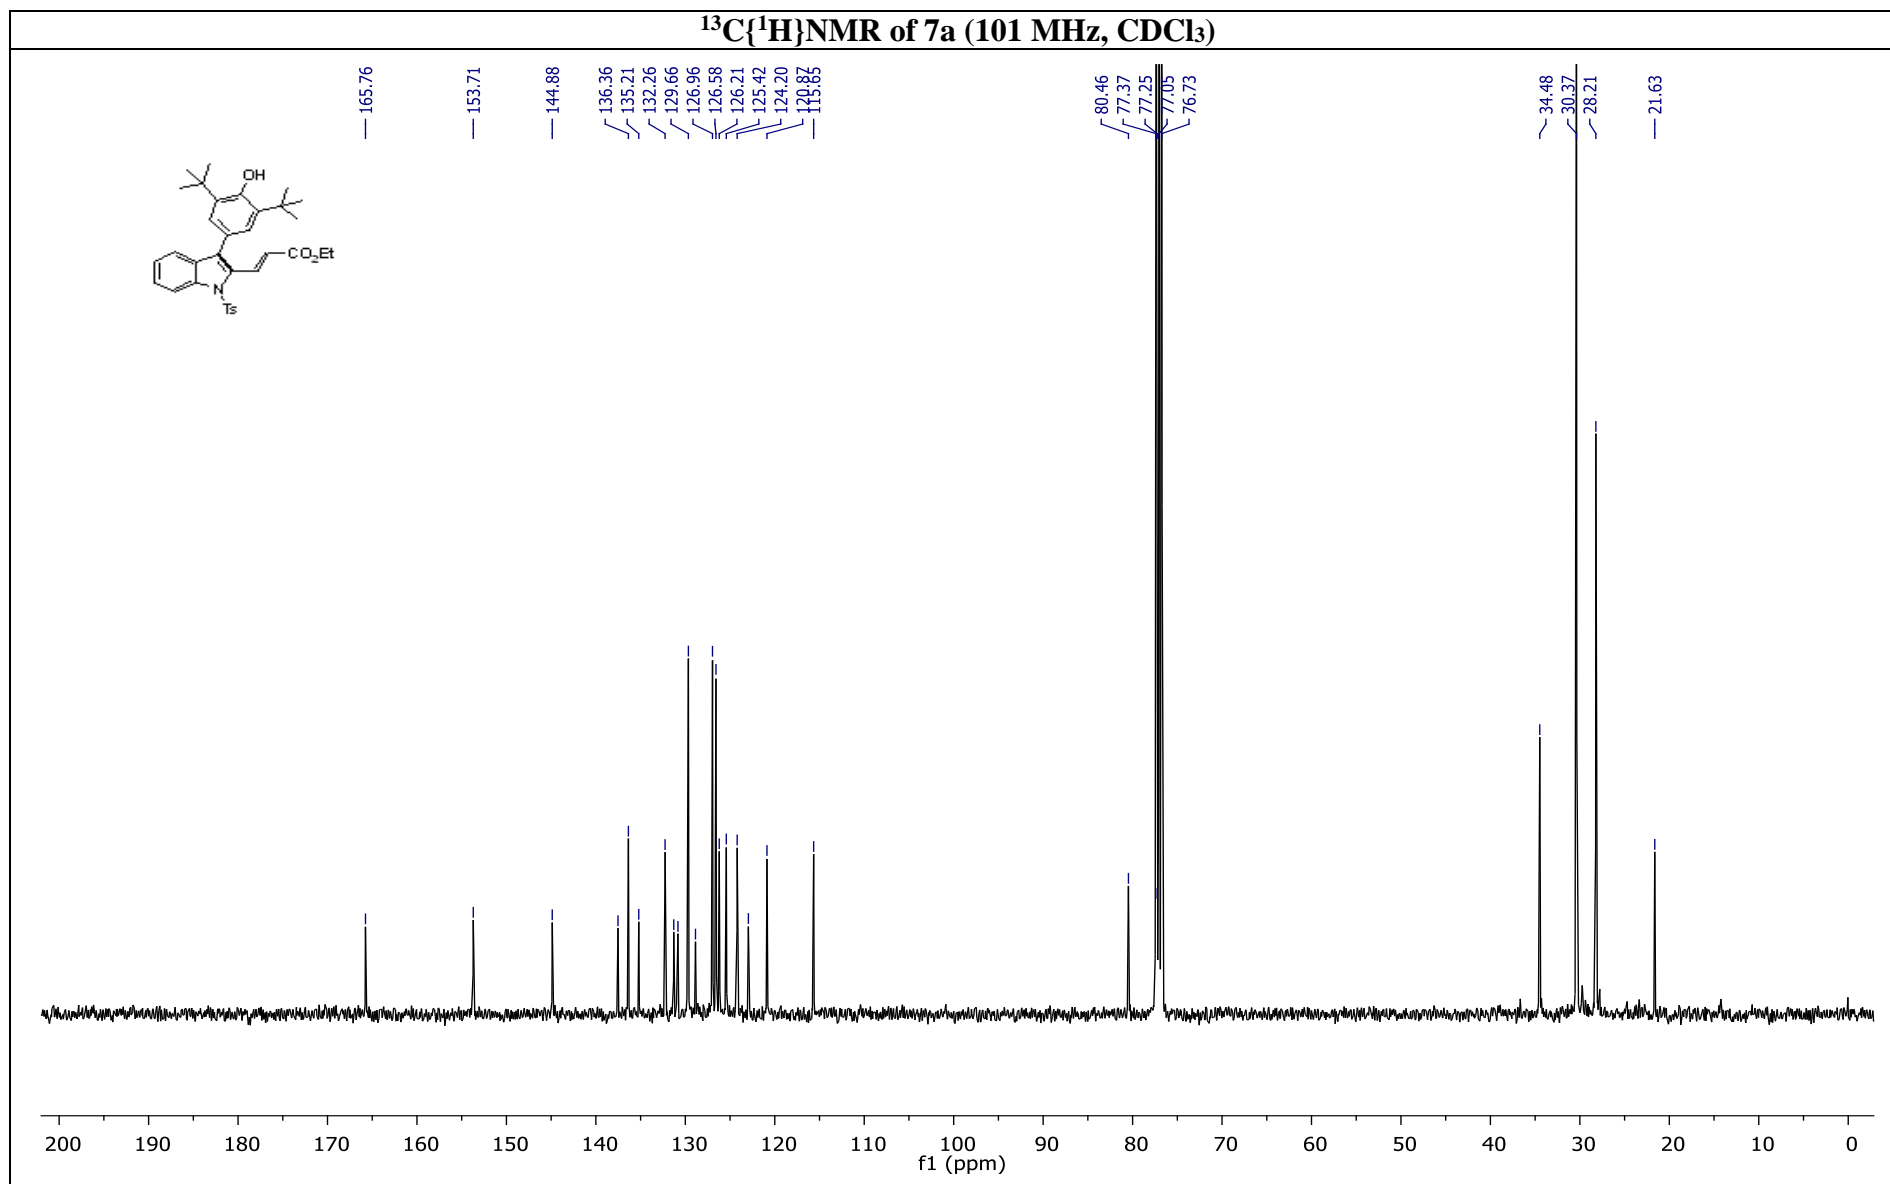

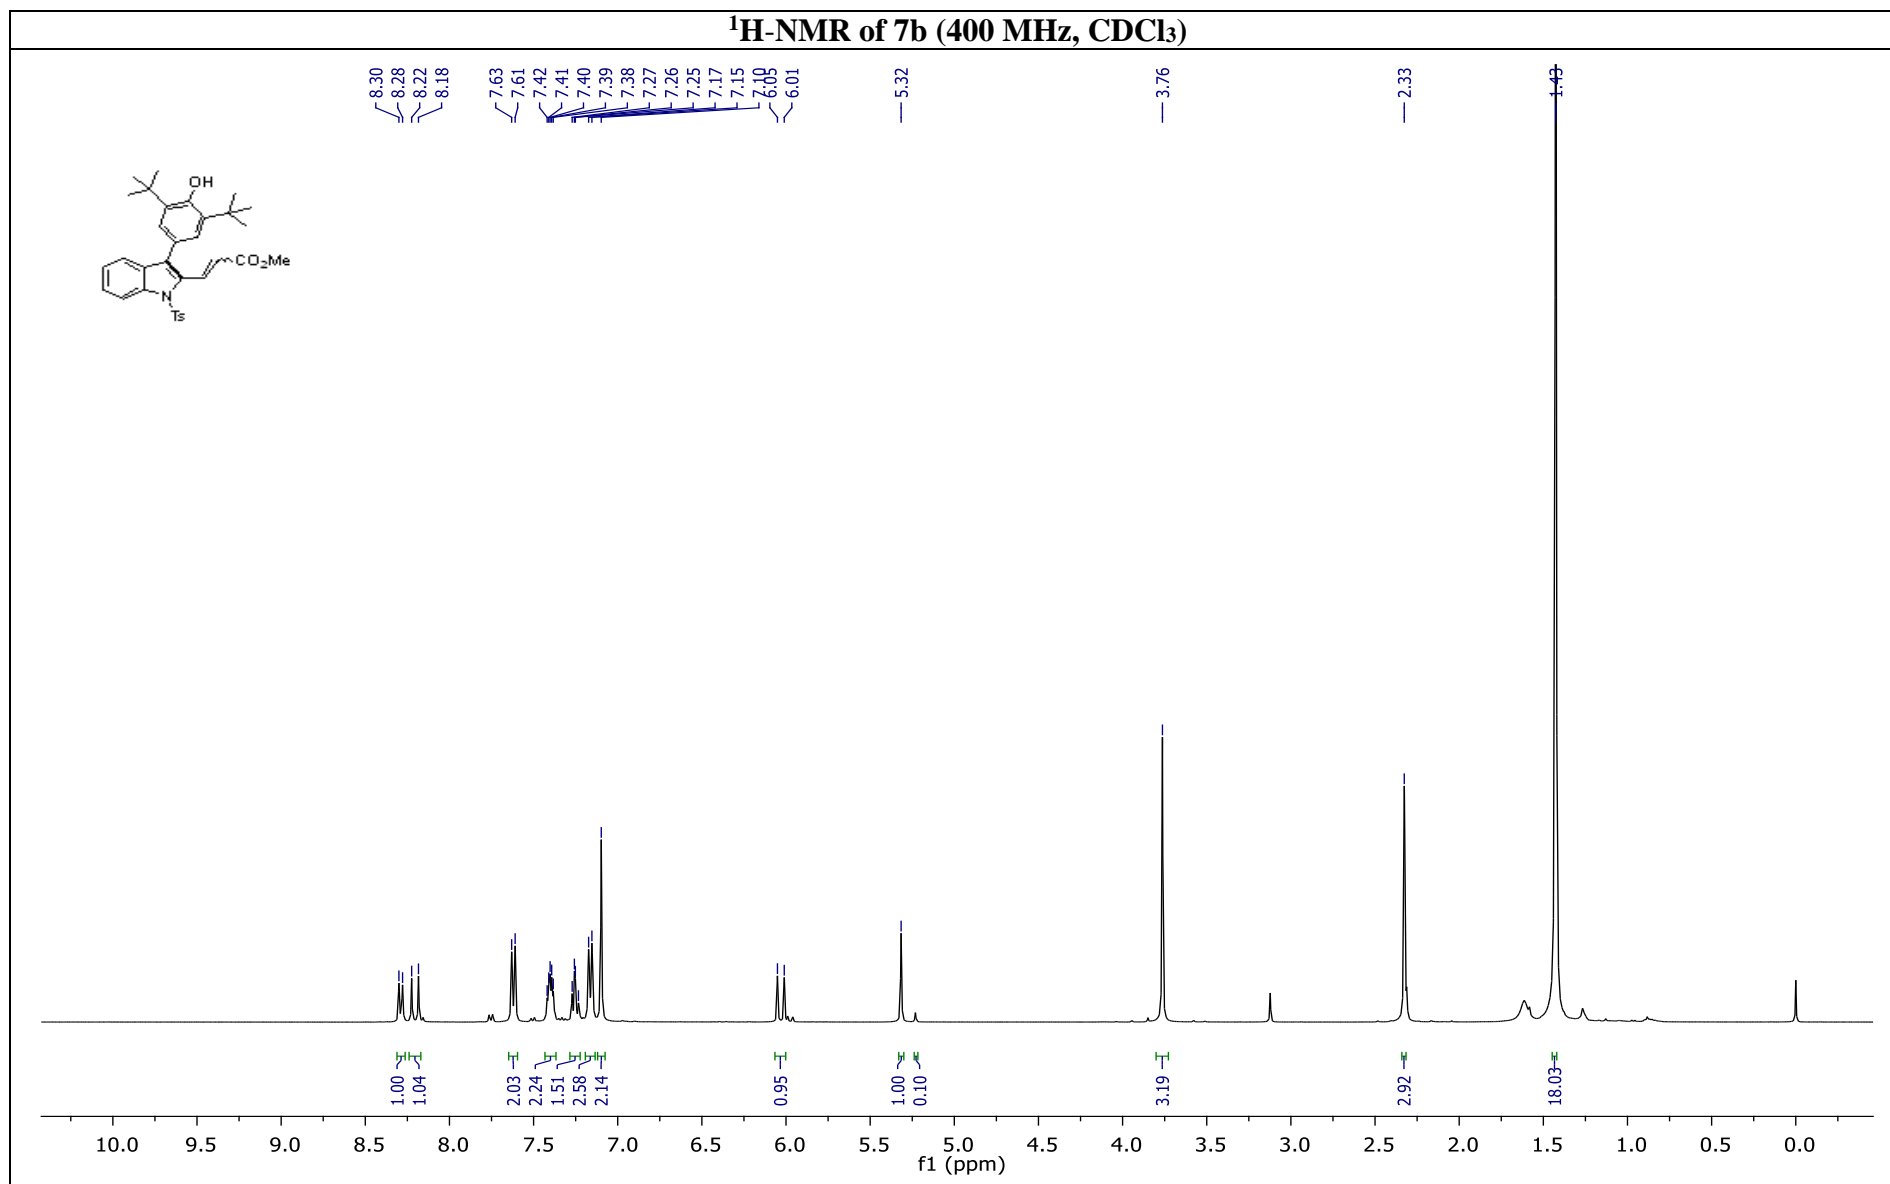

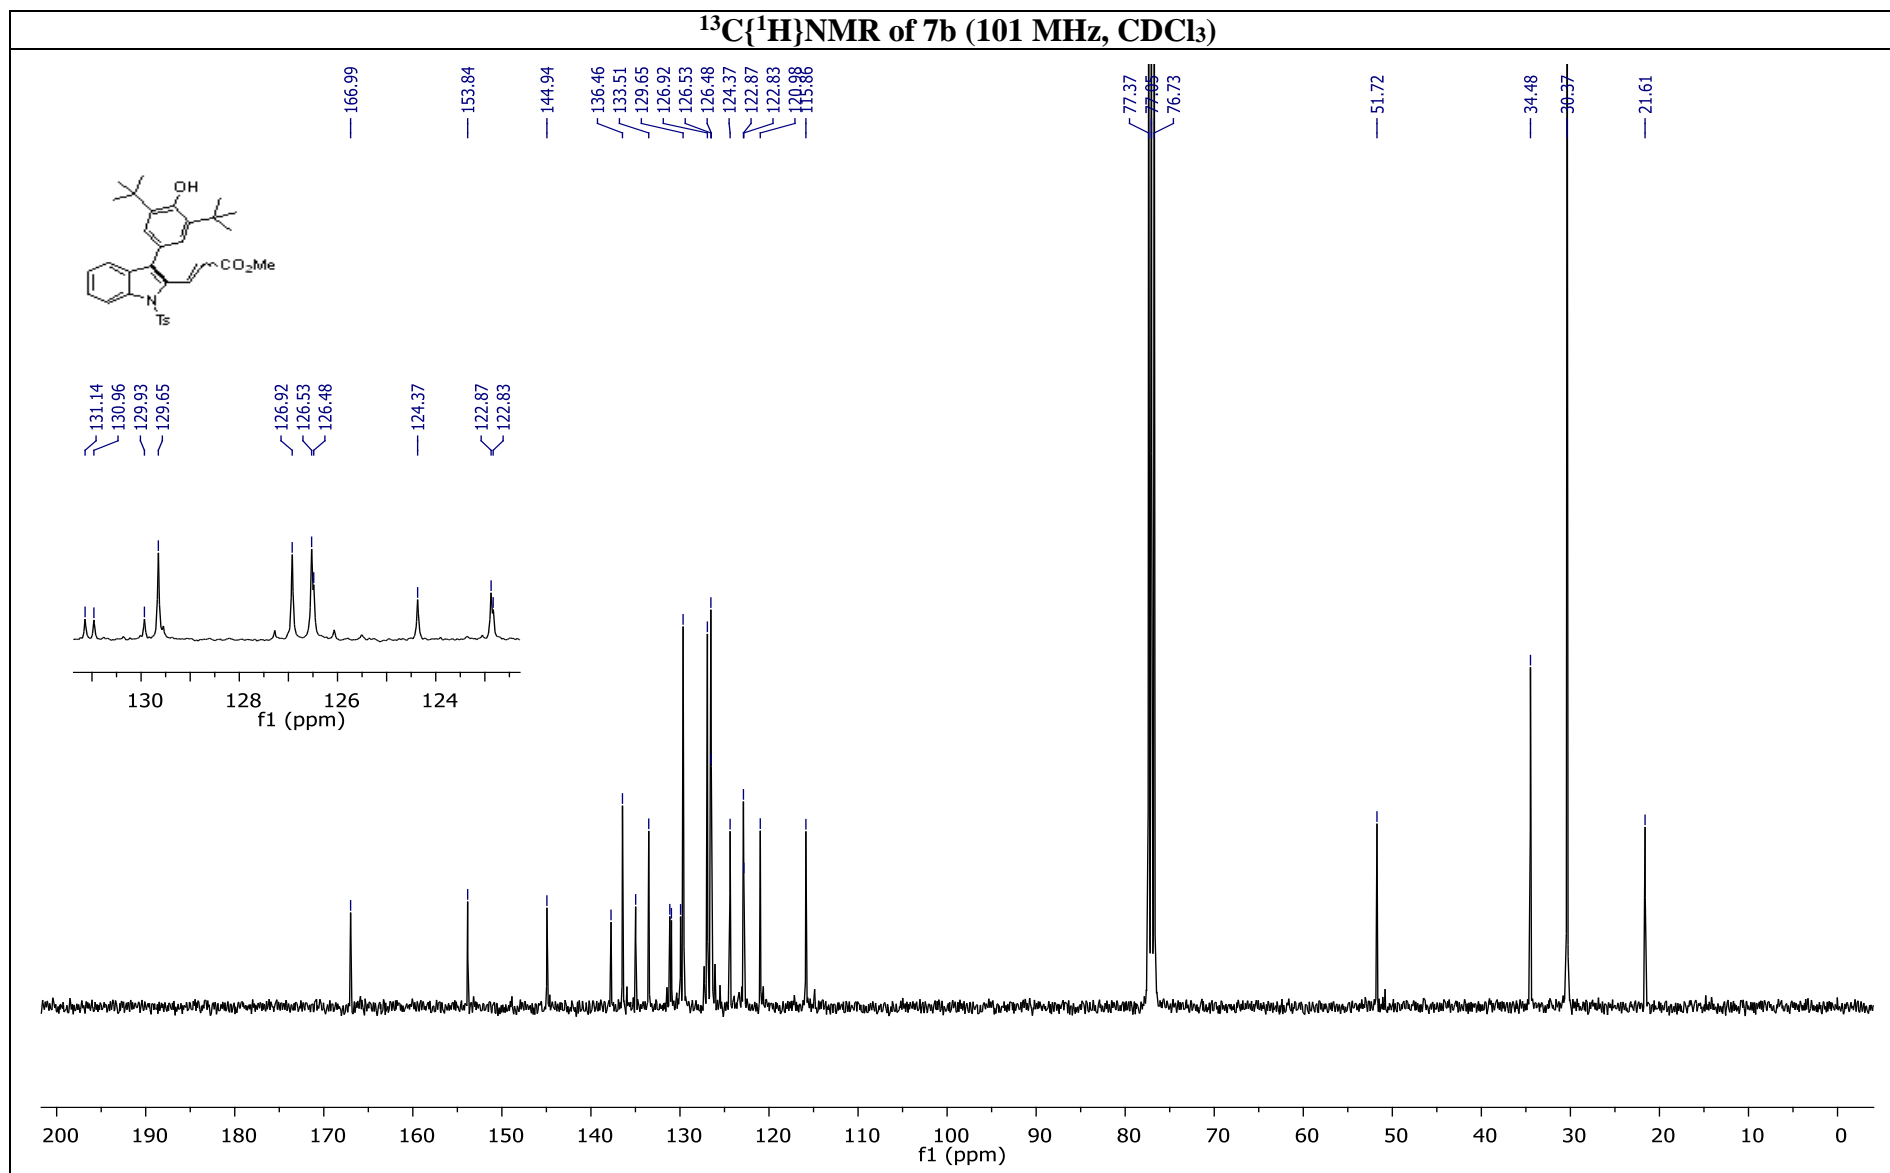

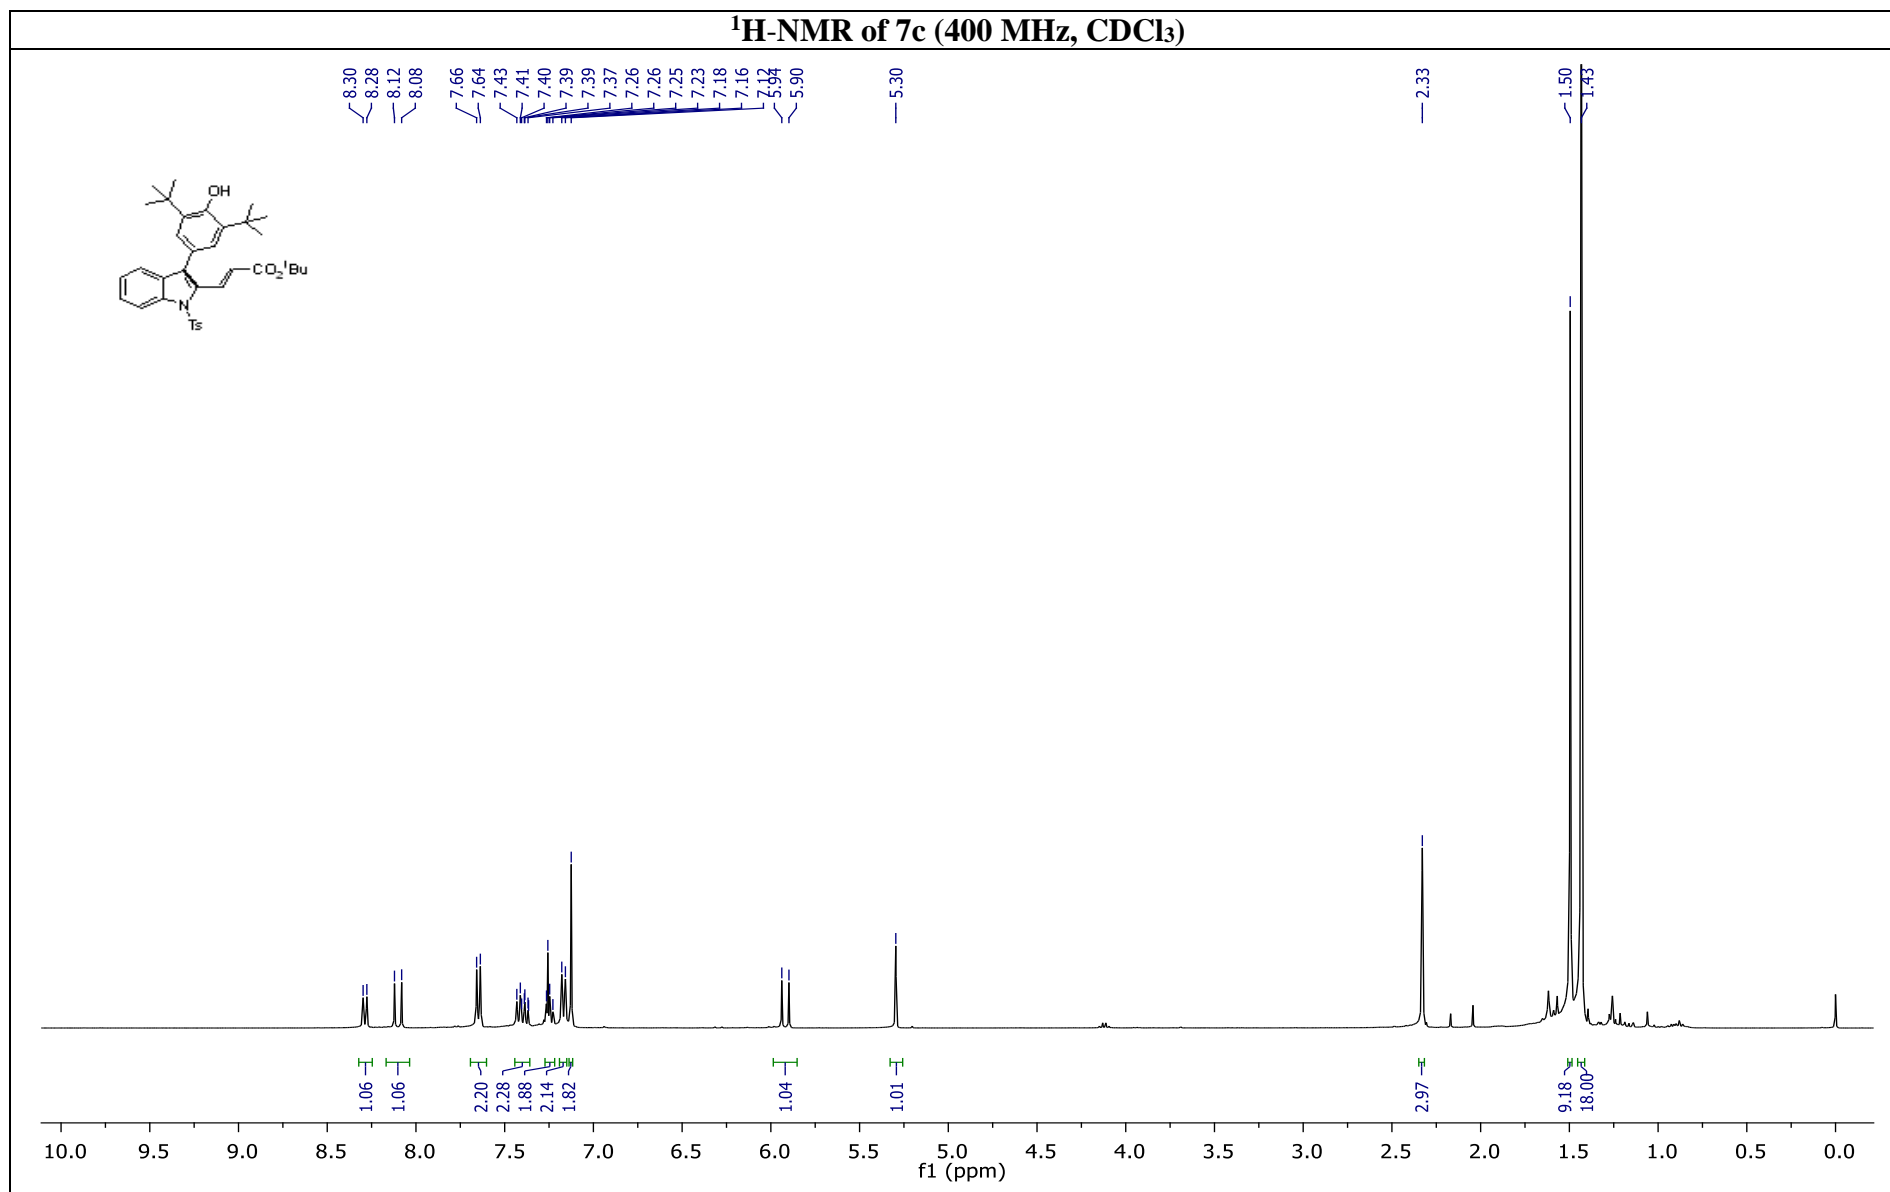

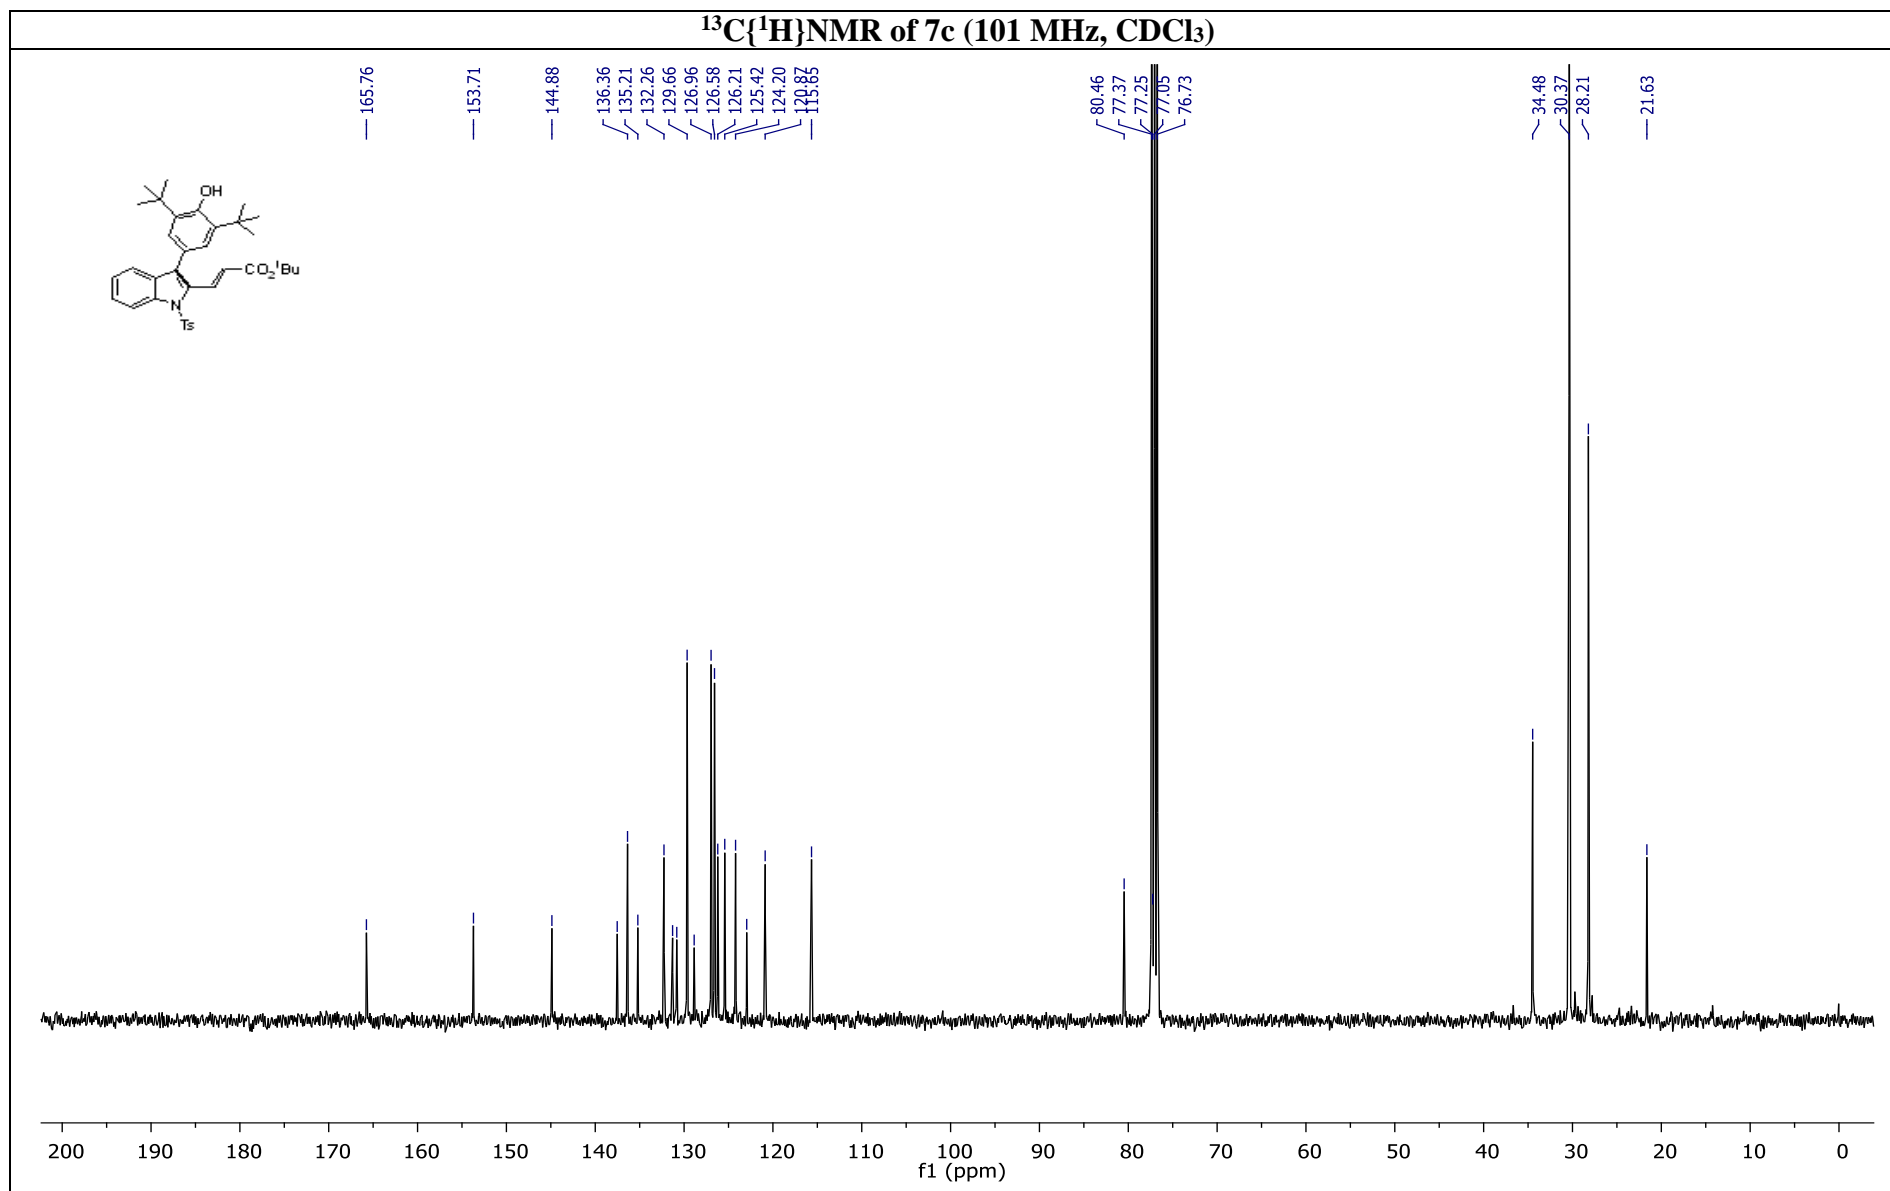

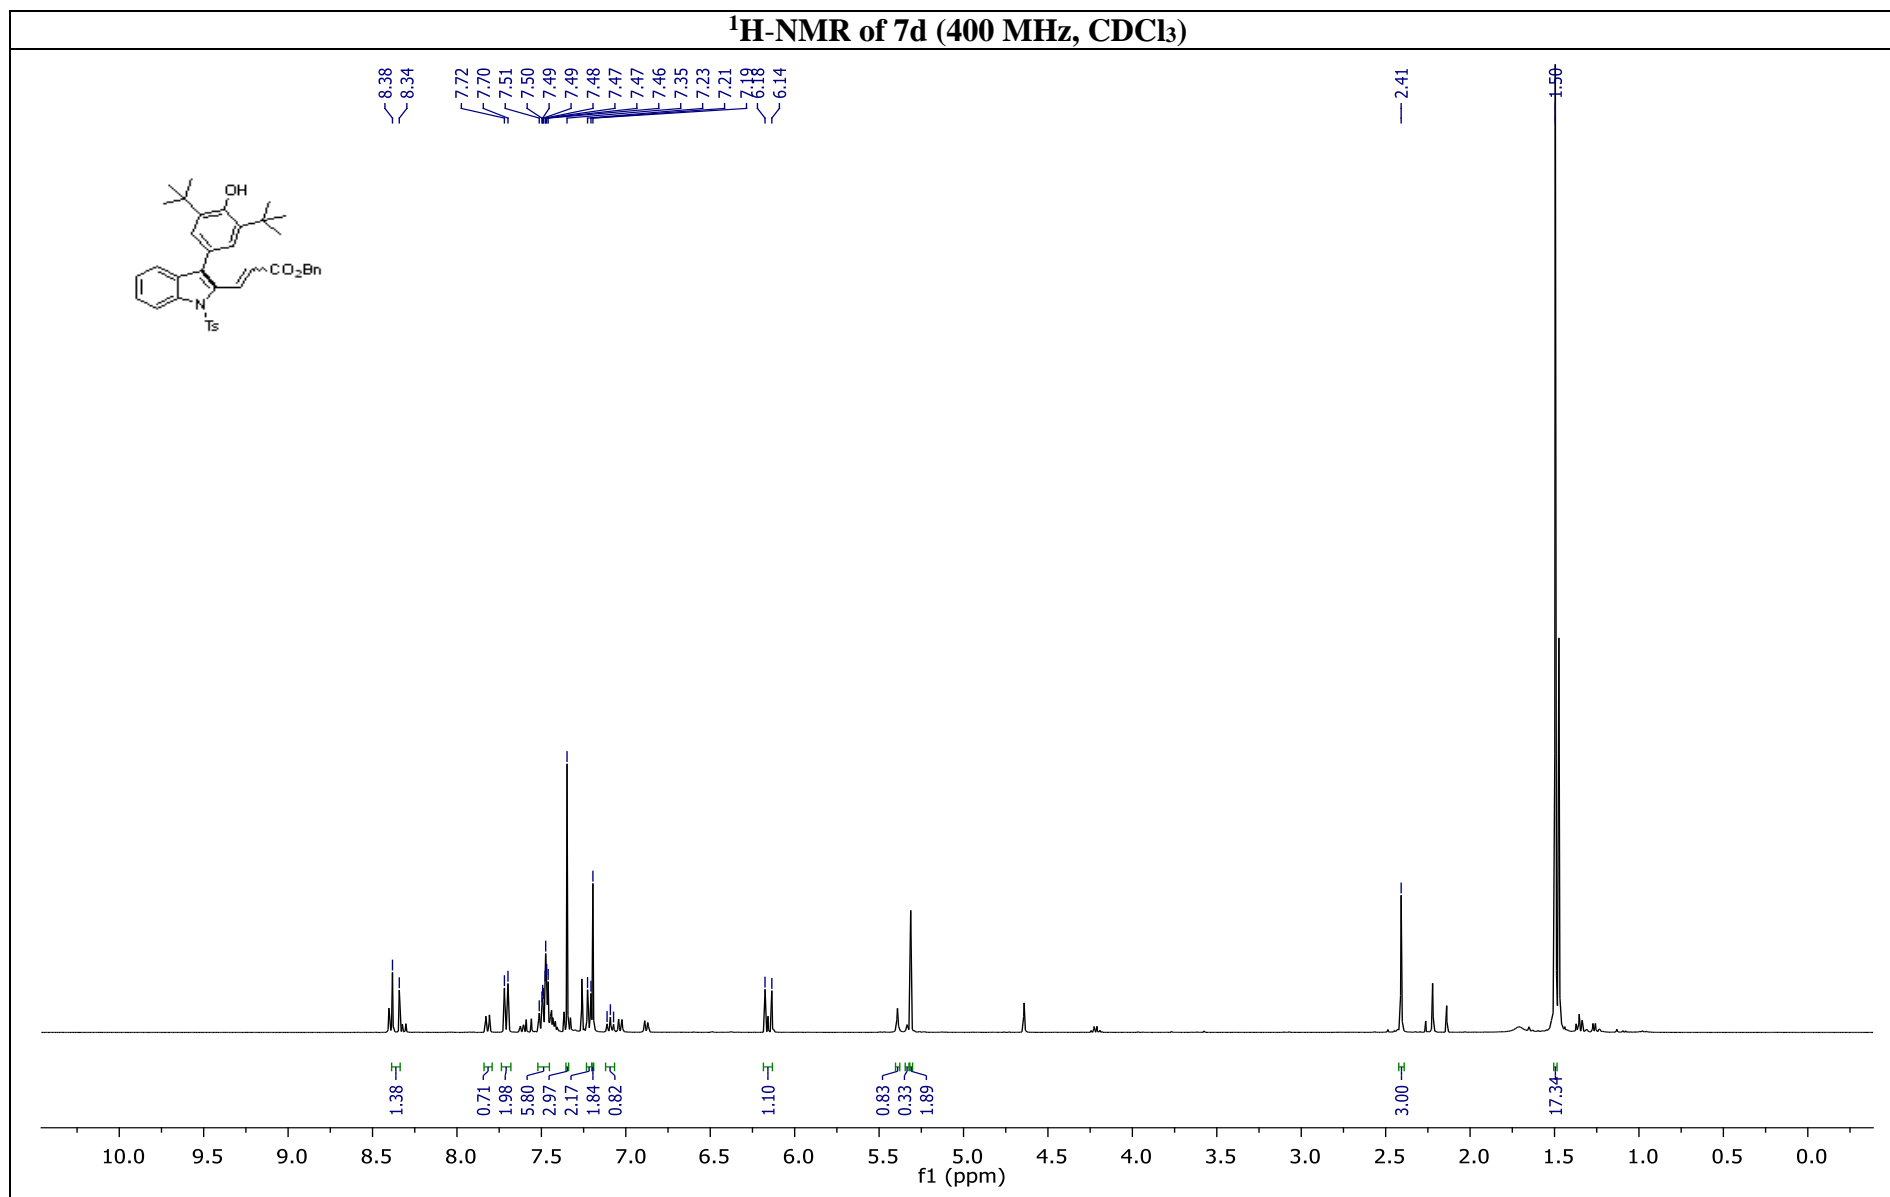

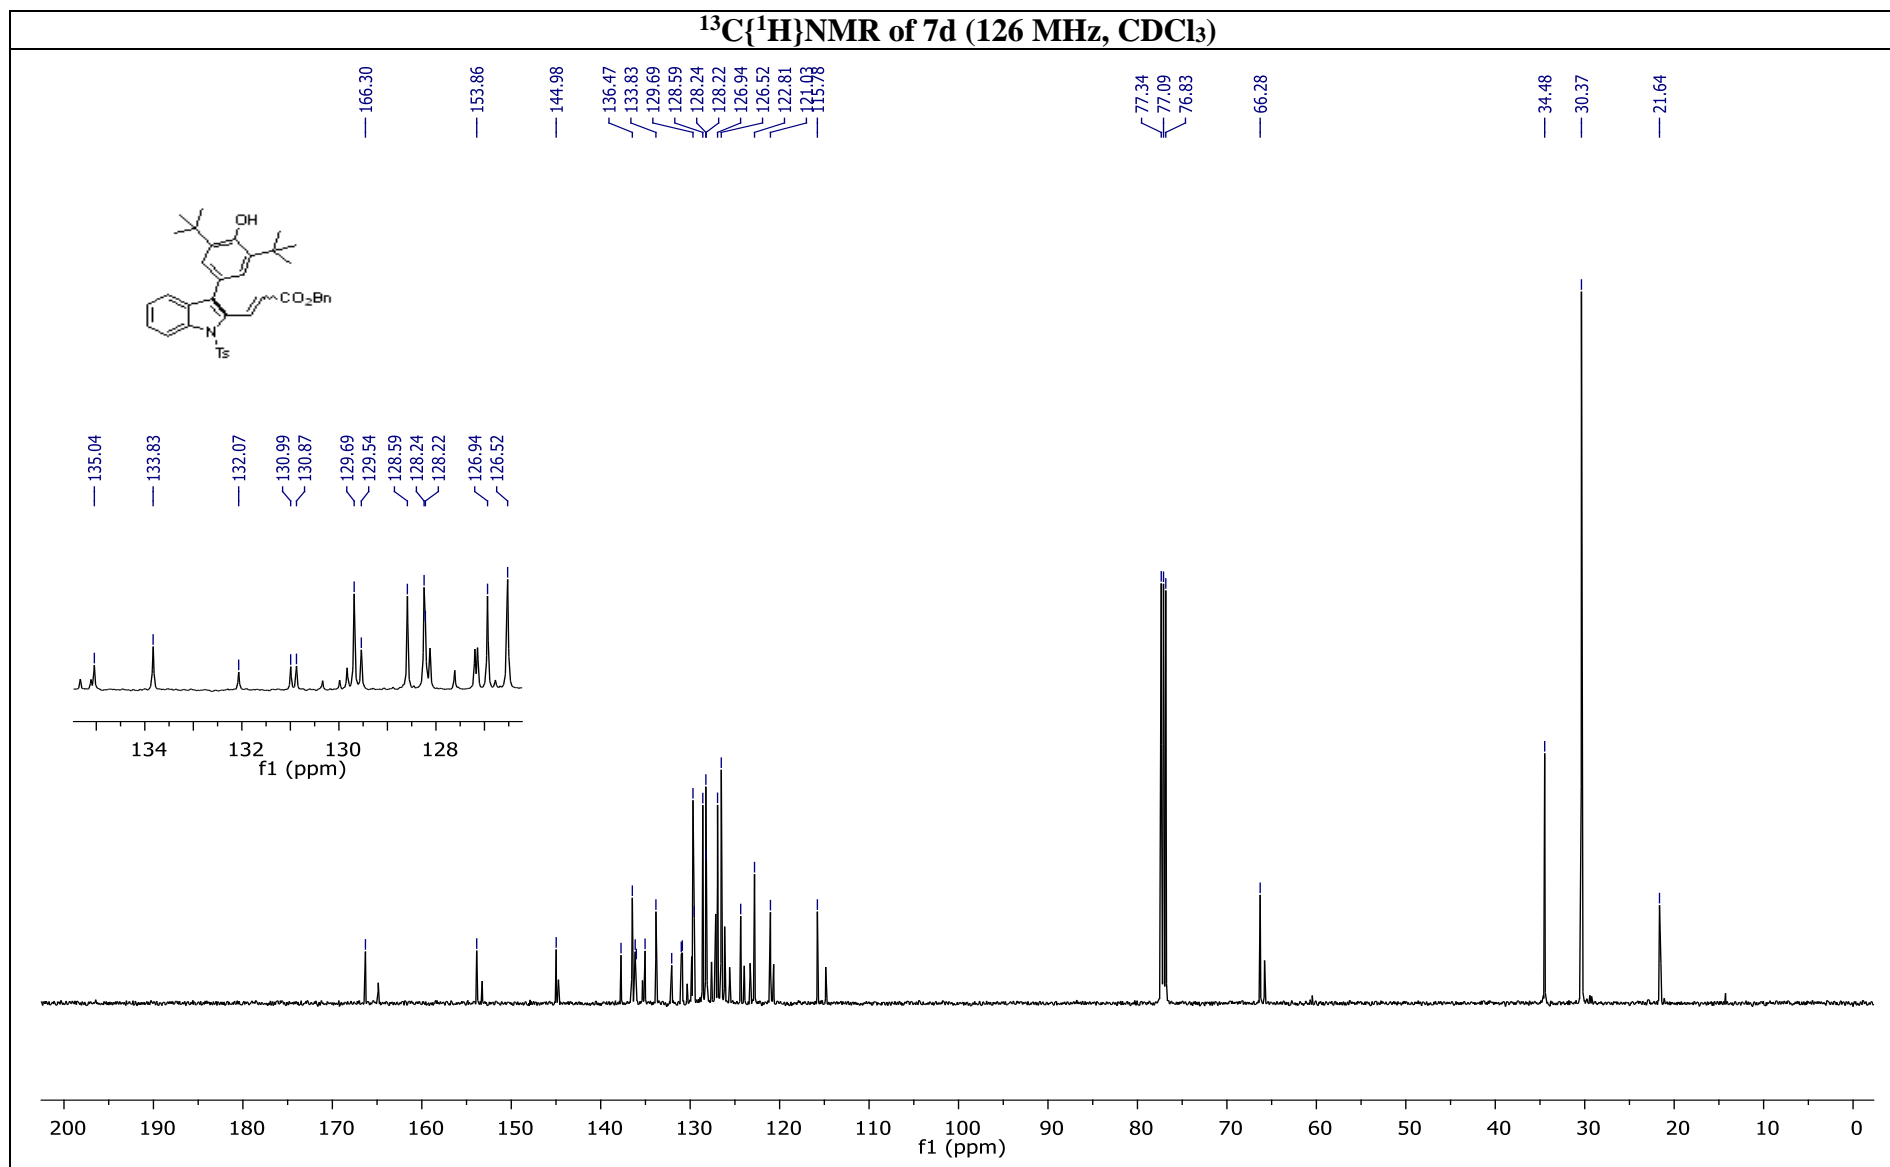

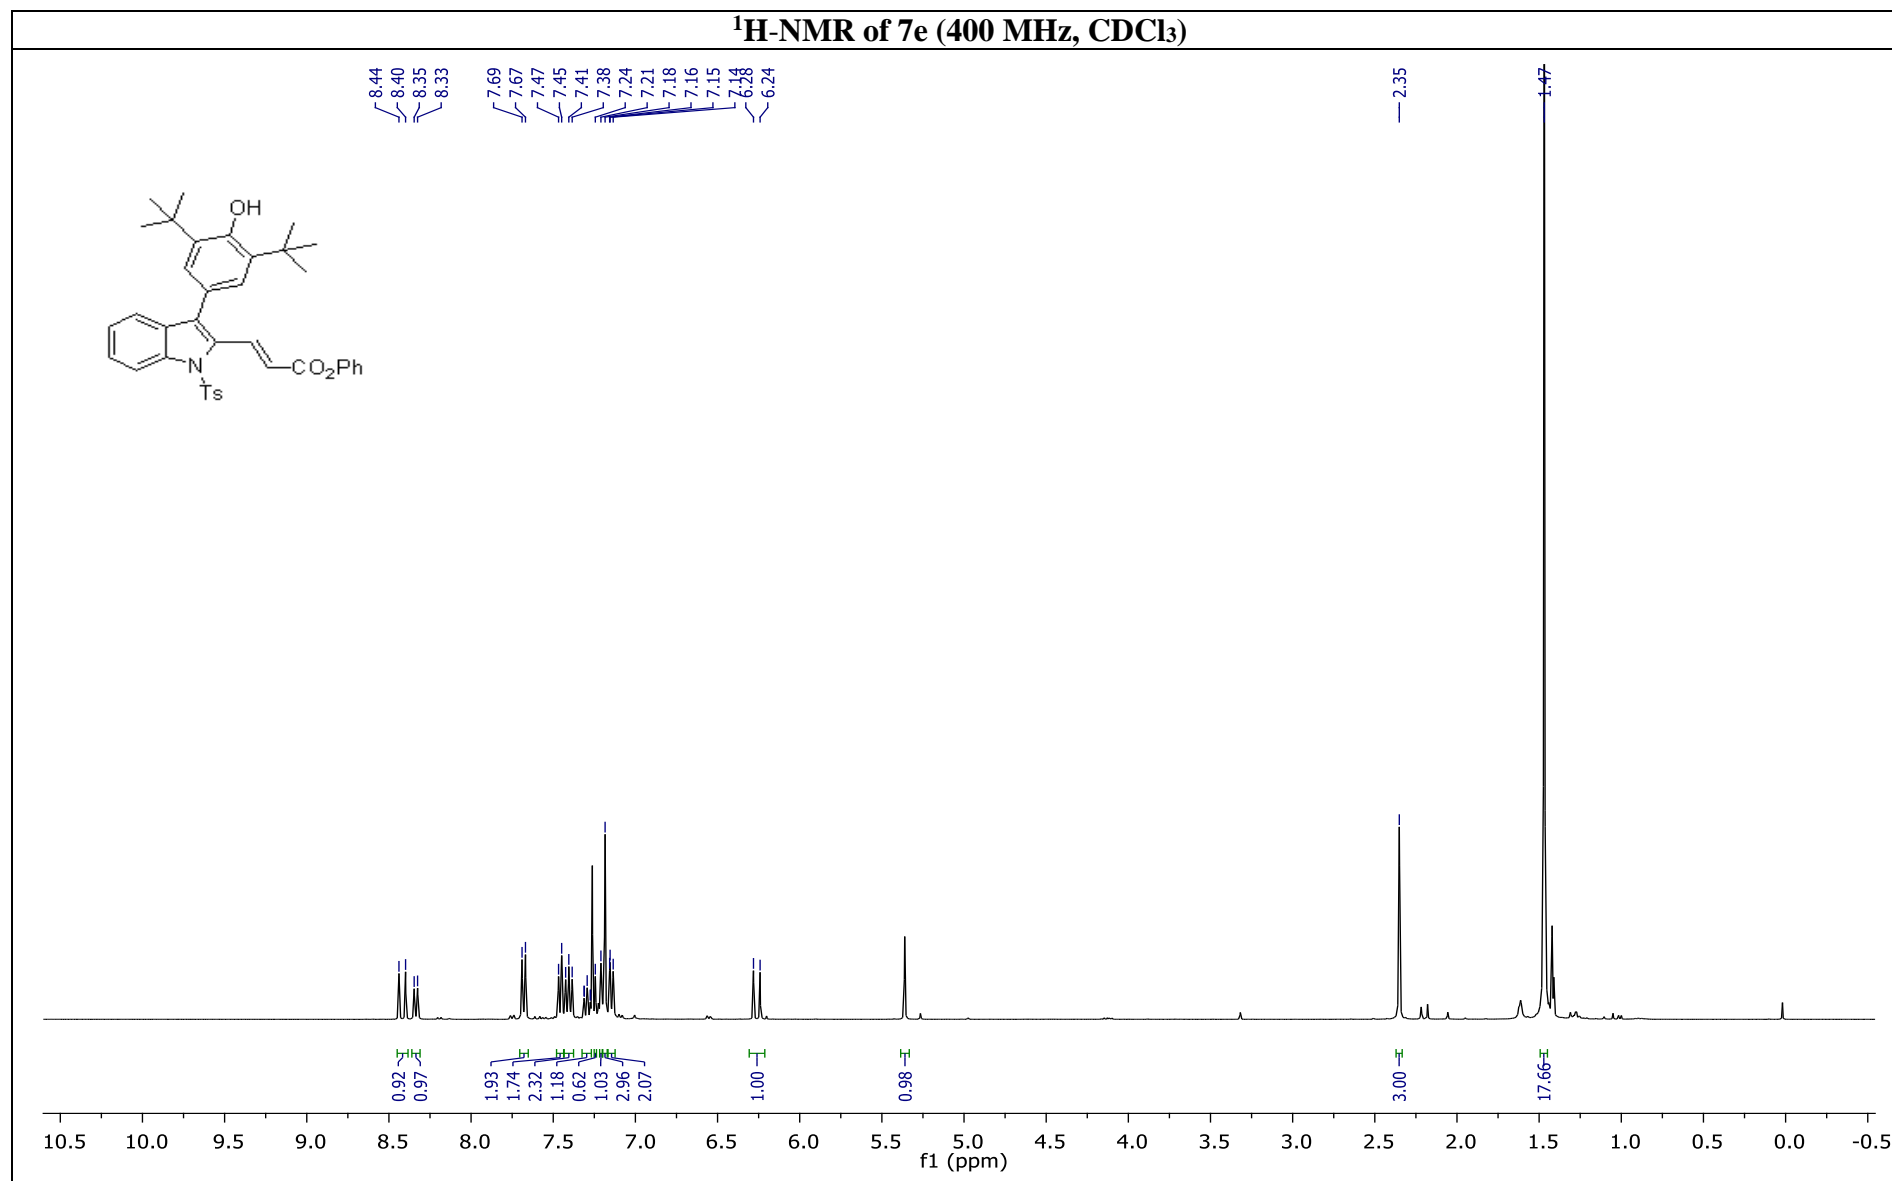

**$^{13}\text{C}\{^1\text{H}\}$ NMR of 7e (101 MHz,  $\text{CDCl}_3$ )**

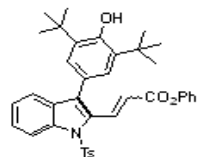

130.91  
130.87  
130.73  
129.74  
129.44  
126.97  
126.81  
126.56  
125.77  
124.49  
122.75  
121.94  
121.60  
121.17

165.05  
154.02  
150.85  
145.09  
136.62  
129.74  
129.44  
126.97  
126.81  
126.56  
125.77  
121.94  
121.60  
121.17

77.41  
77.09  
76.77

34.55  
30.42  
21.66

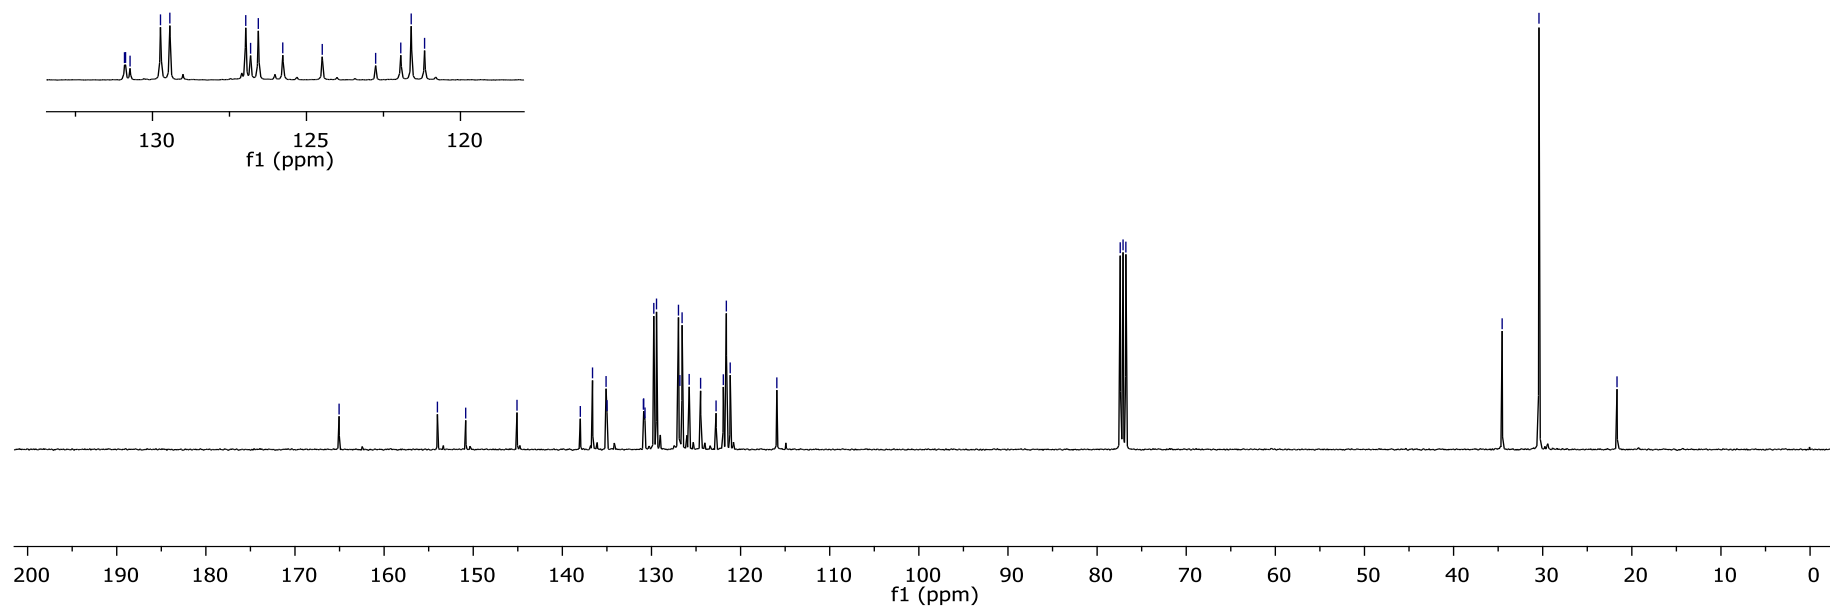

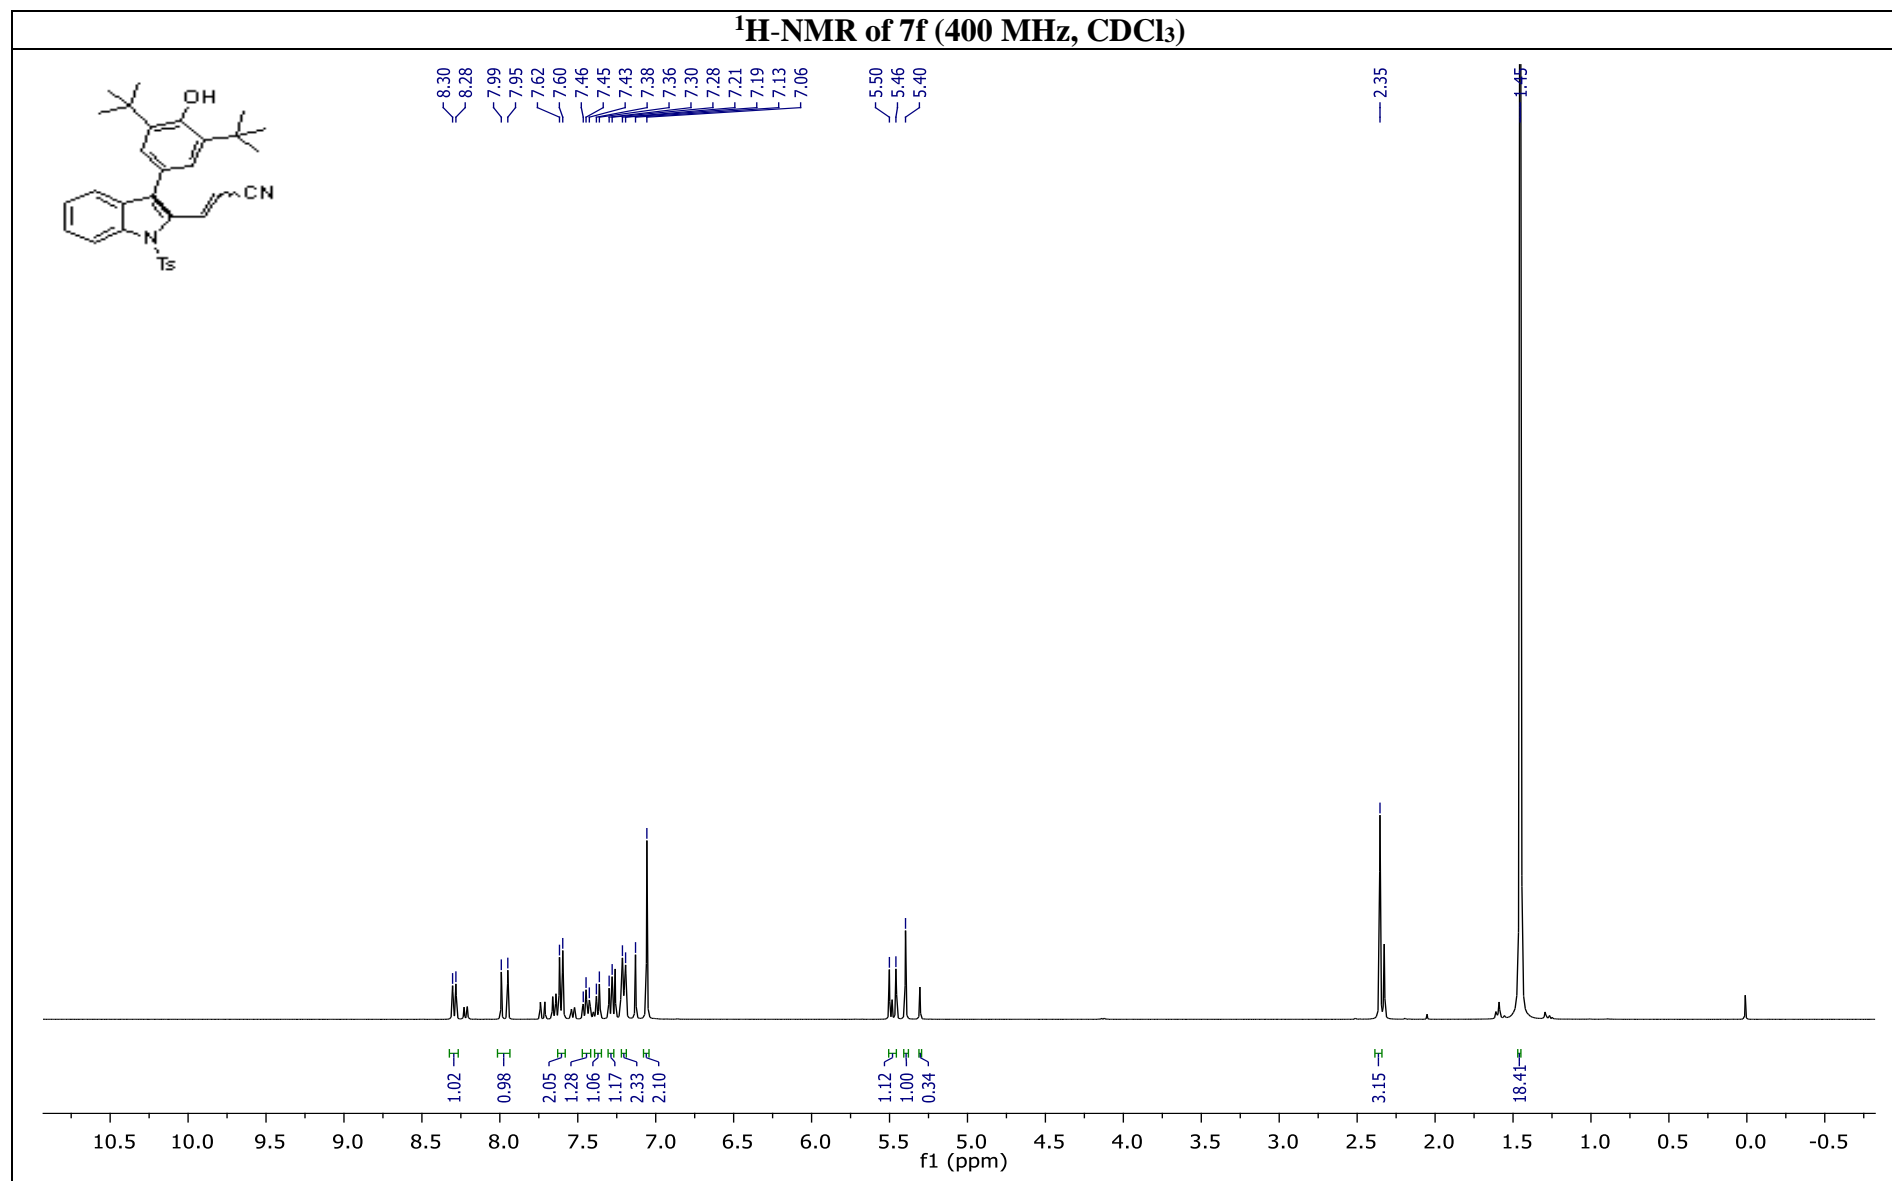

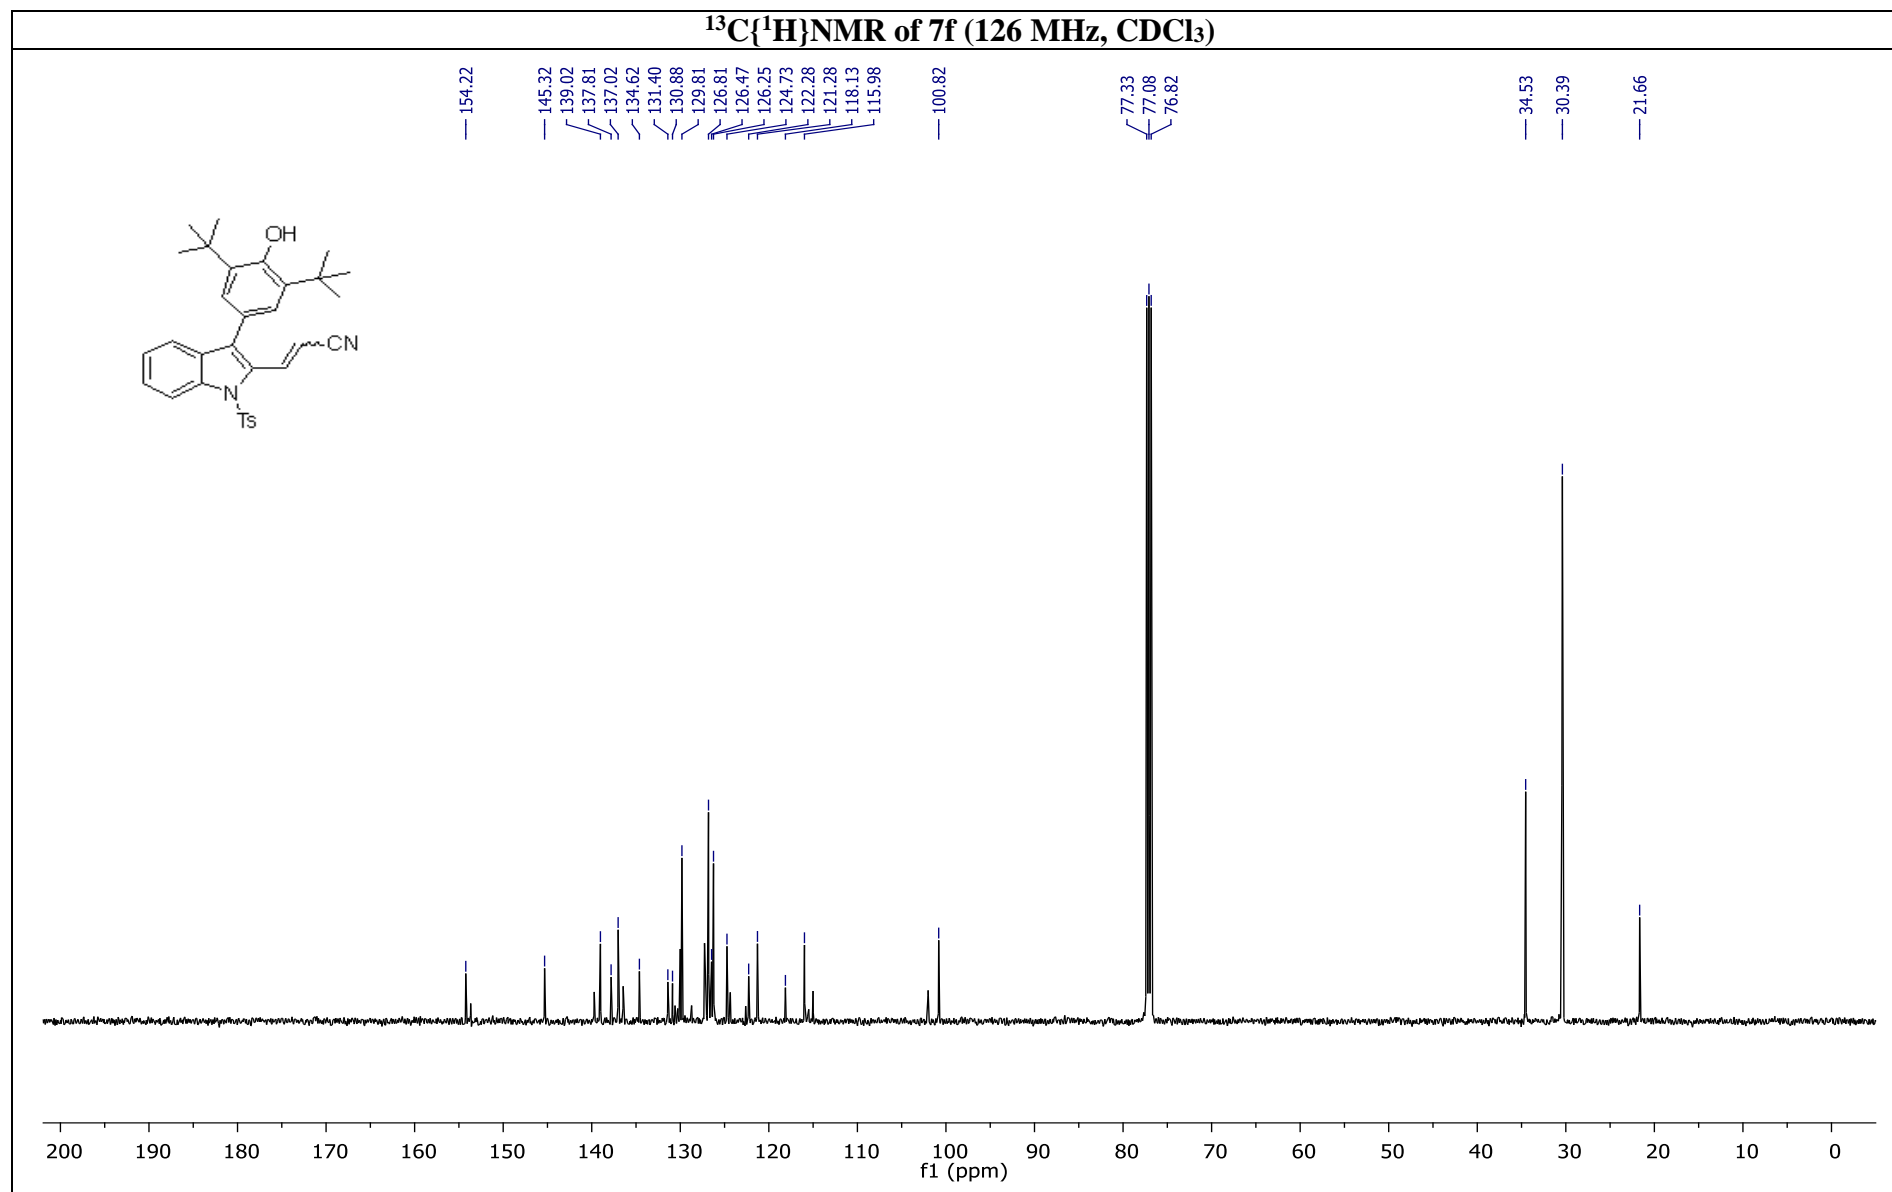

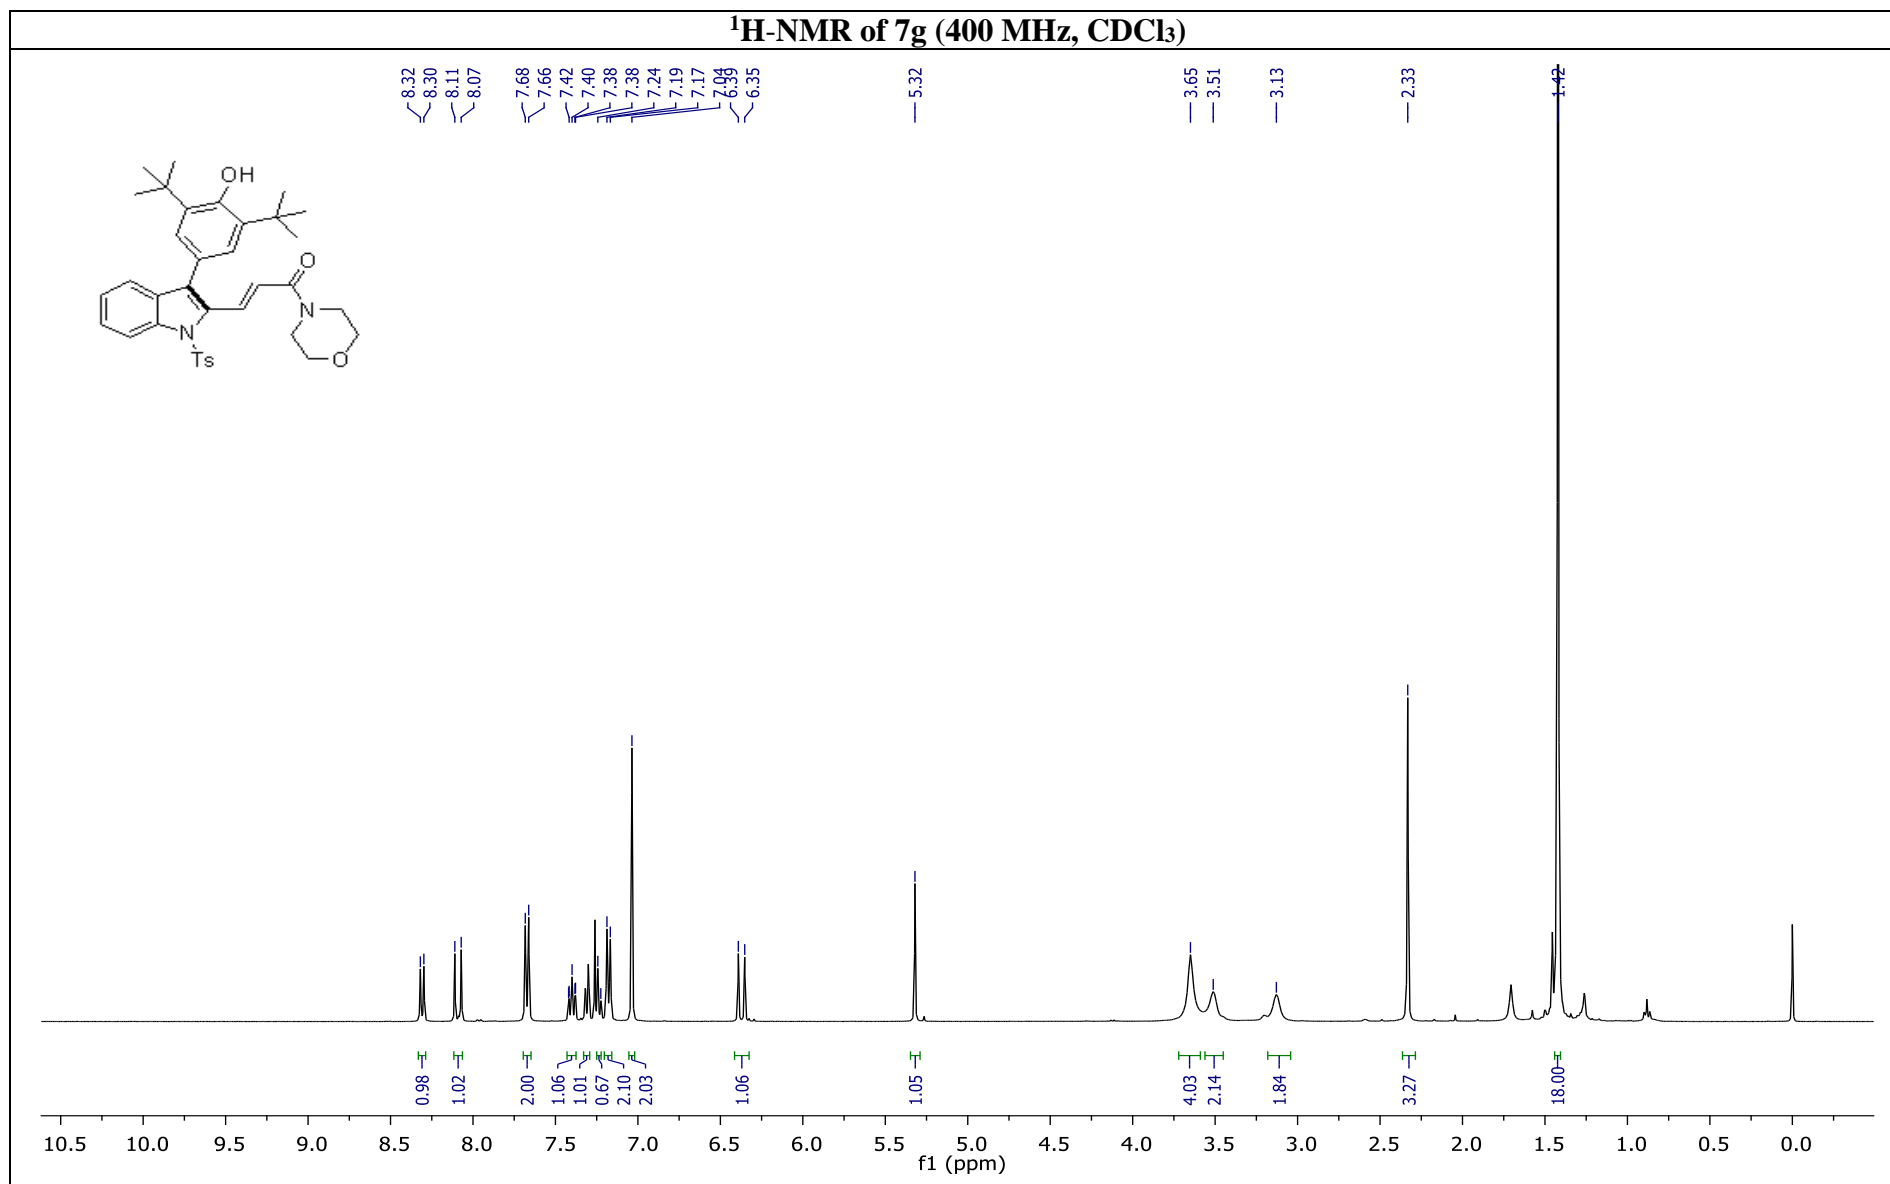

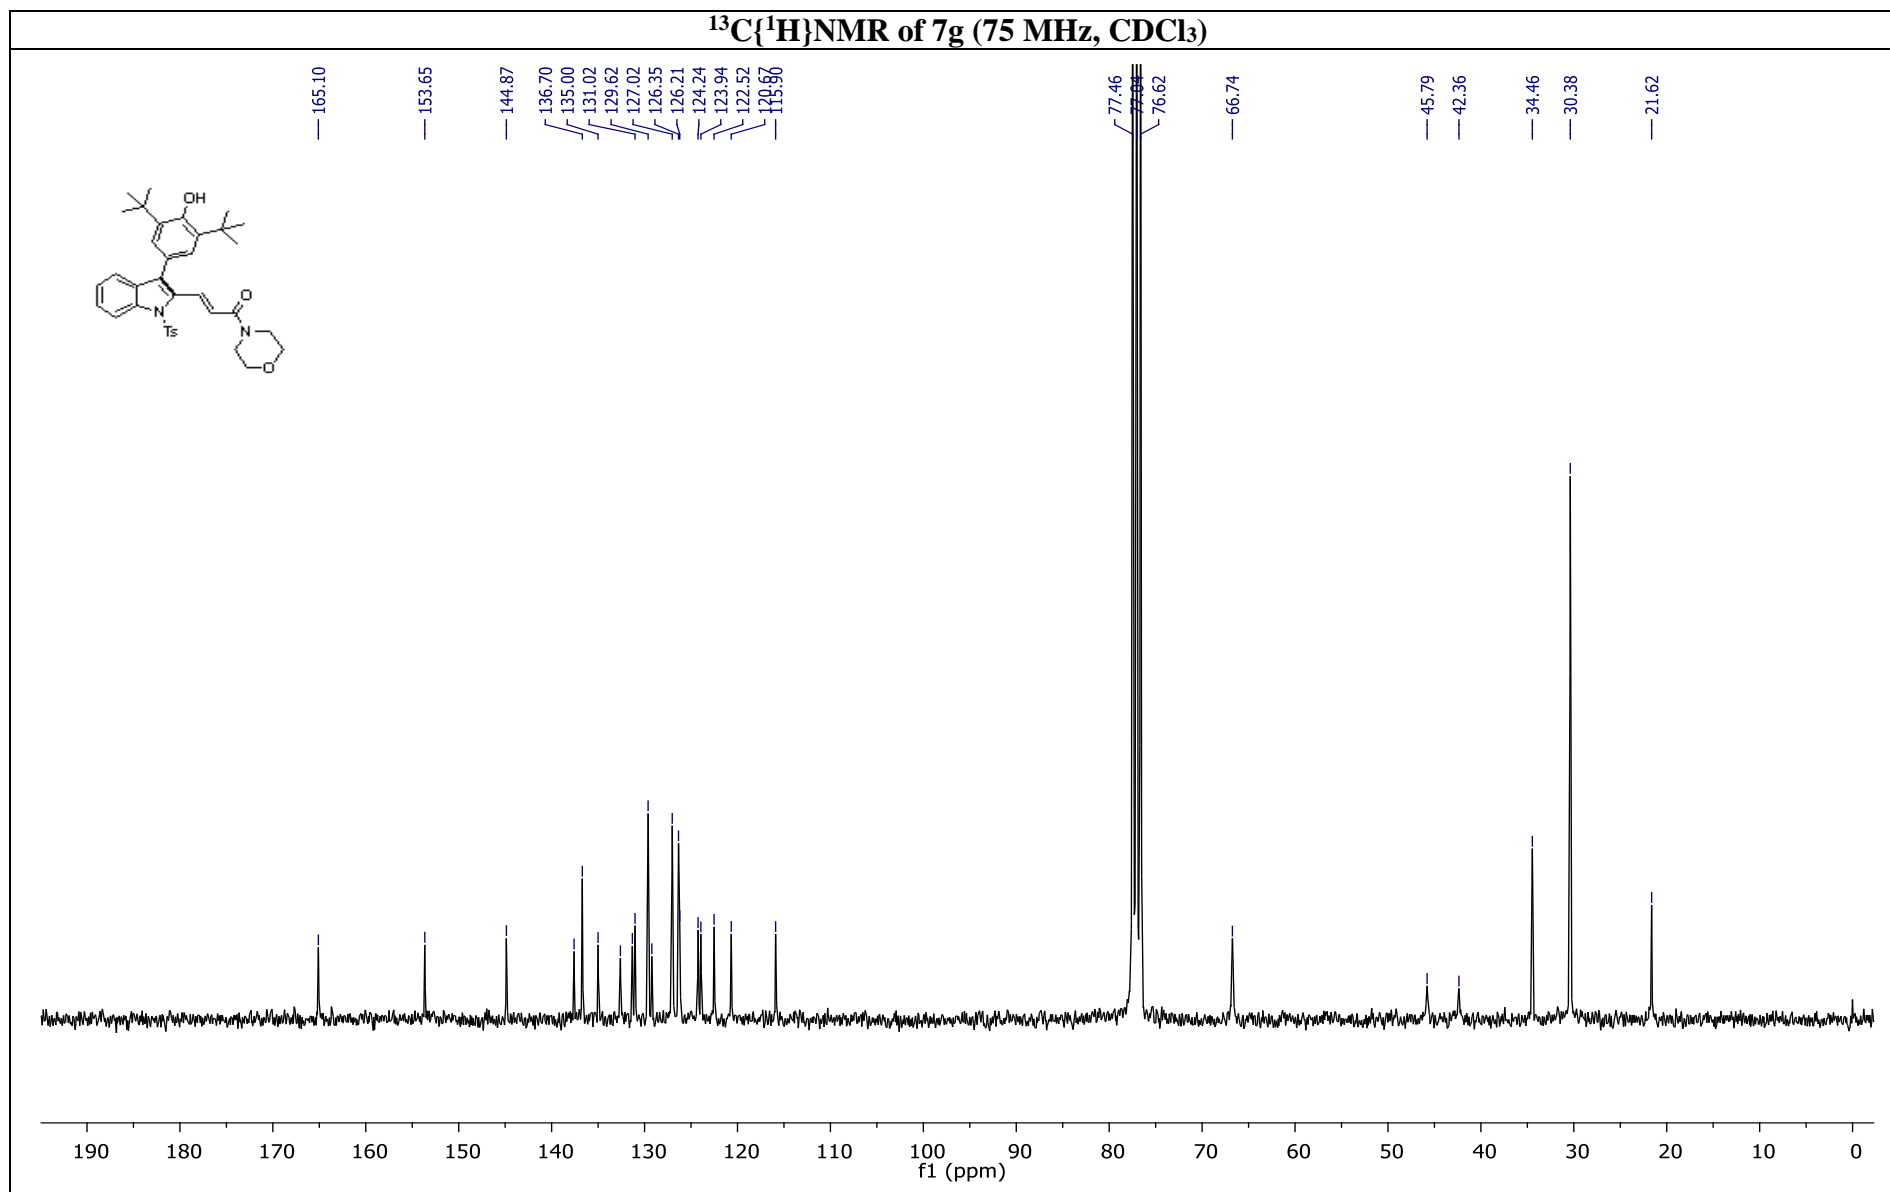

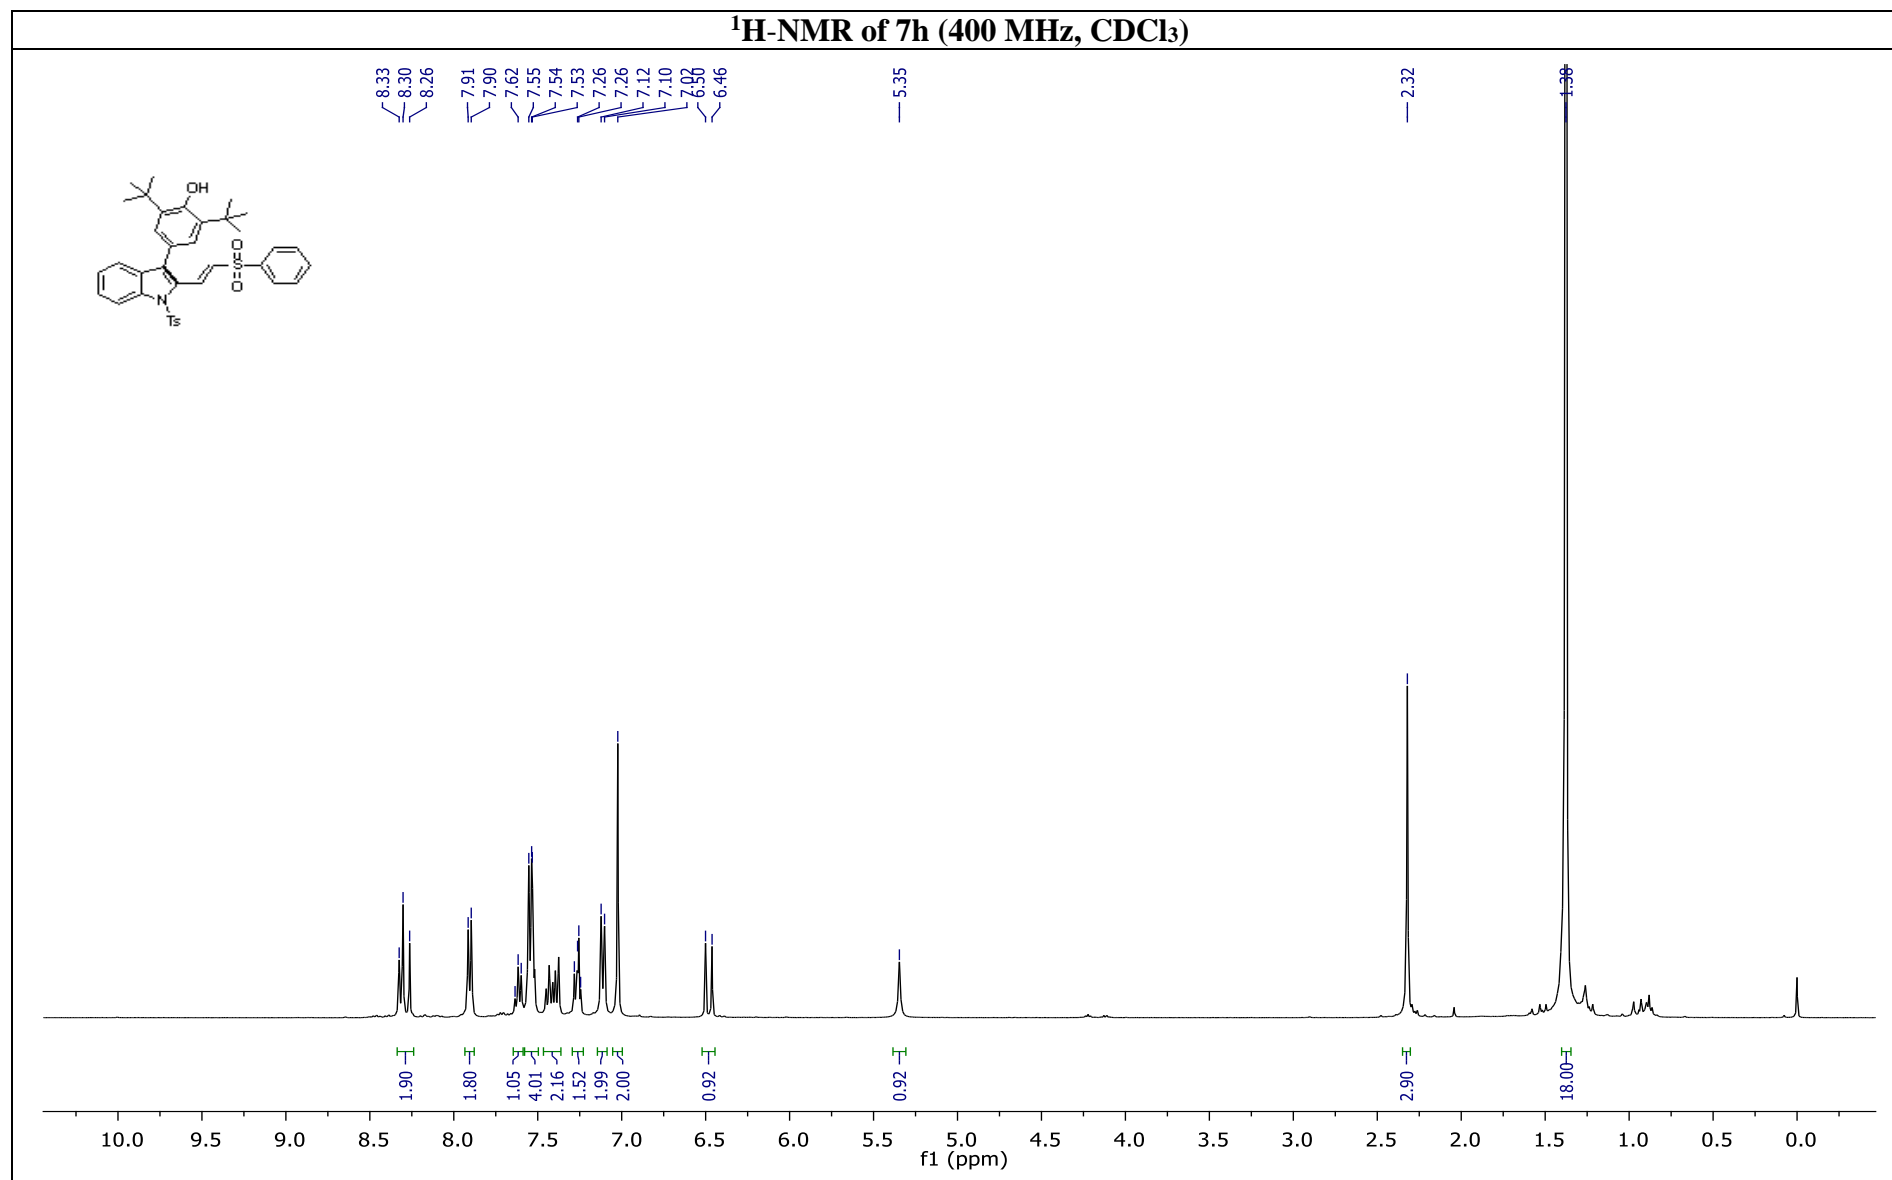

**$^{13}\text{C}\{^1\text{H}\}$ NMR of 7h (126 MHz,  $\text{CDCl}_3$ )**

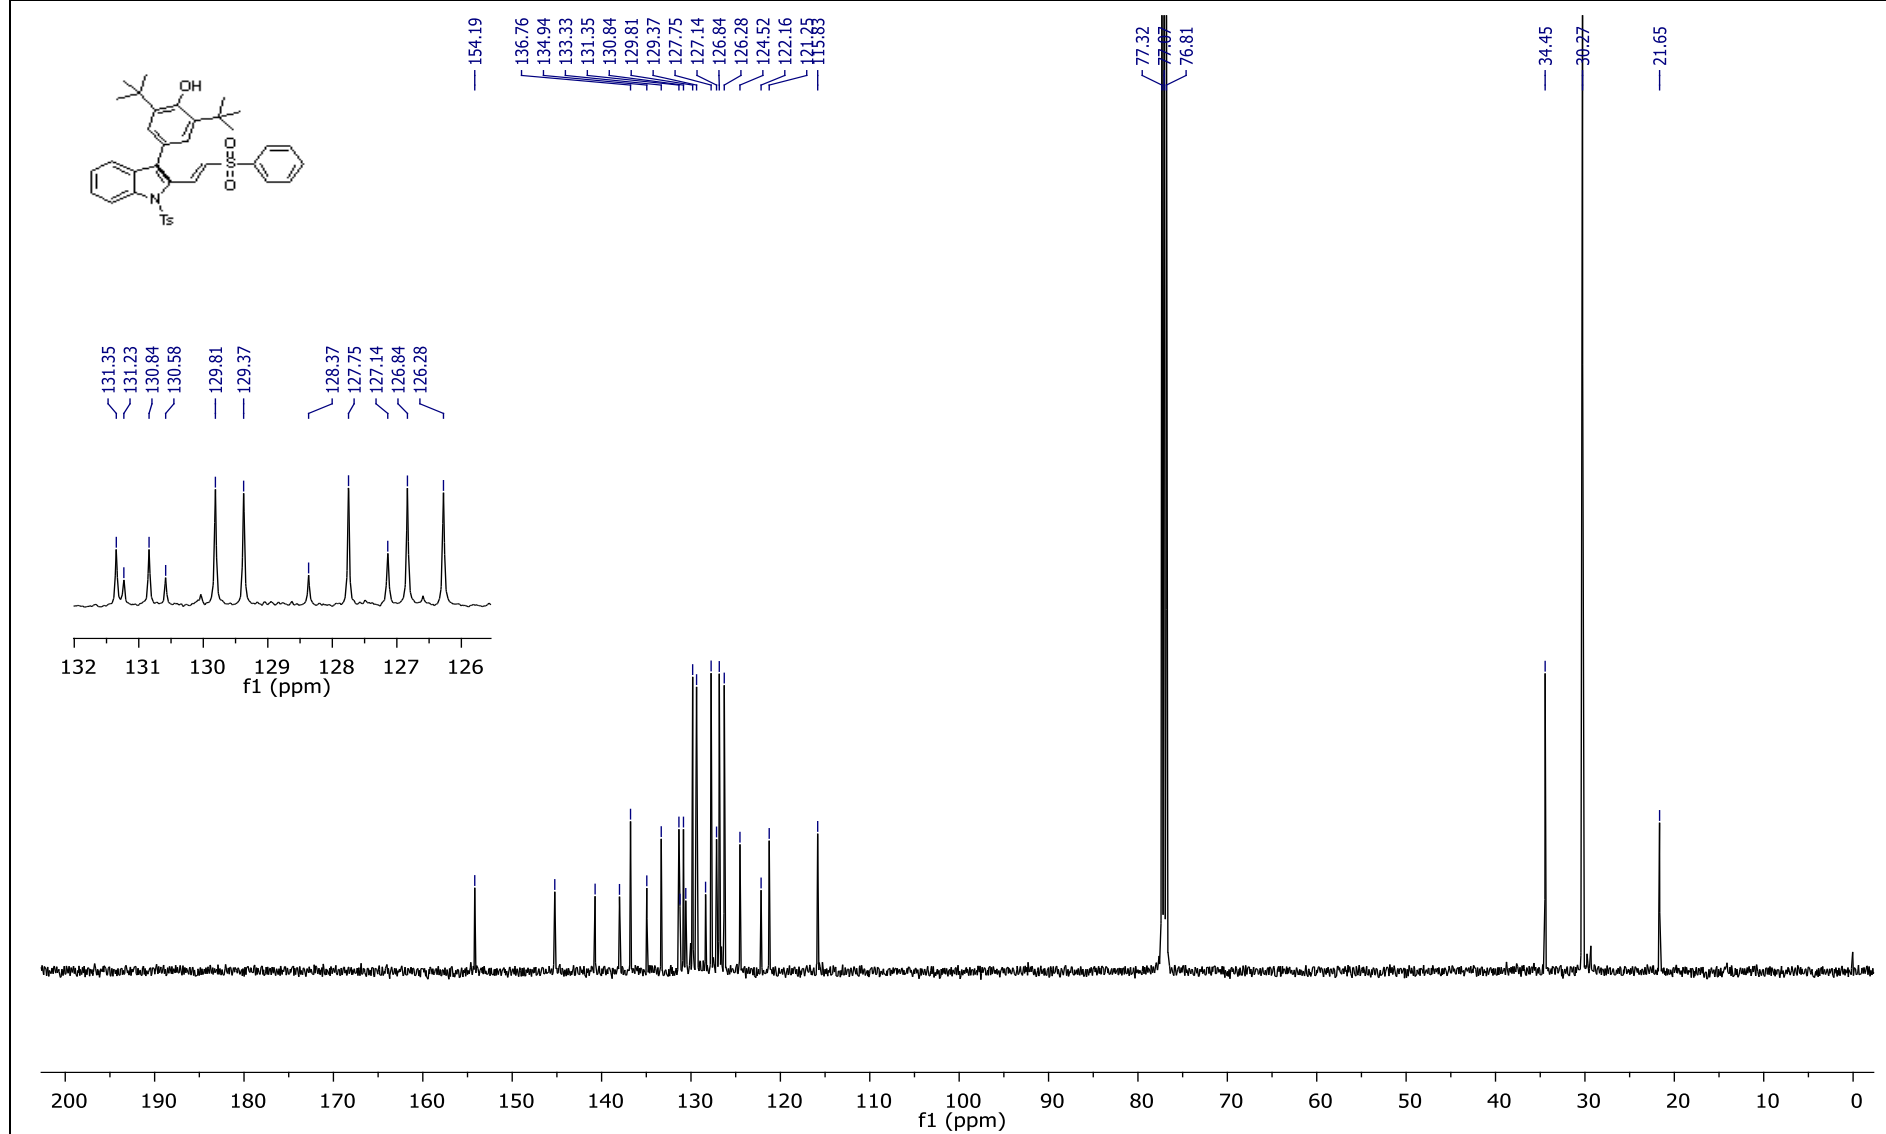

**<sup>1</sup>H-NMR of 7i (500 MHz, CDCl<sub>3</sub>)**

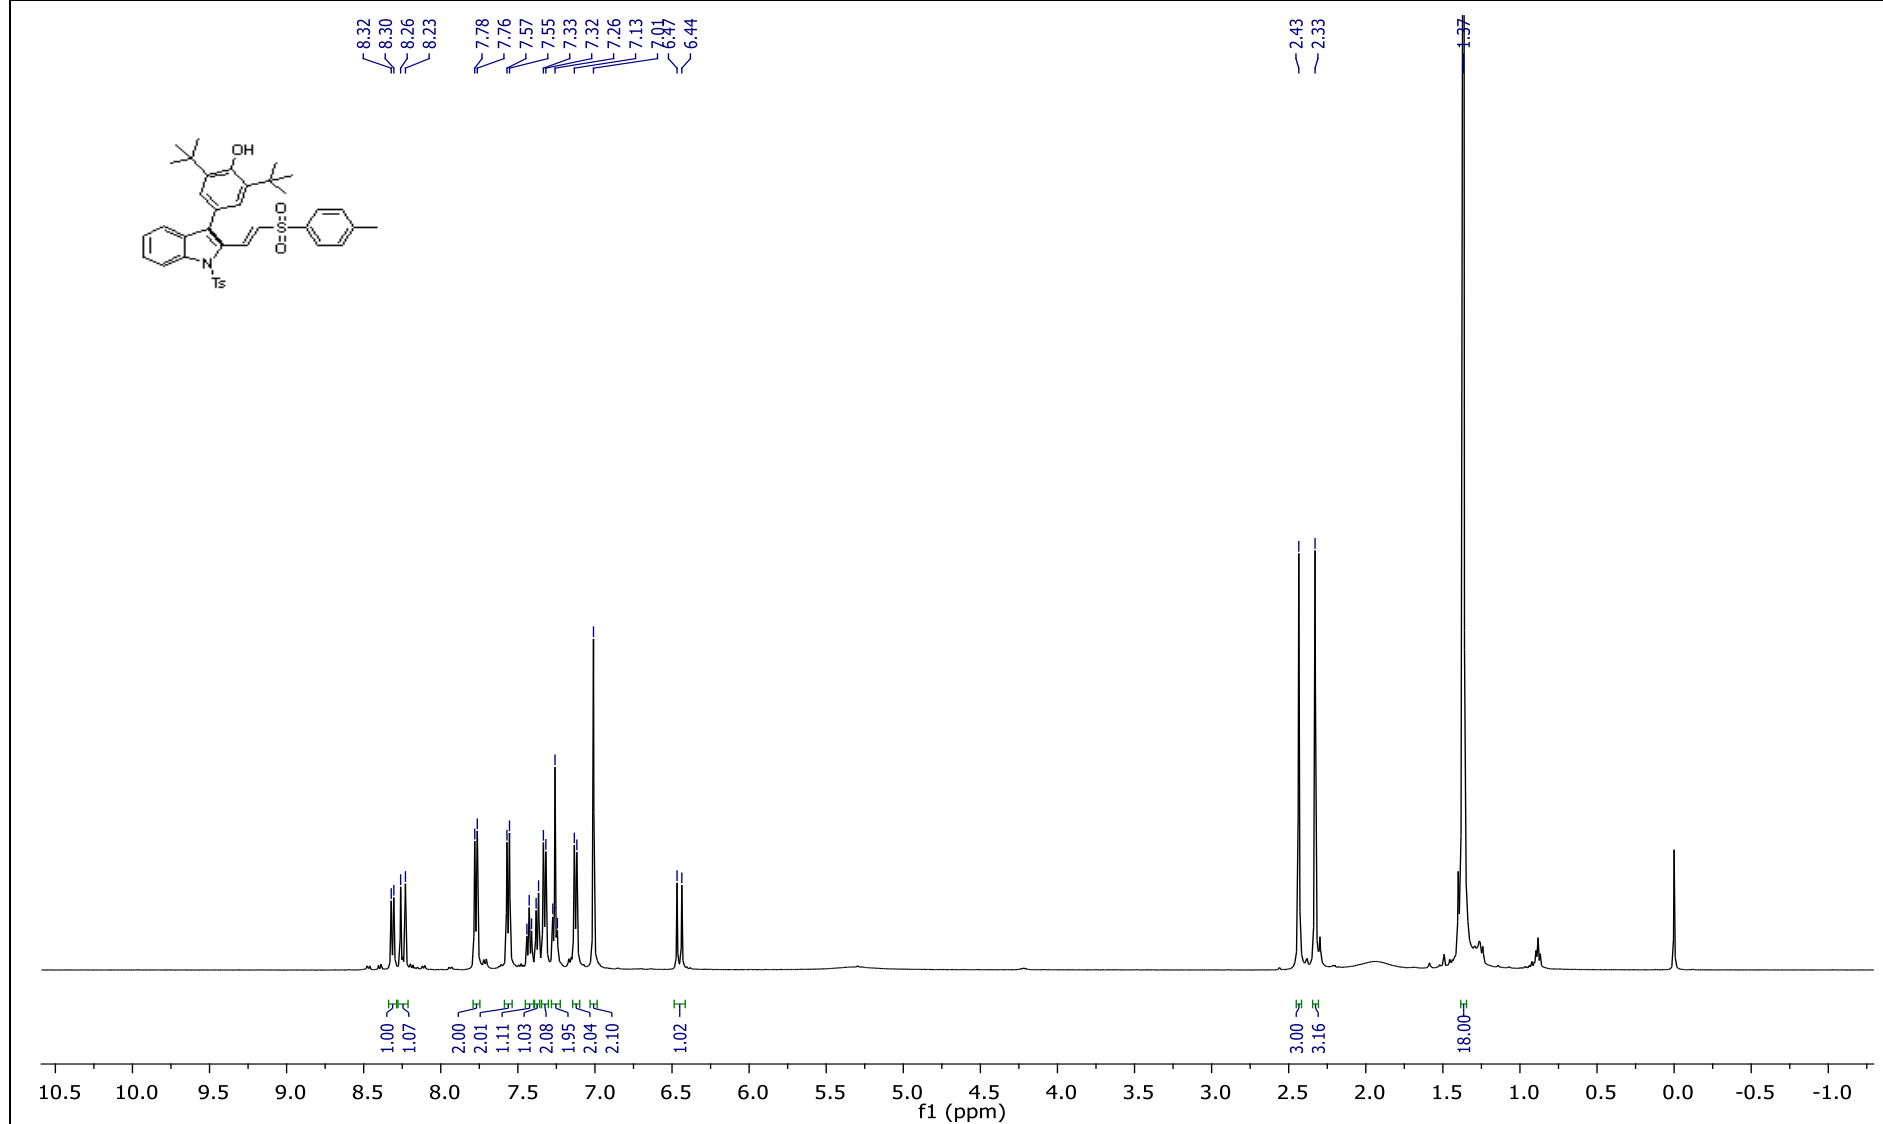

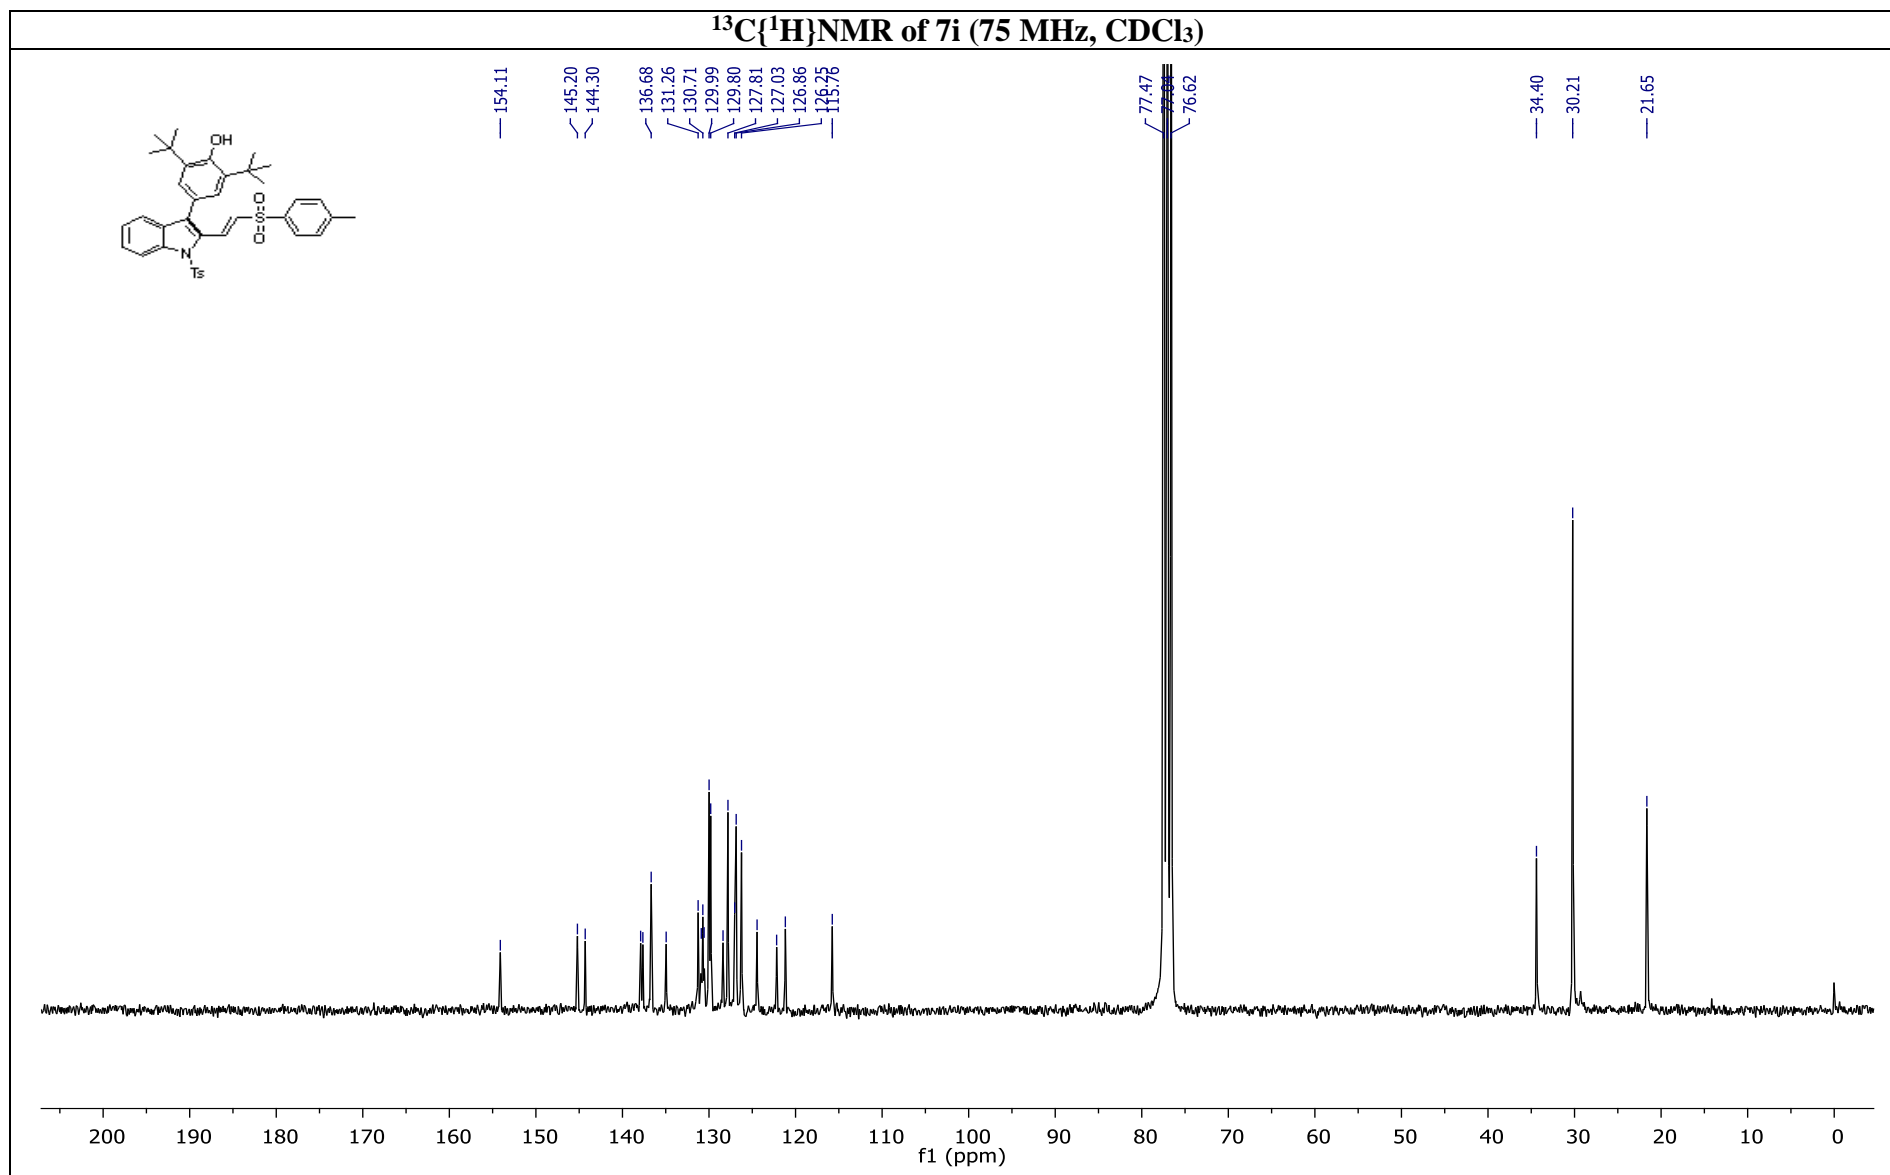

DEPT-NMR of 7i (135 MHz, CDCl<sub>3</sub>)

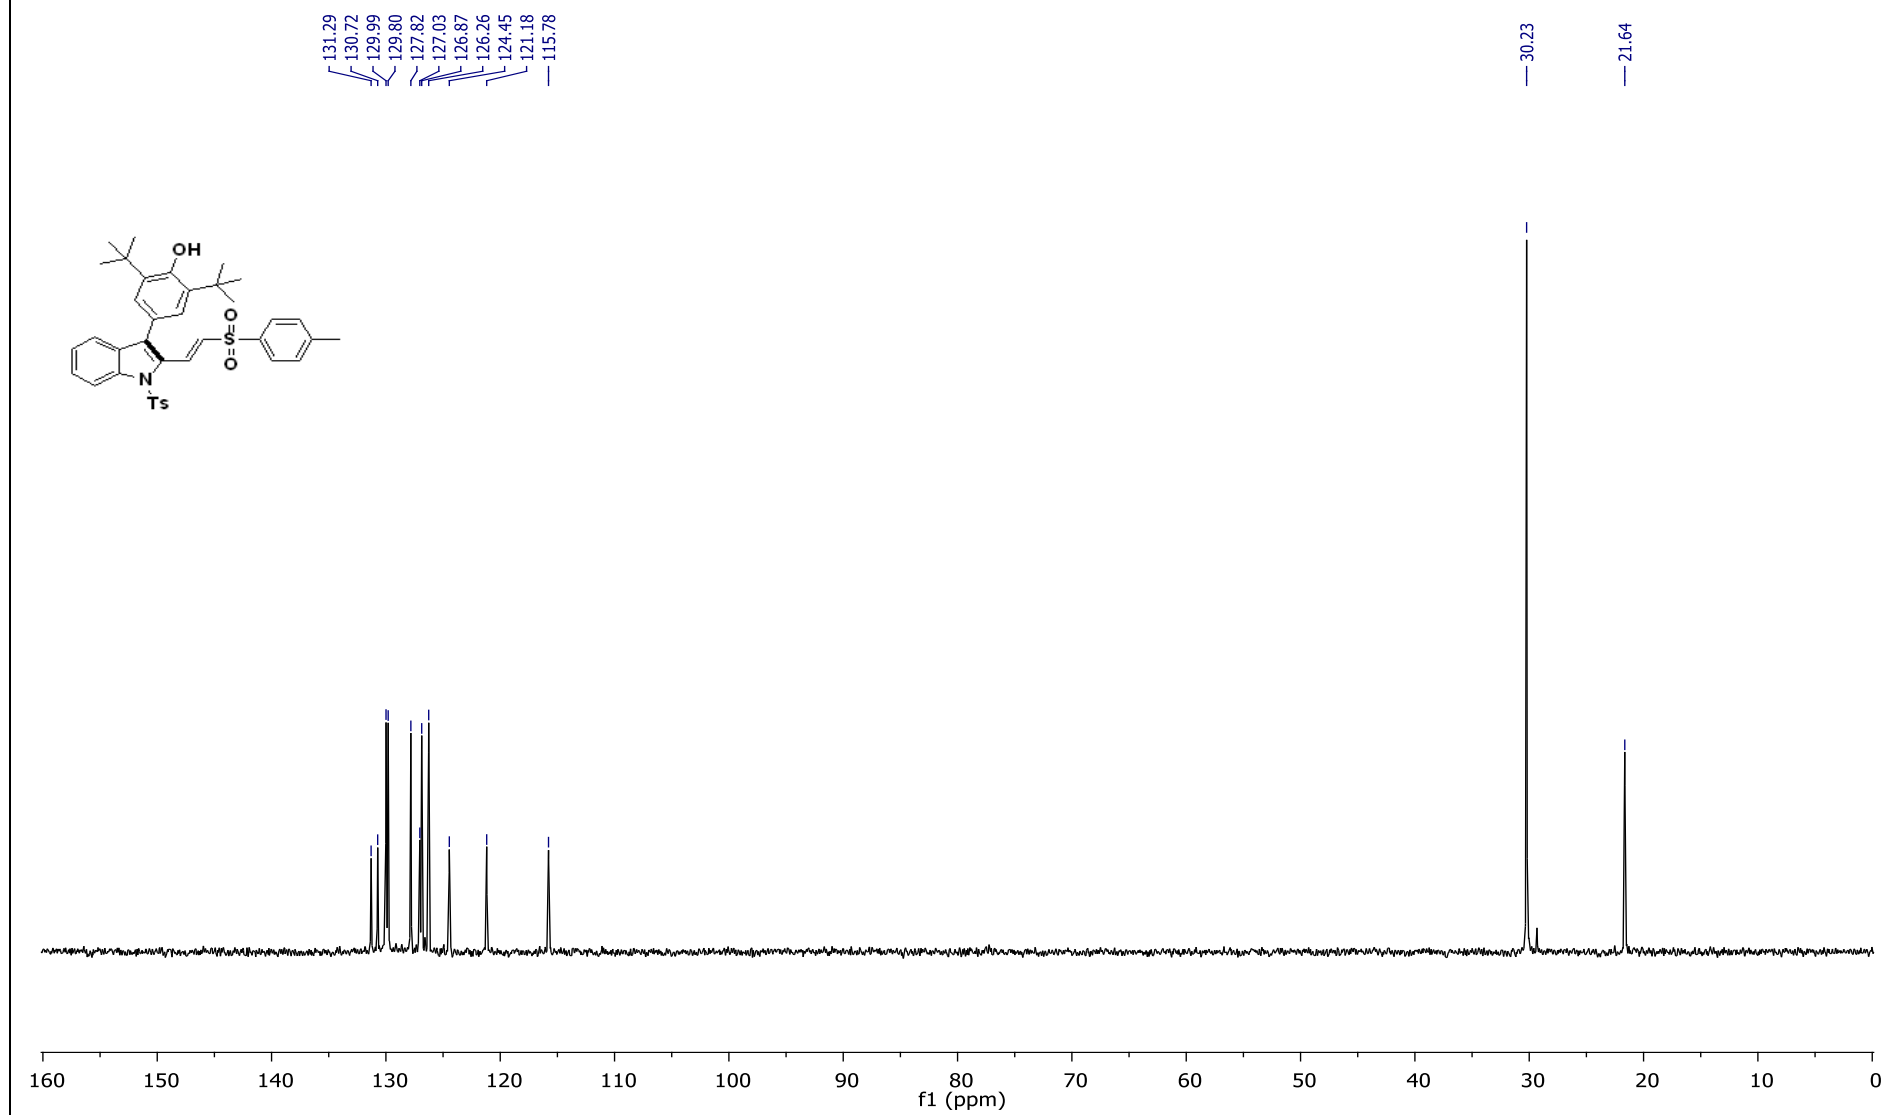

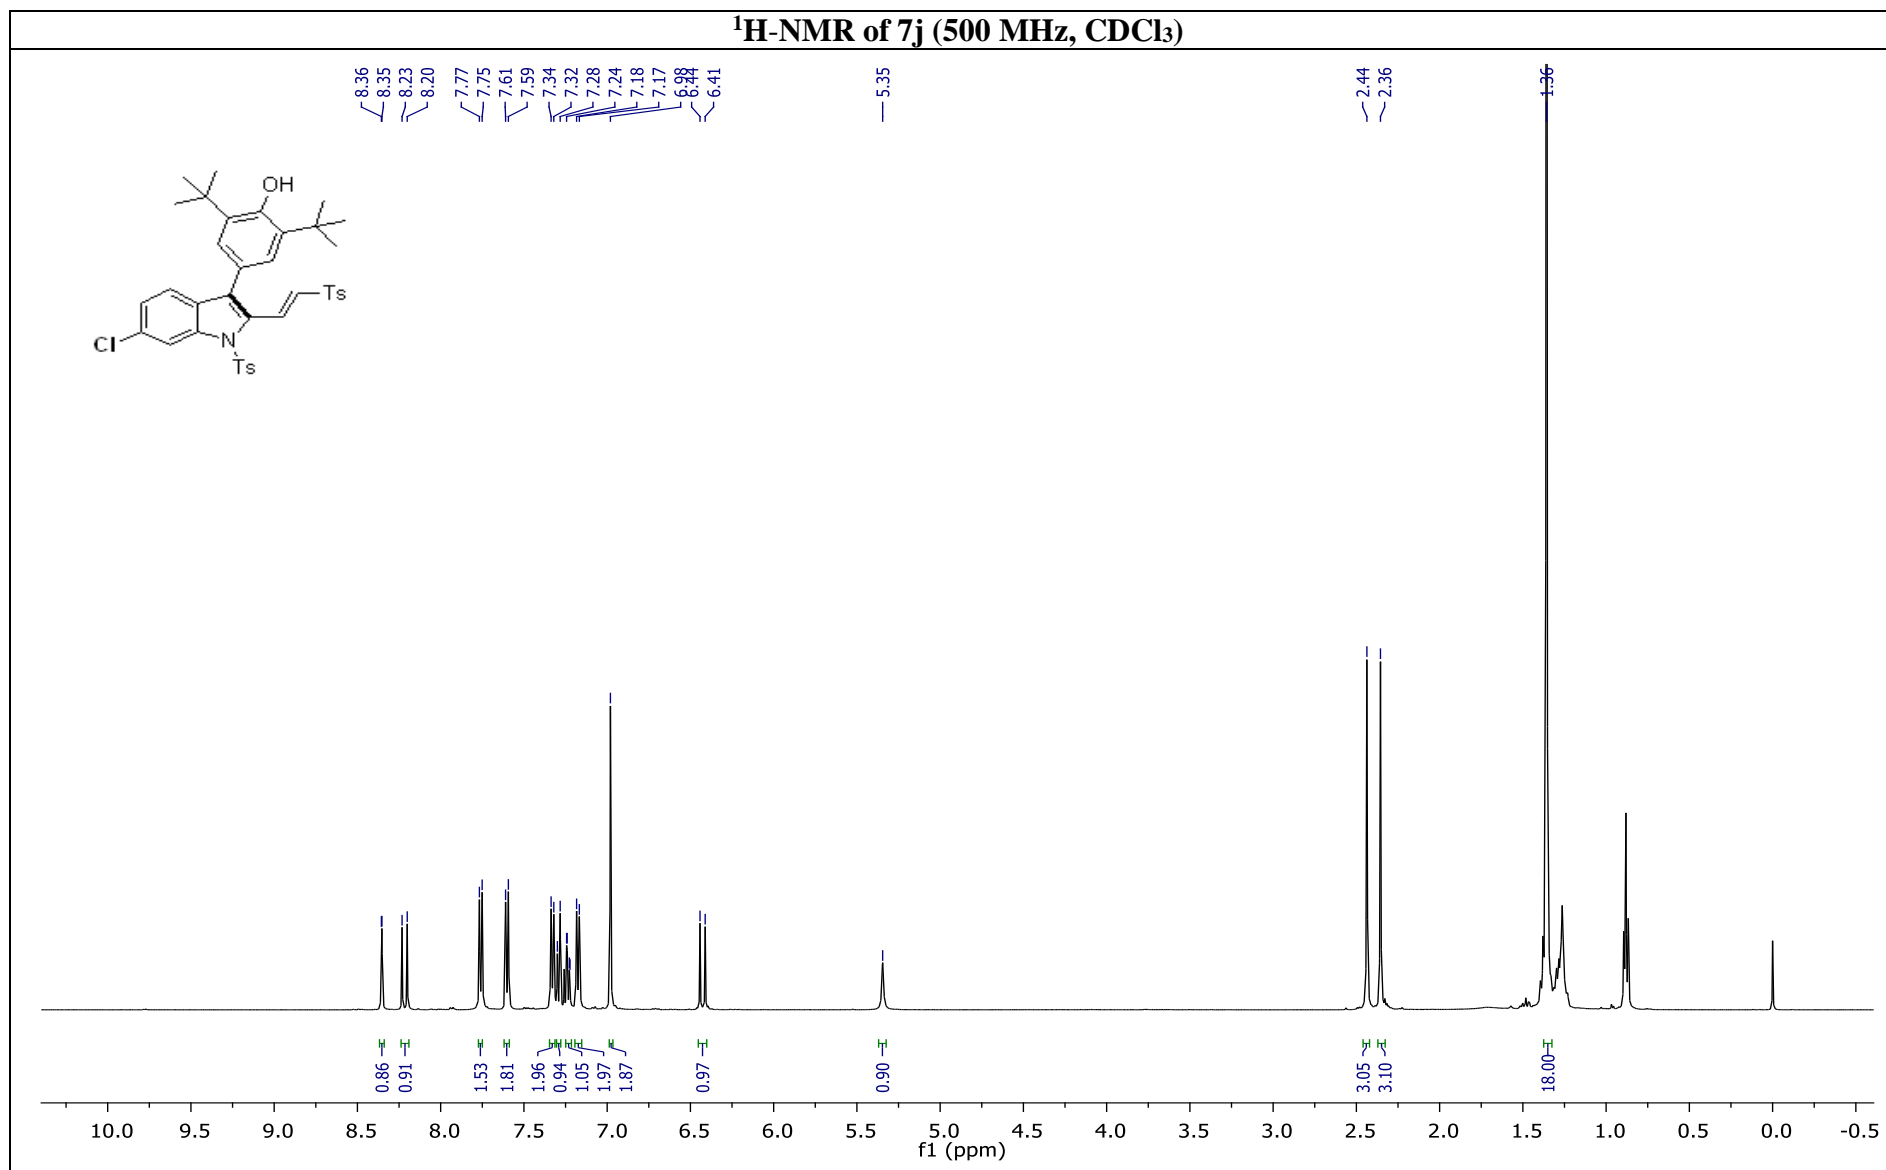

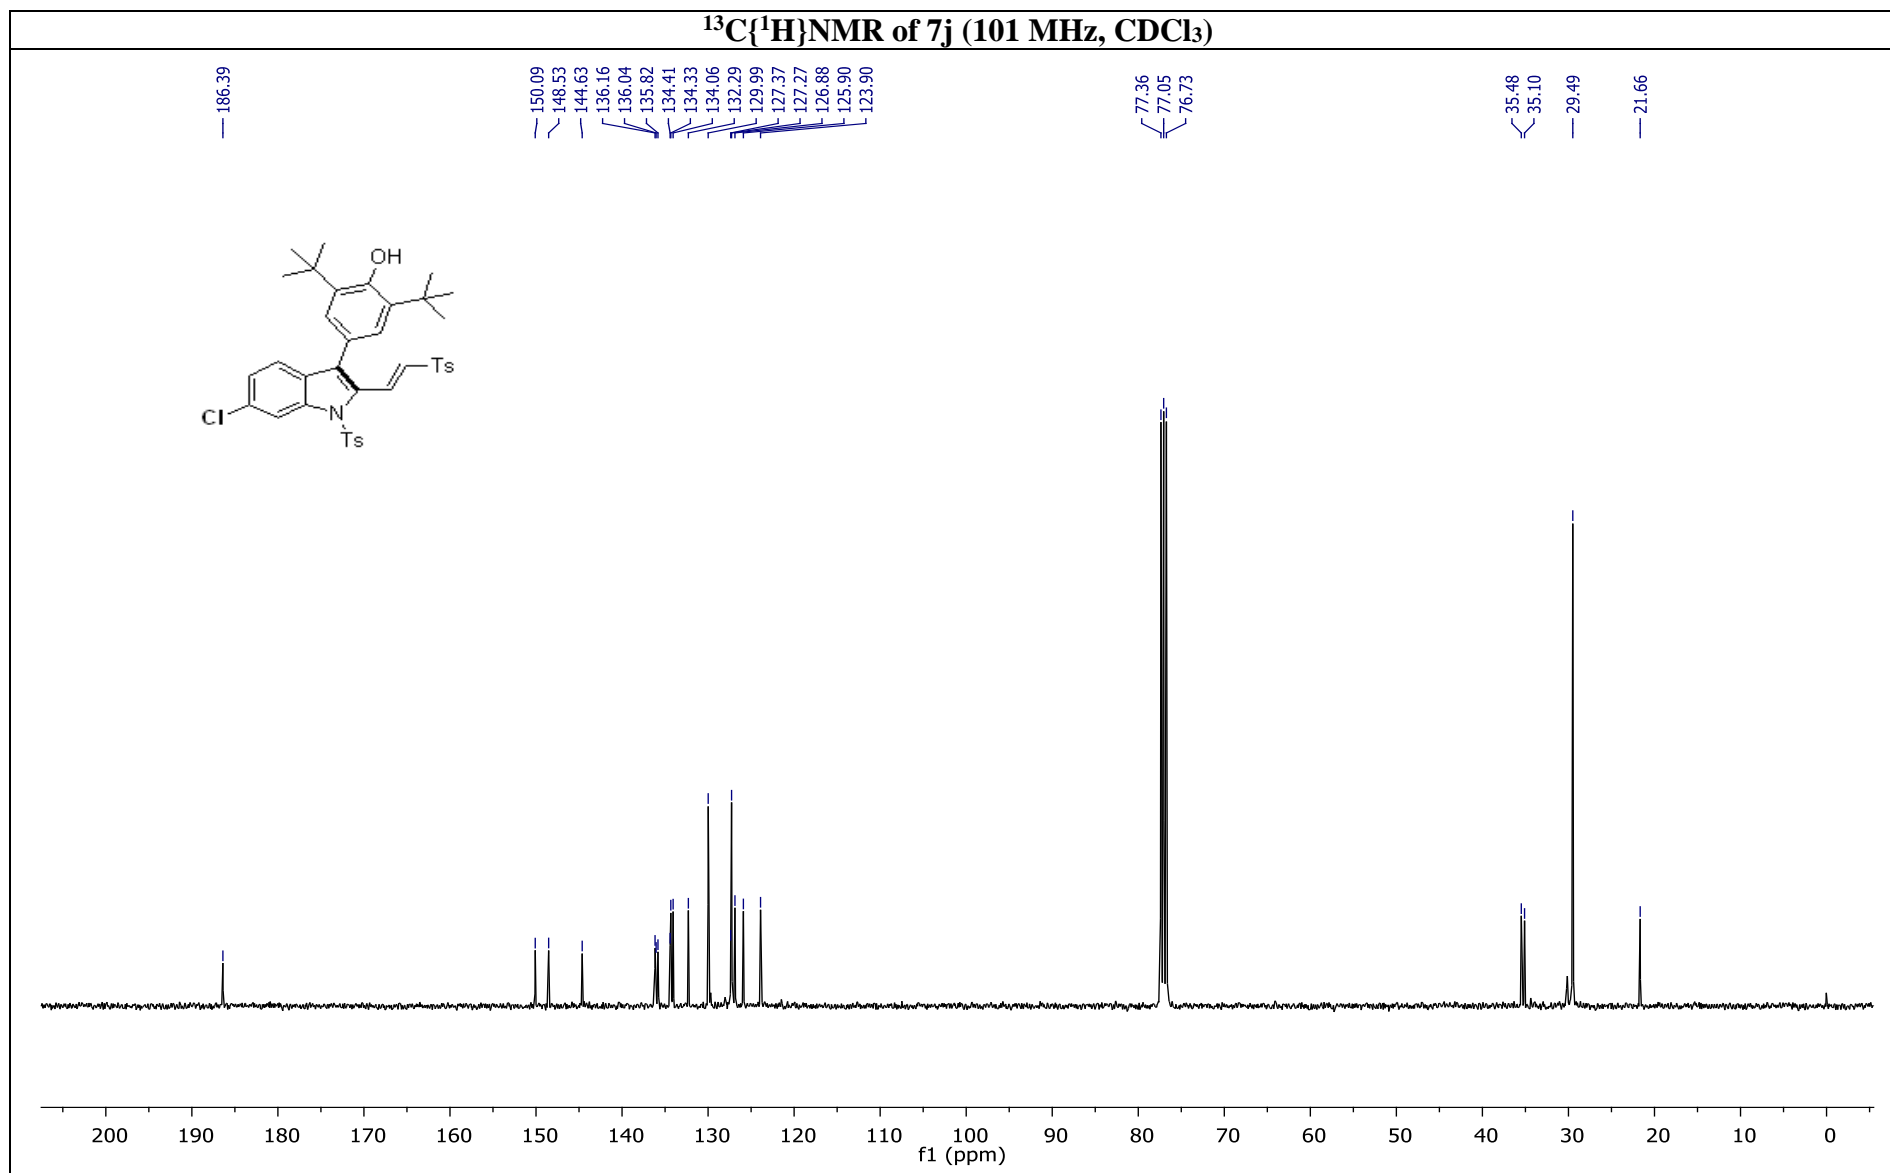

**<sup>1</sup>H-NMR of 7k (400 MHz, CDCl<sub>3</sub>)**

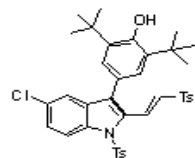

8.26  
8.23  
8.19  
7.77  
7.75  
7.57  
7.55  
7.38  
7.35  
7.34  
7.32  
7.16  
7.14  
6.94  
6.40

2.44  
2.34

1.37

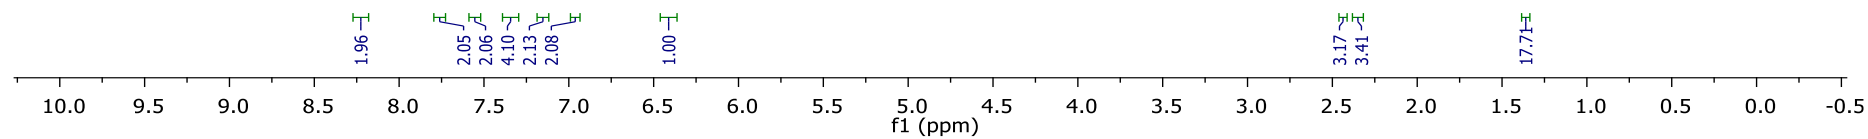

**$^{13}\text{C}\{^1\text{H}\}$ NMR of 7k (101 MHz,  $\text{CDCl}_3$ )**

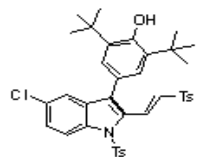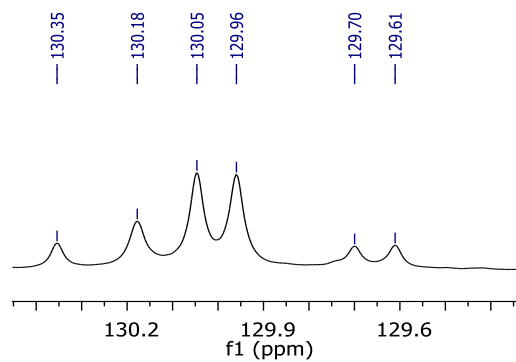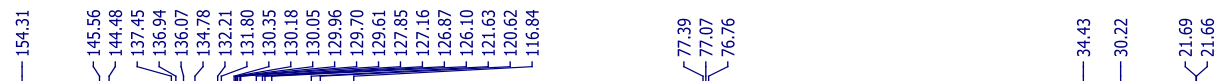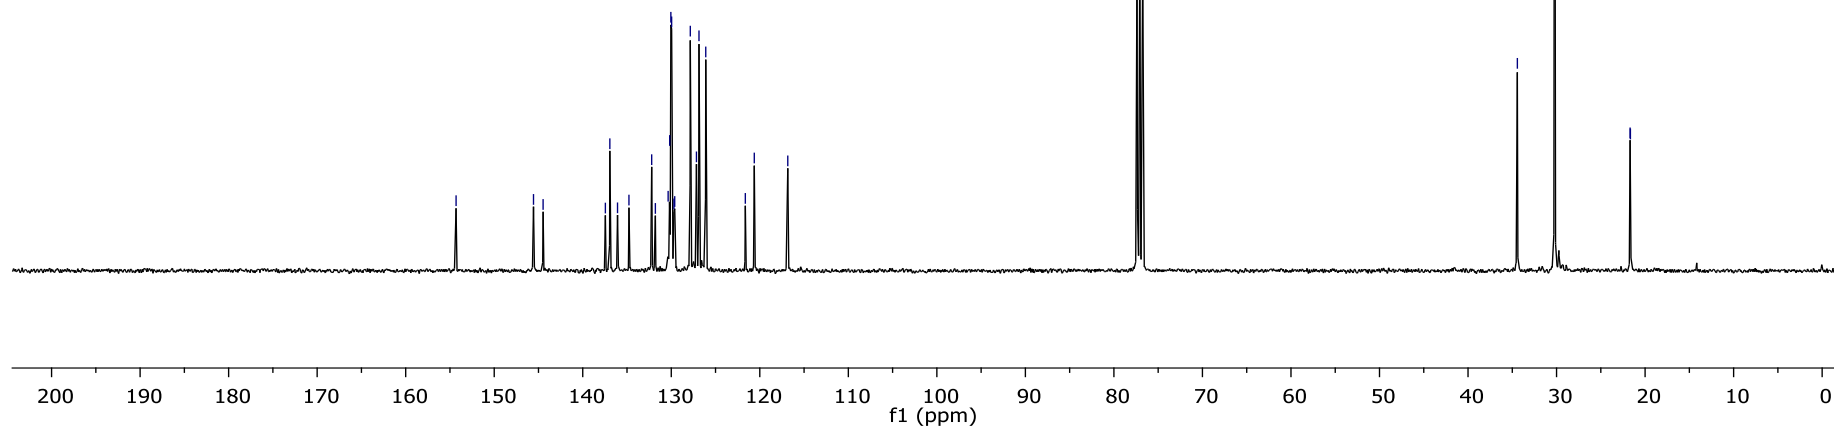

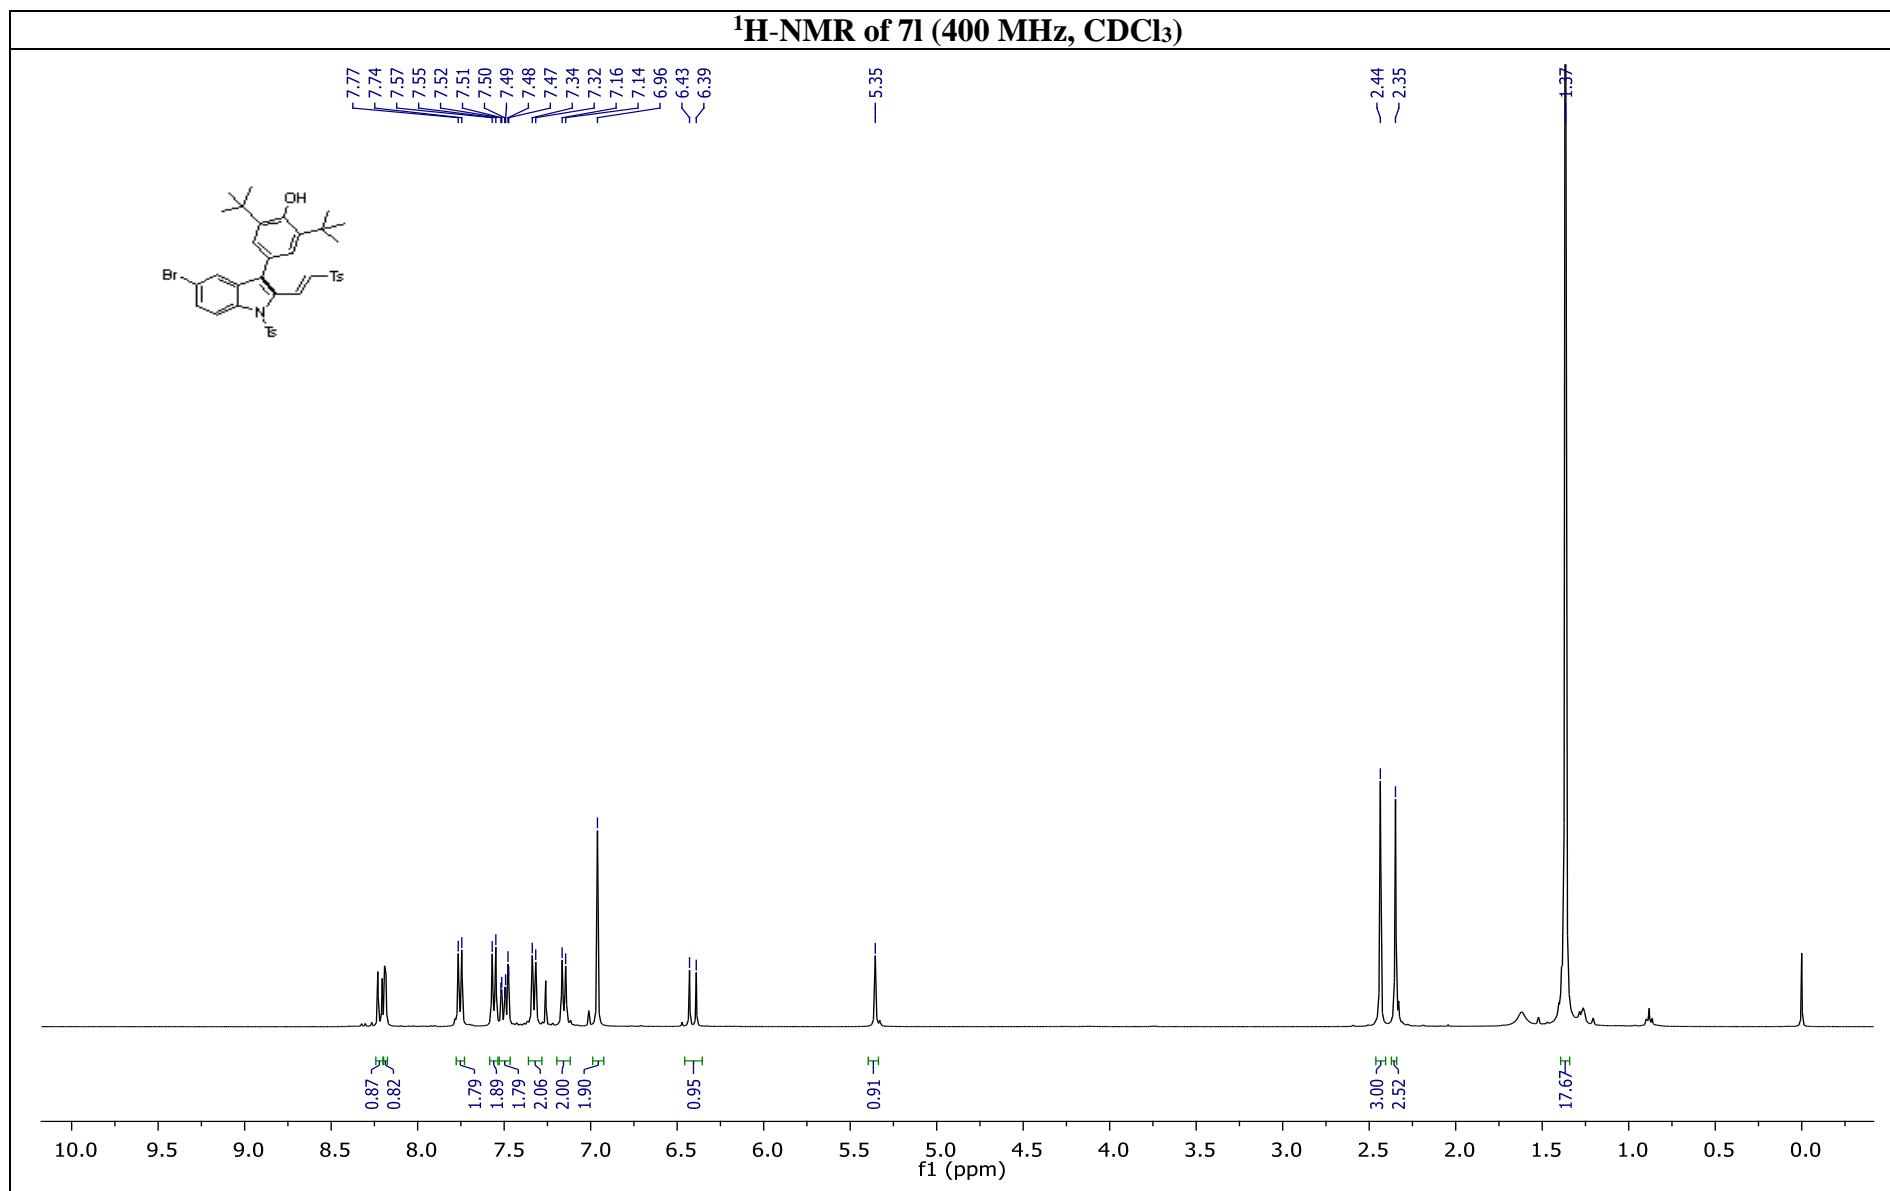

**$^{13}\text{C}\{^1\text{H}\}$ NMR of 7l (101 MHz,  $\text{CDCl}_3$ )**

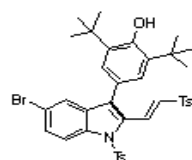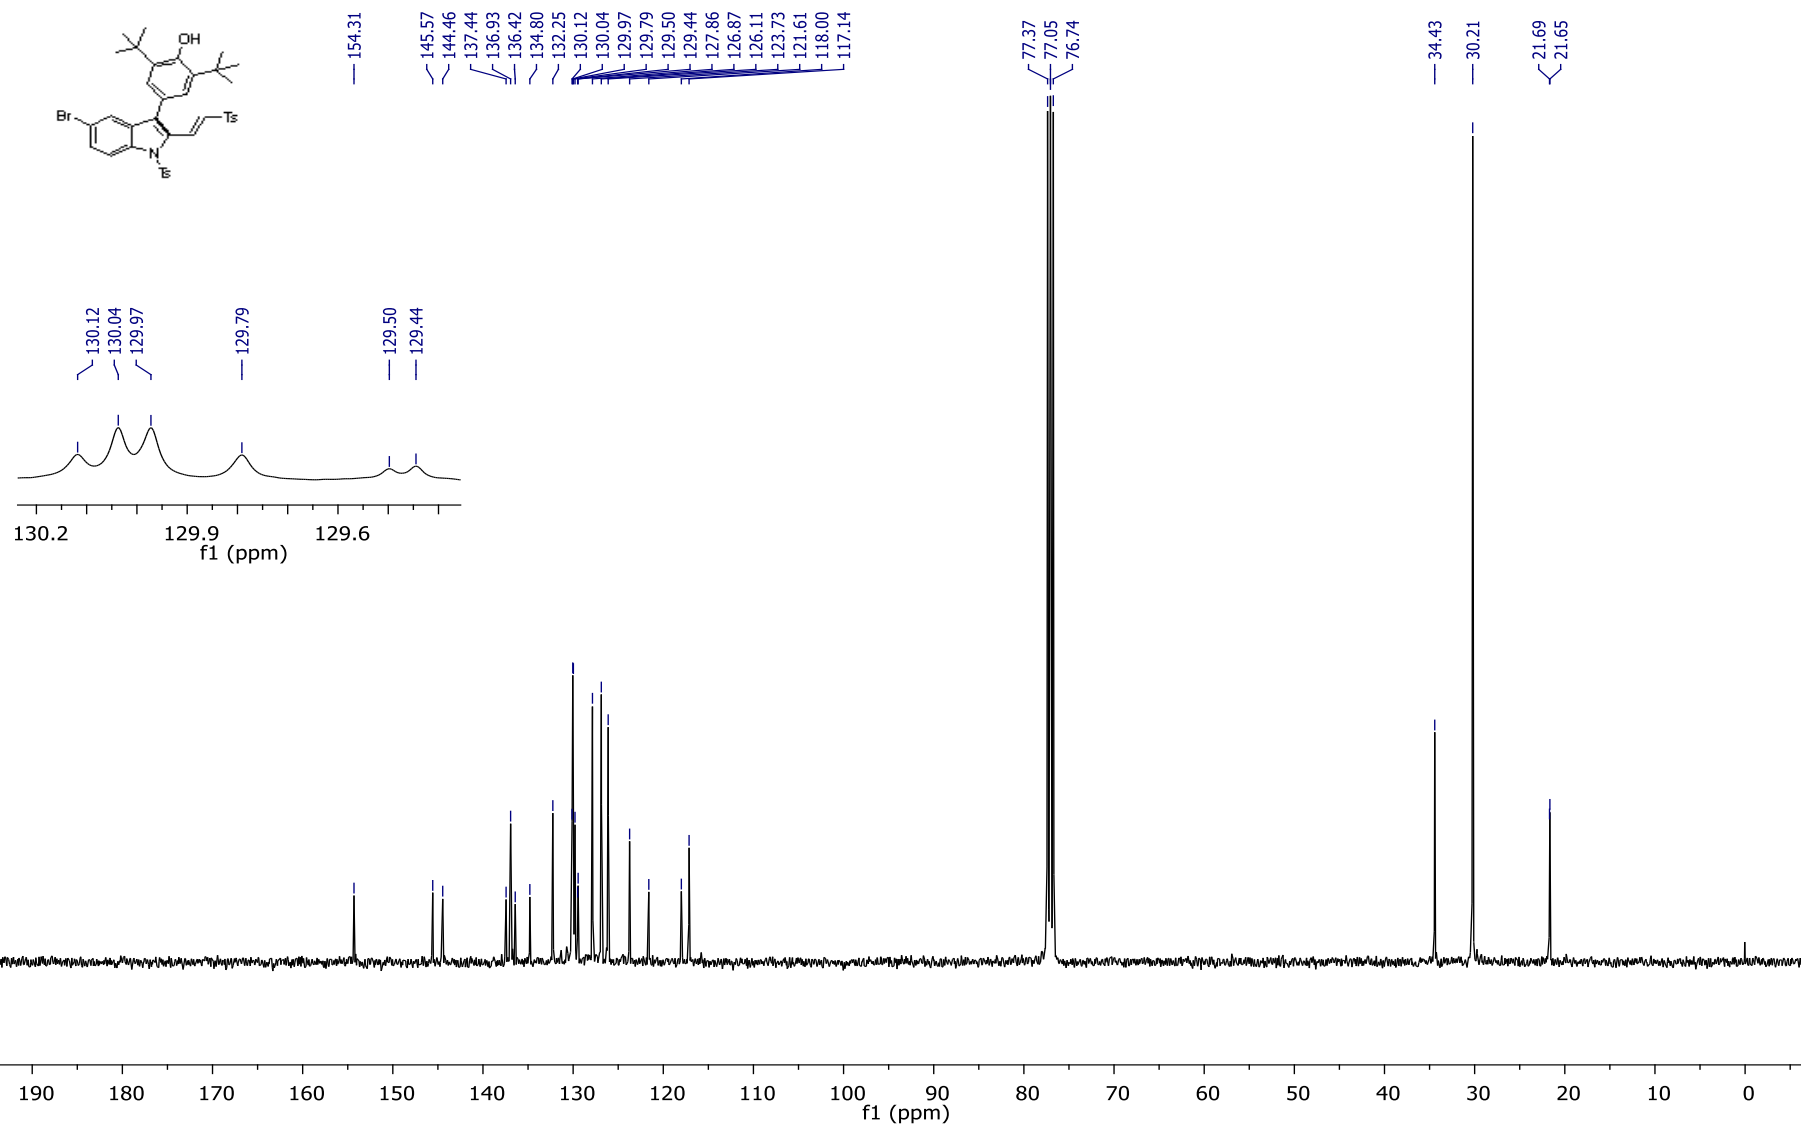

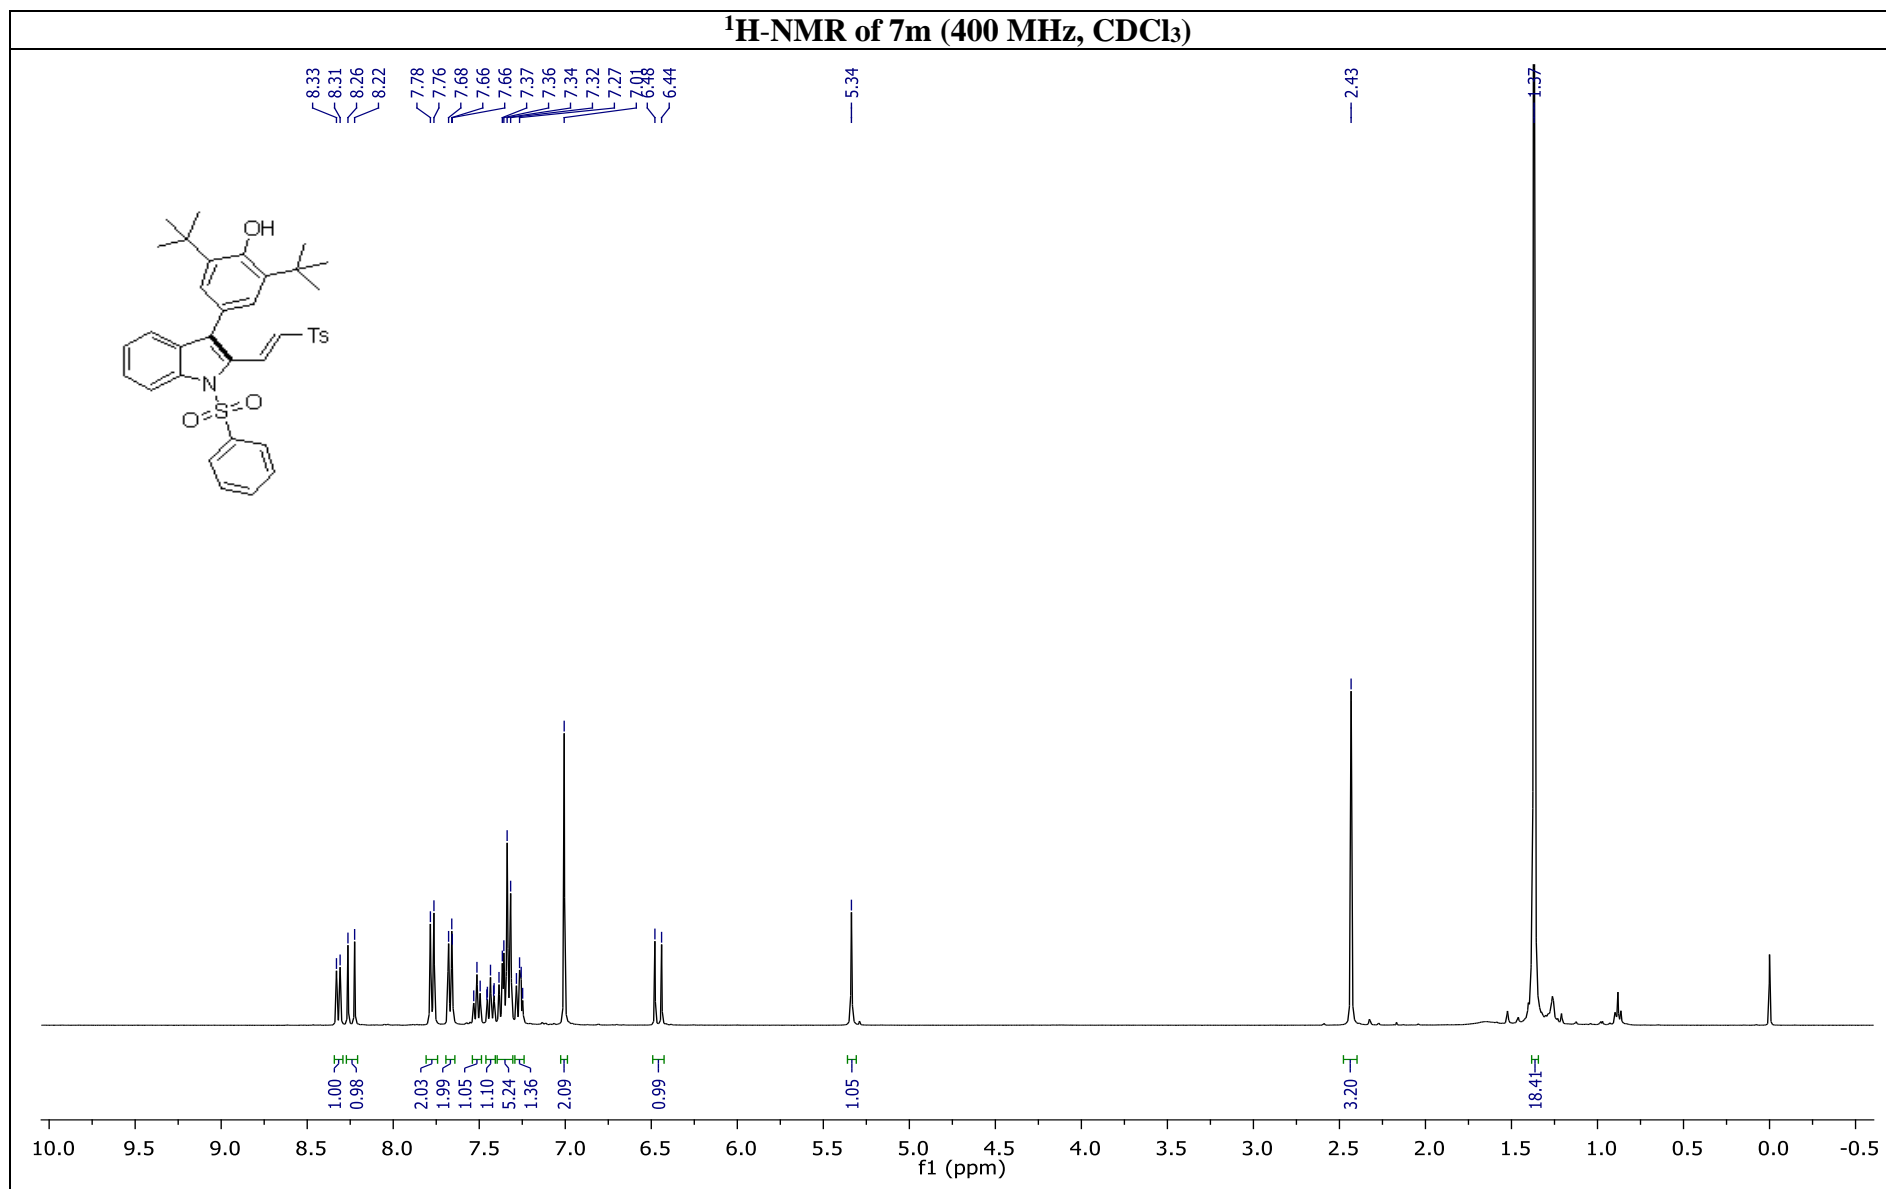

$^{13}\text{C}\{^1\text{H}\}$  NMR of 7m (101 MHz,  $\text{CDCl}_3$ )

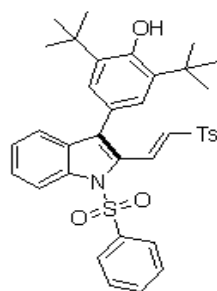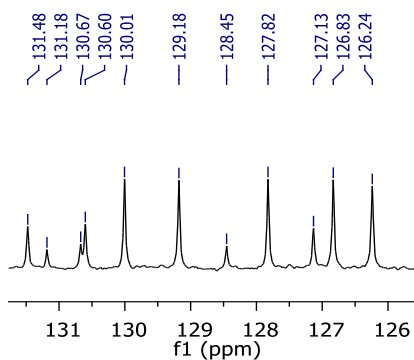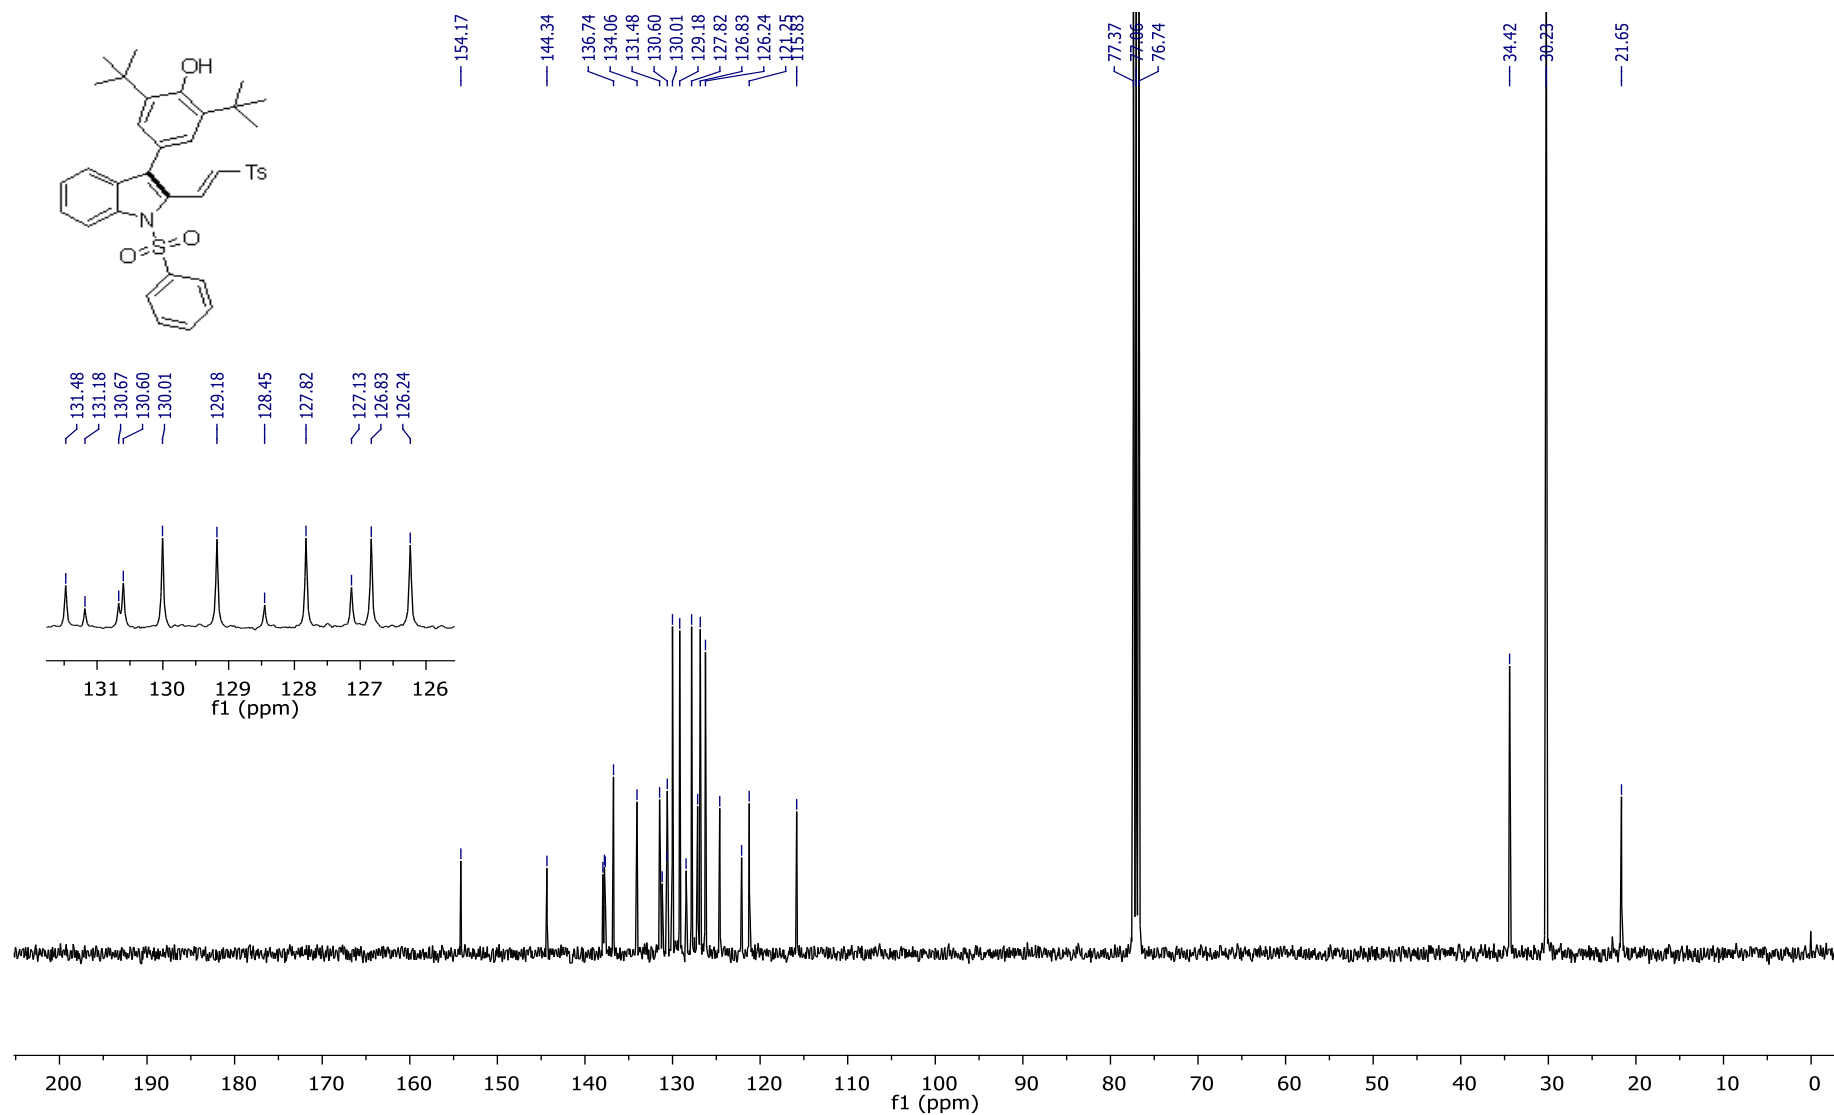

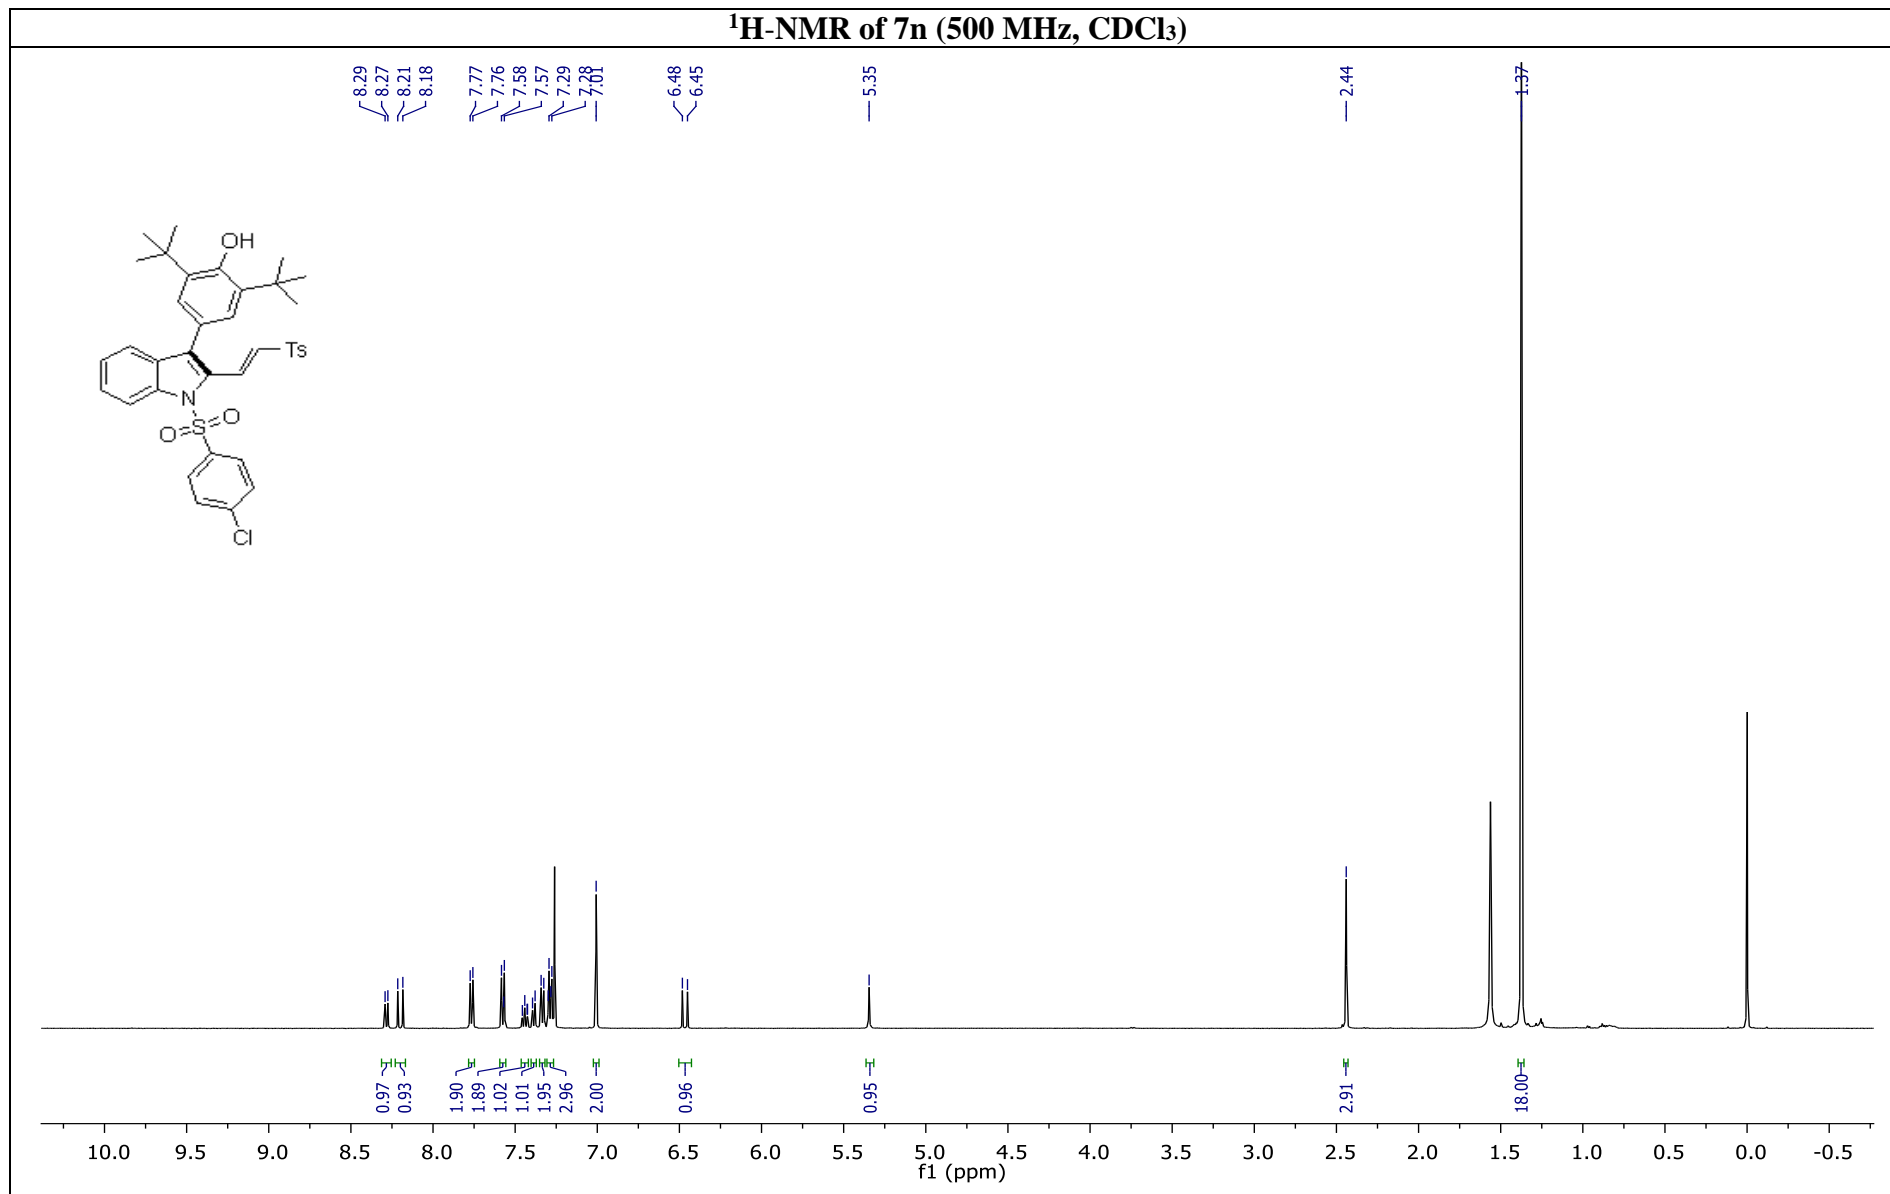

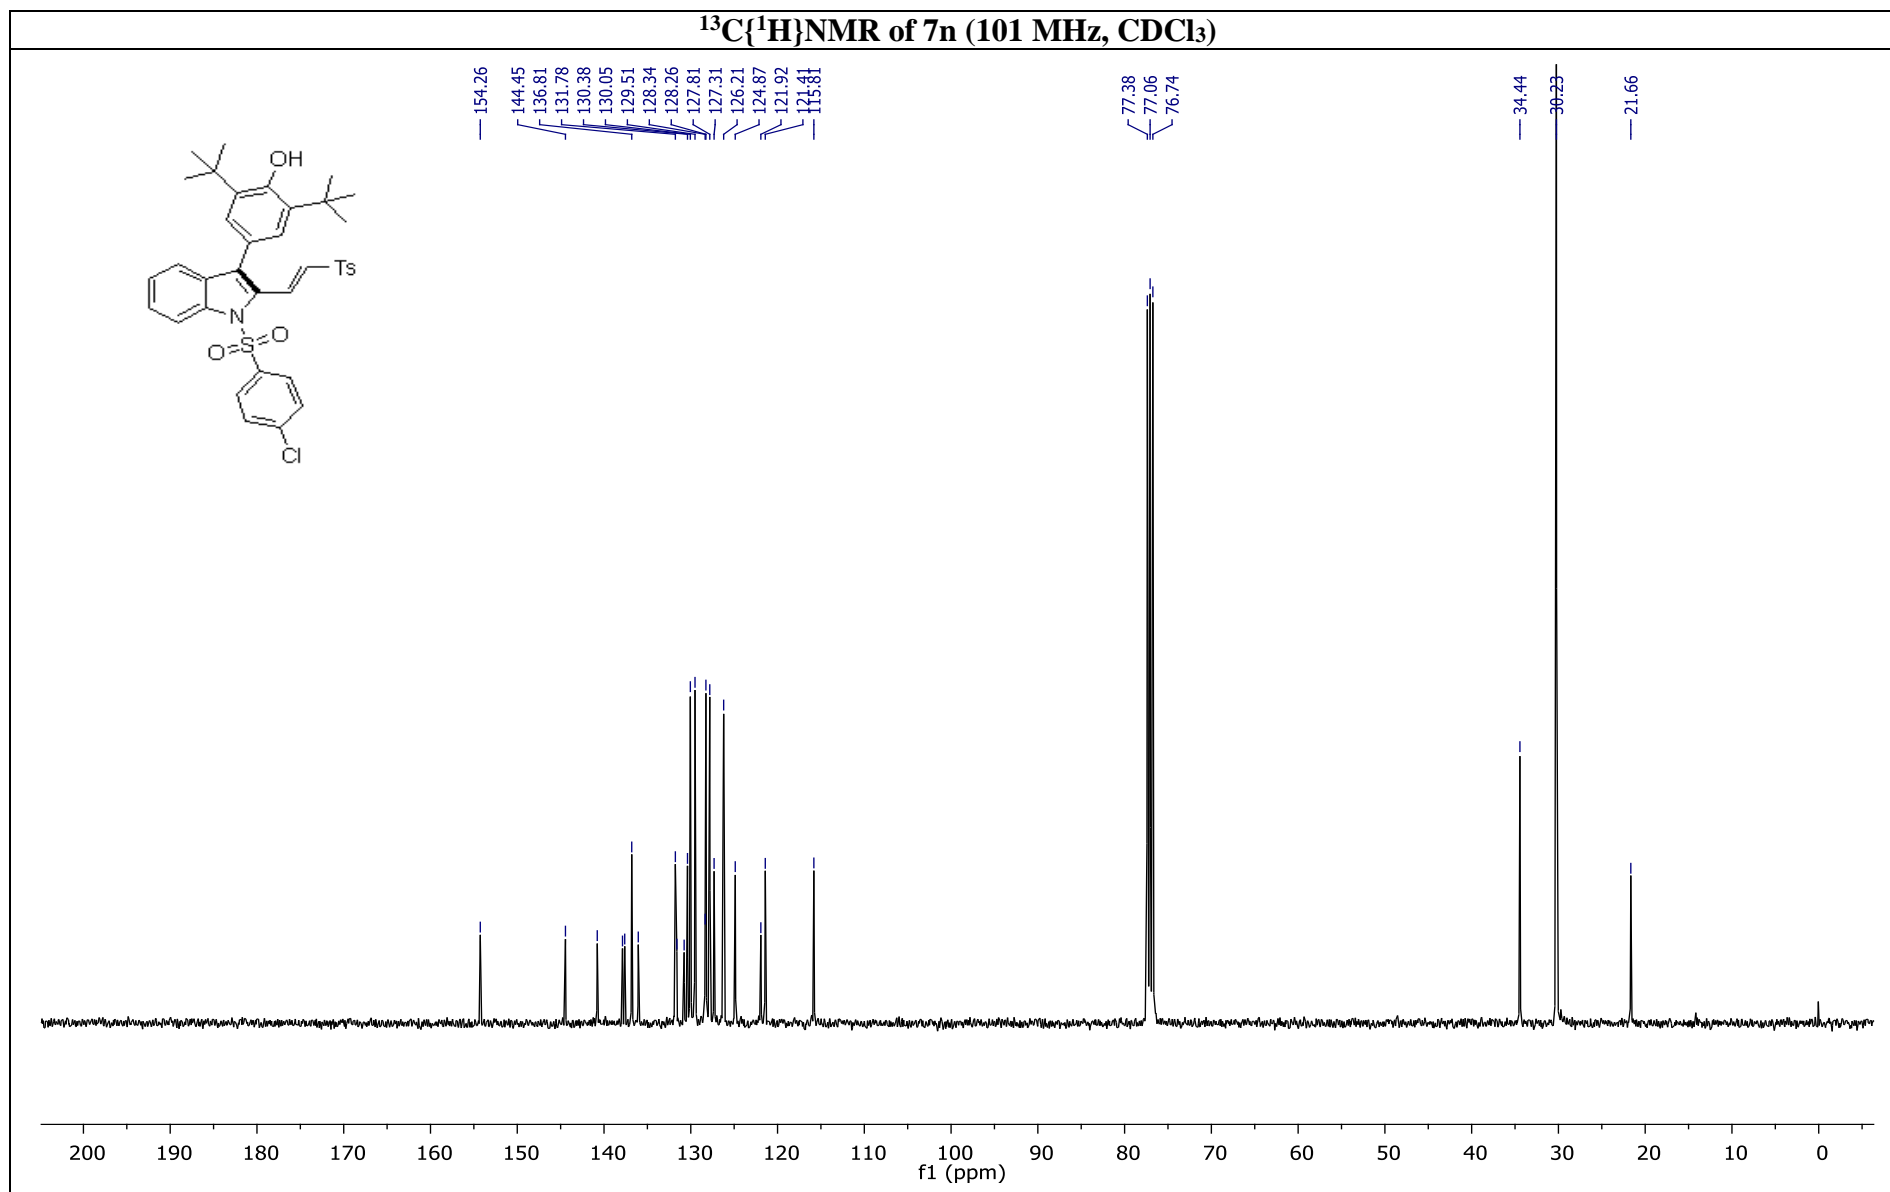

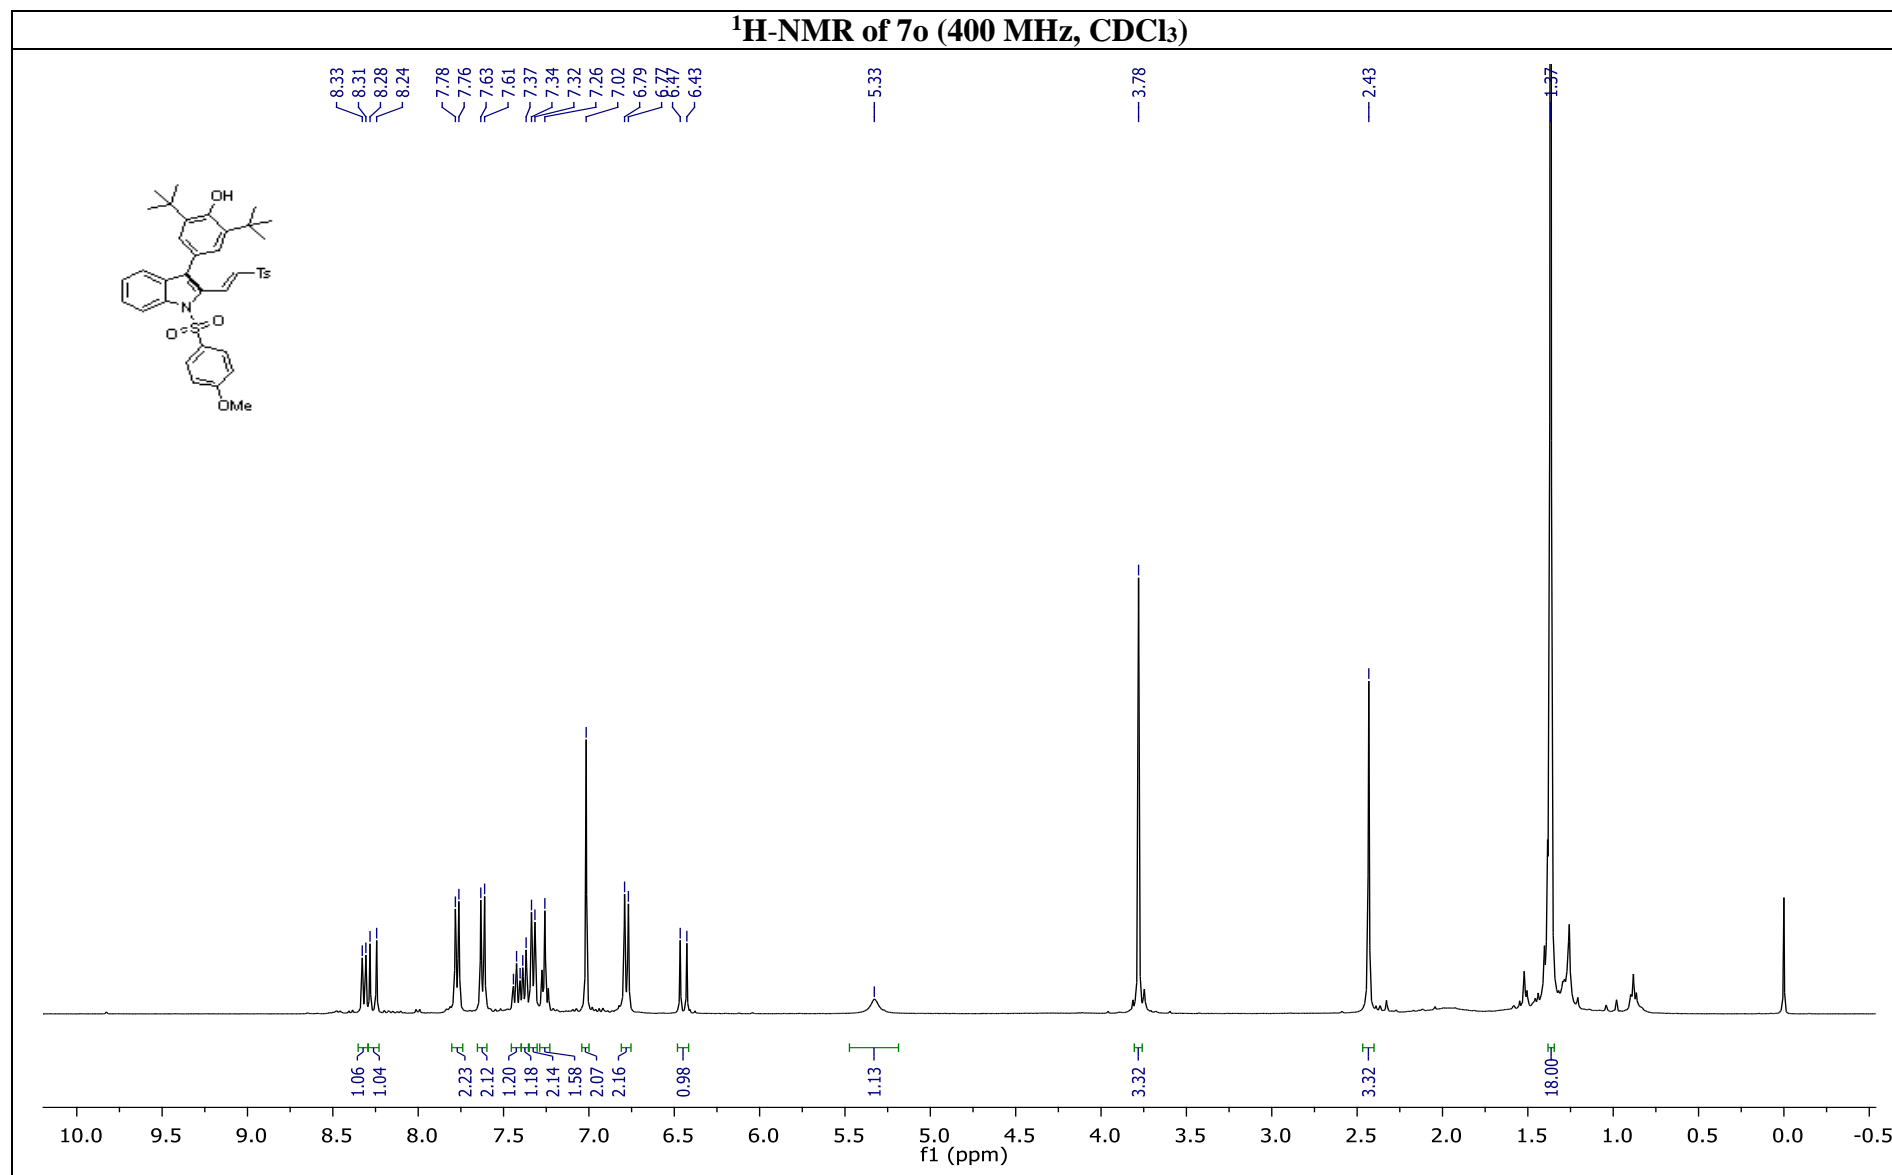

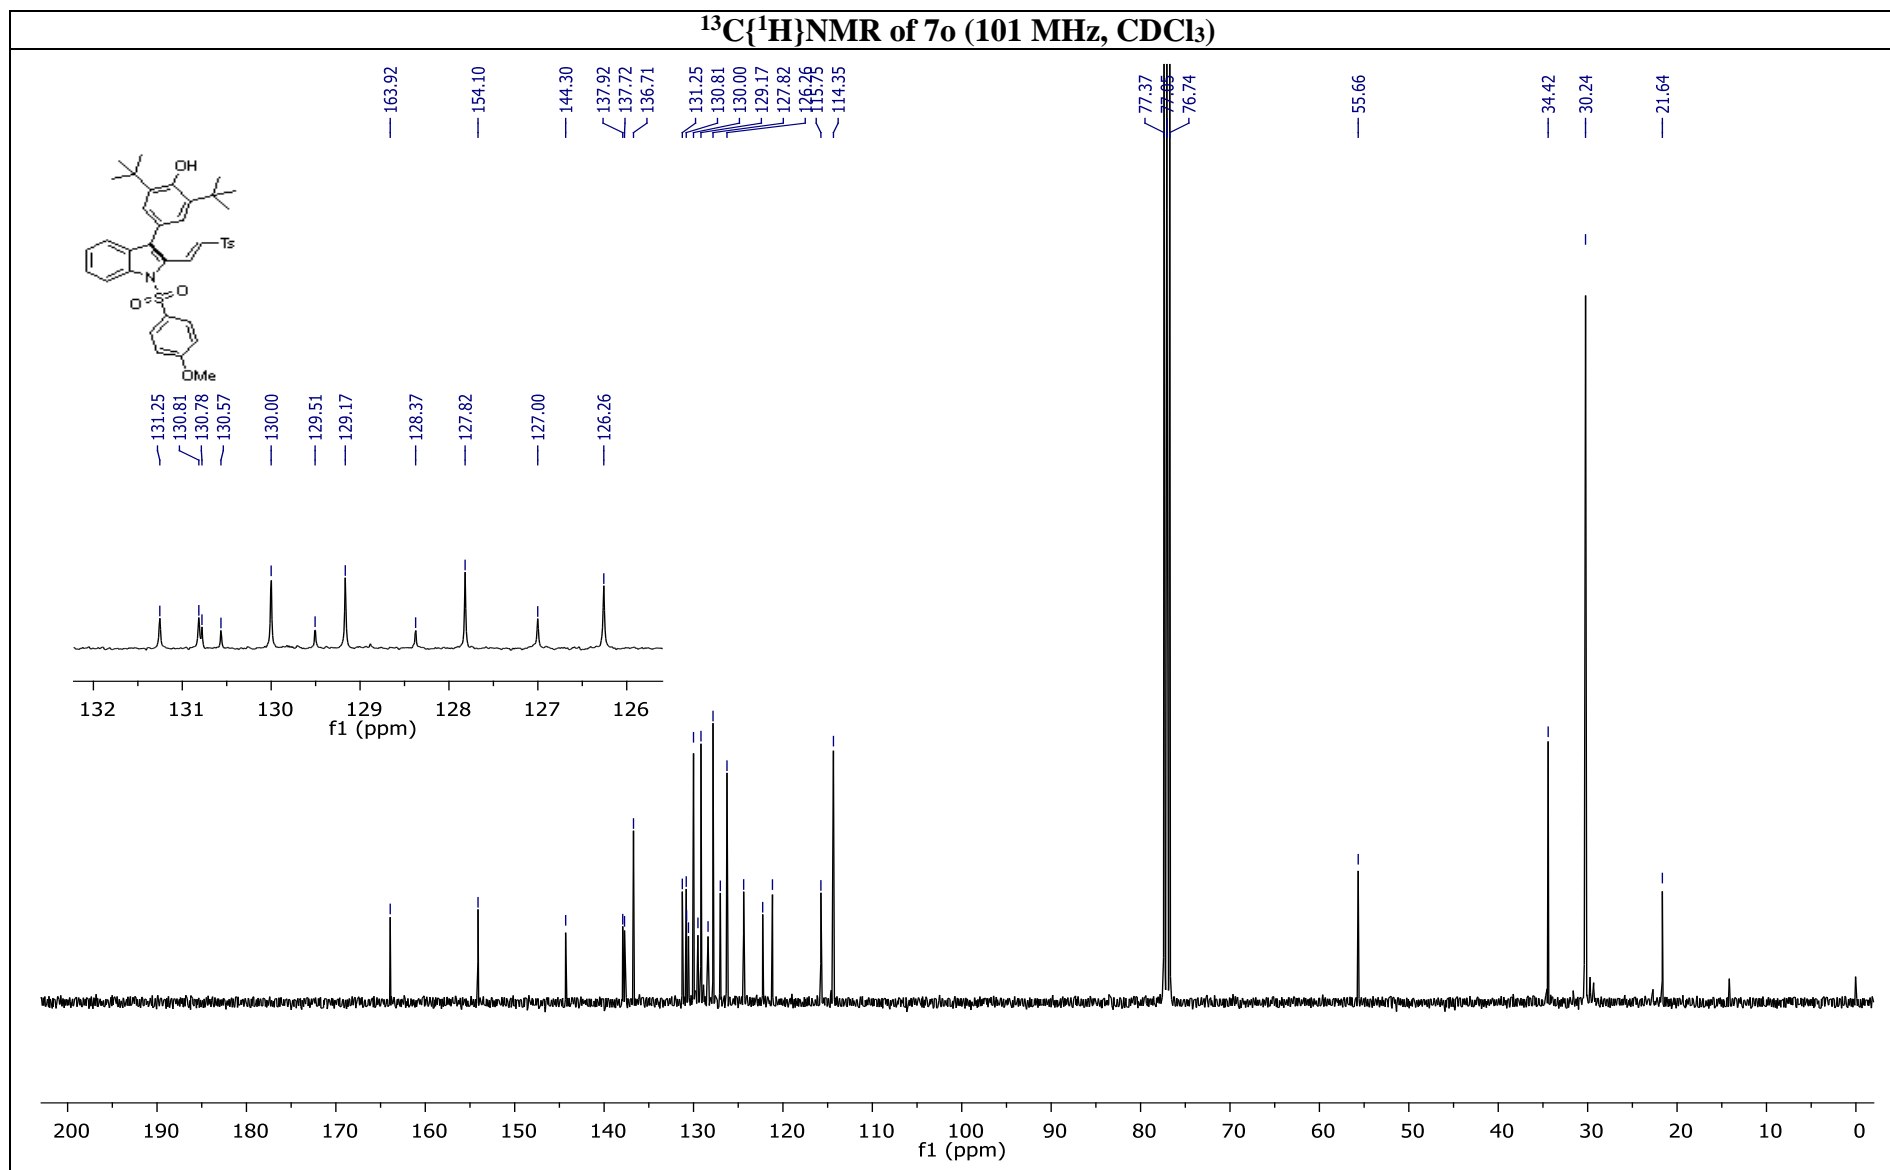

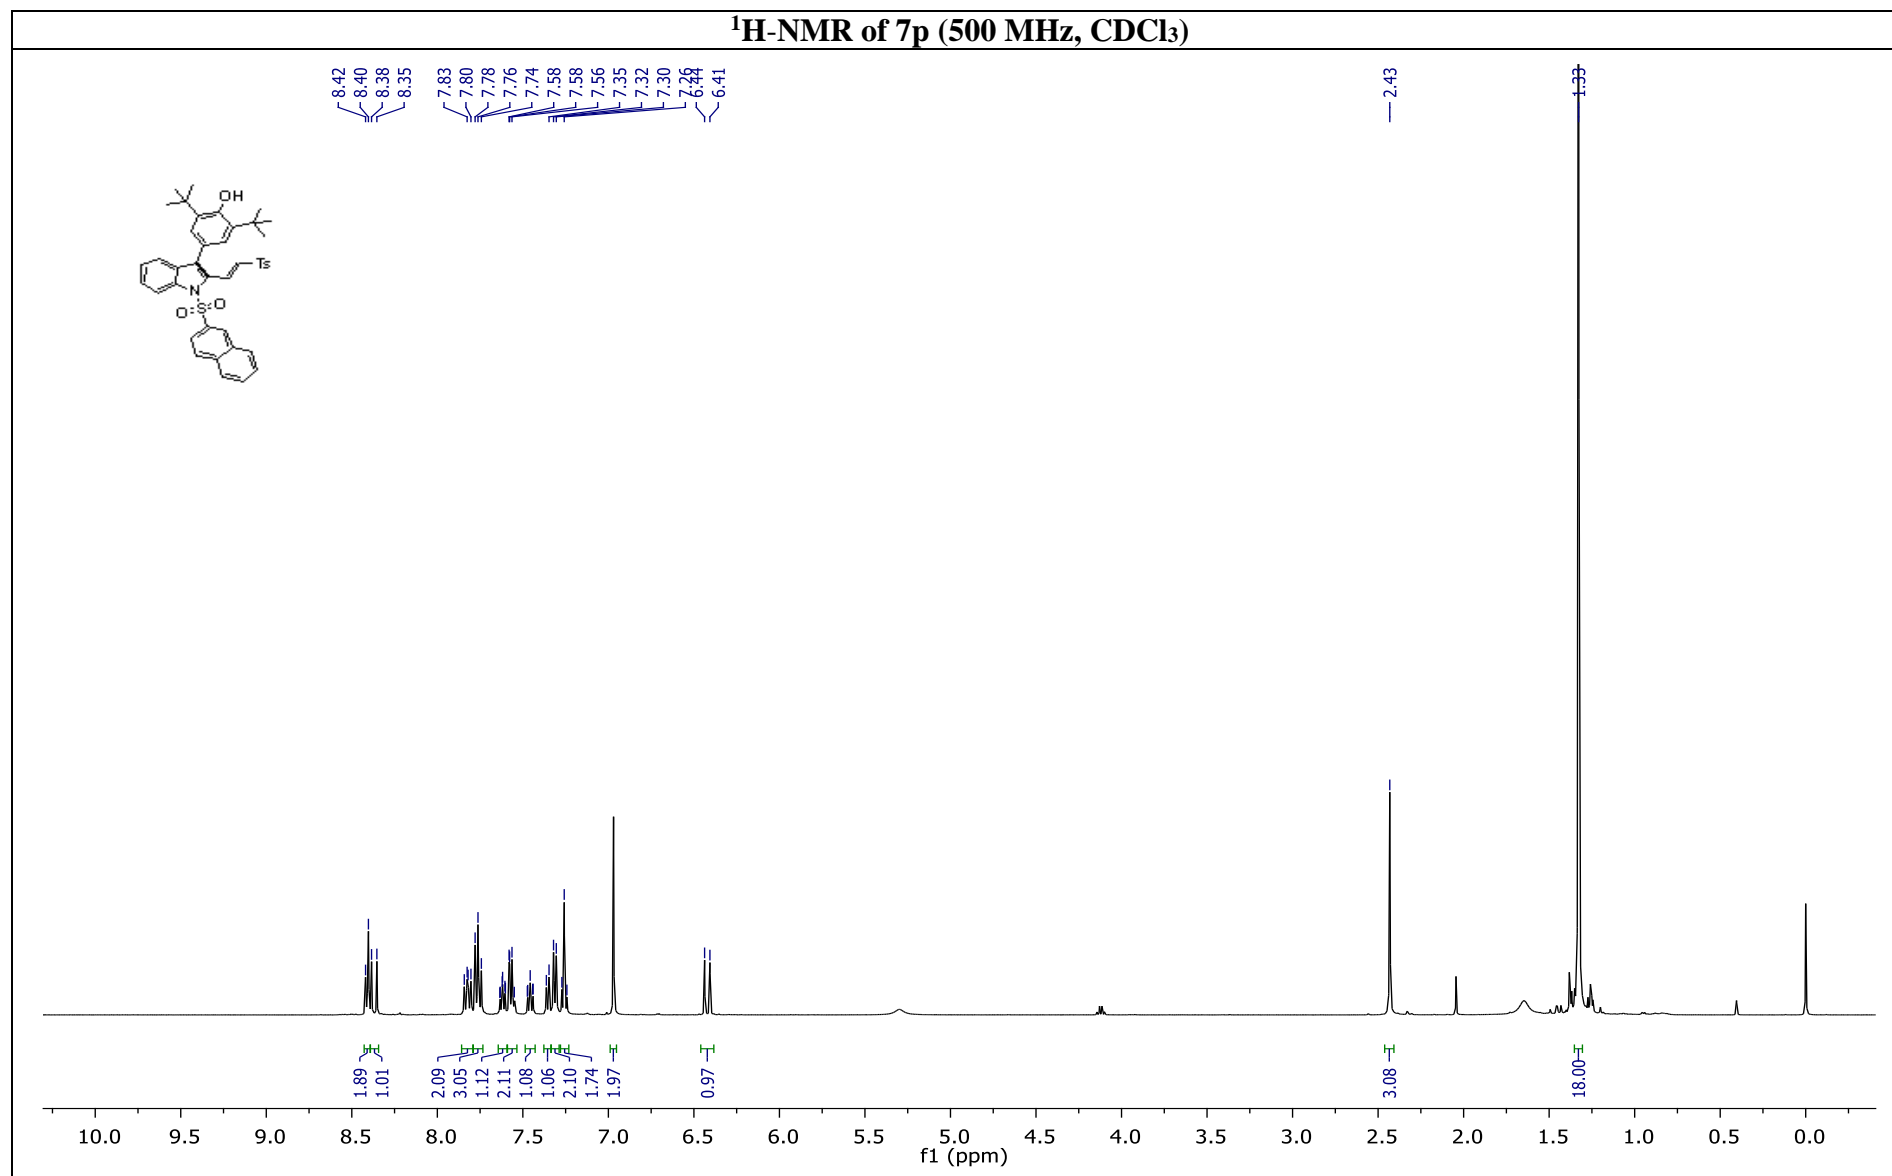

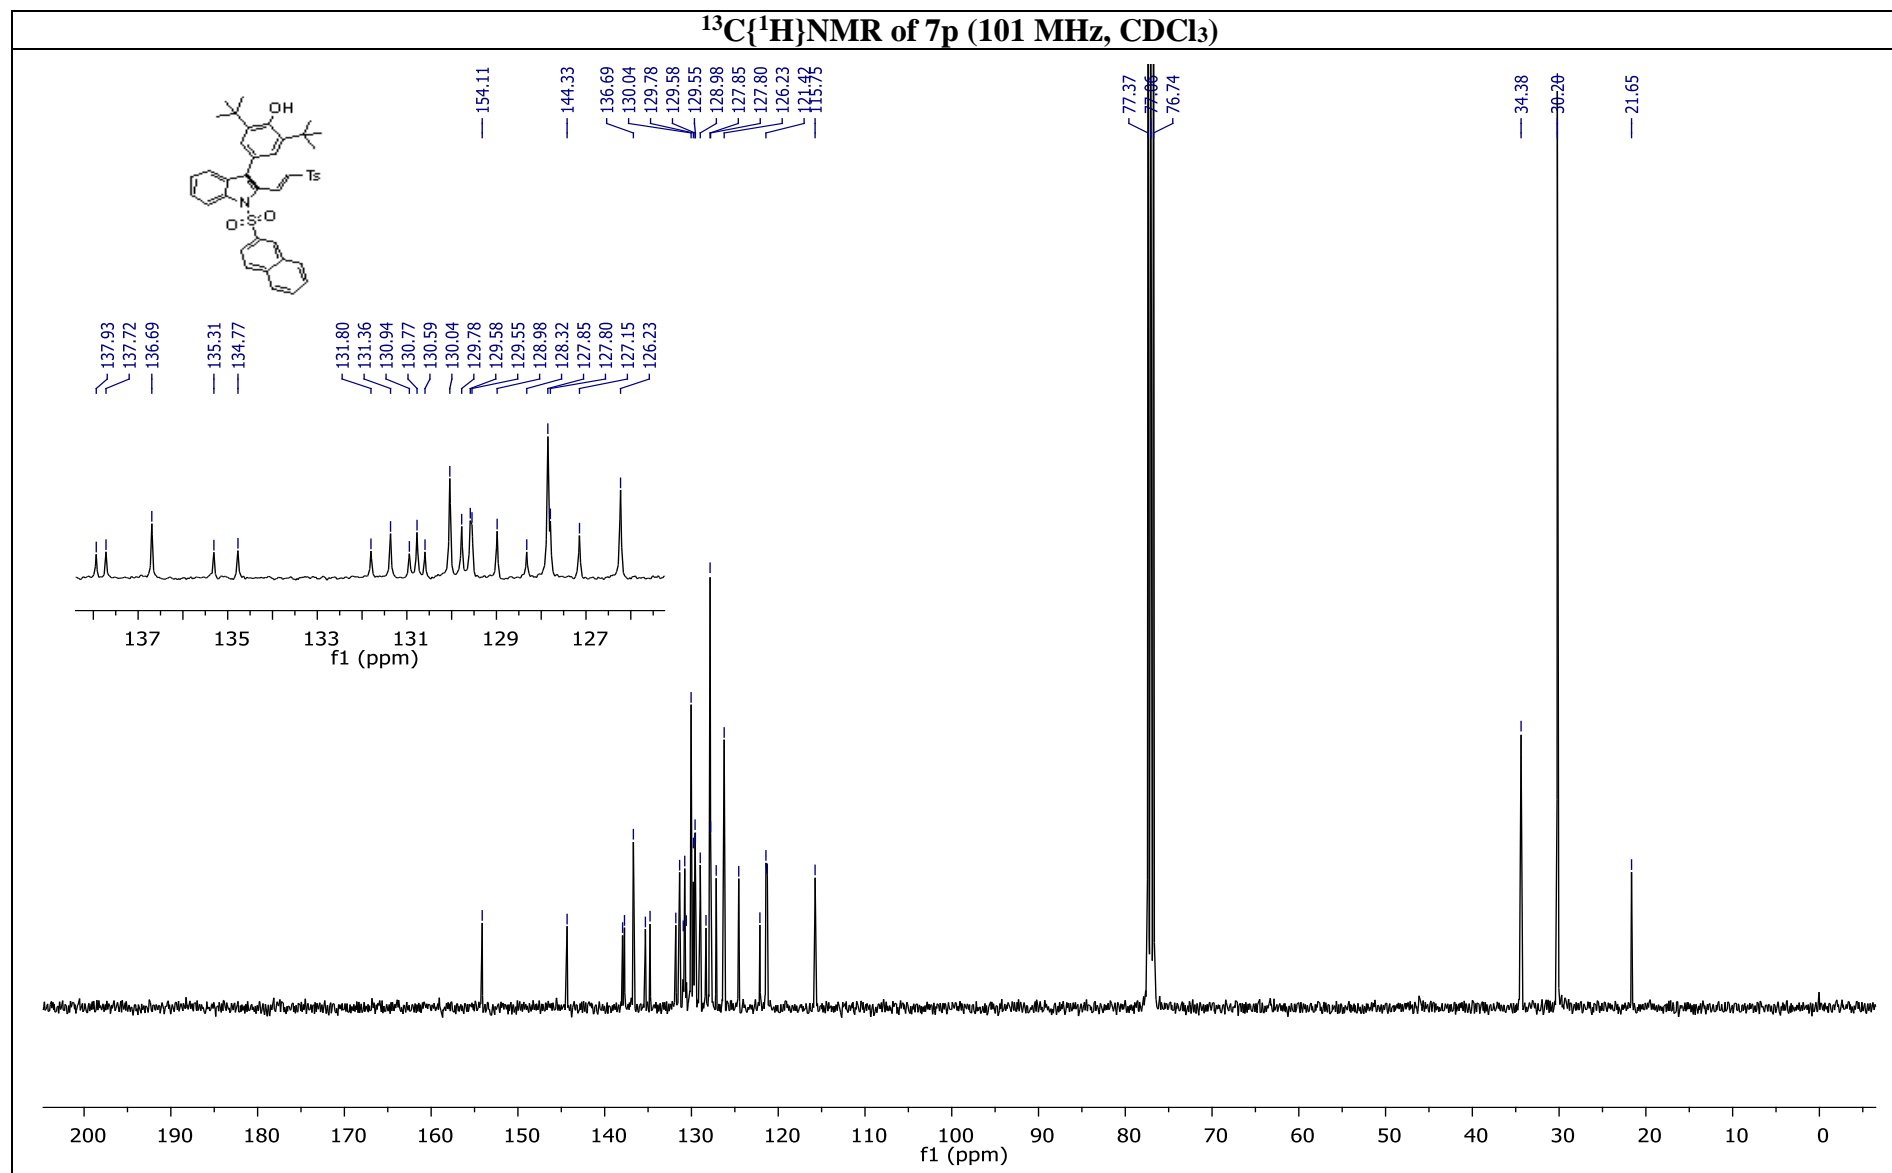

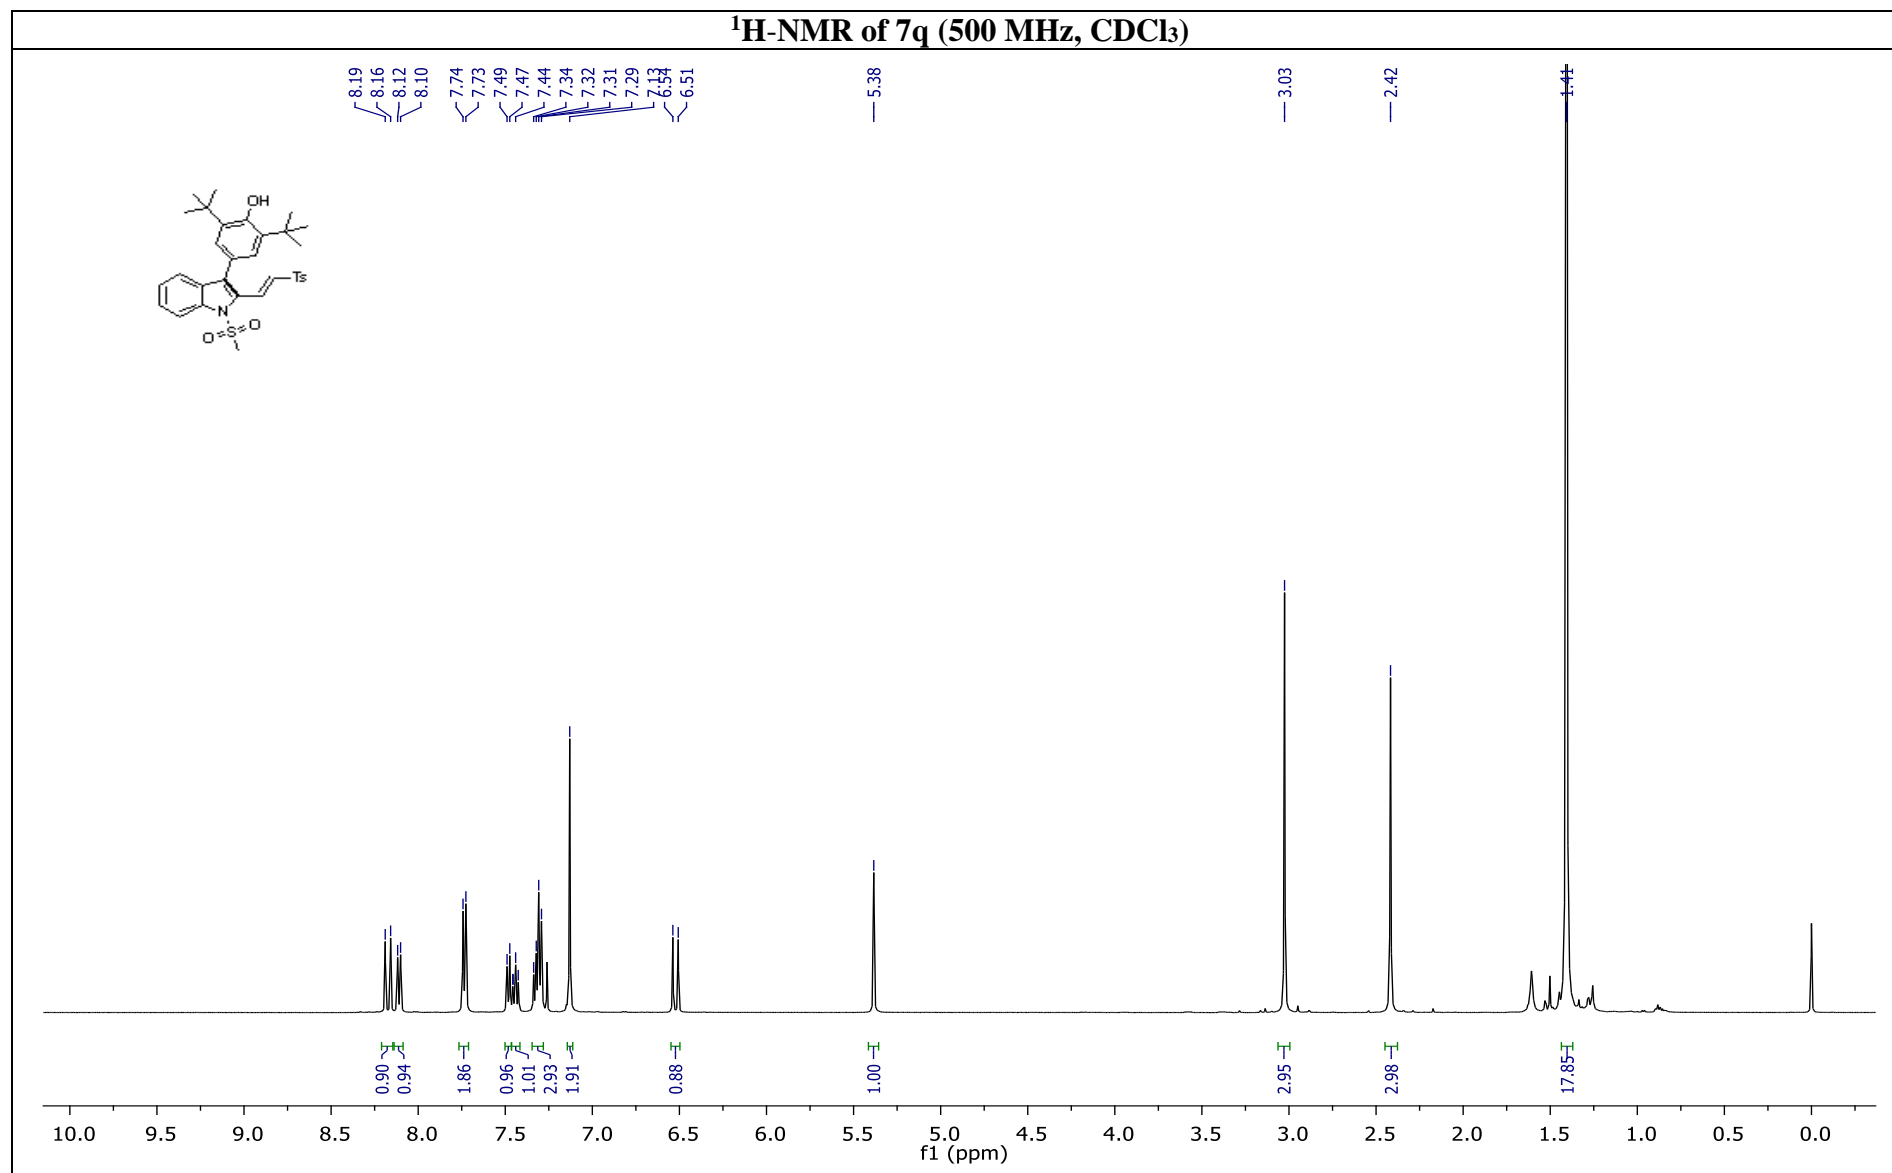

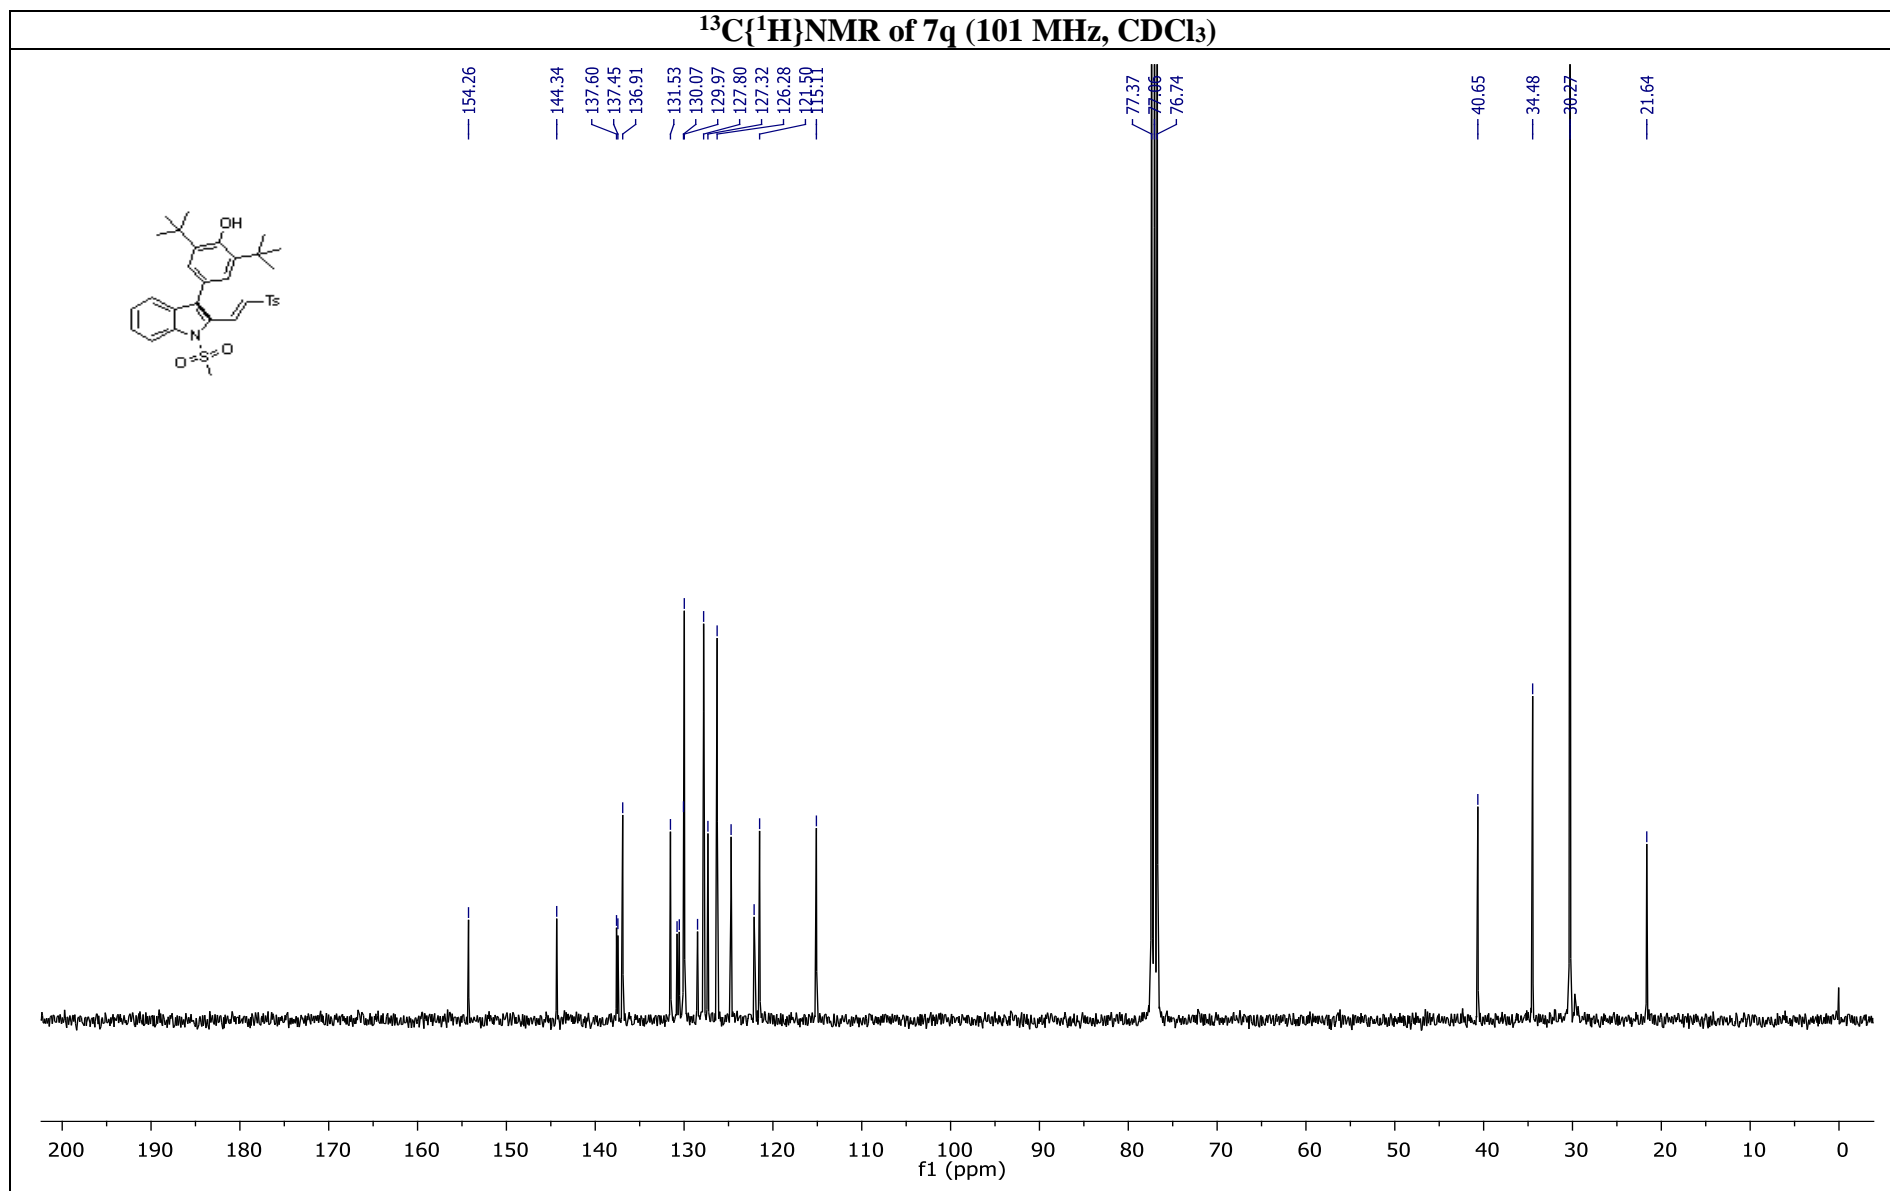

**<sup>1</sup>H-NMR of 8 (400 MHz, CDCl<sub>3</sub>)**

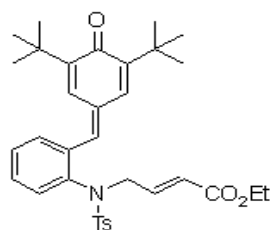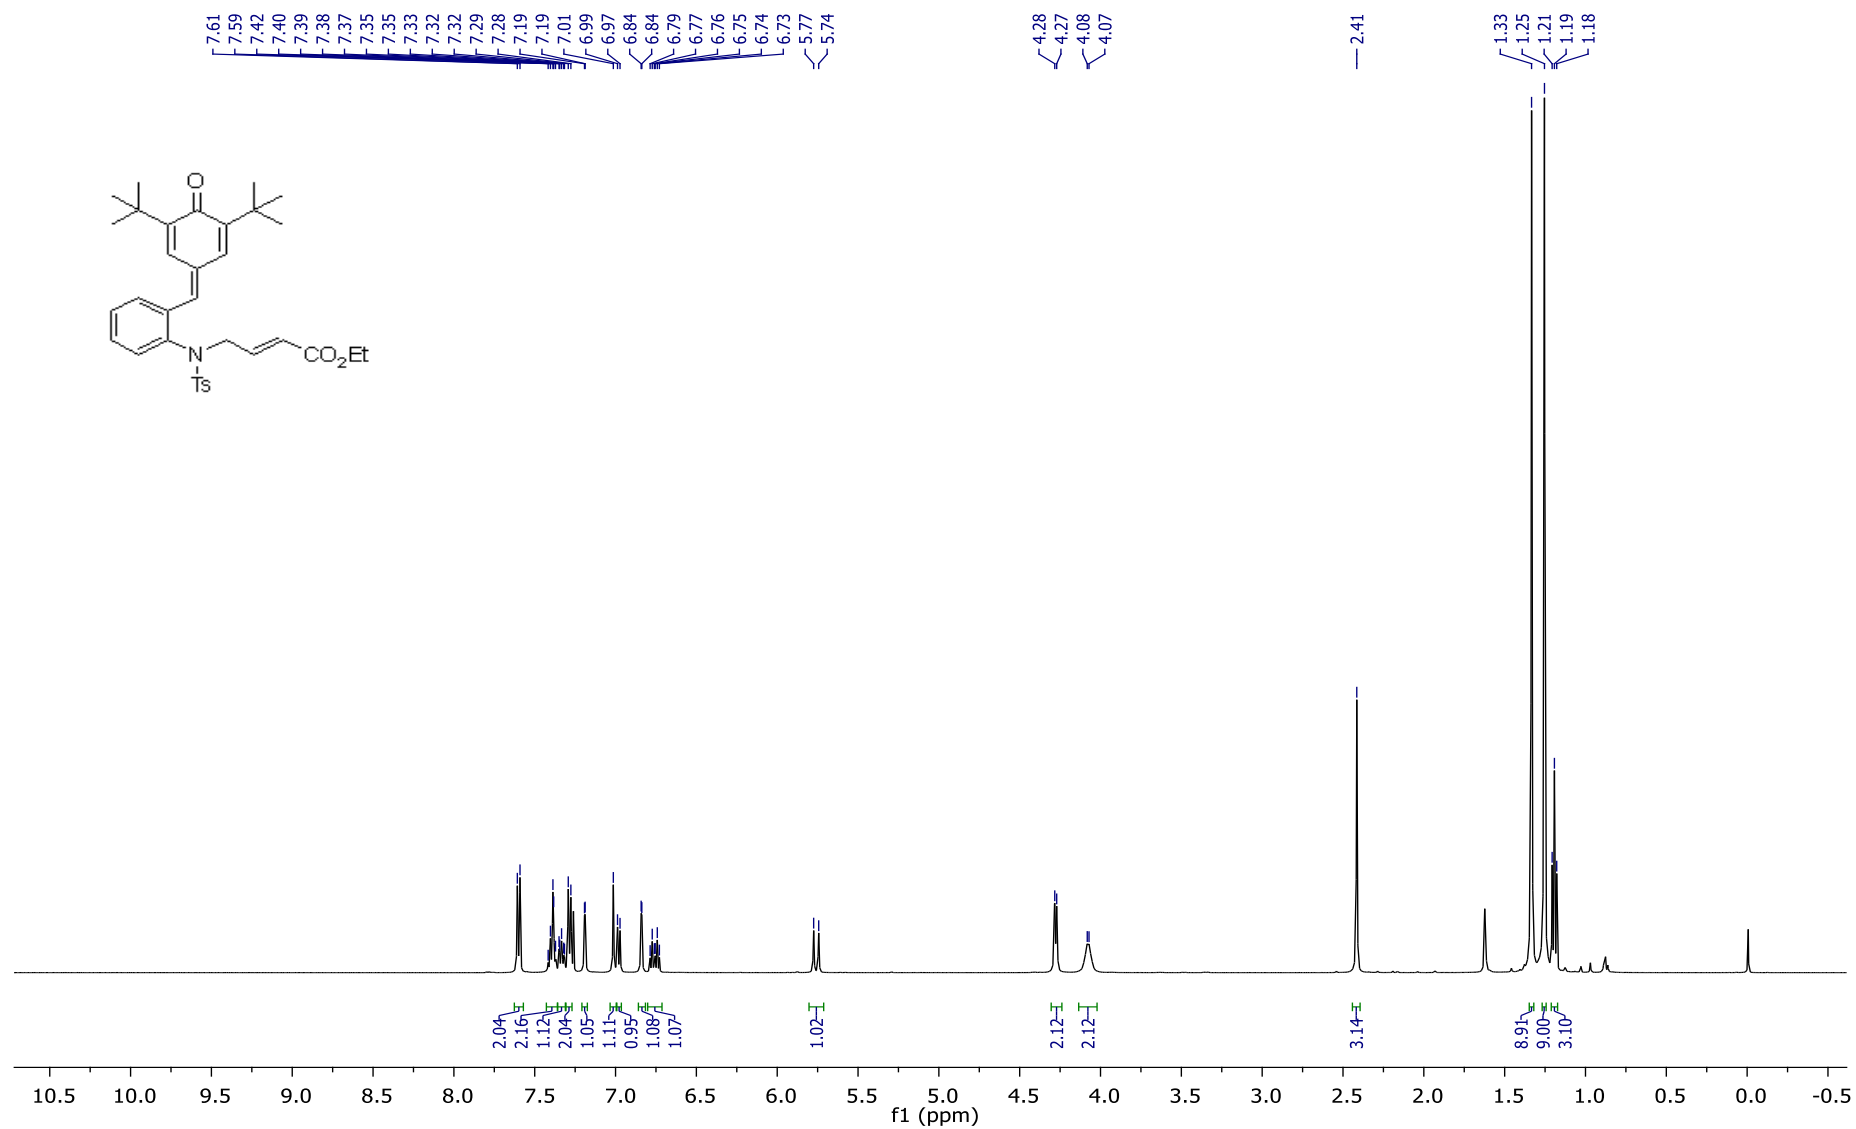

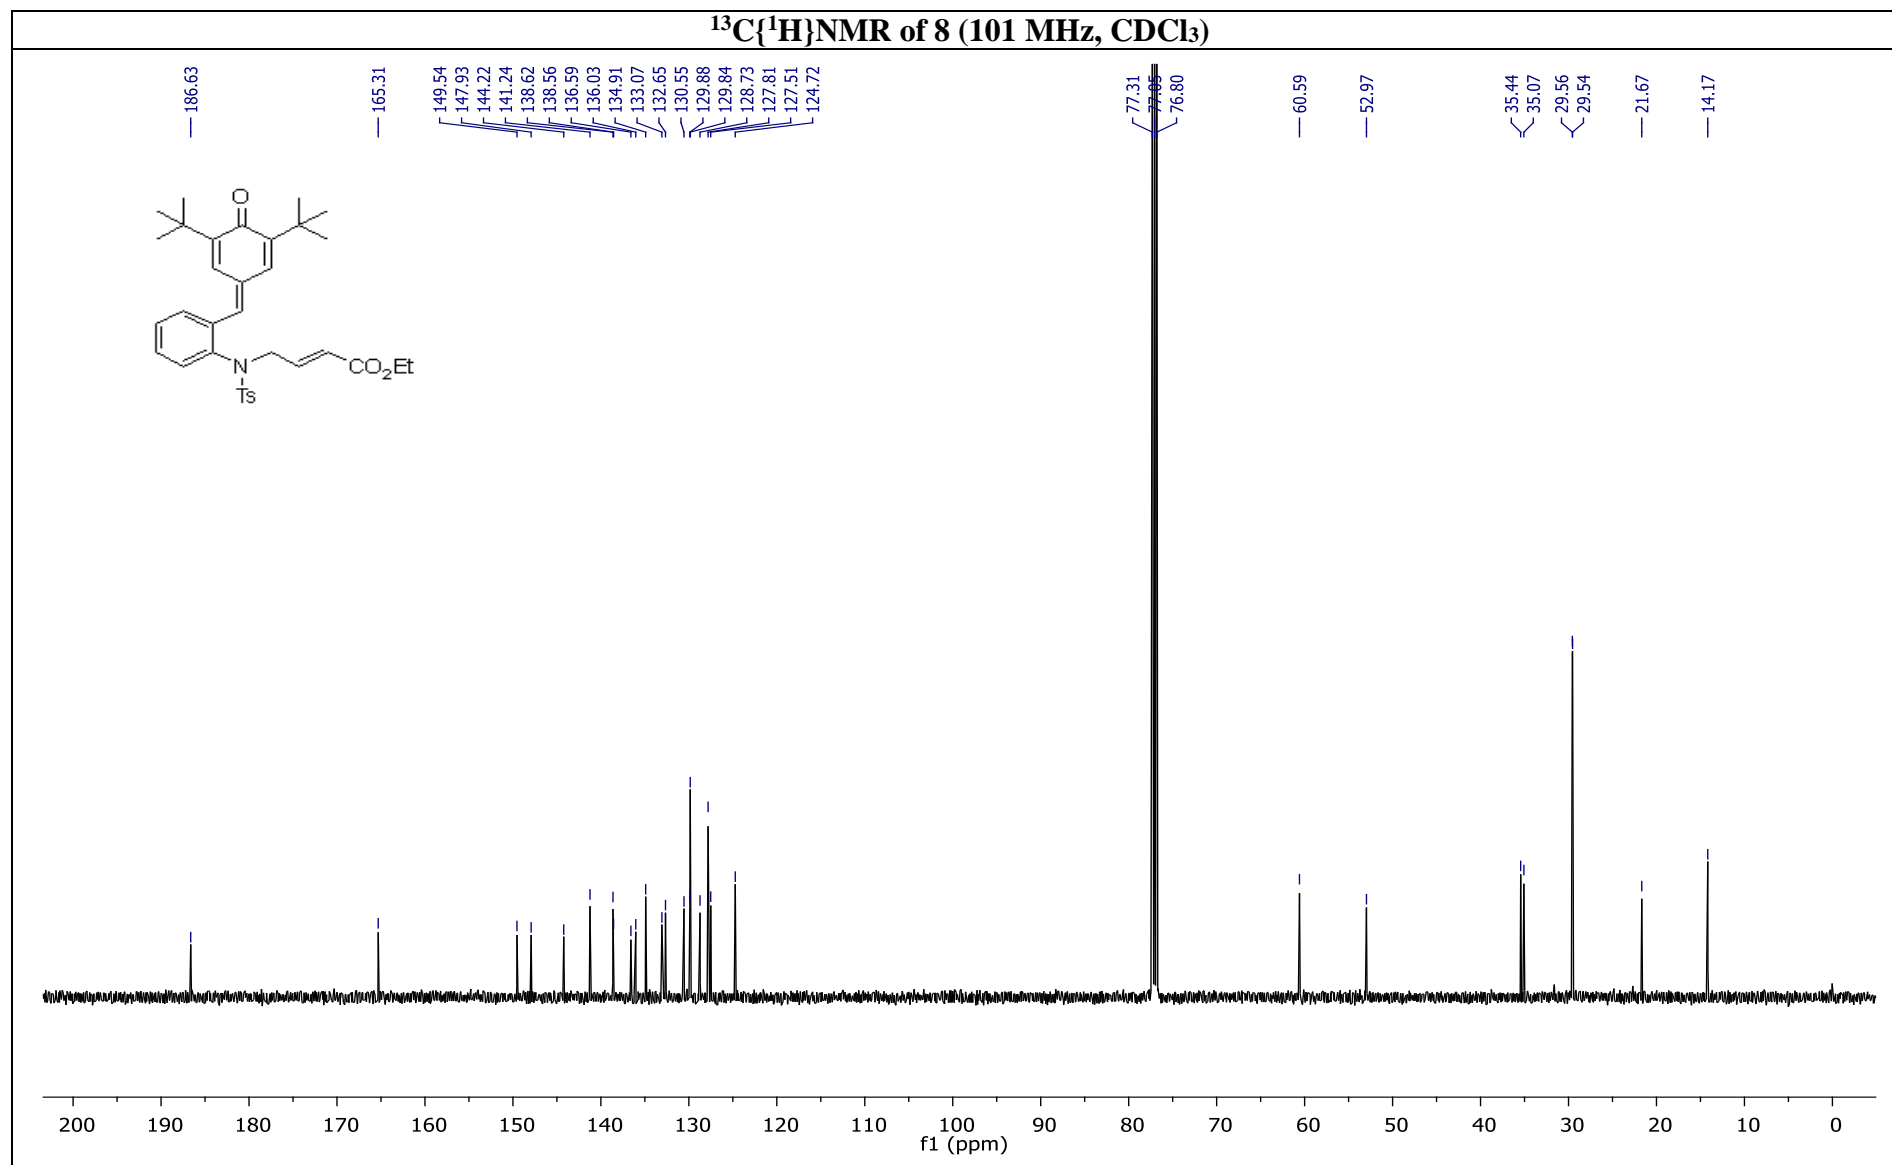

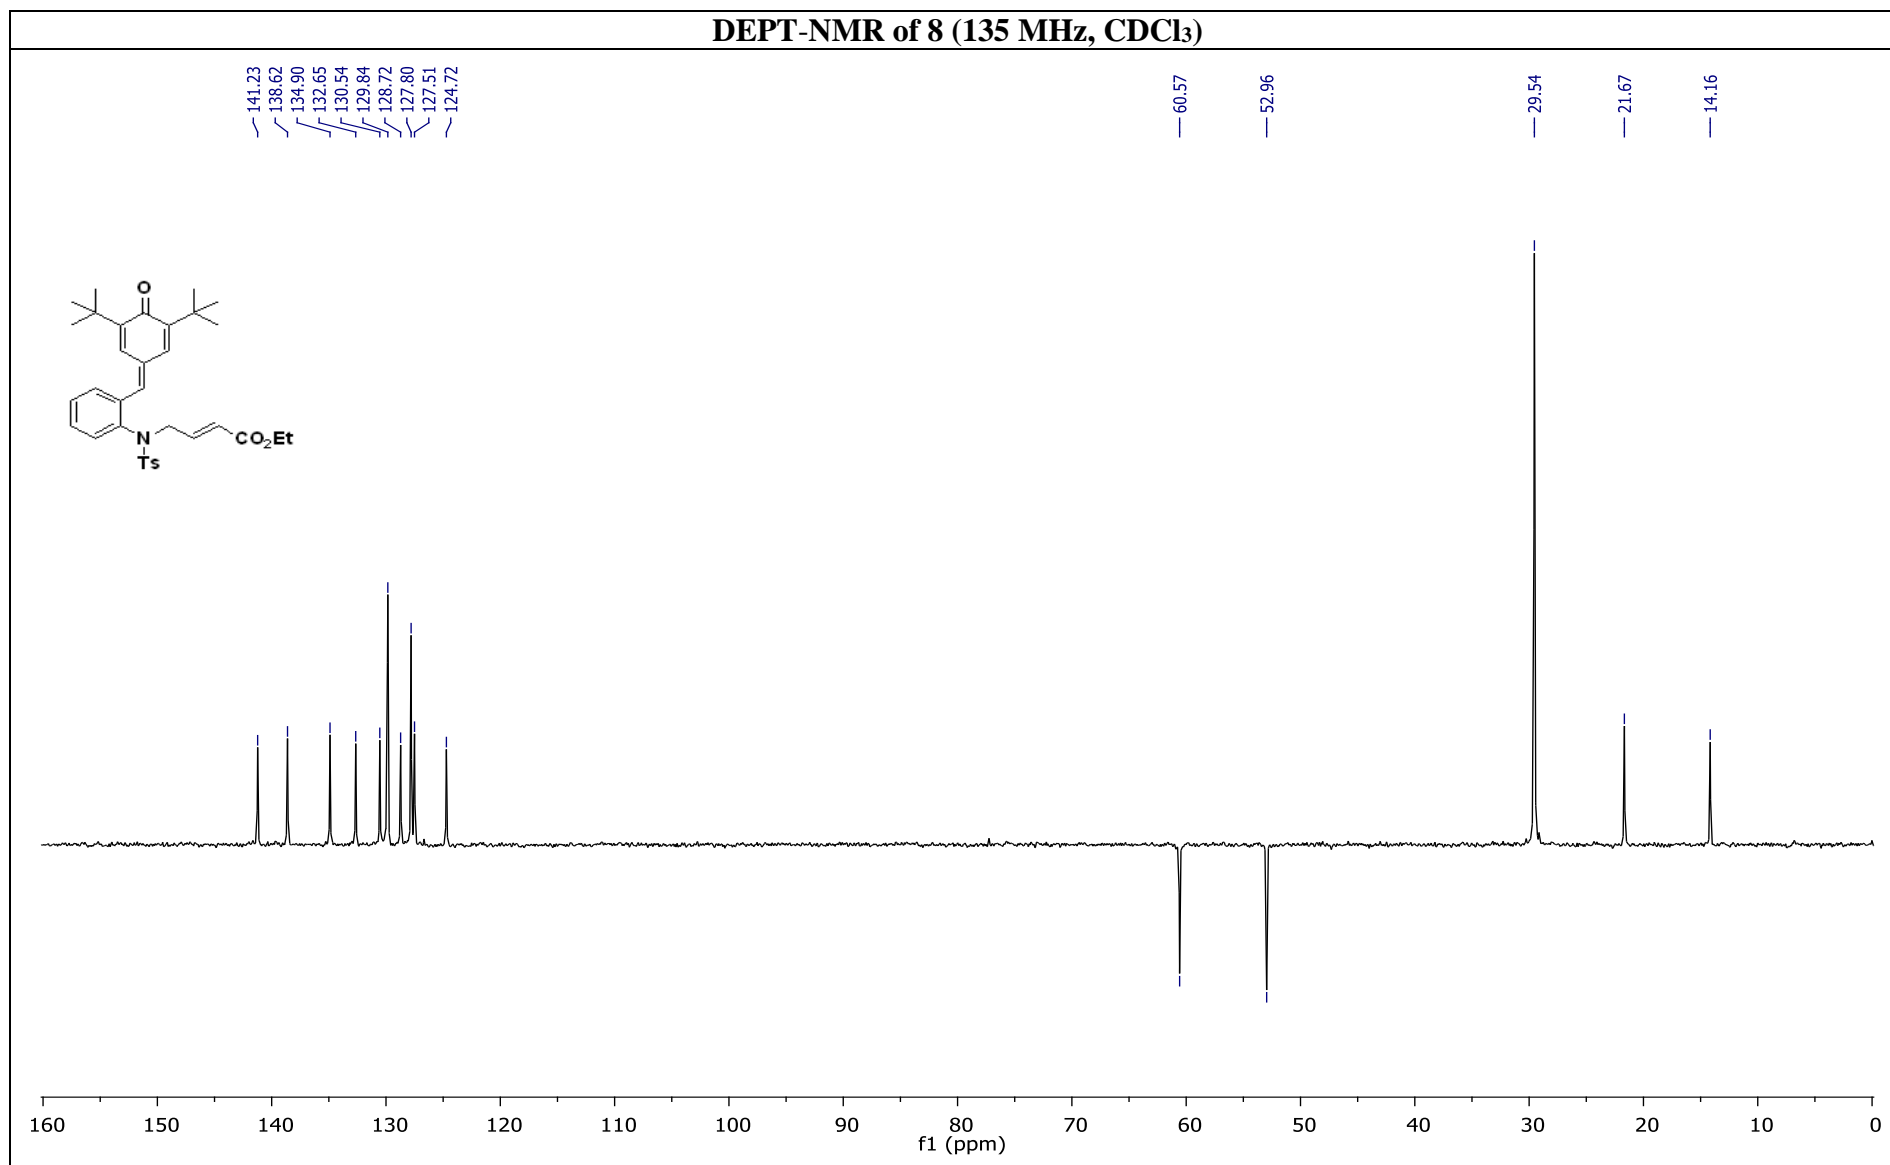

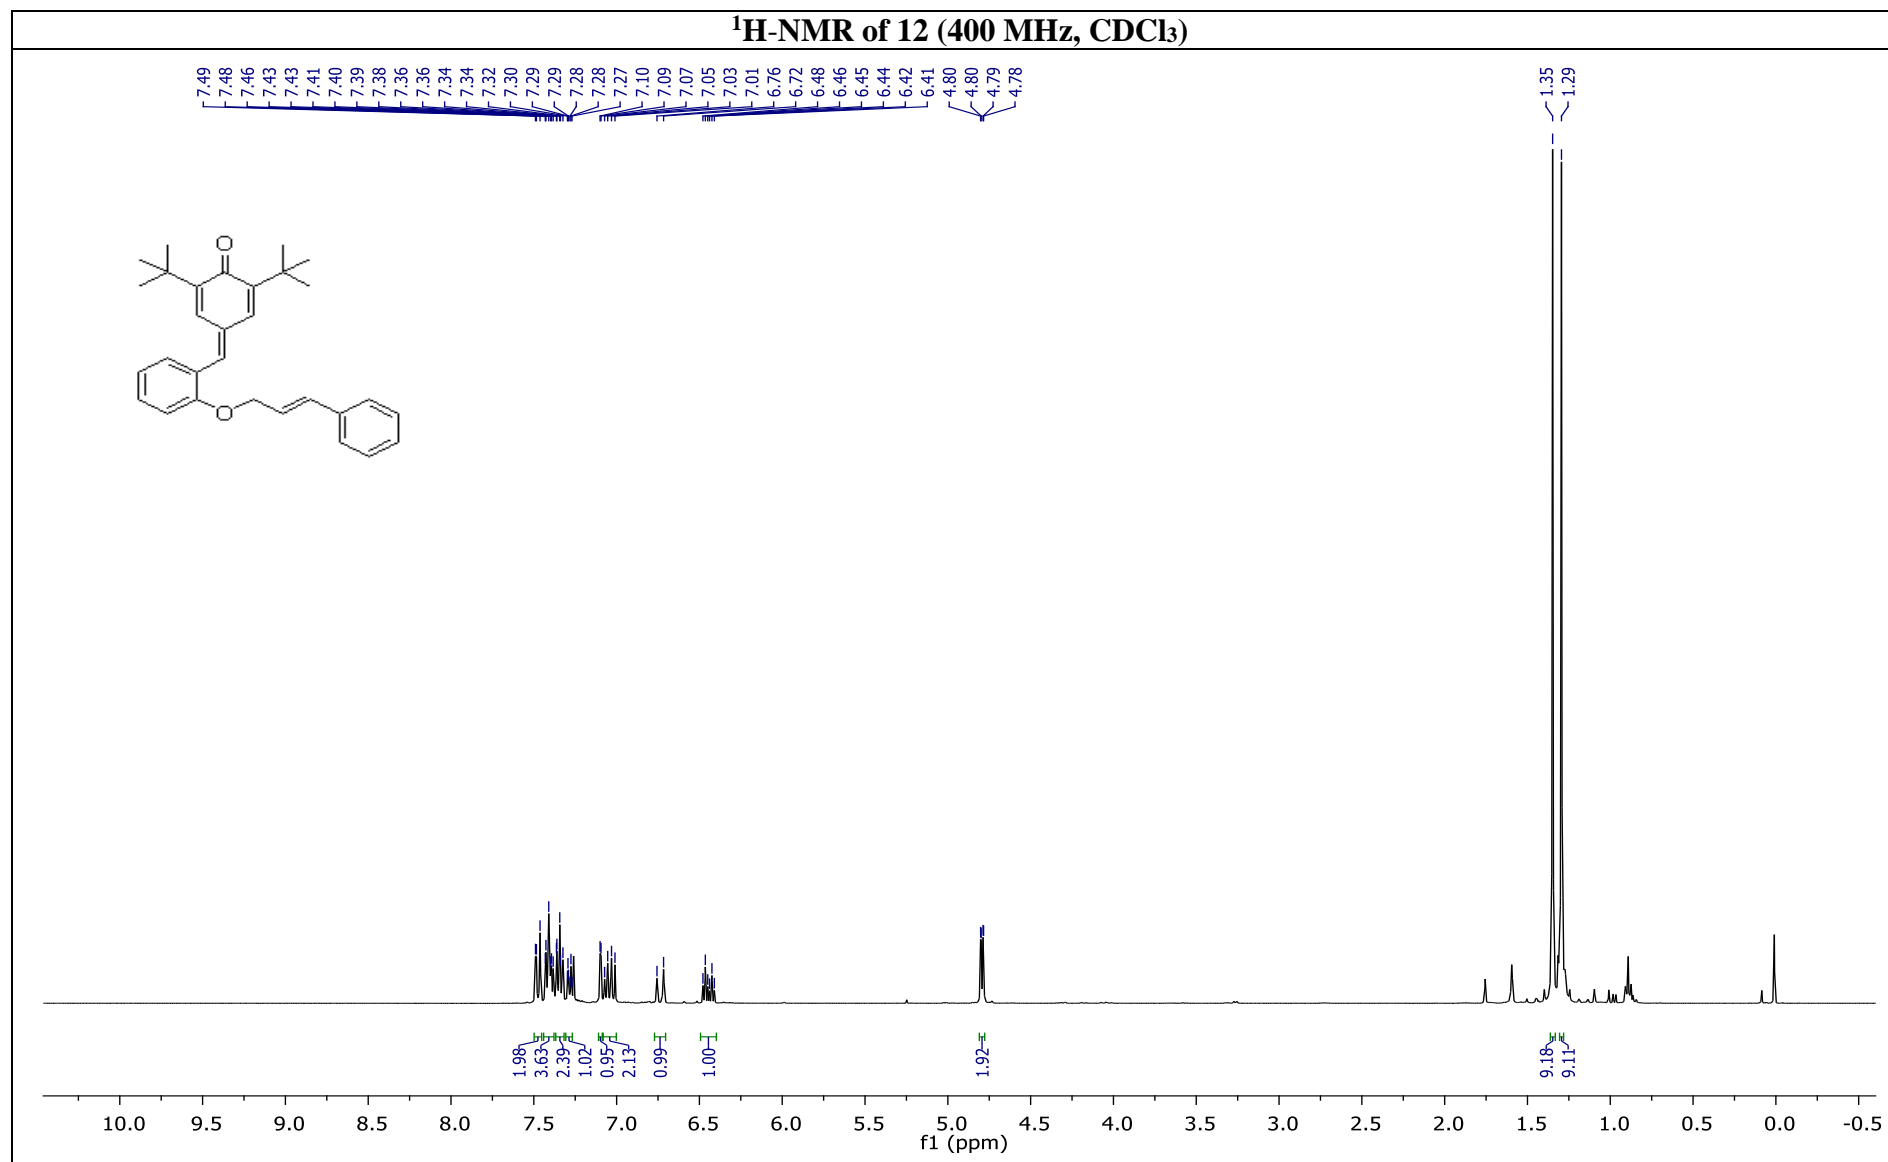

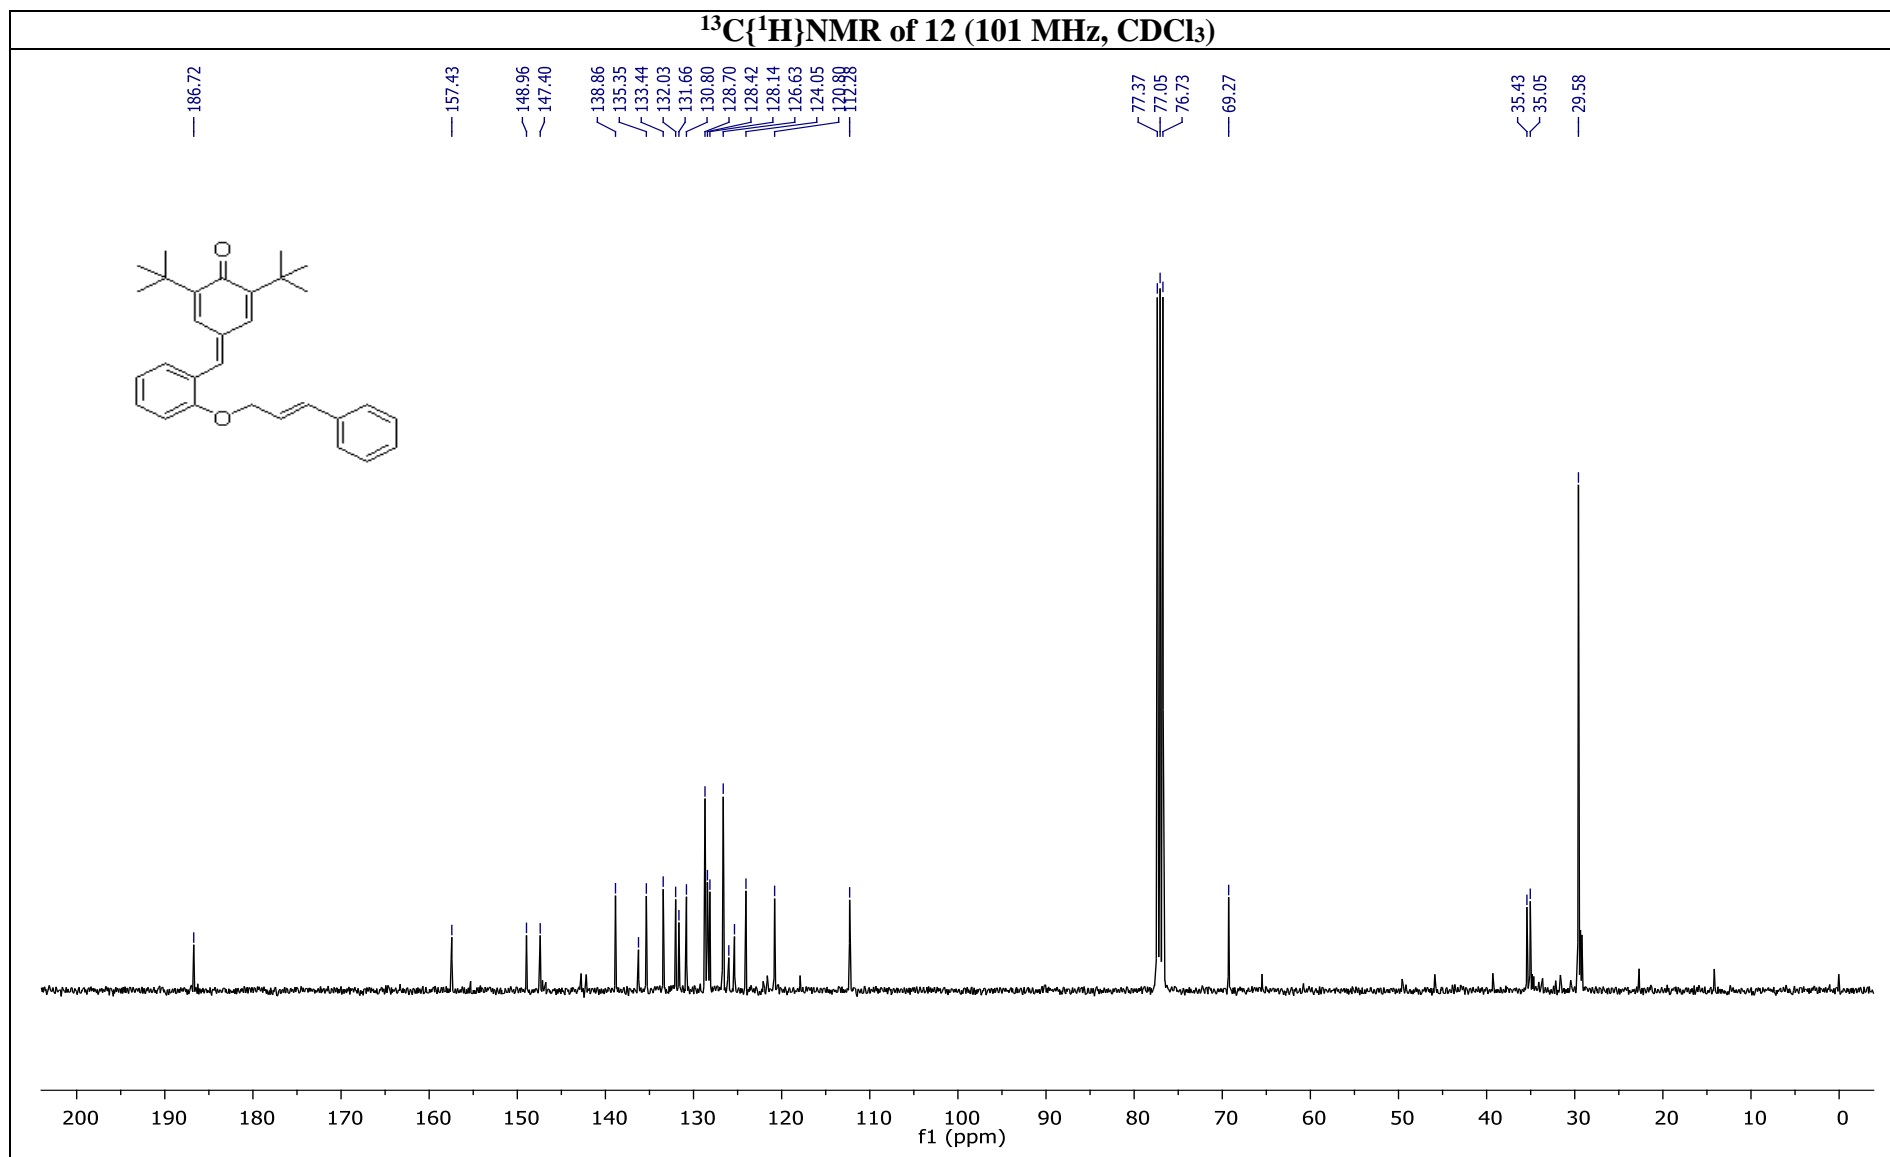

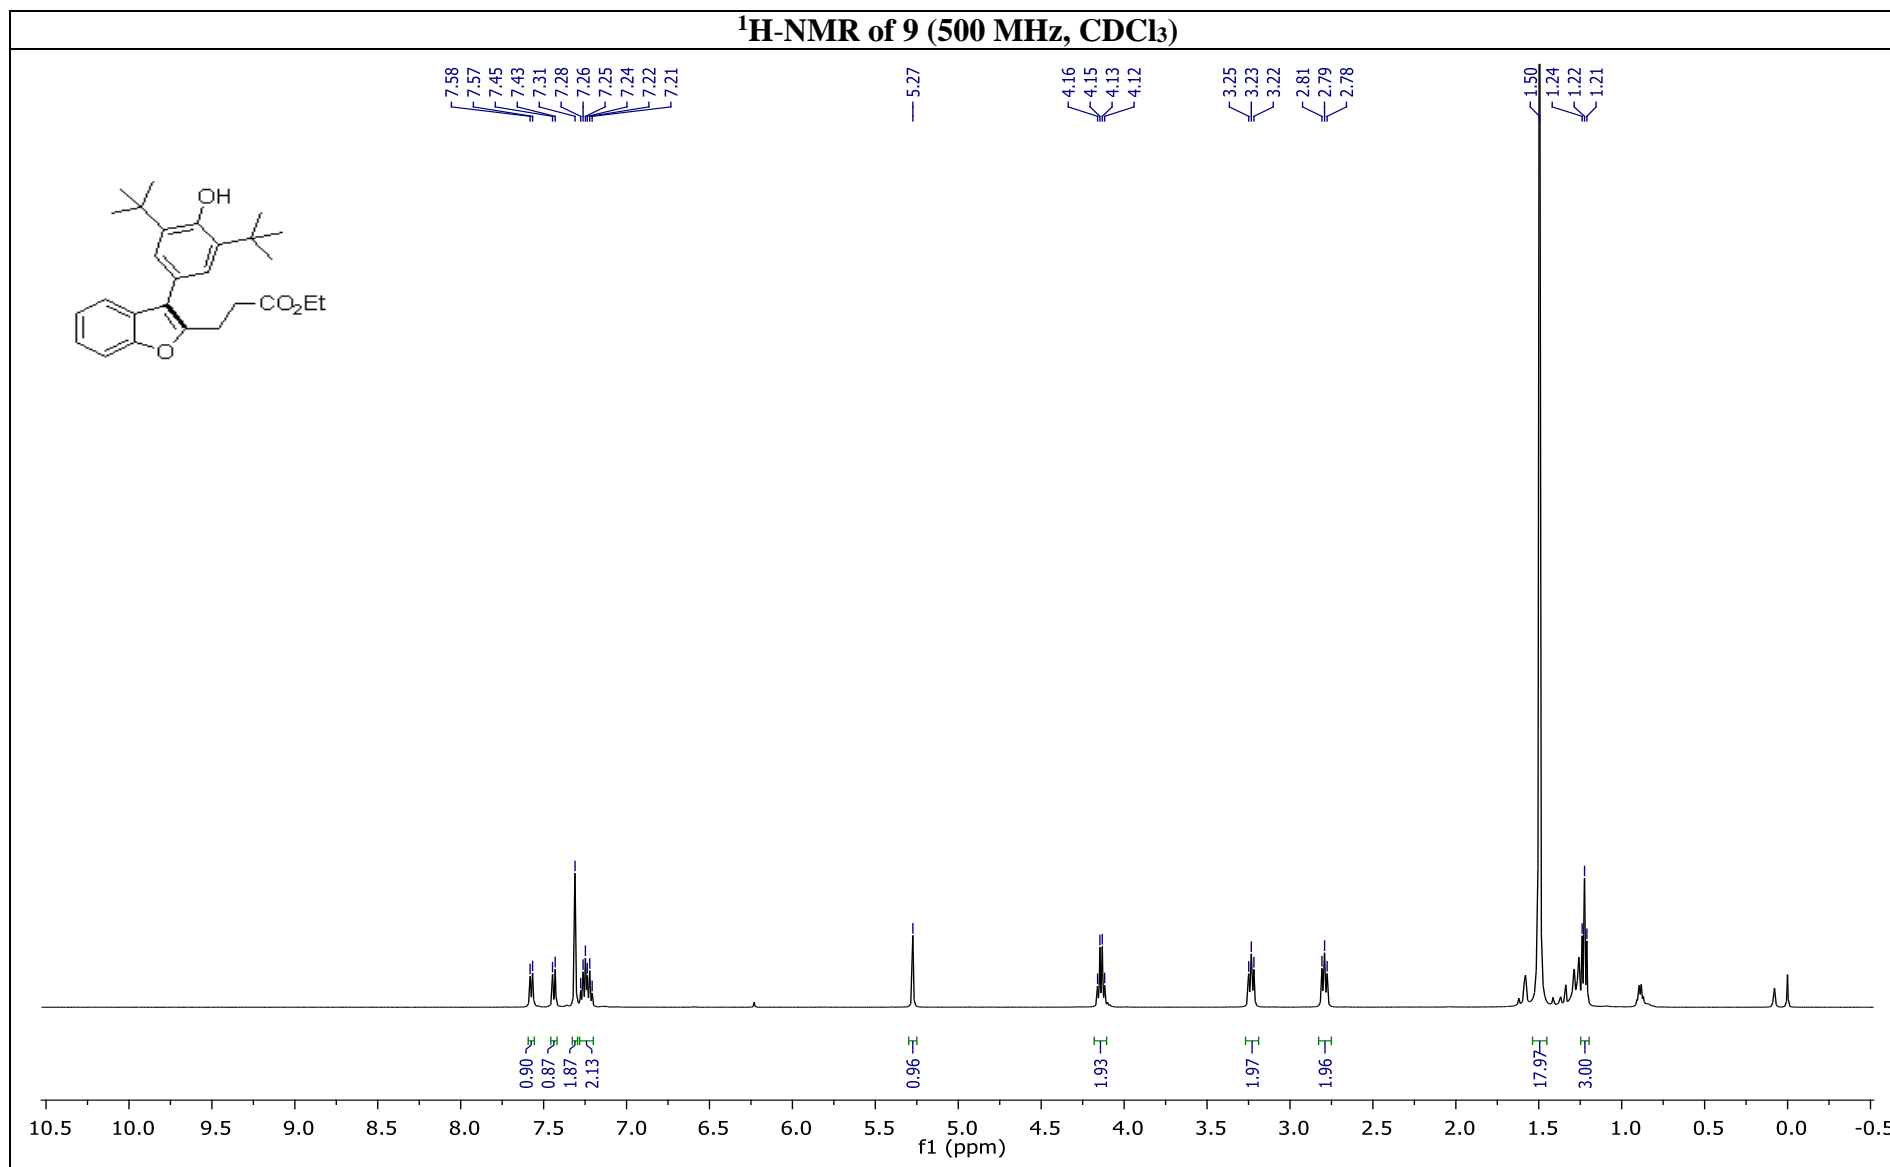

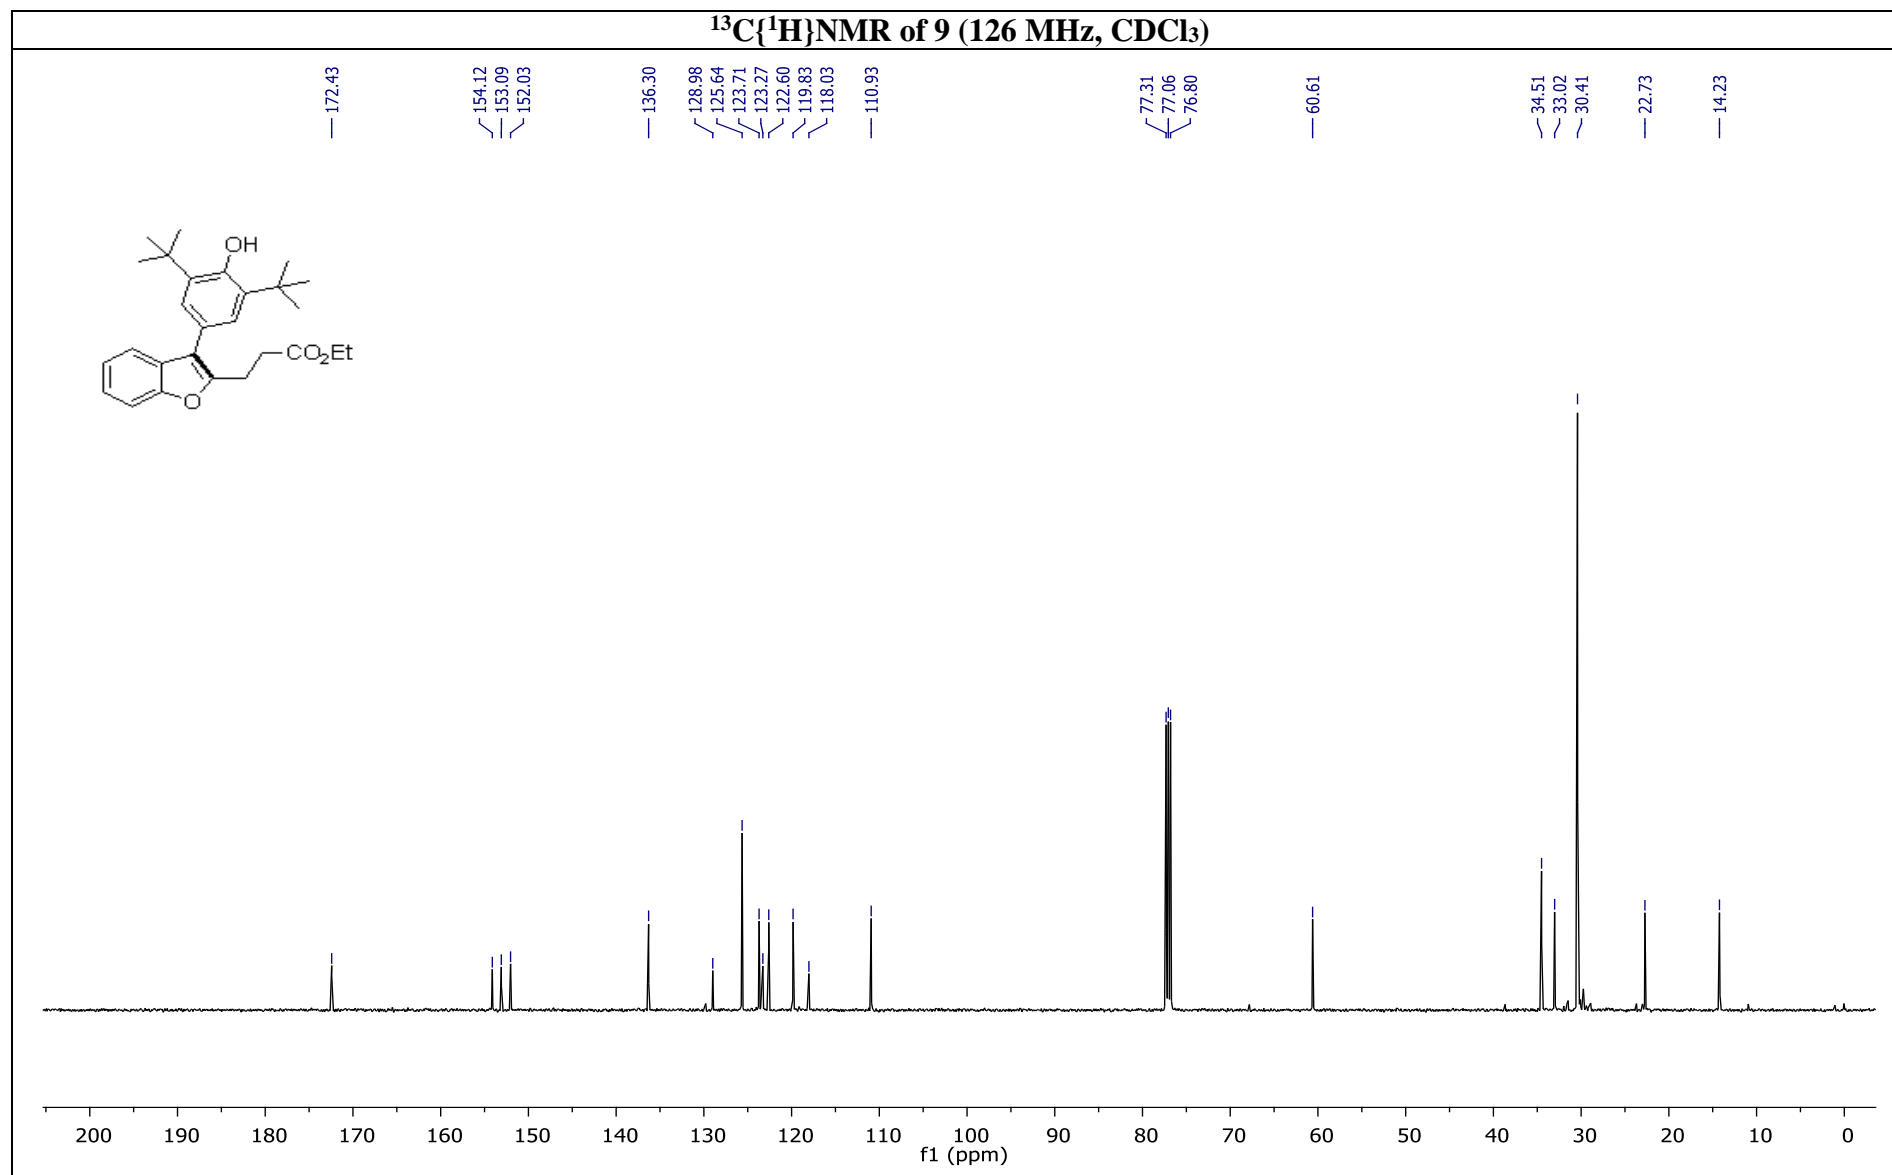

**<sup>1</sup>H-NMR of 10 (500 MHz, DMSO d<sub>6</sub>)**

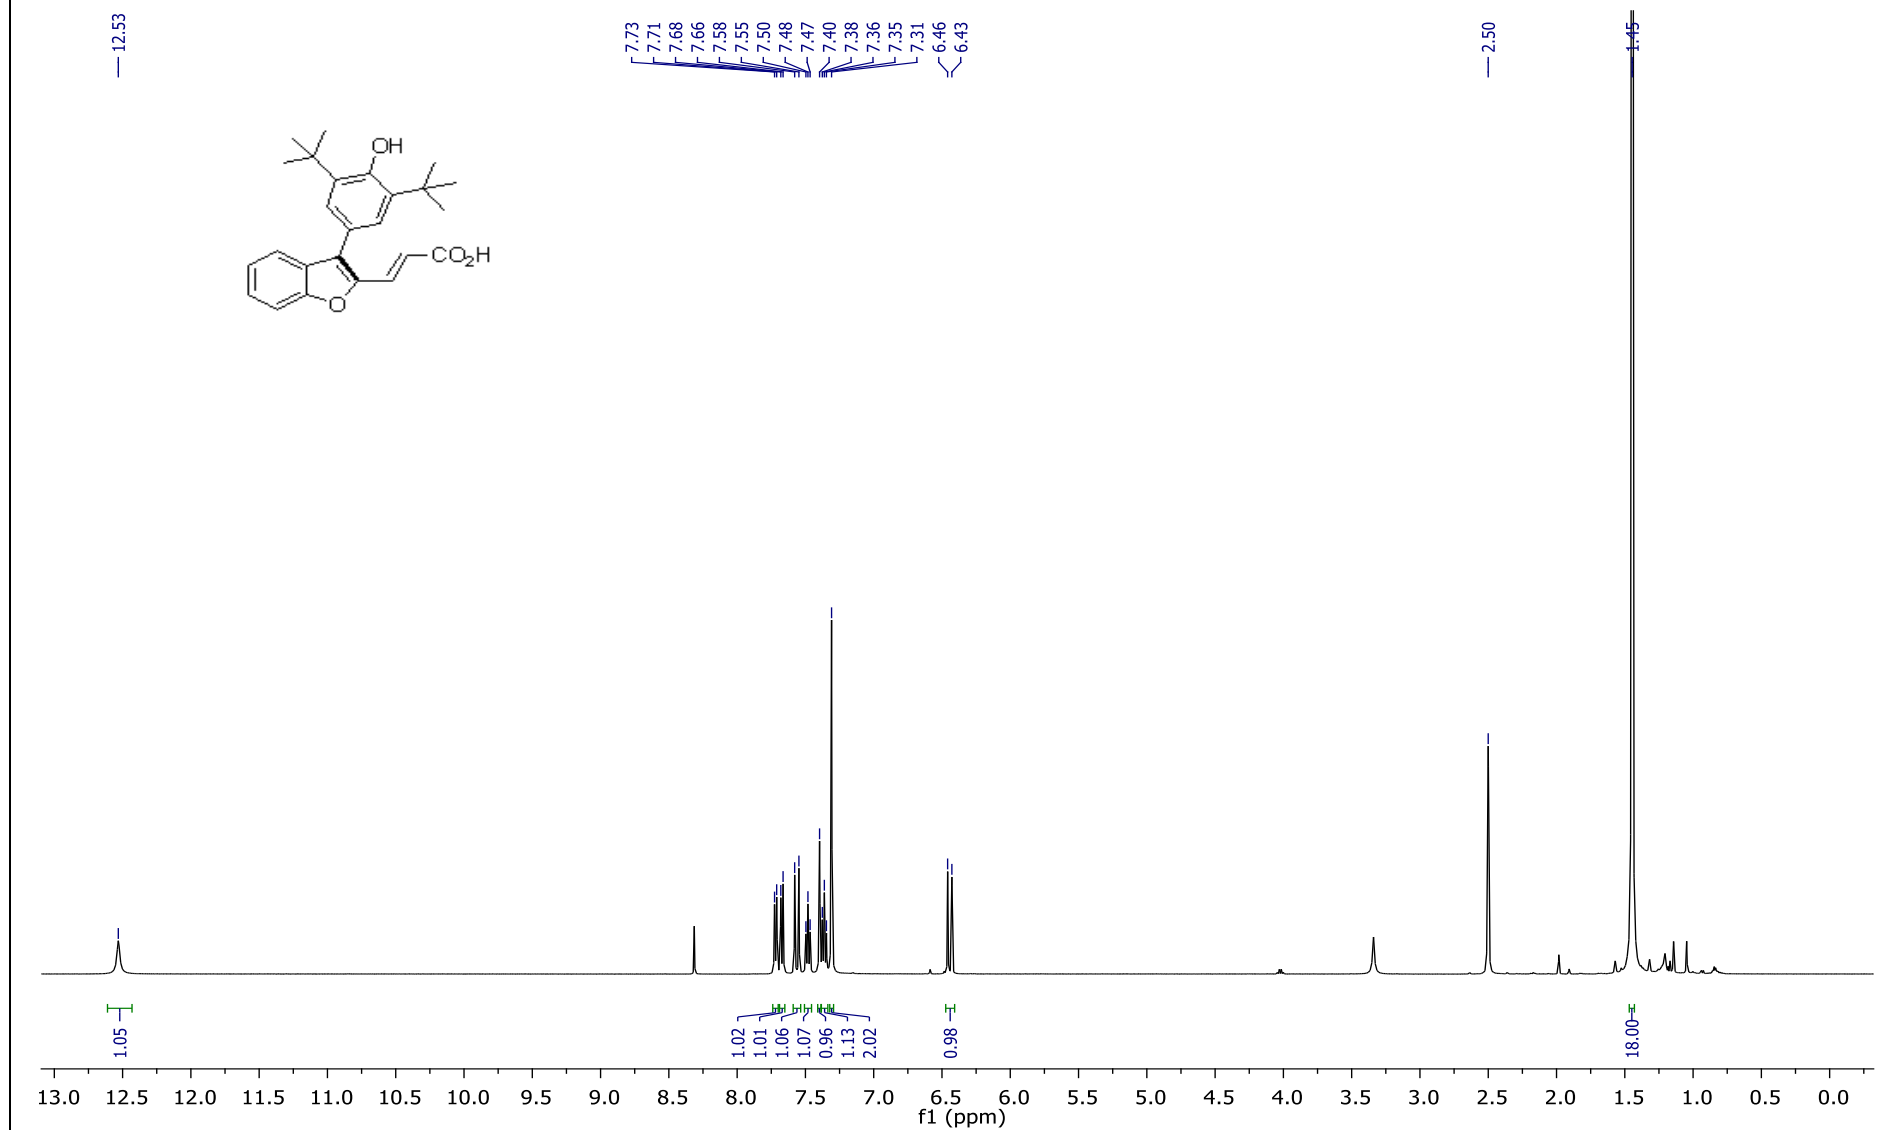

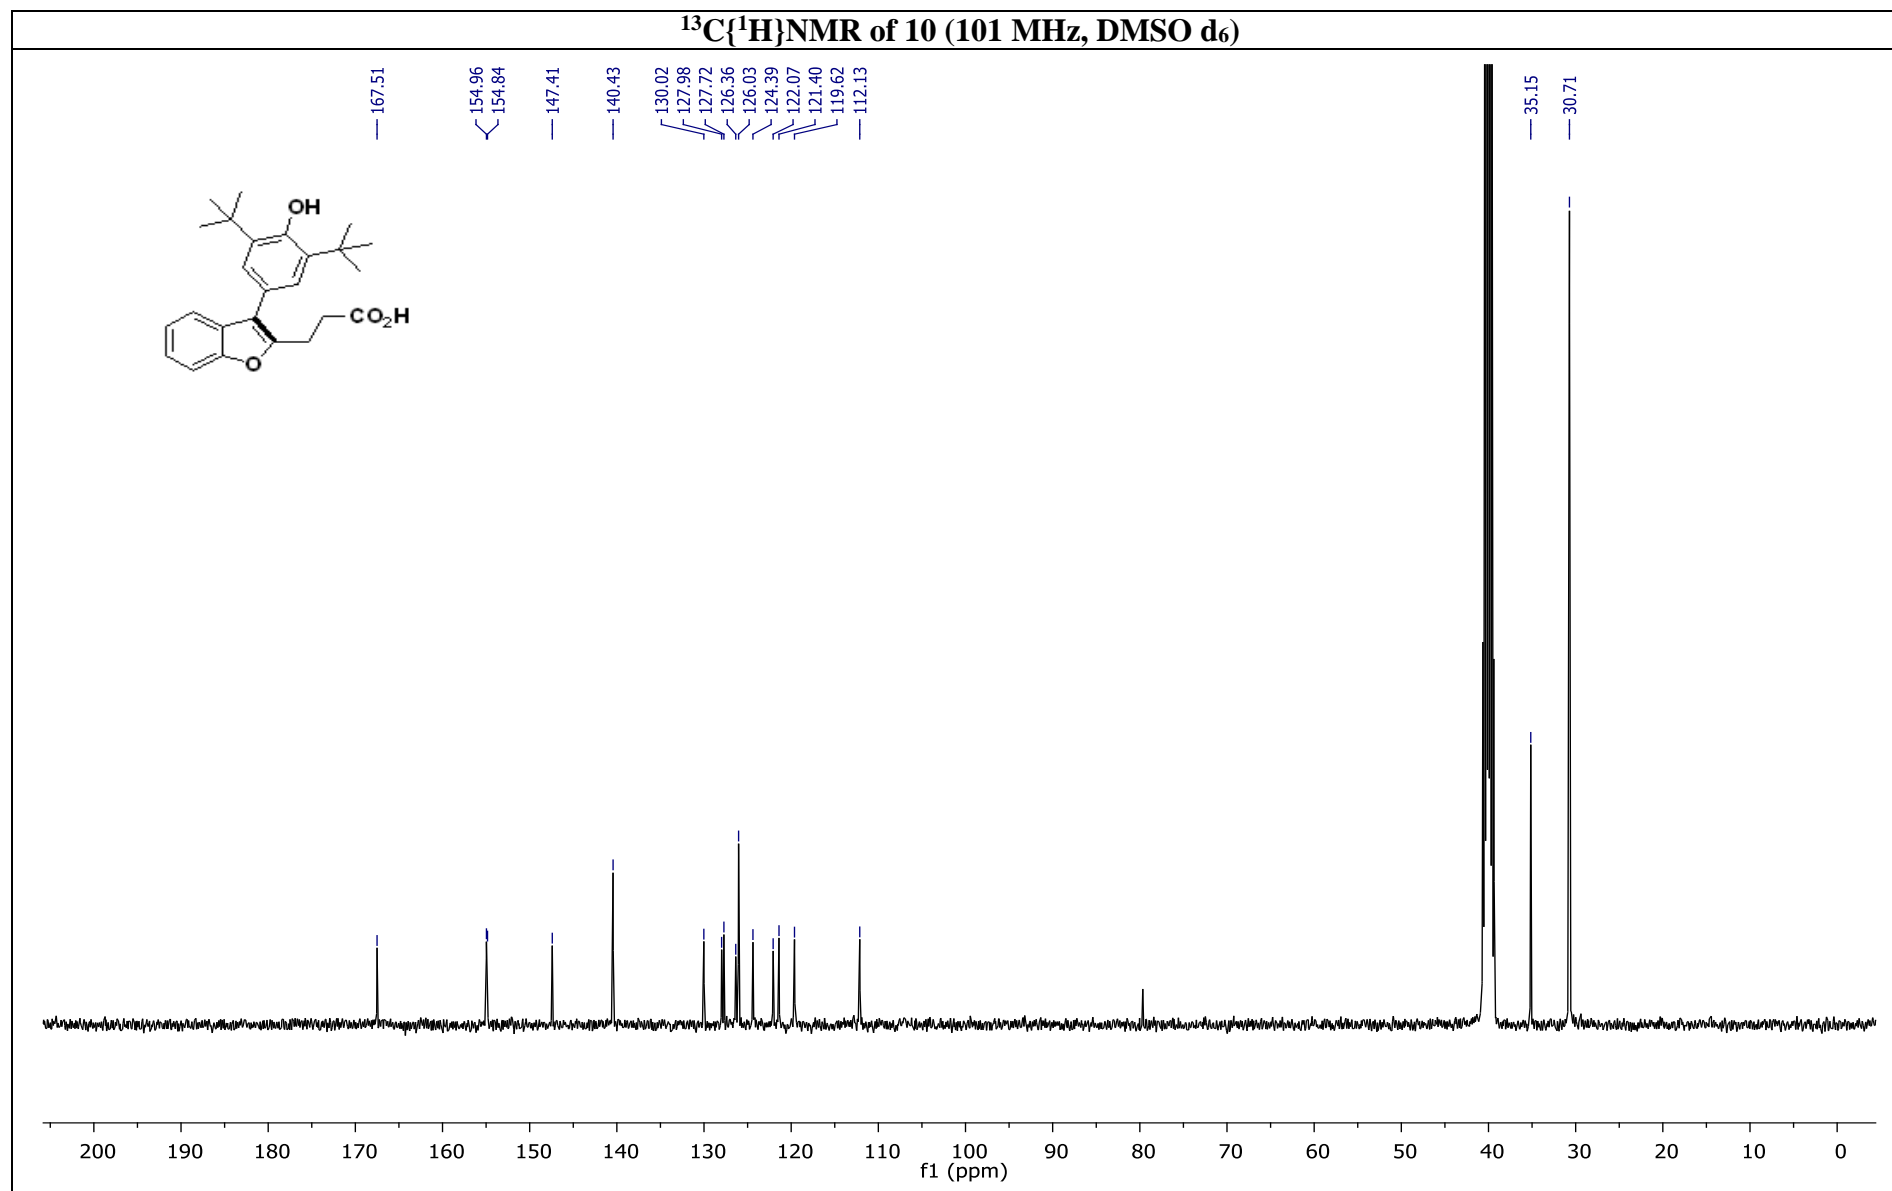

**<sup>1</sup>H-NMR of 11 (400 MHz, DMSO d<sub>6</sub>)**

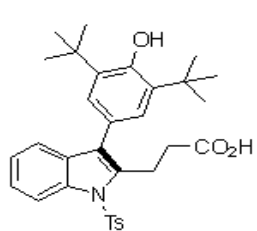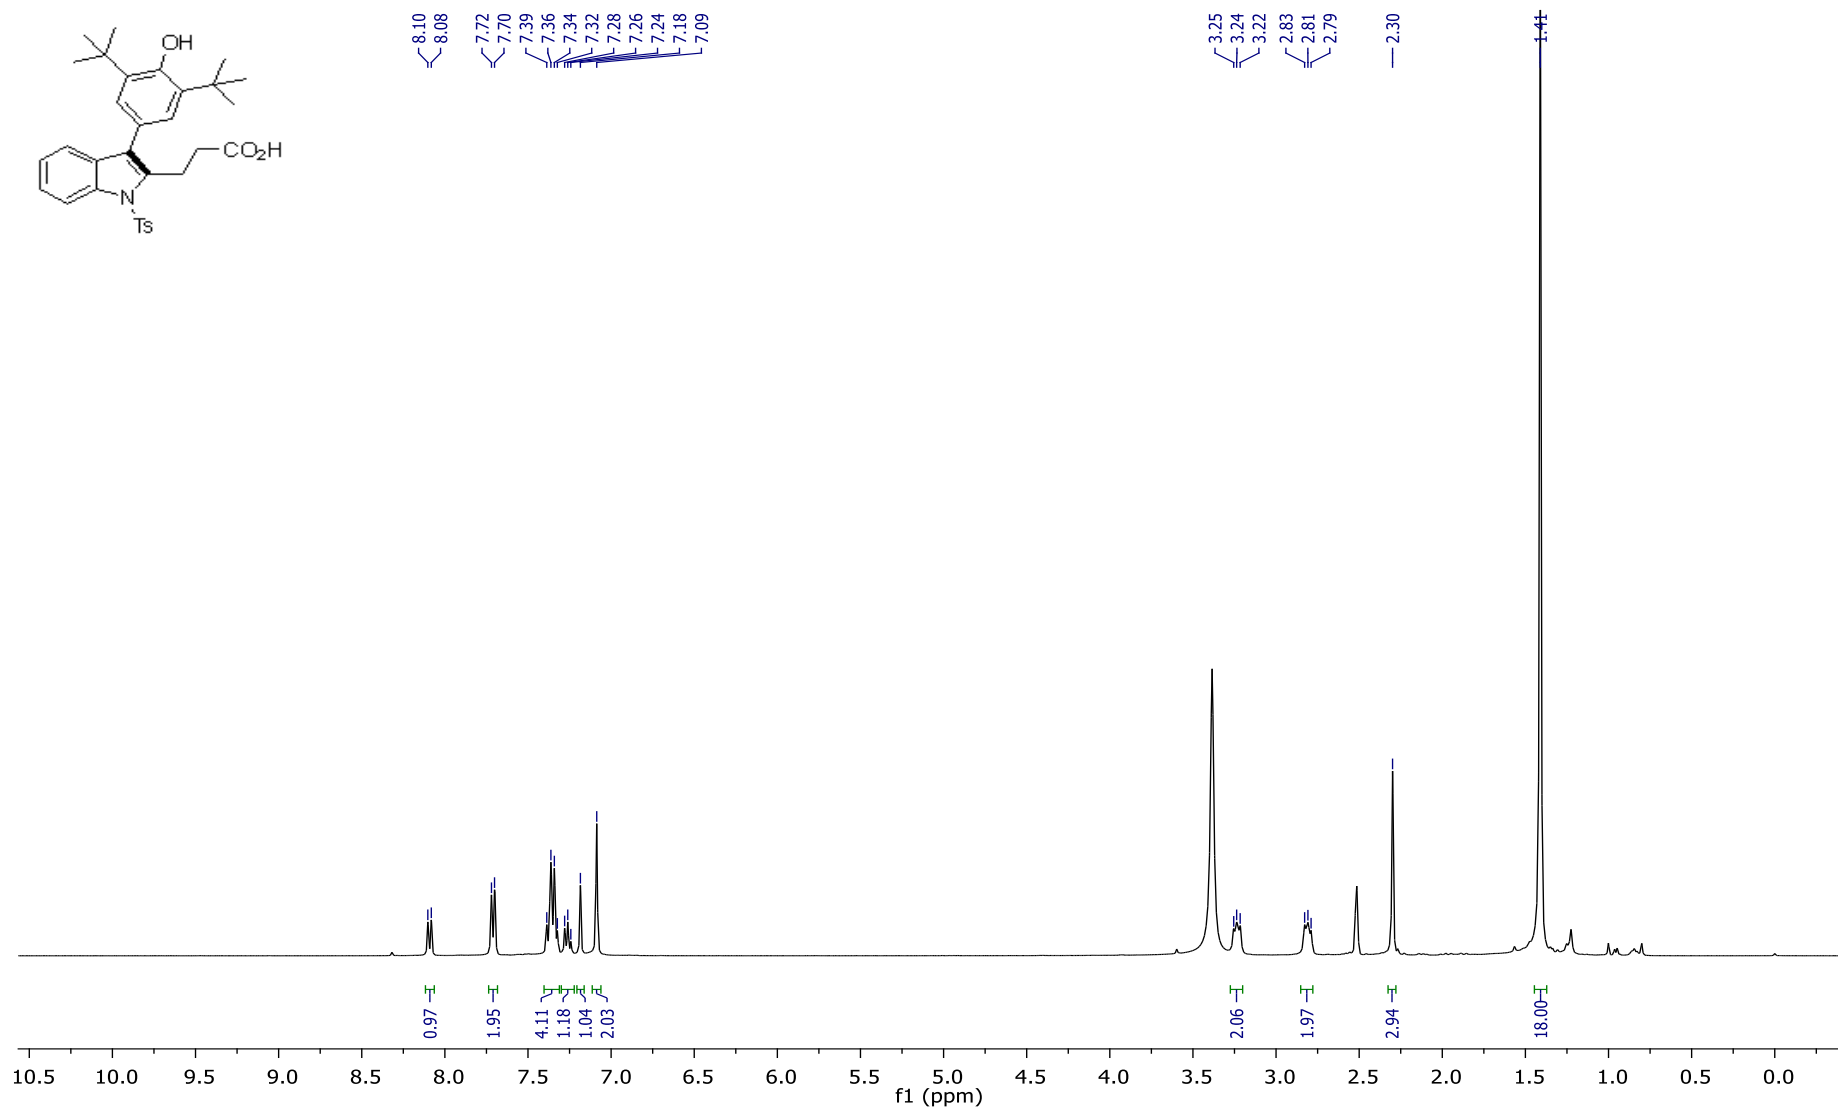

**$^{13}\text{C}\{^1\text{H}\}$ NMR of 11 (101 MHz, DMSO  $\text{d}_6$ )**

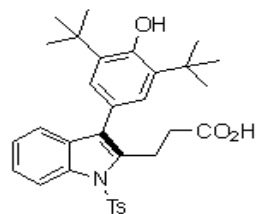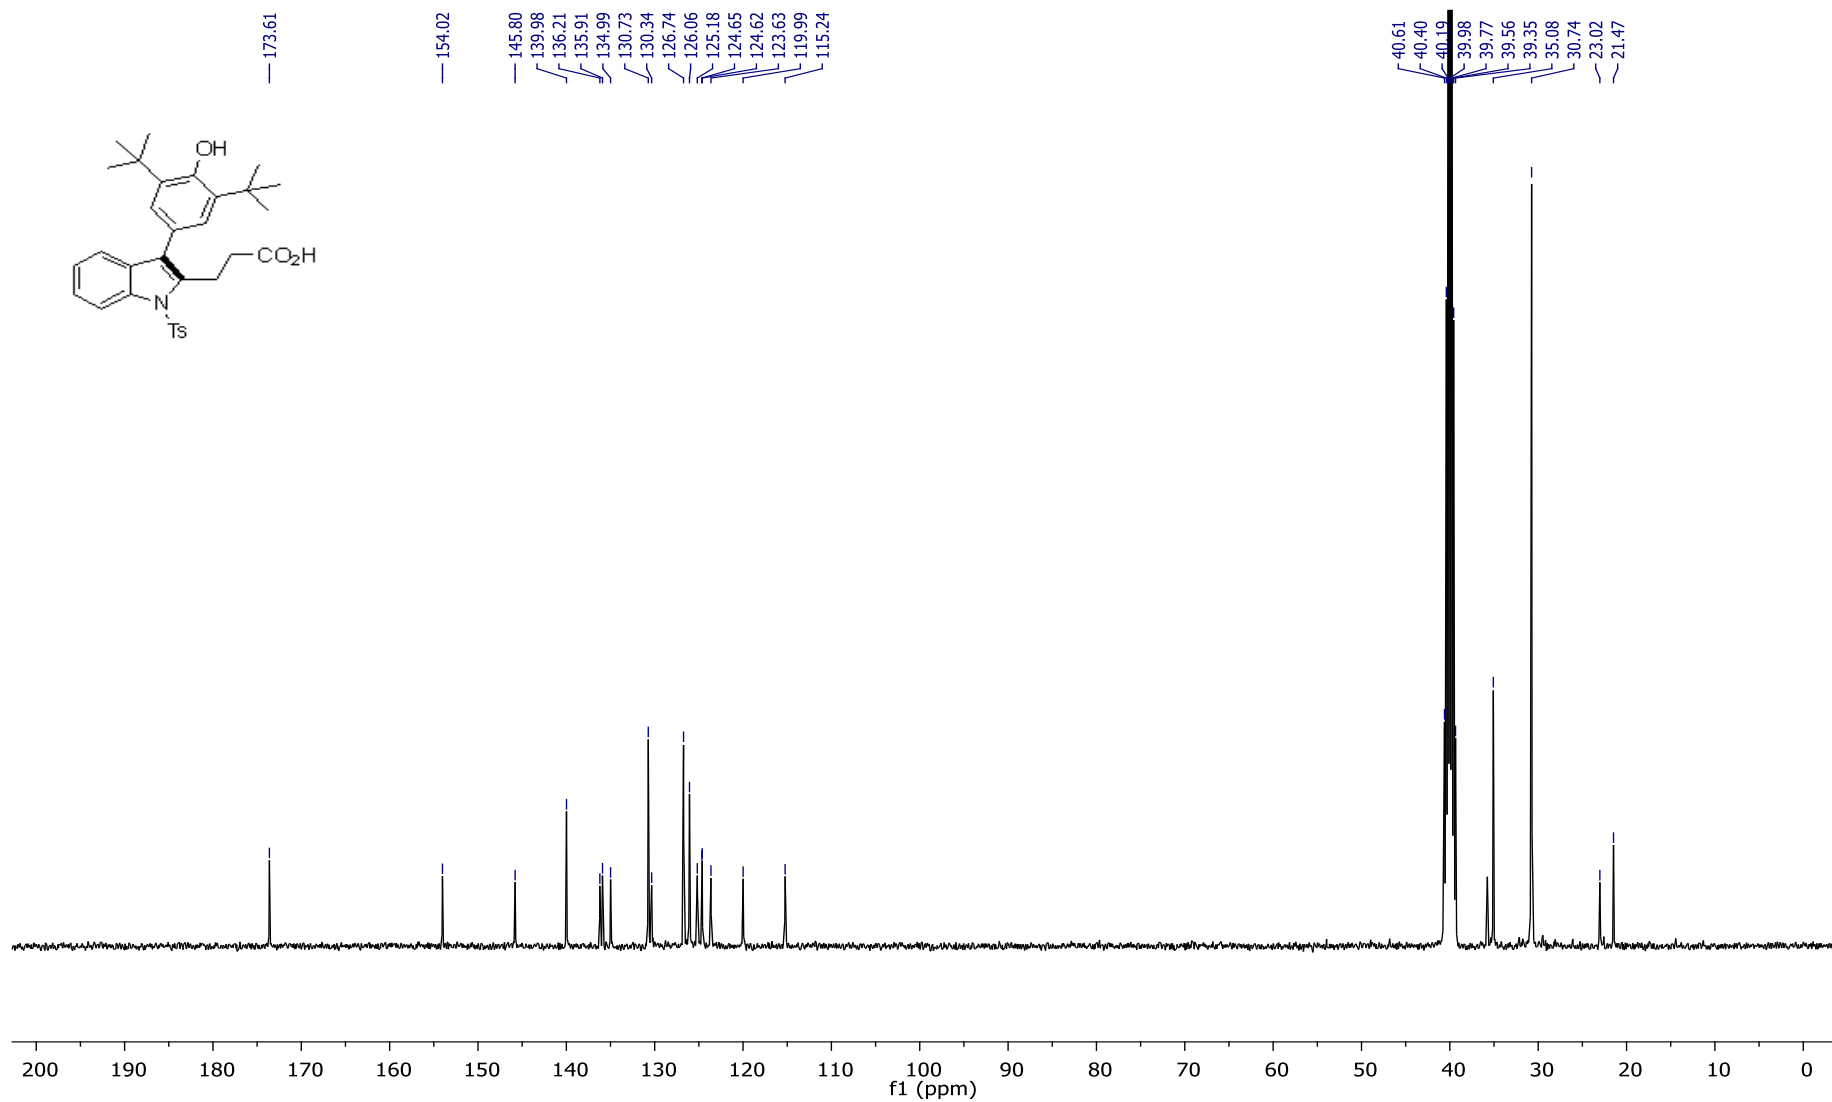

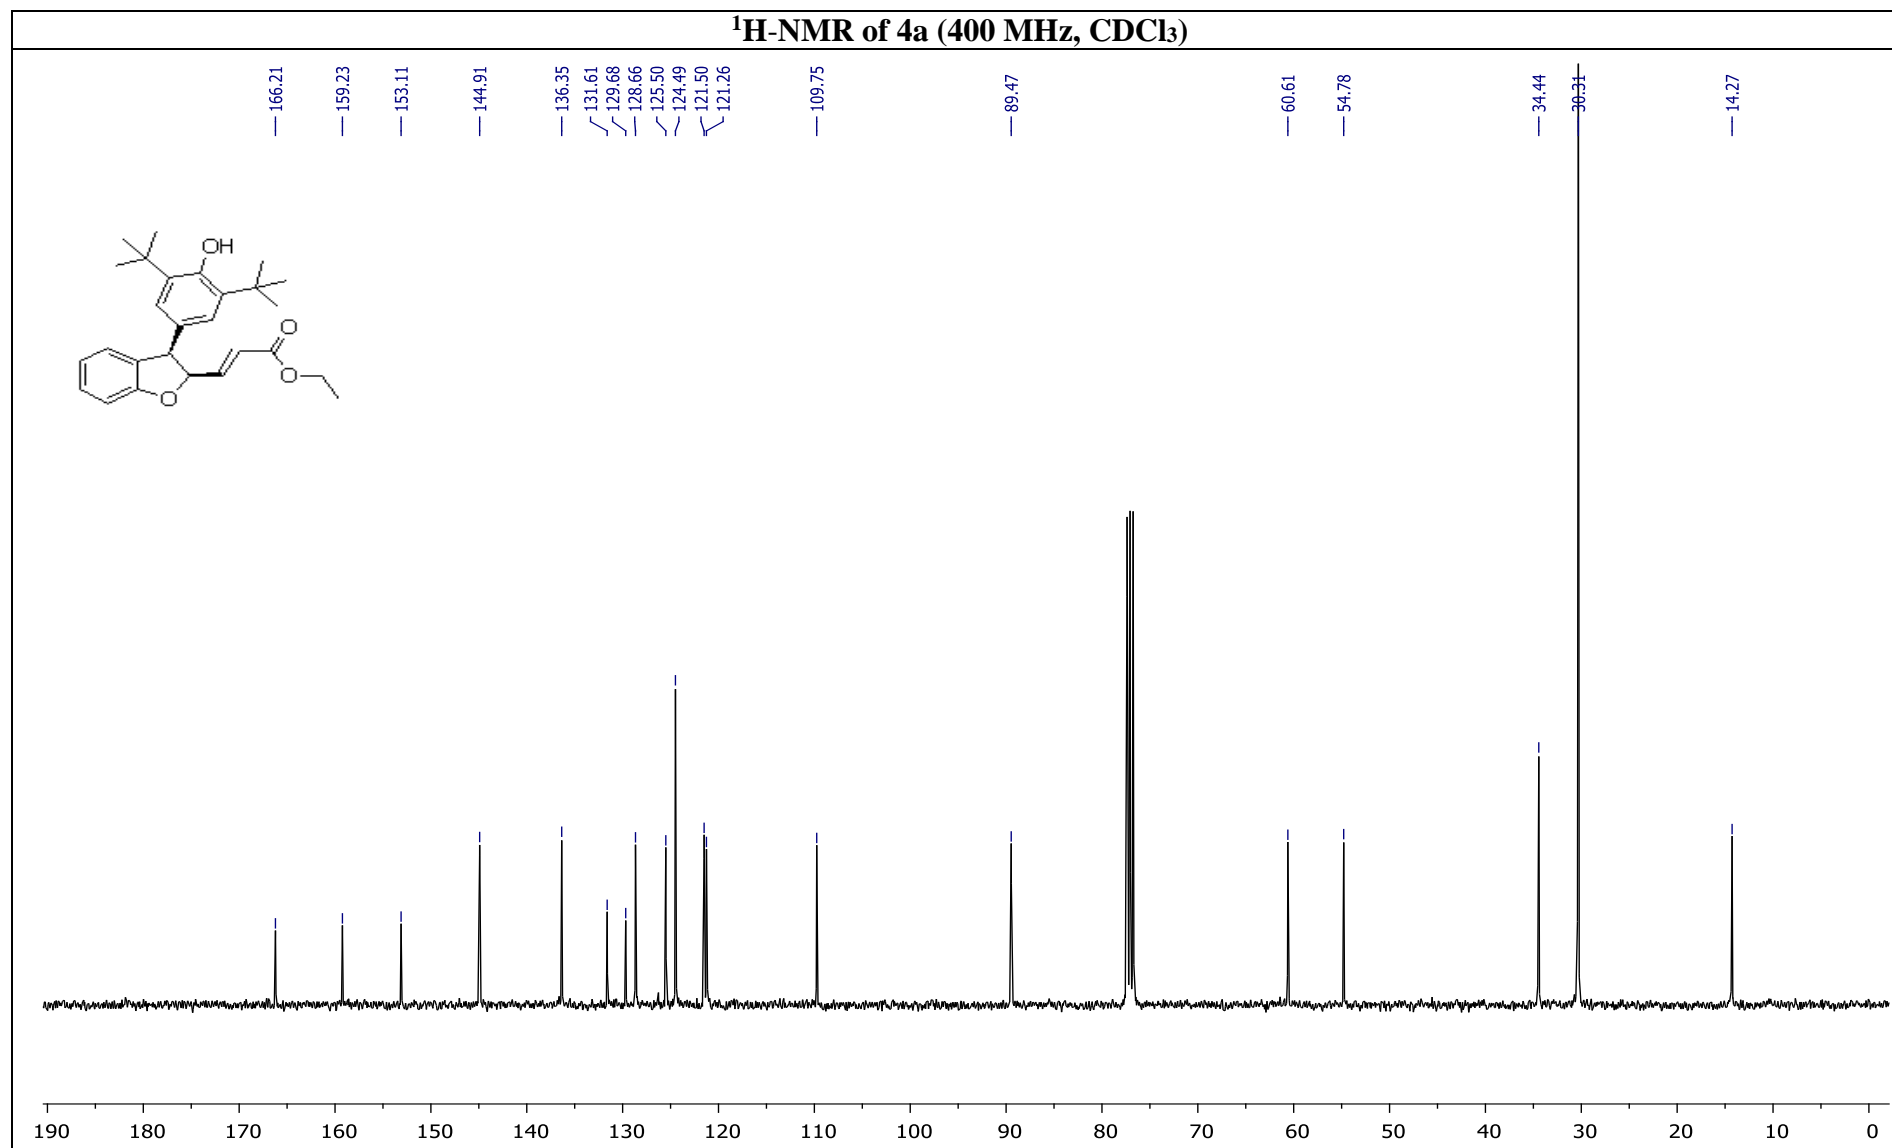

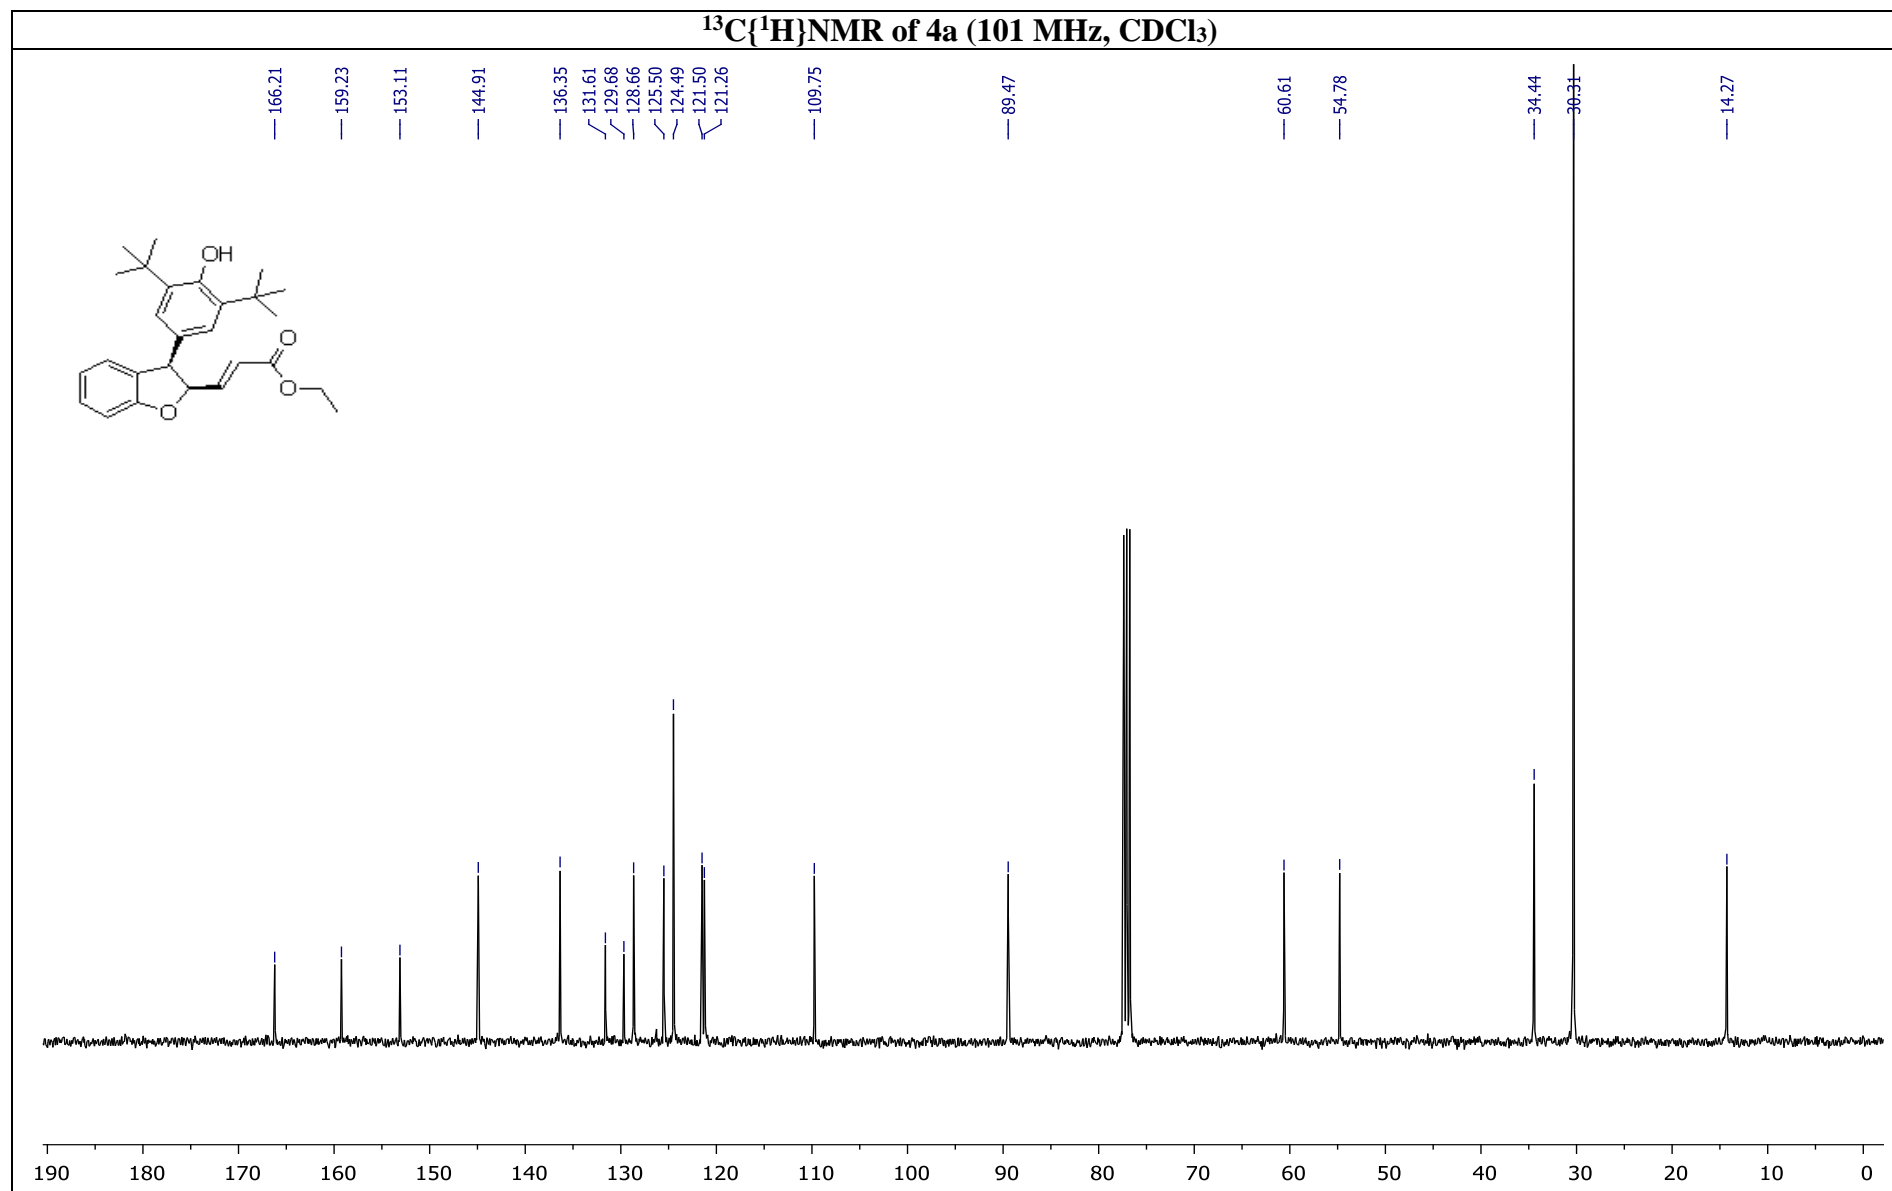

NOE-NMR of 4a

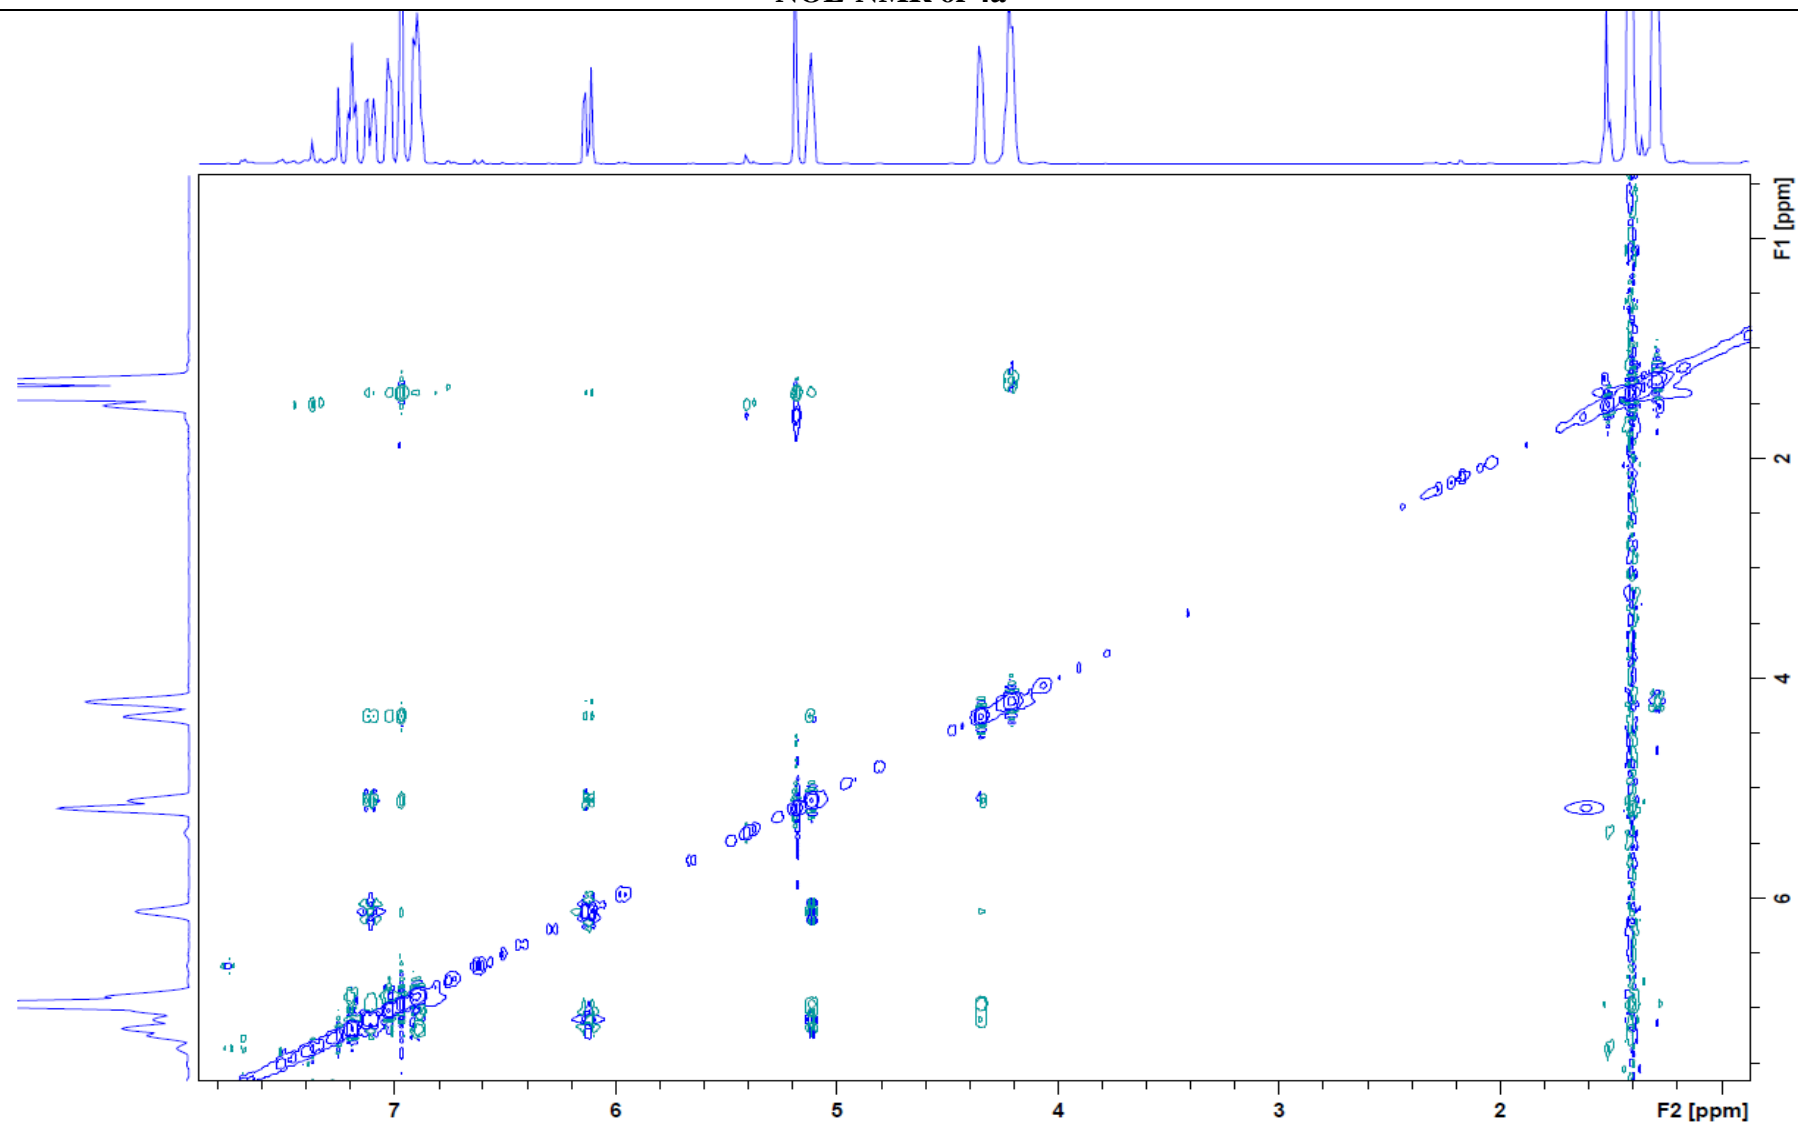

## 8. Crystallographic data for compounds 5i and 7m

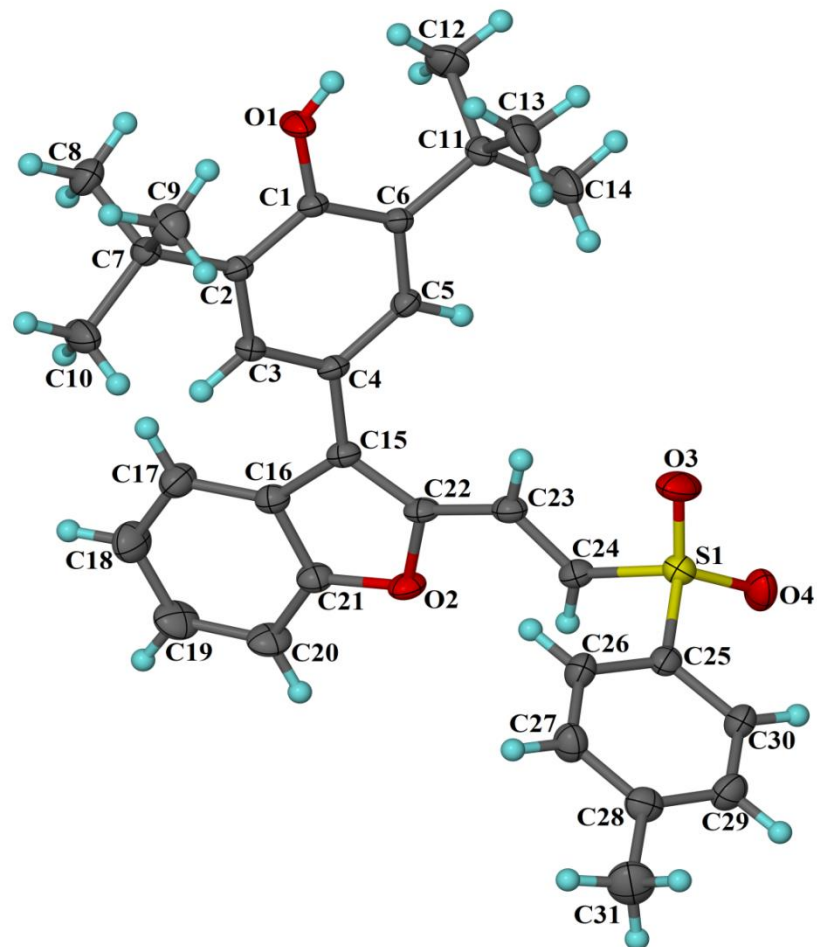

Compound 5i

Figure caption: ORTEP diagram of **5i** compound with the atom-numbering. Displacement ellipsoids are drawn at the 35% probability level and H atoms are shown as small spheres of arbitrary radius.

**Crystal data for 5i:**  $C_{31}H_{34}O_4S^+$  Solvent,  $M = 502.64$ , Monoclinic, space group  $P2_1/c$  (No.14),  $a = 17.6839(9)\text{\AA}$ ,  $b = 11.2101(6)\text{\AA}$ ,  $c = 15.0773(7)\text{\AA}$ ,  $\alpha = 90^\circ$ ,  $\beta = 106.593(2)^\circ$ ,  $\gamma = 90^\circ$ ,  $V = 2864.4(3)\text{\AA}^3$ ,  $Z = 4$ ,  $D_c = 1.166\text{ g/cm}^3$ ,  $F_{000} = 1072$ , Bruker D8 QUEST PHOTON-100, Mo- $K\alpha$  radiation,  $\lambda = 0.71073\text{ \AA}$ ,  $T = 293(2)\text{K}$ ,  $2\theta_{\text{max}} = 55^\circ$ ,  $\mu = 0.145\text{ mm}^{-1}$ , 55165 reflections collected, 6585 unique ( $R_{\text{int}} = 0.1018$ ), 335 parameters,  $R1 = 0.0571$ ,  $wR2 = 0.1314$ ,  $R$  indices based on 3360 reflections with  $I > 2\sigma(I)$  (refinement on  $F^2$ ), Final  $GooF = 1.022$ , largest difference hole and peak =  $-0.4212$  and  $0.227\text{ e.\AA}^{-3}$ . The **CCDC deposition number 2182173** contains the supplementary crystallographic data for this paper which can be obtained free of charge at <https://www.ccdc.cam.ac.uk/structures/>

**Data collection and Structure solution details for 5i:** Single crystal X-ray data were collected at room temperature on a Bruker D8 QUEST equipped with a four-circle kappa diffractometer and Photon 100 detector. An I $\mu$ s microfocus Mo source ( $\lambda = 0.71073\text{\AA}$ ) supplied the multi-mirror monochromated incident beam. A combination of Phi and Omega scans were used to collect the necessary data. Integration and scaling of intensity data were accomplished using SAINT program.<sup>[6]</sup> The structures were solved by Direct Methods using SHELXS97<sup>[7]</sup> and refinement was carried out by full-matrix least-squares technique using SHELXL-2014/7.<sup>[7,8]</sup> Anisotropic displacement parameters were included for all non-hydrogen atoms. All H atoms were positioned geometrically and treated as riding on their parent C atoms, with C-H distances of 0.93--0.97  $\text{\AA}$ , and with  $U_{\text{iso}}(\text{H}) = 1.2U_{\text{eq}}(\text{C})$  or  $1.5U_{\text{eq}}$  for methyl atoms. The compound crystallized with the solvent of crystallization dichloromethane; however, the solvent structure could not be resolved. Hence, the contributions of the solvent molecules were removed from the diffraction data using the SQUEEZE option in PLATON. The SQUEEZE estimated 83 electron counts in the voids of  $257\text{\AA}^3$ .<sup>[8]</sup> The files (.hkl and .ins) generated by PLATON after the SQUEEZE treatment were used for the final refinement of structure.<sup>[9]</sup> The **CCDC deposition number 2182173** contains the supplementary crystallographic data for this paper which can be obtained free of charge at <https://www.ccdc.cam.ac.uk/structures/>

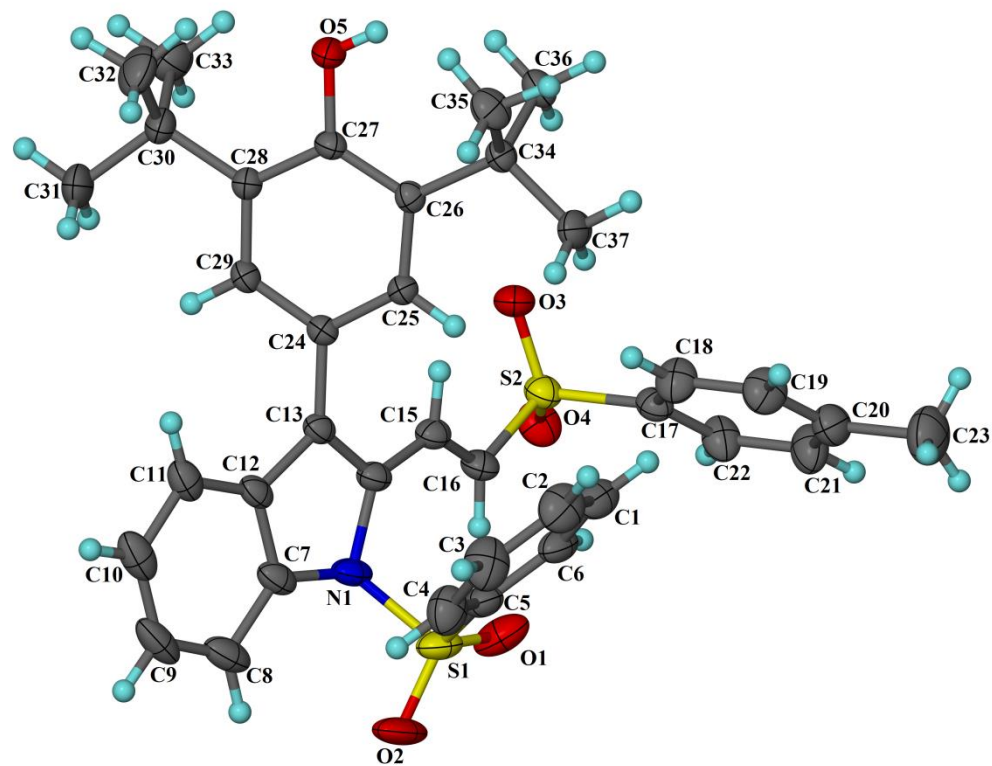

**Compound 7m**

Figure caption: ORTEP diagram of **7m** compound with the atom-numbering. Displacement ellipsoids are drawn at the 35% probability level and H atoms are shown as small spheres of arbitrary radius. The phenyl ring (C1-C6 atoms) is disordered over two sites and only major component of the disordered atoms are shown in ORTEP picture for clarity.

**Crystal data for 7m:**  $C_{37}H_{39}NO_5S_2$ ,  $M = 641.81$ , Monoclinic, Space group  $P2_1/c$ (No.14),  $a = 10.294(2)\text{\AA}$ ,  $b = 19.579(4)\text{\AA}$ ,  $c = 17.114(3)\text{\AA}$ ,  $\alpha = 90^\circ$ ,  $\beta = 99.109(8)^\circ$ ,  $\gamma = 90^\circ$ ,  $V = 3405.9(11)\text{\AA}^3$ ,  $Z = 4$ ,  $D_c = 1.252\text{ g/cm}^3$ ,  $F_{000} = 1360$ , Bruker D8 QUEST PHOTON III C7 HPAD detector, Mo-K $\alpha$  radiation,  $\lambda = 0.71073\text{ \AA}$ ,  $T = 294(2)\text{K}$ ,  $2\theta_{\text{max}} = 50^\circ$ ,  $\mu = 0.199\text{ mm}^{-1}$ , 37337 reflections collected, 7766 unique ( $R_{\text{int}} = 0.0710$ ), 436 parameters,  $RI = 0.0523$ ,  $wR2 = 0.1050$ ,  $R$  indices based on 4068 reflections with  $I > 2\sigma(I)$  (refinement on  $F^2$ ), Final  $Goof = 0.994$ , largest difference hole and peak =  $-0.293$  and  $0.185\text{ e.\AA}^{-3}$ . **CCDC deposition number 2252885** contains the supplementary crystallographic data for this paper which can be obtained free of charge at <https://www.ccdc.cam.ac.uk/structures/>

**Data collection and Structure solution details for 7m:** X-ray data for the compound were collected at room temperature on a Bruker D8 QUEST instrument with an I $\mu$ S Mo microsource ( $\lambda = 0.7107\text{ \AA}$ ) and a PHOTON-III C7 HPAD detector. The raw data frames were reduced and corrected for absorption effects using the Bruker Apex 3 software suite programs <sup>[10]</sup>. The structure was solved using intrinsic phasing method <sup>[11]</sup> and further refined with the SHELXL <sup>[11-13]</sup> program and expanded using Fourier techniques. Anisotropic displacement parameters were included for all non-hydrogen atoms. All C bound H atoms were positioned geometrically and treated as riding on their parent C atoms [ $C-H = 0.93-0.97\text{ \AA}$ , and  $U_{\text{iso}}(H) = 1.5U_{\text{eq}}(C)$  for methyl H or  $1.2U_{\text{eq}}(C)$  for other H atoms]. The phenyl ring carbon atoms were disordered over two sites, with site occupancy factor of  $0.53(2)$  for the major component of the disordered atoms (C1/C2/C3/C4/C5/C6) and  $0.47(2)$  for the minor component of the disordered atoms (C1D/C2D/C3D/C4D/C5D/C6D). PART, FVAR, DELU, and SIMU instructions were utilized for modelling the structural disorder and structural refinement. **CCDC deposition number 2252885** contains the supplementary crystallographic data for this paper which can be obtained free of charge at <https://www.ccdc.cam.ac.uk/structures/>

## 9. References

- 1) (a) K. Zhao, Y. Zhi, T. Shu, A. Valkonen, K. Rissanen and D. Enders, *Angew. Chem., Int. Ed.* 2016, **55**, 12104; (b) S. Liu, X-C. Lan, K. Chen, W.-J. Hao, G. Li, S.-J. Tu and B. Jiang, *Org. Lett.* 2017, **19**, 3831; (c) C. Duan, L. Ye, W. Xu, X. Li, F. Chen, Z. Zhao and X. Li, *Chin. Chem. Lett.* 2018, **29**, 1273.
- 2) (a) A. Banerji and S. C. Pal, *Phytochemistry* 1983, **22**, 1028; (b) F. Serpier, J.-L. Brayer, B. Folleas and S. Darses, *Org. Lett.* 2015, **17**, 5496; (c) A. Padwa, S. S. Murphree, Z. Ni and S. H. Watterson, *J. Org. Chem.* 1996, **61**, 3829; (d) X. Ji, T. Peng, X. Zhang, J. Li, W. Yang, L. Tong, R. Qu, H. Jiang, J. Ding and H. Xie, *Bioorg. Med. Chem.* 2014, **22**, 2366.
- 3) (a) A. D. Gammack Yamagata, S. Datta, K. E. Jackson, L. Stegbauer, R. S. Paton and D. J. Dixon, *Angew. Chem., Int. Ed.* 2015, **54**, 4899; (b) C. Bai, S. Wu, S. Ren, M. Zhu, G. Luo and H. Xiang, *Bioorg. Med. Chem.* 2021, **47**, 116395; (c) Y. Du, A. Yu, J. Jia, Y. Zhang and X. Meng, *Chem. Comm.* 2017, **53**, 1684.
- 4) (a) X. Tian, Y. Zhang, W. Ren and Y. Wang, *Org. Chem. Front.* 2022, **9**, 615; (b) F. Luo, H. Dong, W. Ren and Y. Wang, *Org. Lett.* 2022, **24**, 7727; (c) J. Wang, L. Zhao, C. Zhu, B. Ma, X. Xie, J. Liu, S. He, M. Rueping, K. Zhao and L. Hu, *Chin. Chem. Lett.* 2022, **33**, 4549.
- 5) F. Miege, C. Meyer and J. Cossy, *Angew. Chem., Int. Ed.* 2011, **50**, 5932.
- 6) SMART & SAINT. Software Reference manuals. Versions 6.28a & 5.625, Bruker Analytical X-ray Systems Inc., Madison, Wisconsin, U.S.A., 2001.
- 7) Sheldrick, G. M. SHELXS97 and SHELXL Version 2014/7, <http://shelx.uni-ac.gwdg.de/SHELX/index.php>
- 8) P. Muller, R. Herbst-Imer, A. L. Spek, T. R. Schneider and M. R. Sawaya, Crystal Structure Refinement: A Crystallographer's Guide to SHELXL. Muller, P. Ed. 2006 Oxford University Press: Oxford, New York, pp. 57–91.
- 9) A. L. Spek, *J. Appl. Cryst.* 2003, **36**, 7.

- 10) Bruker (2016). APEX3, SAINT and SADABS. Bruker AXS, Inc., Madison, Wisconsin, USA.
- 11) G. M. Sheldrick, *Acta Crystallogr.* 2015, **C71**, 3.
- 12) C. B. Hübschle, G. M. Sheldrick and B. Dittrich, *J. Appl. Cryst.* 2011, **44**, 1281.
